# Supplementary material for: Covalent linkage of the DNA repair template to the CRISPR-Cas9 nuclease enhances homology-directed repair
Source: eLife. 2018 May 29;7:e33761. doi: 10.7554/eLife.33761 (PMC6023611; doi:10.7554/eLife.33761)
Supplement: Figure 3—source data 1. [file elife-33761-fig3-data1.xlsx]

## Sheet: Figure 3-Figure Supplement 1
Figure	Panel	Sample name	Value	Numerical data								Figure	Panel	Sample name	Mann Whitney test p value summary	Mann Whitney test exact p value
				biological replicate 1	biological replicate 2	biological replicate 3	biological replicate 4	biological replicate 5	biological replicate 6	biological replicate 7
Figure 3-Figure Supplement 1	A	NT	Corrected cells (%)	0	0	0.000394	0	0	0	-		Figure 3-Figure Supplement 1	A	49-mer	**	0.0011
Figure 3-Figure Supplement 1	A	no oligo	Corrected cells (%)	0	0.00733	0.00321	0.00232	0	0.00275	-		Figure 3-Figure Supplement 1	A	65-mer
Figure 3-Figure Supplement 1	A	49-mer	Corrected cells (%)	1.5	1.35	1.41	2.03	1.6	1.95	-		Figure 3-Figure Supplement 1	A	65-mer	*	0.013
Figure 3-Figure Supplement 1	A	65-mer	Corrected cells (%)	4.6	3.68	3.92	5.29	4.7	5.03	-		Figure 3-Figure Supplement 1	A	81-mer
Figure 3-Figure Supplement 1	A	81-mer	Corrected cells (%)	6.4	6.256	4.65	6.54	6.4	6.8	-		Figure 3-Figure Supplement 1	A	81-mer	ns	0.1126
Figure 3-Figure Supplement 1	A	99-mer	Corrected cells (%)	7.3	6.08	6.27	7.69	7.4	8.22	-		Figure 3-Figure Supplement 1	A	99-mer
Figure 3-Figure Supplement 1	A	127-mer	Corrected cells (%)	7.2	4.98	5.87	8.45	5.6	8.98	-		Figure 3-Figure Supplement 1	A	99-mer	ns	0.2944
Figure 3-Figure Supplement 1	A	150-mer	Corrected cells (%)	6.3	4.63	5.46	8.01	7.2	9.05	-		Figure 3-Figure Supplement 1	A	127-mer
Figure 3-Figure Supplement 1	B	sgRNASpCas9(mutRFP)	Edited cells (%)	6.43	9.44	23.22	16.1	6.2	18.7	29.7613		Figure 3-Figure Supplement 1	A	127-mer	ns	0.487
												Figure 3-Figure Supplement 1	A	150-mer
