# Supplementary material for: Covalent linkage of the DNA repair template to the CRISPR-Cas9 nuclease enhances homology-directed repair
Source: eLife. 2018 May 29;7:e33761. doi: 10.7554/eLife.33761 (PMC6023611; doi:10.7554/eLife.33761)
Supplement: Figure 4—source data 1. [file elife-33761-fig4-data1.xlsx]

## Sheet: Fig. 4
Figure	Panel	Sample name	Value	Numerical data					Figure	Panel	Sample name	Mann Whitney test p value summary	Mann Whitney test exact p value
				biological replicate 1	biological replicate 2	biological replicate 3	biological replicate 4
4	A	65-mer unco.	Correction efficiency (%)	1.9	0.9	2.6	2.8		4	A	65-mer unco.	*	0.0143
4	A	65-mer coup.	Correction efficiency (%)	28.5	14.7	22.6	24.1		4	A	65-mer coup.
4	A	81-mer unco.	Correction efficiency (%)	13.8	13.6	4.2	3.9		4	A	81-mer unco.	*	0.0143
4	A	81-mer coup.	Correction efficiency (%)	30.3	28.3	20.9	23.1		4	A	81-mer coup.
4	E	RNP-RNP unco./65-mer/ sgRNASadCas9(mutRFP)-1	Correction efficiency (%)	3.36	4.1	5.36	2.5		4	E	RNP-RNP unco./65-mer/ sgRNASadCas9(mutRFP)-1	*	0.0143
4	E	RNP-RNPD coup./65-mer/sgRNASadCas9(mutRFP)-1	Correction efficiency (%)	30.5	28.1	29.85	30.9		4	E	RNP-RNPD coup./65-mer/sgRNASadCas9(mutRFP)-1
4	E	RNP-RNP unco./65-mer/ sgRNASadCas9(mutRFP)-2	Correction efficiency (%)	3.26	3.7	5.72	4.1		4	E	RNP-RNP unco./65-mer/ sgRNASadCas9(mutRFP)-2	*	0.0143
4	E	RNP-RNPD coup./65-mer/sgRNASadCas9(mutRFP)-2	Correction efficiency (%)	36.09	23.6	31.06	31.1		4	E	RNP-RNPD coup./65-mer/sgRNASadCas9(mutRFP)-2
4	E	RNP-RNP unco./65-mer/ sgRNASadCas9(mutRFP)-3	Correction efficiency (%)	3.52	4	5.57	4.1		4	E	RNP-RNP unco./65-mer/ sgRNASadCas9(mutRFP)-3	*	0.0143
4	E	RNP-RNPD coup./65-mer/sgRNASadCas9(mutRFP)-3	Correction efficiency (%)	34.68	23.9	30.26	29.5		4	E	RNP-RNPD coup./65-mer/sgRNASadCas9(mutRFP)-3
4	E	RNP-RNP unco./65-mer/ sgRNASadCas9(mutRFP)-4	Correction efficiency (%)	3.35	3.7	5.5	3.5		4	E	RNP-RNP unco./65-mer/ sgRNASadCas9(mutRFP)-4	*	0.0143
4	E	RNP-RNPD coup./65-mer/sgRNASadCas9(mutRFP)-4	Correction efficiency (%)	34.43	25	30.23	28.5		4	E	RNP-RNPD coup./65-mer/sgRNASadCas9(mutRFP)-4
4	E	RNP-RNP unco./81-mer/ sgRNASadCas9(mutRFP)-1	Correction efficiency (%)	3	13.44	13.3	16.1		4	E	RNP-RNP unco./81-mer/ sgRNASadCas9(mutRFP)-1	*	0.0143
4	E	RNP-RNPD coup./81-mer/sgRNASadCas9(mutRFP)-1	Correction efficiency (%)	29.6	40.37	25.2	32.73		4	E	RNP-RNPD coup./81-mer/sgRNASadCas9(mutRFP)-1
4	E	RNP-RNP unco./81-mer/ sgRNASadCas9(mutRFP)-2	Correction efficiency (%)	4.5	14.96	13	14.91		4	E	RNP-RNP unco./81-mer/ sgRNASadCas9(mutRFP)-2	*	0.0143
4	E	RNP-RNPD coup./81-mer/sgRNASadCas9(mutRFP)-2	Correction efficiency (%)	26.3	41.3	30.5	31.86		4	E	RNP-RNPD coup./81-mer/sgRNASadCas9(mutRFP)-2
4	E	RNP-RNP unco./81-mer/ sgRNASadCas9(mutRFP)-3	Correction efficiency (%)	4.9	13.16	13.3	15.86		4	E	RNP-RNP unco./81-mer/ sgRNASadCas9(mutRFP)-3	*	0.0143
4	E	RNP-RNPD coup./81-mer/sgRNASadCas9(mutRFP)-3	Correction efficiency (%)	30.5	37.27	29.3	32.9		4	E	RNP-RNPD coup./81-mer/sgRNASadCas9(mutRFP)-3
4	E	RNP-RNP unco./81-mer/ sgRNASadCas9(mutRFP)-4	Correction efficiency (%)	4.4	13.77	12.4	14.87		4	E	RNP-RNP unco./81-mer/ sgRNASadCas9(mutRFP)-4	*	0.0143
4	E	RNP-RNPD coup./81-mer/sgRNASadCas9(mutRFP)-4	Correction efficiency (%)	28.8	38.9	28.2	32.61		4	E	RNP-RNPD coup./81-mer/sgRNASadCas9(mutRFP)-4
4	F	RNP unco. 65-mer	Correction efficiency (%)	0.328	0.577	0.303	-		4	F	RNP unco. 65-mer	*	0.05
4	F	RNPD coup. 65-mer	Correction efficiency (%)	7.925	8.502	7.273	-		4	F	RNPD coup. 65-mer
4	F	RNP-RNP unco. 65-mer	Correction efficiency (%)	0.389	0.402	0.421	-		4	F	RNP-RNP unco. 65-mer	*	0.05
4	F	RNP-RNPD coup. 65-mer	Correction efficiency (%)	9.365	7.05	8.582	-		4	F	RNP-RNPD coup. 65-mer
4	F	RNP unco. 81-mer	Correction efficiency (%)	1.414	1.478	1.973	-		4	F	RNP unco. 81-mer	*	0.05
4	F	RNPD coup. 81-mer	Correction efficiency (%)	5.138	6.452	8.657	-		4	F	RNPD coup. 81-mer
4	F	RNP-RNP unco. 81-mer	Correction efficiency (%)	1.257	1.527	1.98	-		4	F	RNP-RNP unco. 81-mer	*	0.05
4	F	RNP-RNPD coup. 81-mer	Correction efficiency (%)	9.165	10.337	7.383	-		4	F	RNP-RNPD coup. 81-mer
4	G	RNP-RNP no oligo no sgRNASaCas9	Correction efficiency (%)	0.01	0.01	0	0		4	G	RNP-RNP unco. no sgRNASaCas9 65-mer	*	0.0143
4	G	RNP-RNP unco. no sgRNASaCas9 65-mer	Correction efficiency (%)	1.75	2.46	1.44	1.8		4	G	RNP-RNPD coup. no sgRNASaCas9 65-mer
4	G	RNP-RNPD coup. no sgRNASaCas9 65-mer	Correction efficiency (%)	27.02	29.22	25.9	39		4	G	RNP-RNP unco. no sgRNASaCas9 65-mer	*	0.0143
4	G	RNP-RNPD coup. 65-mer	Correction efficiency (%)	27.68	31.27	24.13	36.4		4	G	RNP-RNPD coup. 65-mer
4	G	RNP-RNP no oligo no sgRNASaCas9	Correction efficiency (%)	0.01	0	0	0		4	G	RNP-RNPD coup. no sgRNASaCas9 65-mer	ns	0.5
4	G	RNP-RNP unco. no sgRNASaCas9 81-mer	Correction efficiency (%)	9.58	11.4	6.44	10.6		4	G	RNP-RNPD coup. 65-mer
4	G	RNP-RNPD coup. no sgRNASaCas9 81-mer	Correction efficiency (%)	31.56	35.52	31.99	42.5		4	G	RNP-RNP unco. no sgRNASaCas9 81-mer	*	0.0143
4	G	RNP-RNPD coup. 81-mer	Correction efficiency (%)	33.88	33.05	31.71	42.5		4	G	RNP-RNPD coup. no sgRNASaCas9 81-mer
									4	G	RNP-RNP unco. no sgRNASaCas9 81-mer	*	0.0143
									4	G	RNP-RNPD coup. 81-mer
									4	G	RNP-RNPD coup. no sgRNASaCas9 81-mer	ns	0.4857
									4	G	RNP-RNPD coup. 81-mer
