# Supplementary material for: Covalent linkage of the DNA repair template to the CRISPR-Cas9 nuclease enhances homology-directed repair
Source: eLife. 2018 May 29;7:e33761. doi: 10.7554/eLife.33761 (PMC6023611; doi:10.7554/eLife.33761)
Supplement: Figure 4—source data 2. [file elife-33761-fig4-data2.xlsx]

## Sheet: Figure 4-Figure Supplement 1
Figure	Panel	Sample name	Value	Numerical data
				biological replicate 1	biological replicate 2	biological replicate 3	biological replicate 4
Figure 4-Figure Supplement 1	A	RNP unco. 65-mer	Corrected cells (%)	0.35	0.1	0.45	0.6
Figure 4-Figure Supplement 1	A	RNPD coup. 65-mer	Corrected cells (%)	2.29	0.87	1.91	2.62
Figure 4-Figure Supplement 1	A	RNP unco. 81-mer	Corrected cells (%)	2.43	2.5	0.65	0.56
Figure 4-Figure Supplement 1	A	RNPD coup. 81-mer	Corrected cells (%)	3.99	4.15	2.5	2.93
Figure 4-Figure Supplement 1	B	RNP unco. 65-mer	Edited cells (%)	18.1	11.45	17.05	21.6
Figure 4-Figure Supplement 1	B	RNPD coup. 65-mer	Edited cells (%)	8	5.91	8.44	10.86
Figure 4-Figure Supplement 1	B	RNP unco. 81-mer	Edited cells (%)	17.6	18.4	15.5	14.41
Figure 4-Figure Supplement 1	B	RNPD coup. 81-mer	Edited cells (%)	13.2	14.7	11.95	12.68
Figure 4-Figure Supplement 1	C	RNP-RNP unco./65-mer/ sgRNASadCas9(mutRFP)-1	Corrected cells (%)	0.53	1.23	1.18	0.86
Figure 4-Figure Supplement 1	C	RNP-RNPD coup./65-mer/sgRNASadCas9(mutRFP)-1	Corrected cells (%)	3.72	4.4	4.65	6.68
Figure 4-Figure Supplement 1	C	RNP-RNP unco./65-mer/ sgRNASadCas9(mutRFP)-2	Corrected cells (%)	0.52	0.95	1.39	1.33
Figure 4-Figure Supplement 1	C	RNP-RNPD coup./65-mer/sgRNASadCas9(mutRFP)-2	Corrected cells (%)	3.95	2.71	5.51	6.34
Figure 4-Figure Supplement 1	C	RNP-RNP unco./65-mer/ sgRNASadCas9(mutRFP)-3	Corrected cells (%)	0.59	0.84	1.37	1.36
Figure 4-Figure Supplement 1	C	RNP-RNPD coup./65-mer/sgRNASadCas9(mutRFP)-3	Corrected cells (%)	4.08	2.73	4.83	6.92
Figure 4-Figure Supplement 1	C	RNP-RNP unco./65-mer/ sgRNASadCas9(mutRFP)-4	Corrected cells (%)	0.5	0.84	1.37	0.95
Figure 4-Figure Supplement 1	C	RNP-RNPD coup./65-mer/sgRNASadCas9(mutRFP)-4	Corrected cells (%)	4.12	2.67	6.21	5.53
Figure 4-Figure Supplement 1	C	RNP-RNP unco./81-mer/ sgRNASadCas9(mutRFP)-1	Corrected cells (%)	0.21	2.51	3.83	5.32
Figure 4-Figure Supplement 1	C	RNP-RNPD coup./81-mer/sgRNASadCas9(mutRFP)-1	Corrected cells (%)	1.35	4.41	2.81	5.56
Figure 4-Figure Supplement 1	C	RNP-RNP unco./81-mer/ sgRNASadCas9(mutRFP)-2	Corrected cells (%)	0.36	3.01	3.24	4.72
Figure 4-Figure Supplement 1	C	RNP-RNPD coup./81-mer/sgRNASadCas9(mutRFP)-2	Corrected cells (%)	1.49	4.05	4.67	5.11
Figure 4-Figure Supplement 1	C	RNP-RNP unco./81-mer/ sgRNASadCas9(mutRFP)-3	Corrected cells (%)	0.39	2.58	4.06	5.96
Figure 4-Figure Supplement 1	C	RNP-RNPD coup./81-mer/sgRNASadCas9(mutRFP)-3	Corrected cells (%)	2.08	3.91	4.58	6.88
Figure 4-Figure Supplement 1	C	RNP-RNP unco./81-mer/ sgRNASadCas9(mutRFP)-4	Corrected cells (%)	0.46	2.67	3.46	5.09
Figure 4-Figure Supplement 1	C	RNP-RNPD coup./81-mer/sgRNASadCas9(mutRFP)-4	Corrected cells (%)	1.73	3.33	3.58	6.16
Figure 4-Figure Supplement 1	D	RNP-RNP unco./65-mer/ sgRNASadCas9(mutRFP)-1	Edited cells (%)	16.7	29.7	22.01	35.02
Figure 4-Figure Supplement 1	D	RNP-RNPD coup./65-mer/sgRNASadCas9(mutRFP)-1	Edited cells (%)	13.1	15.6	15.58	21.64
Figure 4-Figure Supplement 1	D	RNP-RNP unco./65-mer/ sgRNASadCas9(mutRFP)-2	Edited cells (%)	16.7	25.6	24.32	32.79
Figure 4-Figure Supplement 1	D	RNP-RNPD coup./65-mer/sgRNASadCas9(mutRFP)-2	Edited cells (%)	11.8	11.5	17.74	20.4
Figure 4-Figure Supplement 1	D	RNP-RNP unco./65-mer/ sgRNASadCas9(mutRFP)-3	Edited cells (%)	17.5	20.8	24.6	33.52
Figure 4-Figure Supplement 1	D	RNP-RNPD coup./65-mer/sgRNASadCas9(mutRFP)-3	Edited cells (%)	12.6	11.4	15.96	23.48
Figure 4-Figure Supplement 1	D	RNP-RNP unco./65-mer/ sgRNASadCas9(mutRFP)-4	Edited cells (%)	15.9	23	24.9	27.31
Figure 4-Figure Supplement 1	D	RNP-RNPD coup./65-mer/sgRNASadCas9(mutRFP)-4	Edited cells (%)	12.8	10.7	20.54	19.39
Figure 4-Figure Supplement 1	D	RNP-RNP unco./81-mer/ sgRNASadCas9(mutRFP)-1	Edited cells (%)	6.2	19.5	28.9	33.05
Figure 4-Figure Supplement 1	D	RNP-RNPD coup./81-mer/sgRNASadCas9(mutRFP)-1	Edited cells (%)	3.8	11.8	11.1	16.99
Figure 4-Figure Supplement 1	D	RNP-RNP unco./81-mer/ sgRNASadCas9(mutRFP)-2	Edited cells (%)	7.3	21	25	31.65
Figure 4-Figure Supplement 1	D	RNP-RNPD coup./81-mer/sgRNASadCas9(mutRFP)-2	Edited cells (%)	4.9	10.7	15.3	16.04
Figure 4-Figure Supplement 1	D	RNP-RNP unco./81-mer/ sgRNASadCas9(mutRFP)-3	Edited cells (%)	7.3	20.5	30.6	37.59
Figure 4-Figure Supplement 1	D	RNP-RNPD coup./81-mer/sgRNASadCas9(mutRFP)-3	Edited cells (%)	6.1	11.3	15.6	20.91
Figure 4-Figure Supplement 1	D	RNP-RNP unco./81-mer/ sgRNASadCas9(mutRFP)-4	Edited cells (%)	9.7	20.3	27.8	34.22
Figure 4-Figure Supplement 1	D	RNP-RNPD coup./81-mer/sgRNASadCas9(mutRFP)-4	Edited cells (%)	5.3	9.4	12.7	18.89
Figure 4-Figure Supplement 1	E	RNP unco. 65-mer	Corrected cells (%)	0.008	0.022	0.009	-
Figure 4-Figure Supplement 1	E	RNPD coup. 65-mer	Corrected cells (%)	0.21	0.21	0.16	-
Figure 4-Figure Supplement 1	E	RNP-RNP unco. 65-mer	Corrected cells (%)	0.017	0.024	0.018	-
Figure 4-Figure Supplement 1	E	RNP-RNPD coup. 65-mer	Corrected cells (%)	0.28	0.38	0.23	-
Figure 4-Figure Supplement 1	E	RNP unco. 81-mer	Corrected cells (%)	0.069	0.057	0.099	-
Figure 4-Figure Supplement 1	E	RNPD coup. 81-mer	Corrected cells (%)	0.078	0.18	0.29	-
Figure 4-Figure Supplement 1	E	RNP-RNP unco. 81-mer	Corrected cells (%)	0.049	0.1	0.12	-
Figure 4-Figure Supplement 1	E	RNP-RNPD coup. 81-mer	Corrected cells (%)	0.45	0.43	0.22	-
Figure 4-Figure Supplement 1	F	RNP unco. 65-mer	Edited cells (%)	3.39	3.79	2.83	-
Figure 4-Figure Supplement 1	F	RNPD coup. 65-mer	Edited cells (%)	3.28	2.26	2.04	-
Figure 4-Figure Supplement 1	F	RNP-RNP unco. 65-mer	Edited cells (%)	5.19	5.94	4.26	-
Figure 4-Figure Supplement 1	F	RNP-RNPD coup. 65-mer	Edited cells (%)	3.55	5.01	2.45	-
Figure 4-Figure Supplement 1	F	RNP unco. 81-mer	Edited cells (%)	5.65	3.8	4.92	-
Figure 4-Figure Supplement 1	F	RNPD coup. 81-mer	Edited cells (%)	2.28	2.61	3.06	-
Figure 4-Figure Supplement 1	F	RNP-RNP unco. 81-mer	Edited cells (%)	4.69	6.45	5.94	-
Figure 4-Figure Supplement 1	F	RNP-RNPD coup. 81-mer	Edited cells (%)	5.3	3.73	2.76	-
