# Supplementary material for: Covalent linkage of the DNA repair template to the CRISPR-Cas9 nuclease enhances homology-directed repair
Source: eLife. 2018 May 29;7:e33761. doi: 10.7554/eLife.33761 (PMC6023611; doi:10.7554/eLife.33761)
Supplement: Figure 4—source data 3. [file elife-33761-fig4-data3.xlsx]

## Sheet: Figure 4-Figure Supplement 2
Figure	Panel	Sample name	Value	Numerical data					Figure	Panel	Sample name	Mann Whitney test p value summary	Mann Whitney test exact p value
				biological replicate 1	biological replicate 2	biological replicate 3	biological replicate 4
Figure 4-Figure Supplement 2	A	SpCas9 WT no oligo	Corrected cells (%)	0.000361	0.00155	0	0		Figure 4-Figure Supplement 2	C	SpCas9 WT 65-mer unco.	*	0.0143
Figure 4-Figure Supplement 2	A	SpCas9-SNAP no oligo	Corrected cells (%)	0.000175	0	0	0		Figure 4-Figure Supplement 2	C	SpCas9 WT 65-mer coup.
Figure 4-Figure Supplement 2	A	SpCas9 WT 65-mer unco.	Corrected cells (%)	0.36	0.28	0.32	0.21		Figure 4-Figure Supplement 2	C	SpCas9 WT 65-mer unco.	*	0.0143
Figure 4-Figure Supplement 2	A	SpCas9-SNAP 65-mer unco.	Corrected cells (%)	0.92	0.97	0.92	1.12		Figure 4-Figure Supplement 2	C	SpCas9-SNAP 65-mer coup.
Figure 4-Figure Supplement 2	A	SpCas9 WT 65-mer coup.	Corrected cells (%)	1.8	1.95	1.29	1.66		Figure 4-Figure Supplement 2	C	SpCas9 WT 65-mer coup.	*	0.0143
Figure 4-Figure Supplement 2	A	SpCas9-SNAP 65-mer coup.	Corrected cells (%)	4.77	6.93	3.55	4.24		Figure 4-Figure Supplement 2	C	SpCas9-SNAP 65-mer coup.
Figure 4-Figure Supplement 2	B	SpCas9 WT no oligo	Edited cells (%)	14.1902	16.3914	11.44	13.64
Figure 4-Figure Supplement 2	B	SpCas9-SNAP no oligo	Edited cells (%)	23.69	26.9898	26.64	29.84
Figure 4-Figure Supplement 2	B	SpCas9 WT 65-mer unco.	Edited cells (%)	13.8498	15.1698	14.76	12.65
Figure 4-Figure Supplement 2	B	SpCas9-SNAP 65-mer unco.	Edited cells (%)	24.6098	28.0598	24.76	27.76
Figure 4-Figure Supplement 2	B	SpCas9 WT 65-mer coup.	Edited cells (%)	15.1898	14.9398	13.63	16.5
Figure 4-Figure Supplement 2	B	SpCas9-SNAP 65-mer coup.	Edited cells (%)	12.5598	17.3198	13.09	15.08
Figure 4-Figure Supplement 2	C	SpCas9 WT no oligo	Correction efficiency (%)	0.002544	0.009456	0.03	0.03
Figure 4-Figure Supplement 2	C	SpCas9-SNAP no oligo	Correction efficiency (%)	0.000739	0	0.01	0.01
Figure 4-Figure Supplement 2	C	SpCas9 WT 65-mer unco.	Correction efficiency (%)	2.59931	1.84577	2.17	1.66
Figure 4-Figure Supplement 2	C	SpCas9-SNAP 65-mer unco.	Correction efficiency (%)	3.73834	3.4569	3.72	4.03
Figure 4-Figure Supplement 2	C	SpCas9 WT 65-mer coup.	Correction efficiency (%)	11.85	13.0524	9.46	10.06
Figure 4-Figure Supplement 2	C	SpCas9-SNAP 65-mer coup.	Correction efficiency (%)	37.9783	40.012	27.12	28.12
Figure 4-Figure Supplement 2	D	RNP-RNP no oligo no sgRNASaCas9	Corrected cells (%)	0	0	0	0
Figure 4-Figure Supplement 2	D	RNP-RNP unco. no sgRNASaCas9 65-mer	Corrected cells (%)	0.3	0.47	0.16	0.23
Figure 4-Figure Supplement 2	D	RNP-RNPD coup. no sgRNASaCas9 65-mer	Corrected cells (%)	3.87	3.07	2.01	2.49
Figure 4-Figure Supplement 2	D	RNP-RNPD coup. 65-mer	Corrected cells (%)	4.46	4.21	1.94	2.95
Figure 4-Figure Supplement 2	D	RNP-RNP no oligo no sgRNASaCas9	Corrected cells (%)	0	0	0	0
Figure 4-Figure Supplement 2	D	RNP-RNP unco. no sgRNASaCas9 81-mer	Corrected cells (%)	2.21	2.76	1.03	2.12
Figure 4-Figure Supplement 2	D	RNP-RNPD coup. no sgRNASaCas9 81-mer	Corrected cells (%)	5.42	5.87	3.57	4.61
Figure 4-Figure Supplement 2	D	RNP-RNPD coup. 81-mer	Corrected cells (%)	6.28	5.95	3.71	4.48
Figure 4-Figure Supplement 2	E	RNP-RNP no oligo no sgRNASaCas9	Edited cells (%)	16.2	17.5	11	10.86
Figure 4-Figure Supplement 2	E	RNP-RNP unco. no sgRNASaCas9 65-mer	Edited cells (%)	17.2	19.1	11.1	12.79
Figure 4-Figure Supplement 2	E	RNP-RNPD coup. no sgRNASaCas9 65-mer	Edited cells (%)	14.3	10.5	7.8	6.39
Figure 4-Figure Supplement 2	E	RNP-RNPD coup. 65-mer	Edited cells (%)	16.1	13.5	8	8.1
Figure 4-Figure Supplement 2	E	RNP-RNP no oligo no sgRNASaCas9	Edited cells (%)	15.9	16.3	9.9	16.16
Figure 4-Figure Supplement 2	E	RNP-RNP unco. no sgRNASaCas9 81-mer	Edited cells (%)	23.1	24.2	16	19.98
Figure 4-Figure Supplement 2	E	RNP-RNPD coup. no sgRNASaCas9 81-mer	Edited cells (%)	17.2	16.5	11.2	10.85
Figure 4-Figure Supplement 2	E	RNP-RNPD coup. 81-mer	Edited cells (%)	18.5	18	11.7	10.53
