# Supplementary material for: Covalent linkage of the DNA repair template to the CRISPR-Cas9 nuclease enhances homology-directed repair
Source: eLife. 2018 May 29;7:e33761. doi: 10.7554/eLife.33761 (PMC6023611; doi:10.7554/eLife.33761)
Supplement: Figure 5—source data 1. [file elife-33761-fig5-data1.xlsx]

## Sheet: Fig. 5
Figure	Panel	Sample name	Value	Numerical data					Figure	Panel	Sample name	Mann Whitney test p value summary	Mann Whitney test exact p value
				biological replicate 1	biological replicate 2	biological replicate 3	biological replicate 4
5	A	HBB RNP unco. 65-mer	Correction efficiency (%)	1.23	1.27	1.17	0.93		5	A	HBB RNP unco. 65-mer	*	0.0143
5	A	HBB RNPD coup. 65-mer	Correction efficiency (%)	23.47	18.15	19.77	16.87		5	A	HBB RNPD coup. 65-mer
5	B	Rosa26 RNP unco. 65-mer	Correction efficiency (%)	11.78	10.16	7.88	-		5	B	Rosa26 RNP unco. 65-mer	*	0.05
5	B	Rosa26 RNPD coup. 65-mer	Correction efficiency (%)	19.29	20.51	15.86	-		5	B	Rosa26 RNPD coup. 65-mer
5	C	Pcsk9 RNP unco. 65-mer	Correction efficiency (%)	2.89	4.14	5.34	-		5	C	Pcsk9 RNP unco. 65-mer	*	0.05
5	C	Pcsk9 RNPD coup. 65-mer	Correction efficiency (%)	19.17	23.92	26.41	-		5	C	Pcsk9 RNPD coup. 65-mer
