# Supplementary material for: Covalent linkage of the DNA repair template to the CRISPR-Cas9 nuclease enhances homology-directed repair
Source: eLife. 2018 May 29;7:e33761. doi: 10.7554/eLife.33761 (PMC6023611; doi:10.7554/eLife.33761)
Supplement: Figure 6—source data 1. [file elife-33761-fig6-data1.xlsx]

## Sheet: Fig. 6.
Figure	Panel	Sample name	Value	Numerical data					Figure	Panel	Sample name	Mann Whitney test p value summary	Mann Whitney test exact p value
				biological replicate 1	biological replicate 2	biological replicate 3	biological replicate 4
6	B	mutRFP 65-mer unco. (SpCas9 WT)	Correction efficiency (%)	8.39	4.83	2.54	-		6	B	mutRFP 65-mer unco. (SpCas9 WT)	*	0.05
6	B	mutRFP 65-mer coup. (SpCas9-SNAP)	Correction efficiency (%)	37.96	35.6	35.5	-		6	B	mutRFP 65-mer coup. (SpCas9-SNAP)
6	C	mutRFP NT	Edited alleles (%)	1.75	1.85	1.24	-		6	D	HBB 65-mer unco. (SpCas9 WT)	*	0.0143
6	C	mutRFP 65-mer unco. (SpCas9 WT)	Edited alleles (%)	16.27	11.95	14.43	-		6	D	HBB 65-mer coup. (SpCas9-SNAP)
6	C	mutRFP 65-mer coup. (SpCas9-SNAP)	Edited alleles (%)	14.83	13.41	12.05	-		6	E	EMX1 65-mer unco. (SpCas9 WT)	*	0.0143
6	C	Off target-1 NT	Edited alleles (%)	0.9	0.93	0.66	-		6	E	EMX1 65-mer coup. (SpCas9-SNAP)
6	C	Off target-1 65-mer unco. (SpCas9 WT)	Edited alleles (%)	0.95	0.88	0.89	-		6	F	CXCR4 65-mer unco. (SpCas9 WT)	*	0.0143
6	C	Off target-1 65-mer coup. (SpCas9-SNAP)	Edited alleles (%)	0.86	0.84	0.74	-		6	F	CXCR4 65-mer coup. (SpCas9-SNAP)
6	C	Off target-2 NT	Edited alleles (%)	0.8	0.88	0.64	-
6	C	Off target-2 65-mer unco. (SpCas9 WT)	Edited alleles (%)	0.82	0.8	0.8	-
6	C	Off target-2 65-mer coup. (SpCas9-SNAP)	Edited alleles (%)	0.9	0.8	0.79	-
6	C	Off target-3 NT	Edited alleles (%)	0.63	0.66	0.58	-
6	C	Off target-3 65-mer unco. (SpCas9 WT)	Edited alleles (%)	0.66	0.65	0.59	-
6	C	Off target-3 65-mer coup. (SpCas9-SNAP)	Edited alleles (%)	0.61	0.62	0.62	-
6	D	HBB 65-mer unco. (SpCas9 WT)	Correction efficiency (%)	1.87	1.63	2.49	0.89
6	D	HBB 65-mer coup. (SpCas9-SNAP)	Correction efficiency (%)	29.4	31.08	40.26	37.01
6	E	EMX1 65-mer unco. (SpCas9 WT)	Correction efficiency (%)	3.55	1.43	3.3	2.82
6	E	EMX1 65-mer coup. (SpCas9-SNAP)	Correction efficiency (%)	40.17	10.26	30.37	33.41
6	F	CXCR4 65-mer unco. (SpCas9 WT)	Correction efficiency (%)	1.17	1.61	0.71	1.97
6	F	CXCR4 65-mer coup. (SpCas9-SNAP)	Correction efficiency (%)	35.41	36.82	29.67	30.39
