# Supplementary material for: Covalent linkage of the DNA repair template to the CRISPR-Cas9 nuclease enhances homology-directed repair
Source: eLife journal article supplement (doi:10.7554/elife.33761), 2018-05-29
Supplement: supp [file elife_poa_e33761_Supplementary_File_2.pdf › elife_poa_e33761_Supplementary_File_2.pdf]

K562 HBB

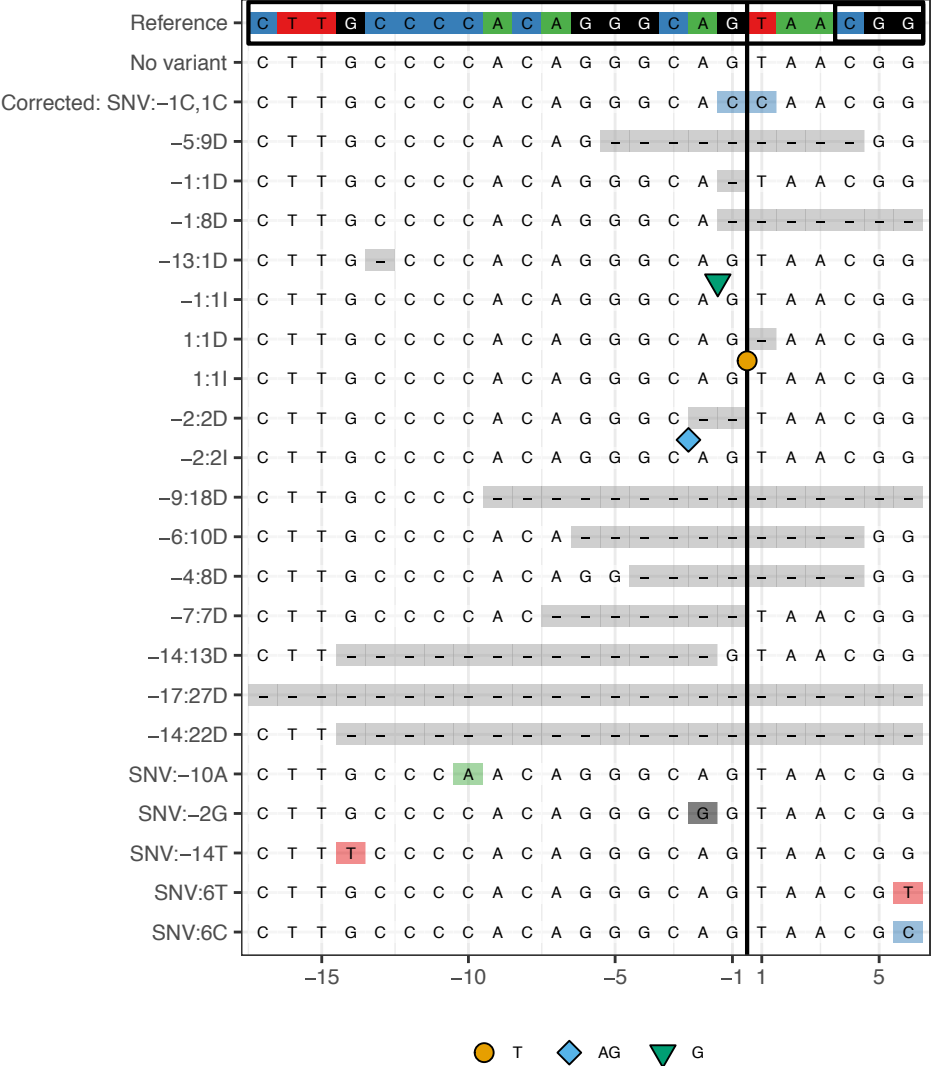

| 77449 | 82534              | 91608              | 121154 | 101436              | 119982              | 108964 | 110186               | 80251                | 77611 | 83511               | 88917               |
|-------|--------------------|--------------------|--------|---------------------|---------------------|--------|----------------------|----------------------|-------|---------------------|---------------------|
| 99.38 | 98.61              | 97.07              | 99.41  | 98.51               | 98.04               | 99.41  | 99.21                | 98.44                | 98.77 | 99.22               | 98.62               |
| 0     | 0.02               | 0.68               | 0      | 0.02                | 0.35                | 0      | 0.01                 | 0.31                 | 0     | 0.01                | 0.23                |
| 0     | 0.08               | 0.39               | 0      | 0.12                | 0.28                | 0      | 0.05                 | 0.1                  | 0.01  | 0.04                | 0.07                |
| 0     | 0.03               | 0.07               | 0      | 0.02                | 0.05                | 0      | 0.02                 | 0.03                 | 0     | 0                   | 0.03                |
| 0     | 0.02               | 0.07               | 0      | 0.02                | 0.04                | 0      | 0.01                 | 0.03                 | 0     | 0                   | 0.02                |
| 0.02  | 0.02               | 0.01               | 0.02   | 0.02                | 0.02                | 0.02   | 0.02                 | 0.02                 | 0.01  | 0.02                | 0.01                |
| 0     | 0.01               | 0.05               | 0      | 0.01                | 0.05                | 0      | 0                    | 0.03                 | 0     | 0.01                | 0.02                |
| 0     | 0.01               | 0.05               | 0      | 0.01                | 0.03                | 0      | 0                    | 0.03                 | 0     | 0.02                | 0.02                |
| 0     | 0.01               | 0.06               | 0      | 0.01                | 0.03                | 0      | 0                    | 0.04                 | 0     | 0                   | 0.01                |
| 0     | 0.01               | 0.07               | 0      | 0.01                | 0.03                | 0      | 0                    | 0.01                 | 0     | 0.02                | 0.01                |
| 0     | 0                  | 0.04               | 0      | 0.01                | 0.02                | 0      | 0                    | 0.02                 | 0     | 0                   | 0.01                |
| 0     | 0                  | 0.02               | 0      | 0.01                | 0.02                | 0      | 0                    | 0                    | 0     | 0                   | 0.01                |
| 0     | 0                  | 0.03               | 0      | 0.01                | 0.01                | 0      | 0                    | 0.01                 | 0     | 0                   | 0                   |
| 0     | 0                  | 0.02               | 0      | 0.01                | 0.01                | 0      | 0                    | 0                    | 0     | 0                   | 0                   |
| 0     | 0.01               | 0.03               | 0      | 0                   | 0.01                | 0      | 0                    | 0                    | 0     | 0                   | 0                   |
| 0     | 0                  | 0.03               | 0      | 0                   | 0.01                | 0      | 0                    | 0                    | 0     | 0                   | 0                   |
| 0     | 0                  | 0.02               | 0      | 0                   | 0                   | 0      | 0                    | 0                    | 0     | 0                   | 0.01                |
| 0     | 0                  | 0.02               | 0      | 0                   | 0                   | 0      | 0                    | 0                    | 0     | 0                   | 0                   |
| 0.01  | 0.05               | 0.03               | 0.02   | 0.06                | 0.04                | 0.02   | 0.03                 | 0.02                 | 0.06  | 0.03                | 0.04                |
| 0.02  | 0.05               | 0.01               | 0.02   | 0.04                | 0.03                | 0.02   | 0.01                 | 0.02                 | 0.06  | 0.02                | 0.02                |
| 0.02  | 0.03               | 0.02               | 0.01   | 0.03                | 0.02                | 0.01   | 0.03                 | 0.03                 | 0.05  | 0.02                | 0.02                |
| 0.01  | 0.05               | 0.01               | 0      | 0.04                | 0.01                | 0.01   | 0.01                 | 0.01                 | 0.05  | 0.01                | 0.02                |
| 0.01  | 0.05               | 0                  | 0      | 0.05                | 0                   | 0      | 0                    | 0.01                 | 0.08  | 0.01                | 0.01                |
| I NT  | I RNP unco. 65-mer | I RNP coup. 65-mer | II NT  | II RNP unco. 65-mer | II RNP coup. 65-mer | III NT | III RNP unco. 65-mer | III RNP coup. 65-mer | IV NT | IV RNP unco. 65-mer | IV RNP coup. 65-mer |

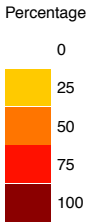

mESC Rosa26

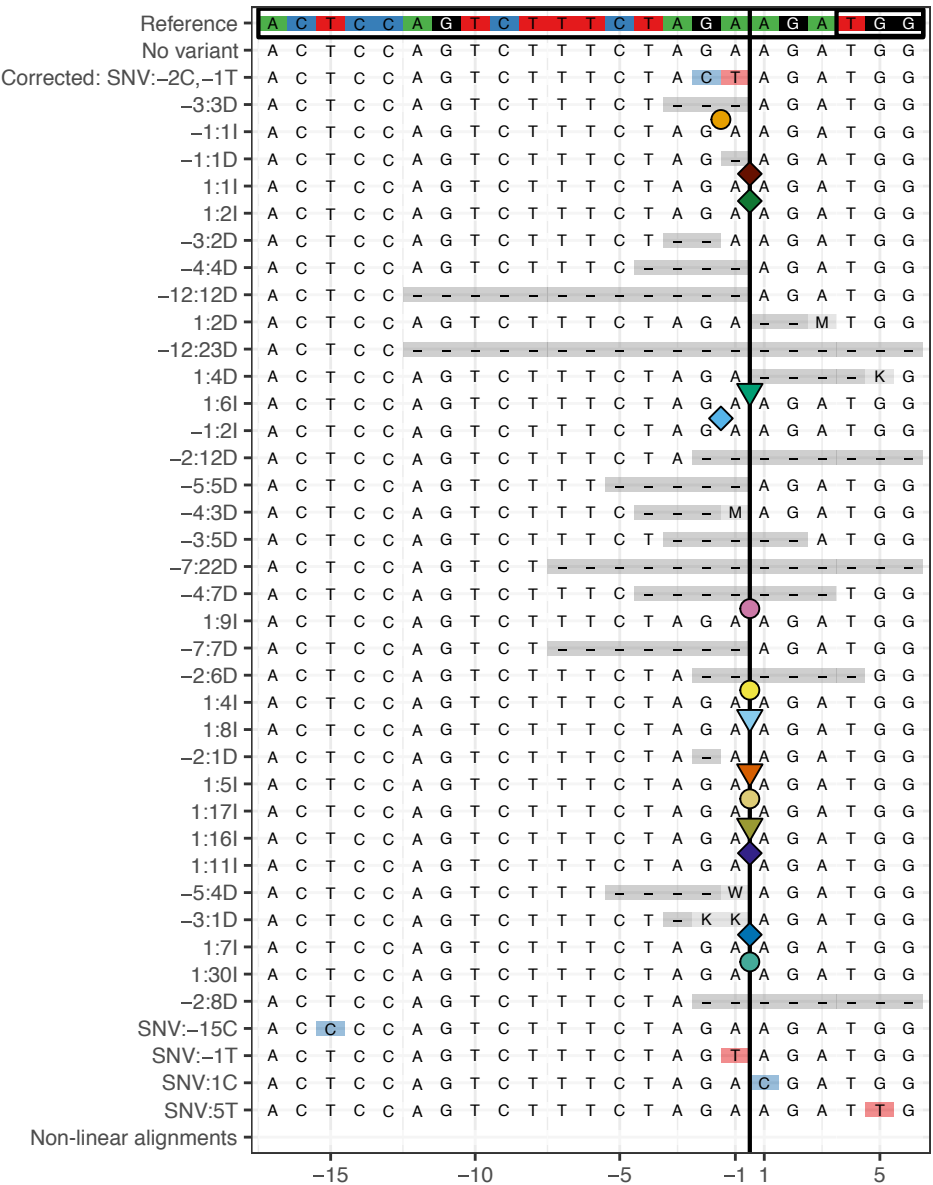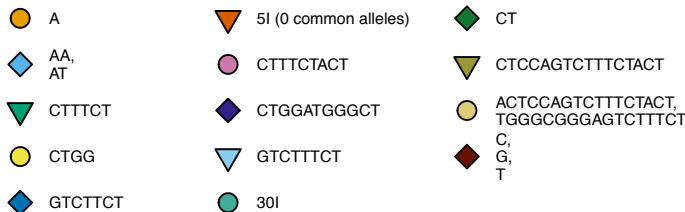

| 459580 | 561225 | 541210 | 483729 | 38307 | 56256 | 61631 | 62219 | 47604 | 59056 | 58419 | 61037 |
|--------|--------|--------|--------|-------|-------|-------|-------|-------|-------|-------|-------|
| 99.08  | 86.04  | 83.7   | 91.14  | 98.83 | 87.24 | 85.17 | 91    | 99.12 | 91.75 | 92.24 | 95.38 |
| 0.01   | 0      | 1.89   | 1.69   | 0.01  | 0.01  | 1.49  | 1.82  | 0     | 0.02  | 0.61  | 0.72  |
| 0.03   | 6.99   | 6.21   | 2.61   | 0.17  | 6.48  | 6.02  | 2.58  | 0.01  | 3.95  | 3.03  | 1.45  |
| 0.01   | 1.56   | 1.63   | 0.9    | 0.03  | 1.09  | 1.23  | 0.64  | 0.01  | 0.73  | 0.83  | 0.31  |
| 0.01   | 1.22   | 1.62   | 0.75   | 0.03  | 1.57  | 1.67  | 0.74  | 0     | 0.84  | 0.84  | 0.37  |
| 0      | 0.18   | 0.19   | 0.08   | 0     | 0.11  | 0.1   | 0.12  | 0     | 0.09  | 0.12  | 0.04  |
| 0      | 0.14   | 0.14   | 0.07   | 0     | 0.09  | 0.13  | 0.03  | 0     | 0.08  | 0.09  | 0.04  |
| 0      | 0.11   | 0.13   | 0.11   | 0.01  | 0.09  | 0.1   | 0.07  | 0     | 0.06  | 0.05  | 0.02  |
| 0      | 0.11   | 0.11   | 0.06   | 0     | 0.1   | 0.09  | 0.05  | 0     | 0.03  | 0.06  | 0.03  |
| 0      | 0.12   | 0.08   | 0.05   | 0.02  | 0.08  | 0.08  | 0.06  | 0     | 0.05  | 0.02  | 0.02  |
| 0      | 0.08   | 0.09   | 0.05   | 0     | 0.07  | 0.08  | 0.05  | 0     | 0.05  | 0.07  | 0.02  |
| 0      | 0.08   | 0.1    | 0.04   | 0     | 0.06  | 0.07  | 0.05  | 0     | 0.04  | 0.01  | 0.02  |
| 0      | 0.07   | 0.08   | 0.04   | 0     | 0.09  | 0.09  | 0.06  | 0     | 0.06  | 0.03  | 0.01  |
| 0      | 0.07   | 0.08   | 0.03   | 0     | 0.02  | 0.09  | 0.05  | 0     | 0.06  | 0.03  | 0.01  |
| 0      | 0.05   | 0.03   | 0.05   | 0     | 0.03  | 0.04  | 0.03  | 0     | 0.02  | 0     | 0     |
| 0      | 0.03   | 0.07   | 0.01   | 0.02  | 0.04  | 0.04  | 0.01  | 0     | 0.02  | 0.02  | 0     |
| 0      | 0.05   | 0.03   | 0.04   | 0     | 0.02  | 0.03  | 0.01  | 0     | 0.01  | 0.01  | 0.01  |
| 0      | 0.05   | 0.04   | 0.02   | 0     | 0.05  | 0.03  | 0     | 0     | 0.01  | 0.03  | 0     |
| 0      | 0.04   | 0.05   | 0.01   | 0     | 0.04  | 0.04  | 0.01  | 0     | 0.04  | 0.01  | 0     |
| 0      | 0.03   | 0.05   | 0.01   | 0     | 0.05  | 0.05  | 0.01  | 0     | 0.02  | 0     | 0.01  |
| 0      | 0.02   | 0.05   | 0.01   | 0     | 0.07  | 0.04  | 0.02  | 0     | 0.04  | 0.03  | 0.02  |
| 0      | 0.03   | 0.04   | 0.01   | 0     | 0     | 0.01  | 0.01  | 0     | 0     | 0     | 0.01  |
| 0      | 0.02   | 0.03   | 0.02   | 0     | 0.03  | 0.03  | 0.04  | 0     | 0.02  | 0.02  | 0     |
| 0      | 0.03   | 0.05   | 0.01   | 0     | 0.01  | 0.01  | 0     | 0     | 0.02  | 0     | 0     |
| 0      | 0.02   | 0.04   | 0.01   | 0     | 0.02  | 0.02  | 0.01  | 0     | 0.02  | 0.01  | 0.01  |
| 0      | 0.04   | 0.03   | 0.01   | 0     | 0.01  | 0.03  | 0.01  | 0     | 0.01  | 0.02  | 0.01  |
| 0      | 0.01   | 0.04   | 0      | 0.01  | 0.02  | 0.03  | 0.02  | 0     | 0.01  | 0.04  | 0     |
| 0      | 0.02   | 0.04   | 0.01   | 0     | 0.03  | 0.01  | 0     | 0     | 0.02  | 0     | 0.02  |
| 0      | 0.01   | 0.02   | 0.02   | 0     | 0     | 0.03  | 0.03  | 0     | 0     | 0.01  | 0.01  |
| 0      | 0.01   | 0.04   | 0.02   | 0     | 0.01  | 0.02  | 0.01  | 0     | 0.01  | 0     | 0.01  |
| 0      | 0.01   | 0.02   | 0.01   | 0     | 0.04  | 0.03  | 0.03  | 0     | 0.01  | 0.02  | 0     |
| 0      | 0.03   | 0.02   | 0      | 0     | 0.03  | 0.01  | 0.01  | 0     | 0.02  | 0     | 0.01  |
| 0      | 0.01   | 0.03   | 0      | 0     | 0.03  | 0.03  | 0.01  | 0     | 0.02  | 0.01  | 0     |
| 0      | 0.02   | 0.02   | 0      | 0     | 0.03  | 0.02  | 0     | 0     | 0.01  | 0.03  | 0     |
| 0      | 0.01   | 0.01   | 0.02   | 0     | 0     | 0.04  | 0     | 0     | 0     | 0     | 0.01  |
| 0      | 0      | 0.01   | 0      | 0     | 0.01  | 0.03  | 0.01  | 0     | 0     | 0.01  | 0     |
| 0.05   | 0.04   | 0.04   | 0.04   | 0.02  | 0.02  | 0.02  | 0.03  | 0.02  | 0.03  | 0.02  | 0.01  |
| 0.01   | 0.02   | 0.05   | 0.04   | 0     | 0     | 0.02  | 0.06  | 0.01  | 0.02  | 0.01  | 0.02  |
| 0.01   | 0.01   | 0.01   | 0      | 0.11  | 0.1   | 0.08  | 0.11  | 0.12  | 0.1   | 0.07  | 0.11  |
| 0.03   | 0.01   | 0.02   | 0.01   | 0.04  | 0.04  | 0.04  | 0.05  | 0.04  | 0.06  | 0.02  | 0.03  |
| 0      | 0.26   | 0.26   | 0.09   | 0.01  | 0.13  | 0.13  | 0.14  | 0     | 0.05  | 0.04  | 0.06  |

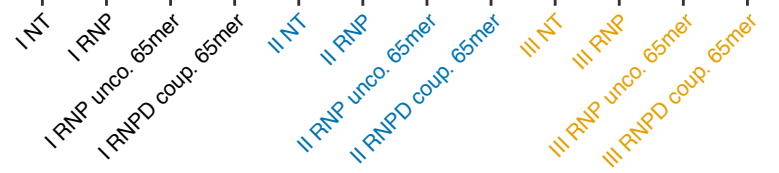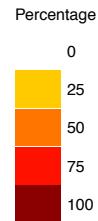

mESC Pcsk9

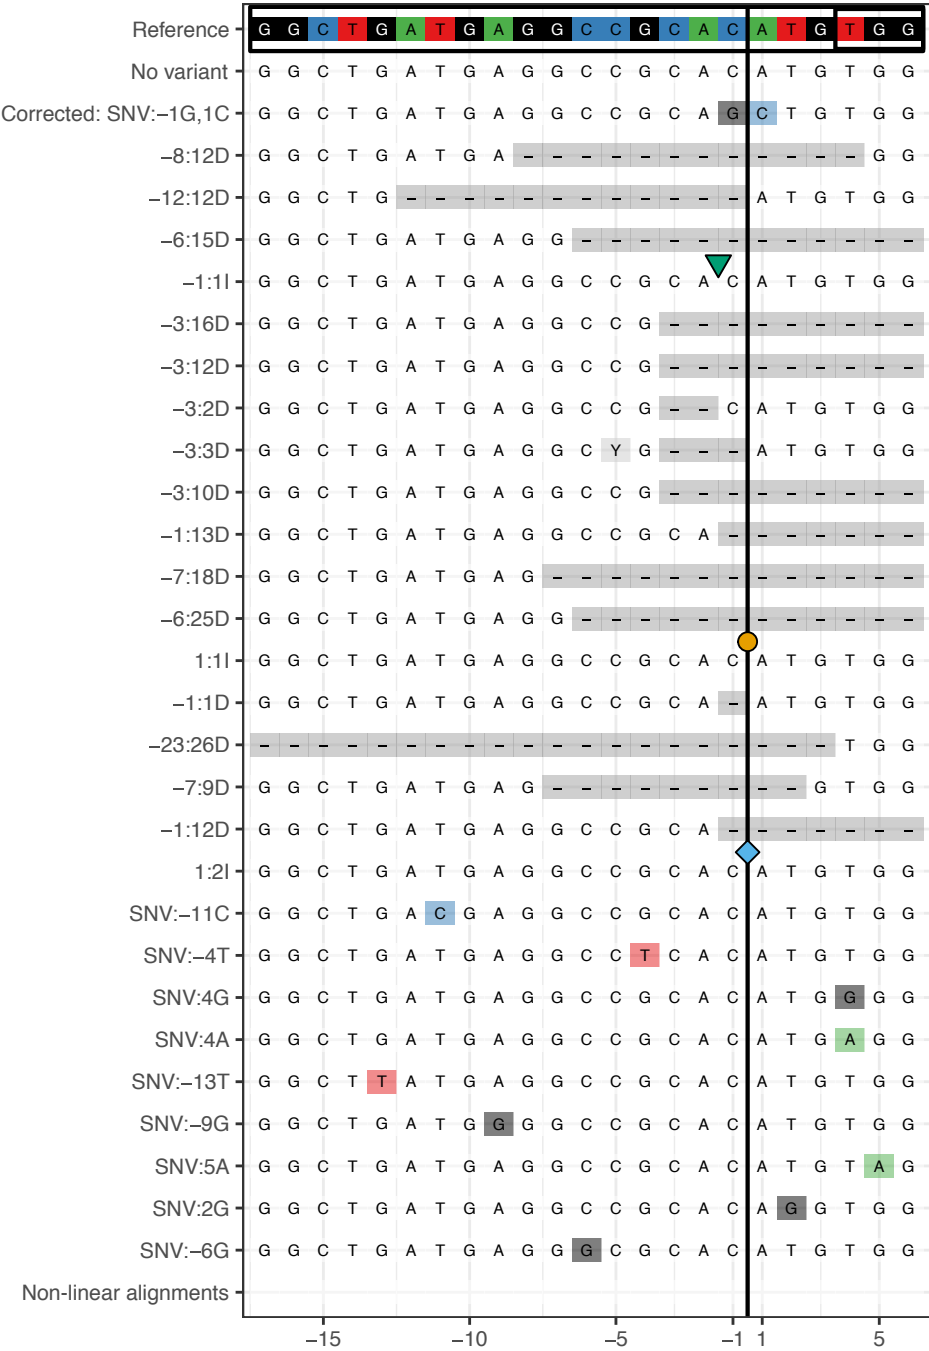

| 96271 | 113624 | 119906 | 133580 | 135714 | 126644 | 136466 | 118551 | 94057 |
|-------|--------|--------|--------|--------|--------|--------|--------|-------|
| 98.83 | 95.69  | 97.94  | 99.2   | 95.12  | 97.37  | 98.86  | 96.64  | 96.78 |
| 0     | 0.12   | 0.39   | 0      | 0.2    | 0.62   | 0      | 0.17   | 0.84  |
| 0     | 0.51   | 0.16   | 0      | 0.55   | 0.23   | 0      | 0.47   | 0.22  |
| 0     | 0.4    | 0.12   | 0      | 0.53   | 0.12   | 0      | 0.43   | 0.22  |
| 0     | 0.05   | 0.03   | 0      | 0.11   | 0.03   | 0      | 0.09   | 0.03  |
| 0     | 0.04   | 0.04   | 0      | 0.09   | 0.05   | 0      | 0.07   | 0.07  |
| 0     | 0.07   | 0.02   | 0      | 0.1    | 0.03   | 0      | 0.07   | 0.05  |
| 0     | 0.05   | 0.01   | 0      | 0.08   | 0.03   | 0      | 0.09   | 0.04  |
| 0     | 0.05   | 0.04   | 0      | 0.05   | 0.03   | 0      | 0.06   | 0.05  |
| 0     | 0.02   | 0.01   | 0      | 0.03   | 0.02   | 0      | 0.03   | 0.03  |
| 0     | 0.03   | 0.01   | 0      | 0.04   | 0.02   | 0      | 0.03   | 0.01  |
| 0     | 0.04   | 0.01   | 0      | 0.03   | 0.01   | 0      | 0.03   | 0.02  |
| 0     | 0.02   | 0      | 0      | 0.04   | 0.03   | 0      | 0.03   | 0     |
| 0     | 0.02   | 0      | 0      | 0.03   | 0      | 0      | 0.03   | 0.01  |
| 0     | 0.01   | 0      | 0      | 0.02   | 0.03   | 0      | 0.02   | 0.01  |
| 0     | 0.01   | 0.01   | 0      | 0.02   | 0.02   | 0      | 0.01   | 0.01  |
| 0     | 0.02   | 0.01   | 0      | 0.02   | 0.01   | 0      | 0.02   | 0     |
| 0     | 0.02   | 0      | 0      | 0.02   | 0      | 0      | 0      | 0     |
| 0     | 0.02   | 0      | 0      | 0.02   | 0      | 0      | 0.01   | 0     |
| 0     | 0      | 0      | 0      | 0.02   | 0.01   | 0      | 0      | 0     |
| 0.07  | 0.14   | 0.06   | 0.04   | 0.12   | 0.07   | 0.07   | 0.05   | 0.07  |
| 0.08  | 0.07   | 0.06   | 0.05   | 0.09   | 0.06   | 0.07   | 0.07   | 0.07  |
| 0.06  | 0.11   | 0.03   | 0.02   | 0.08   | 0.04   | 0.04   | 0.03   | 0.06  |
| 0.05  | 0.13   | 0.03   | 0.02   | 0.1    | 0.03   | 0.04   | 0.02   | 0.04  |
| 0.05  | 0.07   | 0.04   | 0.03   | 0.08   | 0.05   | 0.05   | 0.04   | 0.05  |
| 0.04  | 0.11   | 0.03   | 0.02   | 0.08   | 0.02   | 0.04   | 0.02   | 0.03  |
| 0.02  | 0.05   | 0.03   | 0.02   | 0.05   | 0.02   | 0.03   | 0.02   | 0.02  |
| 0.03  | 0.06   | 0.02   | 0.01   | 0.05   | 0.02   | 0.03   | 0.01   | 0.02  |
| 0.02  | 0.05   | 0.01   | 0.01   | 0.06   | 0.01   | 0.01   | 0.01   | 0.01  |
| 0     | 0.08   | 0.02   | 0      | 0.11   | 0.03   | 0      | 0.09   | 0.05  |

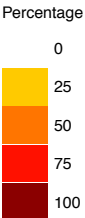

I NT  
I RNP unco. 65-mer  
I RNPd coup. 65-mer  
II NT  
II RNP unco. 65-mer  
II RNPd coup. 65-mer  
III NT  
III RNP unco. 65-mer  
III RNPd coup. 65-mer

Reporter mutRFP-On target

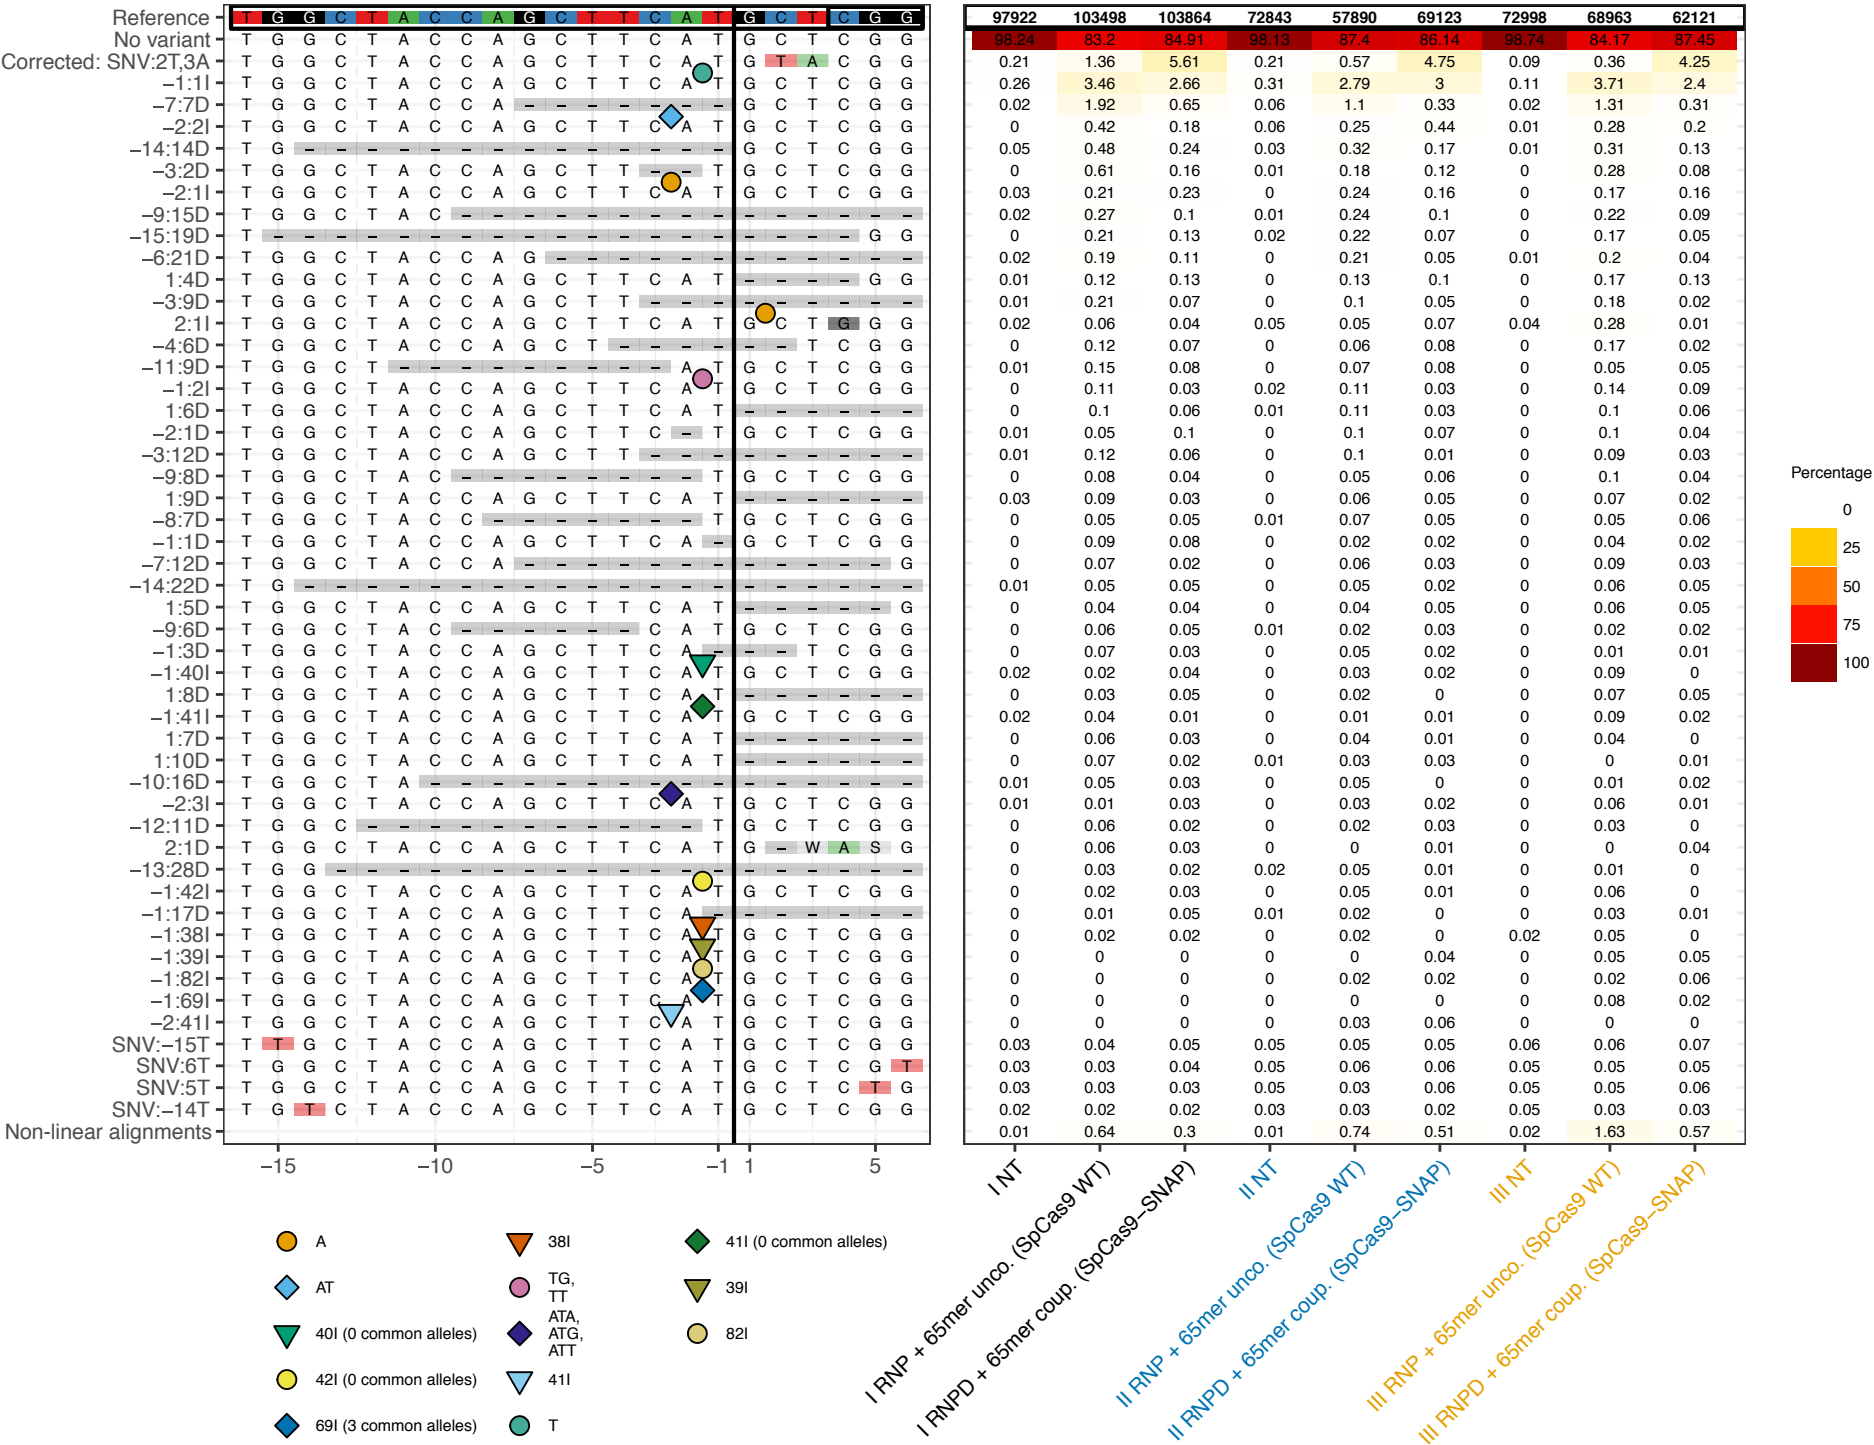

Reporter mutRFP-Off target-1

|            |                                                                                                                                                                                                 |   |   |   |   |     |   |   |   |   |   |   |   |   |    |                                                 |   |   |                                                 |   |   |
|------------|-------------------------------------------------------------------------------------------------------------------------------------------------------------------------------------------------|---|---|---|---|-----|---|---|---|---|---|---|---|---|----|-------------------------------------------------|---|---|-------------------------------------------------|---|---|
| Reference  | <div><div>G</div><div>G</div><div>G</div><div>C</div><div>T</div><div>A</div><div>C</div><div>C</div><div>A</div><div>G</div><div>C</div><div>T</div><div>C</div><div>A</div><div>T</div></div> |   |   |   |   |     |   |   |   |   |   |   |   |   |    | <div><div>G</div><div>C</div><div>T</div></div> |   |   | <div><div>G</div><div>G</div><div>G</div></div> |   |   |
| No variant | G                                                                                                                                                                                               | G | G | C | T | A   | C | C | A | G | C | T | C | A | T  | G                                               | C | T | G                                               | G | G |
| -13:1D     | G                                                                                                                                                                                               | G | - | C | T | A   | C | C | A | G | C | T | C | A | T  | G                                               | C | T | G                                               | G | G |
| SNV:-3A    | G                                                                                                                                                                                               | G | G | C | T | A   | C | C | A | G | C | T | A | A | T  | G                                               | C | T | G                                               | G | G |
| SNV:4T     | G                                                                                                                                                                                               | G | G | C | T | A   | C | C | A | G | C | T | C | A | T  | G                                               | C | T | T                                               | G | G |
| SNV:3C     | G                                                                                                                                                                                               | G | G | C | T | A   | C | C | A | G | C | T | C | A | T  | G                                               | C | C | G                                               | G | G |
|            | -15                                                                                                                                                                                             |   |   |   |   | -10 |   |   |   |   |   |   |   |   | -1 | 1                                               |   |   | 5                                               |   |   |

| 207040 | 143785 | 239316 | 145496 | 151787 | 307620 | 93622 | 107576 | 522638 |
|--------|--------|--------|--------|--------|--------|-------|--------|--------|
| 99.1   | 99.05  | 99.14  | 99.07  | 99.12  | 99.16  | 99.34 | 99.11  | 99.26  |
| 0.01   | 0.01   | 0.01   | 0.01   | 0.01   | 0.01   | 0.01  | 0.01   | 0.01   |
| 0.05   | 0.05   | 0.05   | 0.04   | 0.05   | 0.05   | 0.02  | 0.03   | 0.03   |
| 0.05   | 0.04   | 0.04   | 0.05   | 0.04   | 0.04   | 0.03  | 0.04   | 0.03   |
| 0.03   | 0.05   | 0.03   | 0.06   | 0.05   | 0.03   | 0.02  | 0.04   | 0.03   |

Percentage

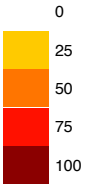

I NT  
I RNP + 65mer unco. (SpCas9 WT)  
I RNP + 65mer coup. (SpCas9-SNAP)  
II NT  
II RNP + 65mer unco. (SpCas9 WT)  
II RNP + 65mer coup. (SpCas9-SNAP)  
III NT  
III RNP + 65mer unco. (SpCas9 WT)  
III RNP + 65mer coup. (SpCas9-SNAP)

## Reporter mutRFP-Off target-2

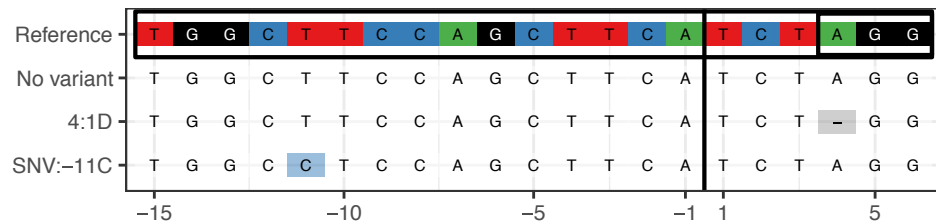

|                                     | 1030279 | 91076 | 153549 | 131221 | 324109 | 117155 | 104216 | 89321 | 106008 |
|-------------------------------------|---------|-------|--------|--------|--------|--------|--------|-------|--------|
| I NT                                | 99.2    | 99.18 | 99.1   | 99.12  | 99.2   | 99.2   | 99.36  | 99.2  | 99.21  |
| I RNP + 65mer unco. (SpCas9 WT)     | 0.01    | 0.01  | 0.01   | 0.01   | 0.01   | 0.01   | 0.01   | 0.01  | 0.02   |
| I RNP + 65mer coup. (SpCas9-SNAP)   | 0.03    | 0.02  | 0.04   | 0.03   | 0.03   | 0.02   | 0.03   | 0.05  | 0.03   |
| II NT                               |         |       |        |        |        |        |        |       |        |
| II RNP + 65mer unco. (SpCas9 WT)    |         |       |        |        |        |        |        |       |        |
| II RNP + 65mer coup. (SpCas9-SNAP)  |         |       |        |        |        |        |        |       |        |
| III NT                              |         |       |        |        |        |        |        |       |        |
| III RNP + 65mer unco. (SpCas9 WT)   |         |       |        |        |        |        |        |       |        |
| III RNP + 65mer coup. (SpCas9-SNAP) |         |       |        |        |        |        |        |       |        |

Percentage

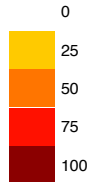

### Reporter mutRFP-Off target-3

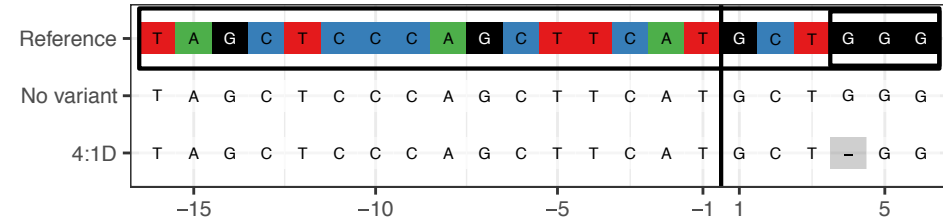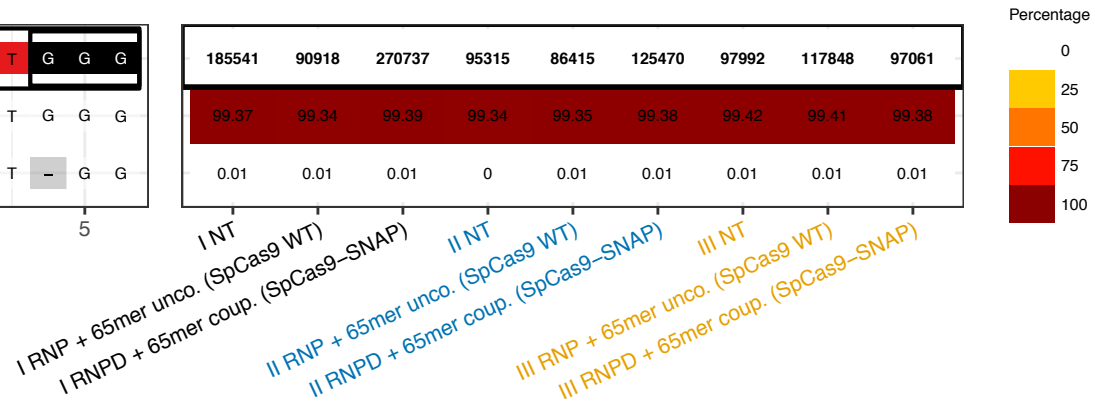





HEK293T EMX1

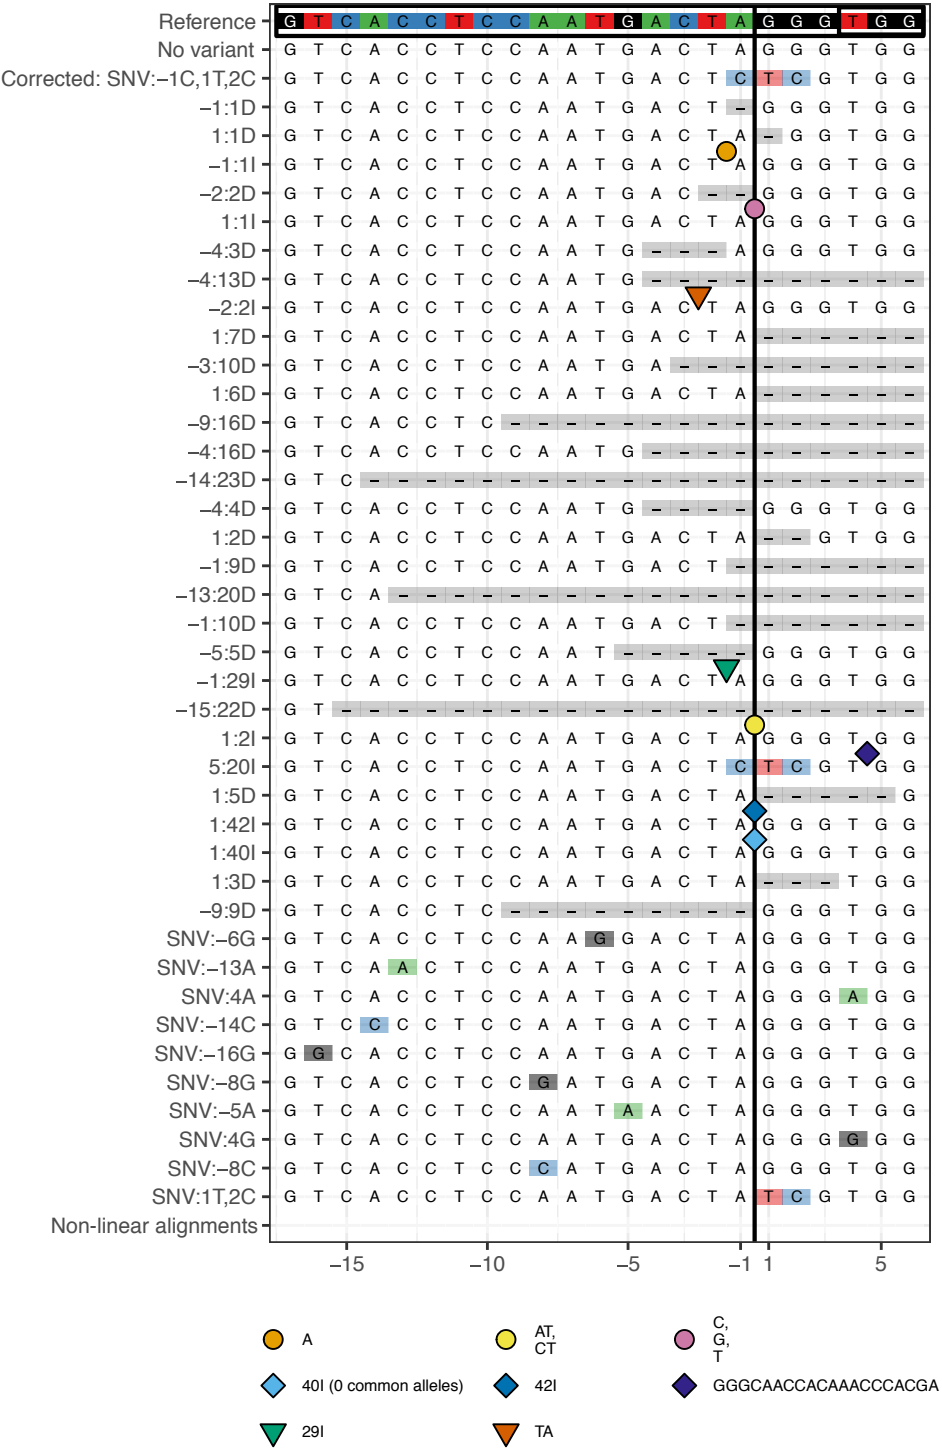

| 118296 | 121356                          | 111980                             | 105674 | 110384                           | 110060                              | 102715 | 120232                            | 108771                               | 99240 | 89460                           | 90279                              |
|--------|---------------------------------|------------------------------------|--------|----------------------------------|-------------------------------------|--------|-----------------------------------|--------------------------------------|-------|---------------------------------|------------------------------------|
| 99.26  | 96.98                           | 88.46                              | 99.22  | 96.57                            | 97.97                               | 99.37  | 98.53                             | 97.14                                | 99.31 | 97.88                           | 96.74                              |
| 0      | 0.1                             | 4.48                               | 0      | 0.05                             | 0.19                                | 0      | 0.05                              | 0.85                                 | 0     | 0.06                            | 1.06                               |
| 0      | 0.15                            | 0.72                               | 0      | 0.12                             | 0.11                                | 0      | 0.05                              | 0.2                                  | 0     | 0.07                            | 0.24                               |
| 0.01   | 0.14                            | 0.62                               | 0      | 0.11                             | 0.06                                | 0      | 0.05                              | 0.17                                 | 0     | 0.04                            | 0.21                               |
| 0      | 0.05                            | 0.34                               | 0      | 0.07                             | 0.04                                | 0      | 0.01                              | 0.06                                 | 0     | 0.02                            | 0.07                               |
| 0      | 0.03                            | 0.29                               | 0      | 0.01                             | 0.04                                | 0      | 0.01                              | 0.05                                 | 0     | 0                               | 0.03                               |
| 0      | 0.03                            | 0.22                               | 0      | 0.02                             | 0.06                                | 0      | 0                                 | 0.04                                 | 0     | 0.01                            | 0.04                               |
| 0      | 0.03                            | 0.17                               | 0      | 0.02                             | 0.01                                | 0      | 0.02                              | 0.04                                 | 0     | 0.01                            | 0.01                               |
| 0      | 0.06                            | 0.1                                | 0      | 0.03                             | 0.01                                | 0      | 0.04                              | 0.01                                 | 0     | 0.02                            | 0.04                               |
| 0      | 0.04                            | 0.12                               | 0      | 0.05                             | 0.01                                | 0      | 0                                 | 0.02                                 | 0     | 0.01                            | 0.04                               |
| 0      | 0.07                            | 0.1                                | 0      | 0.02                             | 0.02                                | 0      | 0.01                              | 0.03                                 | 0     | 0                               | 0.04                               |
| 0      | 0.03                            | 0.08                               | 0      | 0.04                             | 0.02                                | 0      | 0.02                              | 0.01                                 | 0     | 0.05                            | 0.02                               |
| 0      | 0.02                            | 0.06                               | 0      | 0.01                             | 0.02                                | 0      | 0.01                              | 0.03                                 | 0     | 0                               | 0.03                               |
| 0      | 0.04                            | 0.05                               | 0      | 0.02                             | 0.01                                | 0      | 0.01                              | 0.02                                 | 0     | 0.01                            | 0.02                               |
| 0      | 0.04                            | 0.03                               | 0      | 0.01                             | 0                                   | 0      | 0.02                              | 0.02                                 | 0     | 0.02                            | 0.01                               |
| 0      | 0.04                            | 0.04                               | 0      | 0.02                             | 0.01                                | 0      | 0.02                              | 0                                    | 0     | 0.01                            | 0.01                               |
| 0      | 0.01                            | 0.07                               | 0      | 0.01                             | 0.01                                | 0      | 0.01                              | 0.01                                 | 0     | 0                               | 0.01                               |
| 0      | 0.02                            | 0.04                               | 0      | 0.01                             | 0                                   | 0      | 0.02                              | 0.01                                 | 0     | 0.01                            | 0.01                               |
| 0      | 0.01                            | 0.08                               | 0      | 0                                | 0                                   | 0      | 0.01                              | 0                                    | 0     | 0.01                            | 0.02                               |
| 0      | 0.03                            | 0.05                               | 0      | 0                                | 0                                   | 0      | 0.01                              | 0.01                                 | 0     | 0.02                            | 0.01                               |
| 0      | 0.03                            | 0.04                               | 0      | 0.02                             | 0.01                                | 0      | 0                                 | 0                                    | 0     | 0.01                            | 0.01                               |
| 0      | 0                               | 0.06                               | 0      | 0.02                             | 0                                   | 0      | 0.01                              | 0.01                                 | 0     | 0.01                            | 0                                  |
| 0      | 0                               | 0.07                               | 0      | 0.01                             | 0.01                                | 0      | 0                                 | 0                                    | 0     | 0                               | 0.01                               |
| 0      | 0.02                            | 0.03                               | 0      | 0.02                             | 0                                   | 0      | 0                                 | 0                                    | 0     | 0                               | 0.01                               |
| 0      | 0.01                            | 0.04                               | 0      | 0.01                             | 0.01                                | 0      | 0                                 | 0                                    | 0     | 0                               | 0                                  |
| 0      | 0                               | 0.03                               | 0      | 0                                | 0.01                                | 0      | 0                                 | 0.01                                 | 0     | 0                               | 0.02                               |
| 0      | 0.01                            | 0.04                               | 0      | 0                                | 0                                   | 0      | 0                                 | 0.01                                 | 0     | 0                               | 0.01                               |
| 0      | 0.01                            | 0.03                               | 0      | 0.01                             | 0.01                                | 0      | 0                                 | 0                                    | 0     | 0                               | 0                                  |
| 0      | 0                               | 0.03                               | 0      | 0                                | 0                                   | 0      | 0                                 | 0.01                                 | 0     | 0                               | 0.01                               |
| 0      | 0.01                            | 0.03                               | 0      | 0                                | 0                                   | 0      | 0                                 | 0                                    | 0     | 0                               | 0.01                               |
| 0.05   | 0.06                            | 0.04                               | 0.04   | 0.09                             | 0.04                                | 0.03   | 0.04                              | 0.04                                 | 0.04  | 0.08                            | 0.04                               |
| 0.03   | 0.03                            | 0.03                               | 0.05   | 0.05                             | 0.03                                | 0.02   | 0.04                              | 0.02                                 | 0.02  | 0.05                            | 0.02                               |
| 0.01   | 0.02                            | 0.01                               | 0.02   | 0.1                              | 0.03                                | 0.02   | 0.02                              | 0.02                                 | 0.02  | 0.1                             | 0.03                               |
| 0.03   | 0.03                            | 0.03                               | 0.04   | 0.06                             | 0.03                                | 0.02   | 0.02                              | 0.02                                 | 0.02  | 0.05                            | 0.02                               |
| 0.02   | 0.02                            | 0.05                               | 0.03   | 0.07                             | 0.04                                | 0.01   | 0.02                              | 0.02                                 | 0.03  | 0.04                            | 0.02                               |
| 0.03   | 0.02                            | 0.02                               | 0.03   | 0.07                             | 0.02                                | 0.03   | 0.02                              | 0.02                                 | 0.02  | 0.05                            | 0.03                               |
| 0.02   | 0.02                            | 0.01                               | 0.02   | 0.08                             | 0.02                                | 0.02   | 0.01                              | 0.02                                 | 0.02  | 0.05                            | 0.02                               |
| 0.02   | 0.01                            | 0.02                               | 0.02   | 0.07                             | 0.01                                | 0.01   | 0.01                              | 0.01                                 | 0.02  | 0.06                            | 0.02                               |
| 0.01   | 0.01                            | 0.01                               | 0.01   | 0.05                             | 0.01                                | 0.01   | 0                                 | 0                                    | 0.01  | 0.02                            | 0.01                               |
| 0      | 0                               | 0.05                               | 0      | 0                                | 0.01                                | 0      | 0                                 | 0.01                                 | 0     | 0                               | 0.01                               |
| 0      | 0.23                            | 0.38                               | 0      | 0.19                             | 0.14                                | 0      | 0.05                              | 0.06                                 | 0     | 0.1                             | 0.08                               |
| I NT   | I RNP + 65mer unco. (SpCas9 WT) | I RNPd + 65mer coup. (SpCas9-SNAP) | II NT  | II RNP + 65mer unco. (SpCas9 WT) | II RNPd + 65mer coup. (SpCas9-SNAP) | III NT | III RNP + 65mer unco. (SpCas9 WT) | III RNPd + 65mer coup. (SpCas9-SNAP) | IV NT | IV RNP unco. 65-mer (SpCas9 WT) | IV RNPd coup. 65-mer (SpCas9-SNAP) |

HEK293T CXCR4

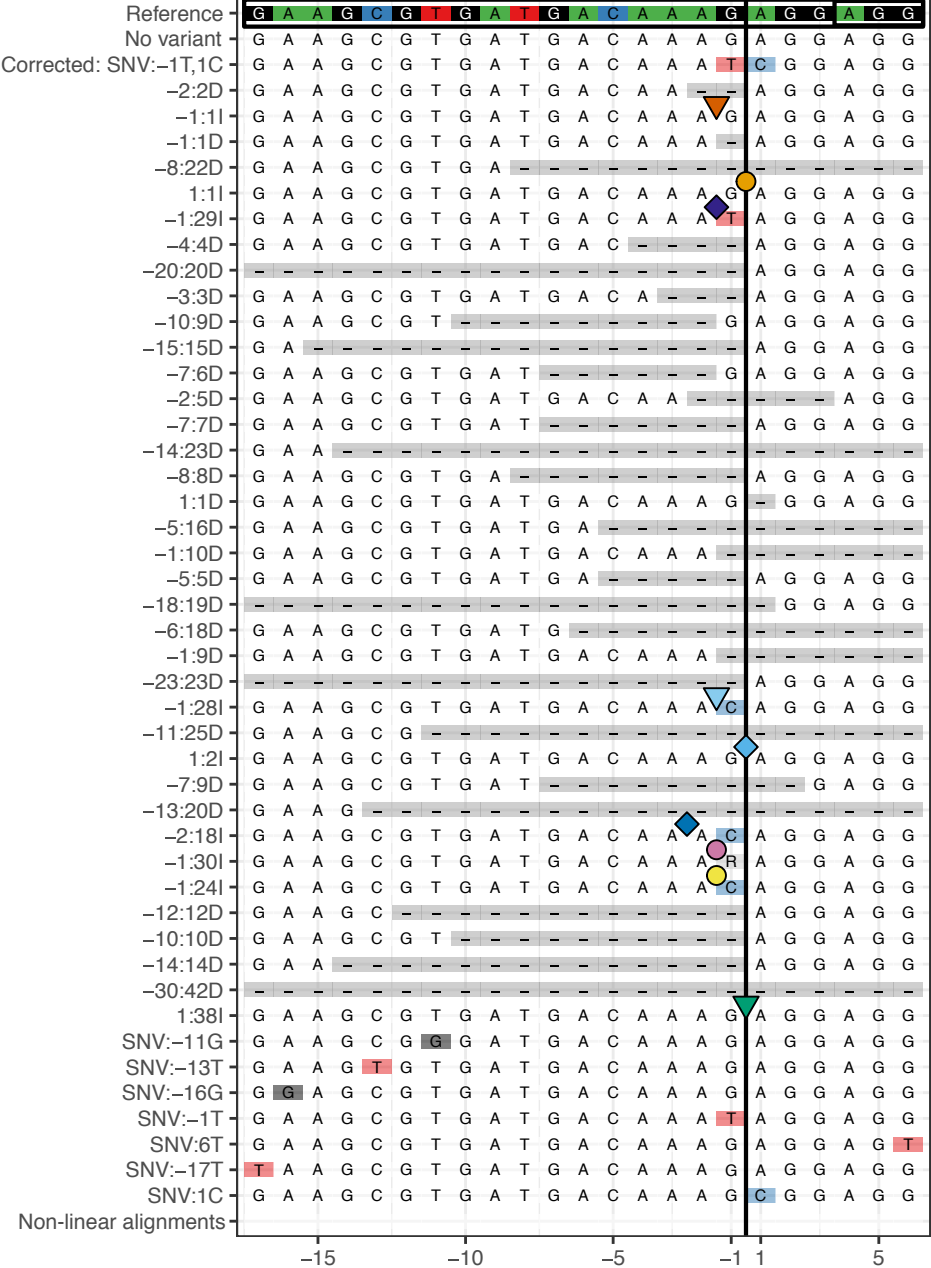

| 118537 | 165325 | 164829 | 129676 | 136548 | 154894 | 124161 | 124012 | 128916 | 146760 | 132906 | 124723 |
|--------|--------|--------|--------|--------|--------|--------|--------|--------|--------|--------|--------|
| 99.28  | 96.05  | 85.96  | 99.28  | 94.86  | 84.64  | 99.39  | 98.02  | 96.12  | 99.3   | 97.36  | 96.57  |
| 0.01   | 0.04   | 4.81   | 0.01   | 0.08   | 5.47   | 0      | 0.01   | 1.13   | 0      | 0.05   | 1.04   |
| 0      | 0.74   | 2.4    | 0      | 0.93   | 2.49   | 0      | 0.37   | 0.69   | 0      | 0.35   | 0.58   |
| 0      | 0.08   | 0.25   | 0      | 0.1    | 0.29   | 0      | 0.01   | 0.07   | 0      | 0.03   | 0.04   |
| 0      | 0.05   | 0.21   | 0      | 0.05   | 0.28   | 0      | 0.03   | 0.08   | 0      | 0.04   | 0.04   |
| 0      | 0.12   | 0.14   | 0      | 0.09   | 0.16   | 0      | 0.04   | 0.04   | 0      | 0.07   | 0.03   |
| 0      | 0.05   | 0.21   | 0      | 0.09   | 0.2    | 0      | 0.01   | 0.06   | 0      | 0.01   | 0.02   |
| 0      | 0      | 0.2    | 0      | 0      | 0.25   | 0      | 0      | 0.07   | 0      | 0      | 0.06   |
| 0      | 0.04   | 0.16   | 0      | 0.04   | 0.17   | 0      | 0.02   | 0.05   | 0      | 0.01   | 0.03   |
| 0      | 0.07   | 0.12   | 0      | 0.08   | 0.1    | 0      | 0.05   | 0.02   | 0      | 0.04   | 0.03   |
| 0      | 0.03   | 0.15   | 0      | 0.03   | 0.14   | 0      | 0.03   | 0.05   | 0      | 0.03   | 0.04   |
| 0      | 0.06   | 0.15   | 0      | 0.08   | 0.1    | 0      | 0.02   | 0.03   | 0      | 0.03   | 0.02   |
| 0      | 0.07   | 0.09   | 0      | 0.03   | 0.09   | 0      | 0.02   | 0.02   | 0      | 0.04   | 0.02   |
| 0      | 0.04   | 0.12   | 0      | 0.07   | 0.07   | 0      | 0.02   | 0.01   | 0      | 0      | 0.02   |
| 0      | 0.07   | 0.07   | 0      | 0.02   | 0.1    | 0      | 0.04   | 0.01   | 0      | 0.03   | 0.02   |
| 0      | 0.04   | 0.08   | 0      | 0.03   | 0.1    | 0      | 0      | 0      | 0      | 0.02   | 0.01   |
| 0      | 0.03   | 0.04   | 0      | 0.05   | 0.05   | 0      | 0.02   | 0.01   | 0      | 0      | 0.02   |
| 0      | 0.02   | 0.07   | 0      | 0.06   | 0.04   | 0      | 0.01   | 0.01   | 0      | 0      | 0.01   |
| 0      | 0.02   | 0.04   | 0      | 0.01   | 0.08   | 0      | 0.01   | 0.02   | 0.01   | 0.01   | 0.02   |
| 0      | 0.01   | 0.06   | 0      | 0.04   | 0.06   | 0      | 0.01   | 0.01   | 0      | 0.01   | 0.01   |
| 0      | 0.03   | 0.05   | 0      | 0.01   | 0.07   | 0      | 0      | 0.02   | 0      | 0.01   | 0      |
| 0      | 0.01   | 0.06   | 0      | 0.03   | 0.06   | 0      | 0      | 0.02   | 0      | 0      | 0      |
| 0      | 0.04   | 0.05   | 0      | 0.02   | 0.04   | 0      | 0.01   | 0.01   | 0      | 0.01   | 0      |
| 0      | 0.01   | 0.04   | 0      | 0.02   | 0.03   | 0      | 0.02   | 0.02   | 0      | 0.02   | 0.01   |
| 0      | 0.01   | 0.07   | 0      | 0.03   | 0.04   | 0      | 0      | 0.01   | 0      | 0      | 0.01   |
| 0      | 0.02   | 0.06   | 0      | 0.01   | 0.02   | 0      | 0.01   | 0      | 0      | 0.02   | 0      |
| 0      | 0      | 0.07   | 0      | 0      | 0.06   | 0      | 0      | 0.01   | 0      | 0      | 0.02   |
| 0      | 0.03   | 0.05   | 0      | 0.01   | 0.03   | 0      | 0      | 0      | 0      | 0.02   | 0      |
| 0      | 0.01   | 0.04   | 0      | 0.03   | 0.05   | 0      | 0      | 0      | 0      | 0      | 0.02   |
| 0      | 0.02   | 0.04   | 0      | 0.01   | 0.04   | 0      | 0      | 0.01   | 0      | 0.02   | 0      |
| 0      | 0.01   | 0.01   | 0      | 0.03   | 0.06   | 0      | 0.01   | 0.01   | 0      | 0.01   | 0      |
| 0      | 0      | 0.06   | 0      | 0      | 0.03   | 0      | 0      | 0.02   | 0      | 0      | 0.01   |
| 0      | 0      | 0.04   | 0      | 0      | 0.06   | 0      | 0      | 0.01   | 0      | 0      | 0.01   |
| 0      | 0      | 0.04   | 0      | 0.01   | 0.02   | 0      | 0      | 0.03   | 0      | 0      | 0.01   |
| 0      | 0      | 0.02   | 0      | 0.02   | 0.04   | 0      | 0      | 0.01   | 0      | 0      | 0      |
| 0      | 0      | 0.03   | 0      | 0.01   | 0.05   | 0      | 0      | 0      | 0      | 0      | 0      |
| 0      | 0.01   | 0.04   | 0      | 0      | 0.02   | 0      | 0      | 0.01   | 0      | 0      | 0.01   |
| 0      | 0      | 0.04   | 0      | 0.03   | 0.02   | 0      | 0      | 0      | 0      | 0      | 0      |
| 0      | 0.02   | 0.01   | 0      | 0      | 0.05   | 0      | 0      | 0      | 0      | 0      | 0      |
| 0.04   | 0.03   | 0.03   | 0.05   | 0.13   | 0.05   | 0.03   | 0.03   | 0.04   | 0.04   | 0.12   | 0.04   |
| 0.03   | 0.03   | 0.03   | 0.04   | 0.06   | 0.02   | 0.03   | 0.02   | 0.01   | 0.03   | 0.05   | 0.04   |
| 0.03   | 0.03   | 0.03   | 0.02   | 0.06   | 0.03   | 0.02   | 0.03   | 0.03   | 0.03   | 0.06   | 0.03   |
| 0.01   | 0.01   | 0.06   | 0.02   | 0.03   | 0.06   | 0.01   | 0.01   | 0.04   | 0.01   | 0.02   | 0.02   |
| 0.02   | 0.02   | 0.02   | 0.01   | 0.05   | 0.02   | 0.02   | 0.01   | 0.02   | 0.02   | 0.05   | 0.02   |
| 0.02   | 0.01   | 0.02   | 0.02   | 0.05   | 0.02   | 0.01   | 0.02   | 0.01   | 0.02   | 0.05   | 0.02   |
| 0.01   | 0.01   | 0.06   | 0.01   | 0.03   | 0.04   | 0      | 0.01   | 0.02   | 0.01   | 0.02   | 0.02   |
| 0      | 0.22   | 0.44   | 0      | 0.31   | 0.5    | 0      | 0.06   | 0.08   | 0      | 0.07   | 0.02   |

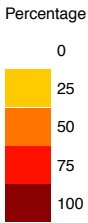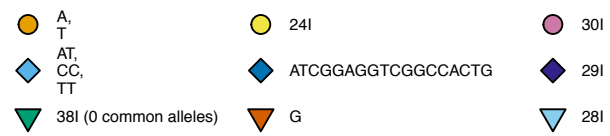

I RNP + 65mer unco. (SpCas9 WT)  
I RNP + 65mer coup. (SpCas9-SNAP)  
II RNP + 65mer unco. (SpCas9 WT)  
II RNP + 65mer coup. (SpCas9-SNAP)  
III RNP + 65mer unco. (SpCas9 WT)  
III RNP + 65mer coup. (SpCas9-SNAP)  
IV RNP unco. 65-mer (SpCas9 WT)  
IV RNP coup. 65-mer (SpCas9-SNAP)
