# Supplementary material for: Covalent linkage of the DNA repair template to the CRISPR-Cas9 nuclease enhances homology-directed repair
Source: eLife. 2018 May 29;7:e33761. doi: 10.7554/eLife.33761 (PMC6023611; doi:10.7554/eLife.33761)
Supplement: Supplementary file 3. — Variants are labeled as in Supplementary file 2. [file elife-33761-supp3.xlsx]

## Sheet: K562_HBB
Sample	I.NT	I.RNP.unco..65.mer	I.RNPD.coup..65.mer	II.NT	II.RNP.unco..65.mer	II..RNPD.coup..65.mer	III.NT	III.RNP.unco..65.mer	III.RNPD.coup..65.mer	IV..NT	IV.RNP.unco..65.mer	IV.RNPD.coup..65.mer
no variant	76966	81389	88923	120442	99922	117636	108322	109318	79000	76653	82859	87693
Corrected: SNV:-1C,1C	0	14	623	0	19	423	1	10	246	2	6	204
SNV:5A	24	31	28	39	38	46	32	47	29	30	23	31
SNV:-10A	11	42	30	27	61	42	24	29	17	46	23	33
SNV:-2G	17	39	10	25	39	35	17	16	13	44	17	18
SNV:-11A	20	32	24	26	40	23	18	20	24	26	21	14
SNV:-14T	14	23	20	18	35	29	13	28	24	39	14	18
SNV:-11T	18	32	16	21	49	23	14	16	26	23	11	19
SNV:-15C	18	19	25	27	24	28	17	22	20	16	16	21
SNV:4T	14	24	21	21	20	19	26	25	15	20	15	24
SNV:-9G	7	20	14	25	18	16	24	32	14	22	17	15
SNV:6T	9	44	11	4	45	8	9	13	9	40	8	21
SNV:-6T	12	15	9	16	29	17	25	21	17	19	16	20
SNV:6C	4	38	4	1	47	4	5	5	10	60	8	12
SNV:-10T	11	26	10	12	24	11	19	11	13	24	10	13
SNV:5T	6	16	13	20	23	13	15	15	13	23	9	11
SNV:1C	10	8	15	16	17	23	9	21	13	9	12	16
SNV:-7G	14	20	11	15	21	14	12	9	11	16	15	9
SNV:-9T	4	24	7	9	31	11	10	11	9	29	5	10
SNV:-8T	14	11	18	12	16	12	13	12	8	13	10	8
SNV:-13T	9	12	10	18	17	16	12	7	10	12	10	13
SNV:-16C	12	11	5	20	13	15	15	13	16	10	6	10
SNV:-3T	9	10	18	10	14	13	8	18	6	16	11	9
SNV:-14A	12	13	10	10	12	20	12	16	7	12	9	9
SNV:-17A	7	14	13	13	23	12	10	11	9	7	7	11
SNV:6A	11	13	9	11	15	7	14	13	8	10	11	10
SNV:2G	10	7	13	11	15	8	6	15	12	12	7	8
SNV:-3A	6	8	15	13	14	11	6	13	15	6	5	11
SNV:-13A	6	11	12	11	16	11	5	10	11	15	2	12
SNV:-12T	7	9	10	17	7	10	11	10	9	10	8	14
SNV:-5A	5	7	10	15	18	6	14	6	7	8	11	5
SNV:-5T	7	10	11	13	12	10	9	8	8	12	6	5
SNV:-12A	9	10	10	7	10	8	10	9	6	6	12	11
SNV:-6A	7	8	11	8	17	10	10	9	5	8	9	4
SNV:3G	5	7	8	7	11	10	12	9	8	9	6	10
SNV:-2T	7	13	4	8	21	7	4	4	4	16	2	5
SNV:-1A	5	8	13	8	5	8	4	11	5	11	6	3
SNV:-17T	1	5	12	6	11	7	5	14	5	4	7	7
SNV:-1T,2G,5A	0	3	31	0	5	27	0	0	6	0	6	6
SNV:-4T	4	5	11	6	13	11	6	4	7	7	5	4
SNV:1A	5	4	6	13	5	7	6	6	9	8	8	4
SNV:-4A	3	5	5	8	6	6	12	4	7	10	4	4
SNV:-1T	1	5	6	6	7	8	5	9	5	4	5	5
SNV:3T	5	8	2	2	5	11	5	6	1	1	7	7
SNV:-16A	4	3	1	12	6	7	4	7	6	1	7	1
SNV:-1C	1	2	15	1	3	9	5	3	7	5	1	6
SNV:-9C	2	6	2	4	12	4	4	4	1	9	5	5
SNV:-5C	3	10	1	1	12	3	1	4	3	13	1	4
SNV:-15G	6	8	3	3	6	5	4	1	0	11	2	7
SNV:-8A	0	3	1	5	7	4	3	5	2	11	4	3
SNV:5C	1	7	4	3	5	2	5	0	1	3	4	3
SNV:-7T	4	1	2	4	4	3	5	1	1	2	4	4
SNV:-2C	3	3	2	4	6	1	0	3	4	3	1	1
SNV:2T	2	0	5	0	5	5	4	1	1	4	2	2
SNV:-14C	1	0	3	0	6	3	1	3	2	3	2	6
SNV:4A	3	3	1	3	3	6	0	1	2	0	6	1
SNV:-3G	2	3	1	4	1	4	0	1	1	5	1	4
SNV:-13G	4	0	2	4	3	2	2	4	1	2	1	0
SNV:2C	0	1	4	2	1	1	2	3	3	5	1	2
SNV:3C	0	3	3	2	2	2	4	1	0	4	1	3
SNV:-10G	1	1	4	2	2	3	4	2	3	1	0	0
SNV:4G	0	2	1	4	2	2	3	0	1	4	2	2
SNV:-7C	1	2	1	0	3	0	2	3	3	3	1	3
SNV:-6C	1	4	0	2	5	1	2	3	2	1	1	0
SNV:-15A	3	2	1	2	3	3	3	0	3	1	0	1
SNV:1G	3	1	0	3	2	2	3	3	1	2	0	0
SNV:-12G	1	2	0	4	3	4	0	2	0	0	0	1
SNV:-17G	1	1	2	0	4	4	3	0	0	0	1	0
SNV:-4C	1	1	0	1	2	3	0	1	2	3	0	1
SNV:-8G	1	0	0	1	3	3	0	3	1	0	1	1
SNV:-16G	1	2	0	3	1	1	1	0	3	1	0	1
SNV:-11G	0	2	0	3	0	0	3	0	1	2	1	1
SNV:-1A,1C	0	0	7	0	0	2	0	0	2	0	0	0
SNV:-11T,6T	1	2	0	0	2	0	0	1	1	2	0	0
SNV:-10A,-9T	0	2	0	0	4	0	0	0	1	2	0	0
SNV:-1T,2G	0	0	7	0	0	0	0	0	0	0	0	0
SNV:-7G,6C	0	0	0	1	2	0	0	0	0	3	0	1
SNV:-14T,5T	1	1	0	0	0	0	0	0	1	3	0	0
SNV:-2G,6T	0	2	0	0	4	0	0	0	0	0	0	0
SNV:-13A,6C	0	1	0	1	0	0	0	0	0	3	0	1
SNV:-17A,-11A	1	1	0	0	2	0	0	0	1	0	0	0
SNV:-2G,2G	0	4	0	0	0	0	0	0	0	0	0	1
SNV:-9G,-7G	0	2	1	0	1	0	0	0	1	0	0	0
SNV:-13A,-2T	0	0	0	0	2	0	0	0	0	3	0	0
SNV:-11T,-8A	0	1	0	0	2	0	0	0	1	0	0	0
SNV:-13A,-10A	0	0	1	0	1	0	0	0	0	1	1	0
SNV:-17T,-1T,2G,5A	0	0	2	0	0	0	0	0	0	0	0	2
SNV:-17A,-4T	0	0	1	0	1	0	0	1	0	0	0	1
SNV:-3T,6C	0	0	0	0	1	0	0	1	0	2	0	0
SNV:-4A,-1C,1C	0	0	0	0	0	3	0	0	1	0	0	0
SNV:-15G,-9G	0	0	0	0	0	1	1	0	1	0	0	1
SNV:-7G,-2T	1	0	0	0	0	0	0	0	0	2	0	0
SNV:-14C,-9C	1	0	0	0	0	0	0	0	0	0	0	2
SNV:-10T,-5C	0	1	0	0	0	0	0	0	0	2	0	0
SNV:-9T,-7G	0	1	0	0	0	0	0	1	0	1	0	0
SNV:2G,5A	0	1	0	0	0	1	0	0	1	0	0	0
SNV:-15G,-10A	0	0	1	0	1	0	0	0	0	1	0	0
SNV:-2T,-1C,1C	0	0	1	0	0	0	0	0	0	0	0	2
SNV:-10T,-9G	0	0	0	0	1	0	1	0	0	1	0	0
SNV:-2C,6C	0	0	0	0	2	0	0	0	0	1	0	0
SNV:-2T,6C	0	0	0	0	1	0	0	0	0	2	0	0
SNV:-14T,-8A	0	0	0	0	0	1	0	0	0	1	0	1
SNV:-14T,-11T	0	0	0	0	0	0	1	0	0	2	0	0
SNV:-15G,-13A	0	0	0	0	0	0	0	0	1	2	0	0
SNV:-13T,-10A	1	1	0	0	0	0	0	0	0	0	0	0
SNV:1C,3C	1	0	1	0	0	0	0	0	0	0	0	0
SNV:-11T,-8A,-2G	0	1	0	0	1	0	0	0	0	0	0	0
SNV:-14T,-12G	0	1	0	0	0	0	0	0	1	0	0	0
SNV:-14T,6T	0	1	0	0	0	0	0	0	0	1	0	0
SNV:-8G,5T	0	1	0	0	0	0	0	0	0	0	1	0
SNV:-10A,-7G	0	1	0	0	1	0	0	0	0	0	0	0
SNV:-10A,6C	0	1	0	0	0	0	0	0	0	1	0	0
SNV:-11A,-10A	0	1	0	0	0	0	0	0	0	1	0	0
SNV:-5C,6C	0	1	0	0	0	0	0	0	0	1	0	0
SNV:-13A,-7G	0	1	0	0	0	0	0	0	0	1	0	0
SNV:-13A,-10T	0	1	0	0	0	0	0	0	0	1	0	0
SNV:-13A,-1A	0	1	0	0	0	0	0	0	0	1	0	0
SNV:-3T,-2G	0	1	0	0	0	1	0	0	0	0	0	0
SNV:-2G,-1C	0	0	1	0	0	0	0	1	0	0	0	0
SNV:-17A,-15G,-3A	0	0	1	0	1	0	0	0	0	0	0	0
SNV:-13T,-7G	0	0	1	0	0	0	0	1	0	0	0	0
SNV:-17T,-1C,1C	0	0	1	0	0	1	0	0	0	0	0	0
SNV:-9G,3G	0	0	1	0	0	0	0	0	0	1	0	0
SNV:-14T,1G	0	0	0	1	1	0	0	0	0	0	0	0
SNV:-15G,-11A	0	0	0	1	0	1	0	0	0	0	0	0
SNV:1C,6C	0	0	0	0	1	0	0	0	0	1	0	0
SNV:-6C,5T	0	0	0	0	1	0	0	0	0	1	0	0
SNV:-9T,6C	0	0	0	0	2	0	0	0	0	0	0	0
SNV:-2T,1C	0	0	0	0	2	0	0	0	0	0	0	0
SNV:-14T,-8A,6T	0	0	0	0	1	1	0	0	0	0	0	0
SNV:-9G,-2G	0	0	0	0	1	1	0	0	0	0	0	0
SNV:-10A,-1A	0	0	0	0	2	0	0	0	0	0	0	0
SNV:-2G,6C	0	0	0	0	2	0	0	0	0	0	0	0
SNV:-11T,-2G	0	0	0	0	1	0	0	0	1	0	0	0
SNV:-13T,5T	0	0	0	0	1	1	0	0	0	0	0	0
SNV:3G,5A	0	0	0	0	0	1	0	1	0	0	0	0
SNV:-10A,5T	0	0	0	0	0	1	0	0	0	0	0	1
SNV:-2C,2C	0	0	0	0	0	1	0	0	0	0	1	0
SNV:-15G,2C	0	0	0	0	0	0	1	0	0	1	0	0
SNV:-15G,-7G	0	0	0	0	0	0	2	0	0	0	0	0
SNV:2C,4G	0	0	0	0	0	0	1	1	0	0	0	0
SNV:-9C,-6T	0	0	0	0	0	0	0	1	0	1	0	0
SNV:-13T,-11A	0	0	0	0	0	0	0	0	1	0	0	1
SNV:-14T,-10A	0	0	0	0	0	0	0	0	2	0	0	0
SNV:-8A,6T	0	0	0	0	0	0	0	0	0	1	0	1
SNV:-7G,-3T	0	0	0	0	0	0	0	0	0	2	0	0
SNV:-17T,-13A,-10A,-9G,-1C,4T	1	0	0	0	0	0	0	0	0	0	0	0
SNV:-16C,-9C	1	0	0	0	0	0	0	0	0	0	0	0
SNV:3G,5T	1	0	0	0	0	0	0	0	0	0	0	0
SNV:-9C,-8A	1	0	0	0	0	0	0	0	0	0	0	0
SNV:-10T,-6C,-4T	1	0	0	0	0	0	0	0	0	0	0	0
SNV:-14T,-2G,6T	1	0	0	0	0	0	0	0	0	0	0	0
SNV:-15G,5T	1	0	0	0	0	0	0	0	0	0	0	0
SNV:-11T,1C	1	0	0	0	0	0	0	0	0	0	0	0
SNV:-17T,-16C,-11T,-10G	1	0	0	0	0	0	0	0	0	0	0	0
SNV:-16G,-12G,3G	1	0	0	0	0	0	0	0	0	0	0	0
SNV:-12T,5A	1	0	0	0	0	0	0	0	0	0	0	0
SNV:-16G,1A,2G	1	0	0	0	0	0	0	0	0	0	0	0
SNV:-16A,-9C,-1T	1	0	0	0	0	0	0	0	0	0	0	0
SNV:-16A,-7G,-2G	1	0	0	0	0	0	0	0	0	0	0	0
SNV:-15G,-10G,3G	1	0	0	0	0	0	0	0	0	0	0	0
SNV:-13A,-9T,5T	1	0	0	0	0	0	0	0	0	0	0	0
SNV:-11T,-5C	1	0	0	0	0	0	0	0	0	0	0	0
SNV:-13G,-9G	1	0	0	0	0	0	0	0	0	0	0	0
SNV:-13G,-12A,-9C,5A,6A	1	0	0	0	0	0	0	0	0	0	0	0
SNV:-13T,2C,6C	0	1	0	0	0	0	0	0	0	0	0	0
SNV:-10A,-6A	0	1	0	0	0	0	0	0	0	0	0	0
SNV:-9T,5T	0	1	0	0	0	0	0	0	0	0	0	0
SNV:-11A,-9T	0	1	0	0	0	0	0	0	0	0	0	0
SNV:-7C,-2G,6T	0	1	0	0	0	0	0	0	0	0	0	0
SNV:-16G,3G	0	1	0	0	0	0	0	0	0	0	0	0
SNV:-14C,-13T,-2T,6A	0	1	0	0	0	0	0	0	0	0	0	0
SNV:3C,6A	0	1	0	0	0	0	0	0	0	0	0	0
SNV:-4C,-2G,6T	0	1	0	0	0	0	0	0	0	0	0	0
SNV:4G,5T	0	1	0	0	0	0	0	0	0	0	0	0
SNV:-10A,-7G,6C	0	1	0	0	0	0	0	0	0	0	0	0
SNV:-7G,-6T	0	1	0	0	0	0	0	0	0	0	0	0
SNV:-13T,-9T,-8G,-6T,2C,5T,6C	0	1	0	0	0	0	0	0	0	0	0	0
SNV:-10T,-2T	0	1	0	0	0	0	0	0	0	0	0	0
SNV:-16G,-9C,3G	0	1	0	0	0	0	0	0	0	0	0	0
SNV:-16C,-13G	0	1	0	0	0	0	0	0	0	0	0	0
SNV:2C,4T	0	1	0	0	0	0	0	0	0	0	0	0
SNV:-10A,-5C,-1A	0	1	0	0	0	0	0	0	0	0	0	0
SNV:-15G,-7C	0	1	0	0	0	0	0	0	0	0	0	0
SNV:2G,6T	0	1	0	0	0	0	0	0	0	0	0	0
SNV:-13T,-6A,5T	0	1	0	0	0	0	0	0	0	0	0	0
SNV:-13A,-10A,6T	0	1	0	0	0	0	0	0	0	0	0	0
SNV:-6A,-1C	0	1	0	0	0	0	0	0	0	0	0	0
SNV:-16C,-2G,2G	0	1	0	0	0	0	0	0	0	0	0	0
SNV:-10A,-2T	0	1	0	0	0	0	0	0	0	0	0	0
SNV:-17A,-8A,3T,6A	0	1	0	0	0	0	0	0	0	0	0	0
SNV:-16G,1C	0	1	0	0	0	0	0	0	0	0	0	0
SNV:-11T,-8A,-6T	0	1	0	0	0	0	0	0	0	0	0	0
SNV:3C,6T	0	1	0	0	0	0	0	0	0	0	0	0
SNV:2T,5T	0	1	0	0	0	0	0	0	0	0	0	0
SNV:3C,5A	0	1	0	0	0	0	0	0	0	0	0	0
SNV:-13T,-9G,-6T	0	1	0	0	0	0	0	0	0	0	0	0
SNV:-1C,1C,2T	0	1	0	0	0	0	0	0	0	0	0	0
SNV:-5C,5C	0	1	0	0	0	0	0	0	0	0	0	0
SNV:-13A,-2G	0	1	0	0	0	0	0	0	0	0	0	0
SNV:-11A,5T,6A	0	1	0	0	0	0	0	0	0	0	0	0
SNV:-12T,-11A,5C	0	1	0	0	0	0	0	0	0	0	0	0
SNV:-5C,6A	0	1	0	0	0	0	0	0	0	0	0	0
SNV:-9C,-1C	0	1	0	0	0	0	0	0	0	0	0	0
SNV:-9G,-8G,-5T,-2G,2C,3C	0	1	0	0	0	0	0	0	0	0	0	0
SNV:-9T,-2T,5T	0	1	0	0	0	0	0	0	0	0	0	0
SNV:-17T,-5C,-3T,-1A	0	1	0	0	0	0	0	0	0	0	0	0
SNV:-9T,-5T,-2T,4T	0	1	0	0	0	0	0	0	0	0	0	0
SNV:-9C,-1A	0	1	0	0	0	0	0	0	0	0	0	0
SNV:-14T,-13A,4A	0	0	1	0	0	0	0	0	0	0	0	0
SNV:-11A,-2G	0	0	1	0	0	0	0	0	0	0	0	0
SNV:-1C,1A	0	0	1	0	0	0	0	0	0	0	0	0
SNV:-1C,3G	0	0	1	0	0	0	0	0	0	0	0	0
SNV:-9C,1C,4T,6C	0	0	1	0	0	0	0	0	0	0	0	0
SNV:-6T,-5T,-4T,-1C	0	0	1	0	0	0	0	0	0	0	0	0
SNV:-17A,-15G	0	0	1	0	0	0	0	0	0	0	0	0
SNV:-3T,-1C,1C	0	0	1	0	0	0	0	0	0	0	0	0
SNV:-17G,-14T,3C	0	0	1	0	0	0	0	0	0	0	0	0
SNV:-15G,-9G,4G	0	0	1	0	0	0	0	0	0	0	0	0
SNV:-8A,-3A,-1C,1C	0	0	1	0	0	0	0	0	0	0	0	0
SNV:-17T,-5T,6C	0	0	1	0	0	0	0	0	0	0	0	0
SNV:-15G,-9T,-6A,-1C	0	0	1	0	0	0	0	0	0	0	0	0
SNV:-1C,1C,3C	0	0	1	0	0	0	0	0	0	0	0	0
SNV:-13G,3G	0	0	1	0	0	0	0	0	0	0	0	0
SNV:-1A,3G	0	0	1	0	0	0	0	0	0	0	0	0
SNV:-13T,-12G,-10A,-7G,-5C	0	0	1	0	0	0	0	0	0	0	0	0
SNV:-15G,-1C,1C	0	0	1	0	0	0	0	0	0	0	0	0
SNV:-3G,-1C,1C	0	0	1	0	0	0	0	0	0	0	0	0
SNV:-2C,-1C,1C	0	0	1	0	0	0	0	0	0	0	0	0
SNV:-14C,-6A	0	0	1	0	0	0	0	0	0	0	0	0
SNV:-15G,-10T,-5C	0	0	1	0	0	0	0	0	0	0	0	0
SNV:-17A,-13A	0	0	1	0	0	0	0	0	0	0	0	0
SNV:-1T,1C	0	0	1	0	0	0	0	0	0	0	0	0
SNV:1C,3G	0	0	1	0	0	0	0	0	0	0	0	0
SNV:-16G,-2G	0	0	1	0	0	0	0	0	0	0	0	0
SNV:-8T,-1C,1C	0	0	1	0	0	0	0	0	0	0	0	0
SNV:-5T,-4T,-1C,2T	0	0	1	0	0	0	0	0	0	0	0	0
SNV:-17A,-6A,-4C,-1A,5C	0	0	0	1	0	0	0	0	0	0	0	0
SNV:-13T,5A	0	0	0	1	0	0	0	0	0	0	0	0
SNV:-15G,-14T	0	0	0	1	0	0	0	0	0	0	0	0
SNV:-17A,-15G,-13A,-3A	0	0	0	1	0	0	0	0	0	0	0	0
SNV:-3G,-2C	0	0	0	1	0	0	0	0	0	0	0	0
SNV:-13A,5T	0	0	0	1	0	0	0	0	0	0	0	0
SNV:-10A,-9T,-6T,-5T	0	0	0	1	0	0	0	0	0	0	0	0
SNV:3G,5C	0	0	0	1	0	0	0	0	0	0	0	0
SNV:-15C,3C,6A	0	0	0	1	0	0	0	0	0	0	0	0
SNV:-16G,-11G	0	0	0	1	0	0	0	0	0	0	0	0
SNV:-17A,-13A,-10T,-9C,-6T	0	0	0	1	0	0	0	0	0	0	0	0
SNV:-17A,-12A,-11A,-9C,-8A,-6T	0	0	0	1	0	0	0	0	0	0	0	0
SNV:-14A,-5T,-4T,-1C	0	0	0	1	0	0	0	0	0	0	0	0
SNV:-2T,5A	0	0	0	0	1	0	0	0	0	0	0	0
SNV:-14T,-11A,-2G,5T	0	0	0	0	1	0	0	0	0	0	0	0
SNV:-7C,2G	0	0	0	0	1	0	0	0	0	0	0	0
SNV:-14T,-11A	0	0	0	0	1	0	0	0	0	0	0	0
SNV:-15G,-1A	0	0	0	0	1	0	0	0	0	0	0	0
SNV:-8A,-3G	0	0	0	0	1	0	0	0	0	0	0	0
SNV:-13A,-6C,-2T	0	0	0	0	1	0	0	0	0	0	0	0
SNV:-8A,-2G	0	0	0	0	1	0	0	0	0	0	0	0
SNV:-13G,-7C	0	0	0	0	1	0	0	0	0	0	0	0
SNV:-1A,4T,6C	0	0	0	0	1	0	0	0	0	0	0	0
SNV:-11T,-6A	0	0	0	0	1	0	0	0	0	0	0	0
SNV:-3T,6T	0	0	0	0	1	0	0	0	0	0	0	0
SNV:-10A,-8G,-6T	0	0	0	0	1	0	0	0	0	0	0	0
SNV:-17T,-16C,-14T,-11T,6T	0	0	0	0	1	0	0	0	0	0	0	0
SNV:-12T,-10A	0	0	0	0	1	0	0	0	0	0	0	0
SNV:-11T,-5T	0	0	0	0	1	0	0	0	0	0	0	0
SNV:-14T,3C,6T	0	0	0	0	1	0	0	0	0	0	0	0
SNV:-11T,-9T,-4A	0	0	0	0	1	0	0	0	0	0	0	0
SNV:-16C,-11A	0	0	0	0	1	0	0	0	0	0	0	0
SNV:-11A,-3A	0	0	0	0	1	0	0	0	0	0	0	0
SNV:-1C,6C	0	0	0	0	1	0	0	0	0	0	0	0
SNV:-14C,-9C,-1T	0	0	0	0	1	0	0	0	0	0	0	0
SNV:-13G,-7G	0	0	0	0	1	0	0	0	0	0	0	0
SNV:-6A,6T	0	0	0	0	1	0	0	0	0	0	0	0
SNV:-1A,1G,6C	0	0	0	0	1	0	0	0	0	0	0	0
SNV:-10T,4T	0	0	0	0	1	0	0	0	0	0	0	0
SNV:-13A,-2C	0	0	0	0	1	0	0	0	0	0	0	0
SNV:-14T,-9T	0	0	0	0	1	0	0	0	0	0	0	0
SNV:-17G,-10A	0	0	0	0	1	0	0	0	0	0	0	0
SNV:-2C,-1C,5T	0	0	0	0	1	0	0	0	0	0	0	0
SNV:-11A,-1C,1C	0	0	0	0	1	0	0	0	0	0	0	0
SNV:-16C,-2T	0	0	0	0	1	0	0	0	0	0	0	0
SNV:-16C,-14T	0	0	0	0	1	0	0	0	0	0	0	0
SNV:-16C,-2G	0	0	0	0	1	0	0	0	0	0	0	0
SNV:-10A,-7G,-3T	0	0	0	0	1	0	0	0	0	0	0	0
SNV:-17T,-8A	0	0	0	0	1	0	0	0	0	0	0	0
SNV:-7G,2C	0	0	0	0	1	0	0	0	0	0	0	0
SNV:-17A,-12A,-8A	0	0	0	0	1	0	0	0	0	0	0	0
SNV:-12A,-11G,-4A	0	0	0	0	1	0	0	0	0	0	0	0
SNV:-16C,-2G,3T,6C	0	0	0	0	1	0	0	0	0	0	0	0
SNV:-7G,-5C,2C	0	0	0	0	1	0	0	0	0	0	0	0
SNV:-17G,-1C,6C	0	0	0	0	1	0	0	0	0	0	0	0
SNV:-14T,-10A,5T	0	0	0	0	1	0	0	0	0	0	0	0
SNV:1G,4T	0	0	0	0	1	0	0	0	0	0	0	0
SNV:-1C,5C	0	0	0	0	1	0	0	0	0	0	0	0
SNV:-14C,-2T,2T,6A	0	0	0	0	1	0	0	0	0	0	0	0
SNV:-14T,-11T,-8A	0	0	0	0	1	0	0	0	0	0	0	0
SNV:-9C,-5T,1C	0	0	0	0	1	0	0	0	0	0	0	0
SNV:-10A,-9T,5T	0	0	0	0	1	0	0	0	0	0	0	0
SNV:-7G,-5C,6C	0	0	0	0	1	0	0	0	0	0	0	0
SNV:-11A,-7G	0	0	0	0	1	0	0	0	0	0	0	0
SNV:-5T,3C	0	0	0	0	1	0	0	0	0	0	0	0
SNV:-7G,-3T,6C	0	0	0	0	1	0	0	0	0	0	0	0
SNV:-10A,-3T	0	0	0	0	1	0	0	0	0	0	0	0
SNV:-13A,-9T,-6C	0	0	0	0	1	0	0	0	0	0	0	0
SNV:-17T,-12A	0	0	0	0	1	0	0	0	0	0	0	0
SNV:-2C,-1C	0	0	0	0	0	1	0	0	0	0	0	0
SNV:-16G,-9G	0	0	0	0	0	1	0	0	0	0	0	0
SNV:1A,6A	0	0	0	0	0	1	0	0	0	0	0	0
SNV:-13T,-10T	0	0	0	0	0	1	0	0	0	0	0	0
SNV:-16C,2G	0	0	0	0	0	1	0	0	0	0	0	0
SNV:-9G,-1T,2C,5C	0	0	0	0	0	1	0	0	0	0	0	0
SNV:-17A,-10A,-9C,-8T,-5T	0	0	0	0	0	1	0	0	0	0	0	0
SNV:-15G,-11A,-3A	0	0	0	0	0	1	0	0	0	0	0	0
SNV:-15G,-13A,-12G	0	0	0	0	0	1	0	0	0	0	0	0
SNV:-4C,1C,3G,6C	0	0	0	0	0	1	0	0	0	0	0	0
SNV:-14T,2T	0	0	0	0	0	1	0	0	0	0	0	0
SNV:-6A,-1C,1C	0	0	0	0	0	1	0	0	0	0	0	0
SNV:-6T,-5T	0	0	0	0	0	1	0	0	0	0	0	0
SNV:-15C,1G	0	0	0	0	0	1	0	0	0	0	0	0
SNV:4G,6C	0	0	0	0	0	1	0	0	0	0	0	0
SNV:-9G,-8G,-2G,1C,3C	0	0	0	0	0	1	0	0	0	0	0	0
SNV:-17A,5C	0	0	0	0	0	1	0	0	0	0	0	0
SNV:-10A,-6T,-5T	0	0	0	0	0	1	0	0	0	0	0	0
SNV:-5T,-2C	0	0	0	0	0	1	0	0	0	0	0	0
SNV:-13T,-1C,1C	0	0	0	0	0	1	0	0	0	0	0	0
SNV:-7G,-3A	0	0	0	0	0	1	0	0	0	0	0	0
SNV:-3A,5T	0	0	0	0	0	1	0	0	0	0	0	0
SNV:-17A,-16G,-13A,-12A,-4T,4A	0	0	0	0	0	1	0	0	0	0	0	0
SNV:-16C,-4T	0	0	0	0	0	1	0	0	0	0	0	0
SNV:-14A,-11A	0	0	0	0	0	1	0	0	0	0	0	0
SNV:-10G,-6C	0	0	0	0	0	1	0	0	0	0	0	0
SNV:-16G,5T	0	0	0	0	0	1	0	0	0	0	0	0
SNV:-17T,-9C,-6A	0	0	0	0	0	1	0	0	0	0	0	0
SNV:-17A,-14T,-6T	0	0	0	0	0	0	1	0	0	0	0	0
SNV:-15C,-9C,1C	0	0	0	0	0	0	1	0	0	0	0	0
SNV:-13G,-11T	0	0	0	0	0	0	1	0	0	0	0	0
SNV:-13T,-11A,-10T	0	0	0	0	0	0	1	0	0	0	0	0
SNV:-15C,-14C,-9C,-2C	0	0	0	0	0	0	1	0	0	0	0	0
SNV:2C,3T	0	0	0	0	0	0	1	0	0	0	0	0
SNV:-14T,-9C	0	0	0	0	0	0	1	0	0	0	0	0
SNV:-2G,6A	0	0	0	0	0	0	1	0	0	0	0	0
SNV:-14T,-9C,5T	0	0	0	0	0	0	1	0	0	0	0	0
SNV:-10G,-9C	0	0	0	0	0	0	1	0	0	0	0	0
SNV:-13A,2T,3G	0	0	0	0	0	0	1	0	0	0	0	0
SNV:-8A,-2G,3T	0	0	0	0	0	0	1	0	0	0	0	0
SNV:-7C,-2G	0	0	0	0	0	0	1	0	0	0	0	0
SNV:-15G,-3T	0	0	0	0	0	0	1	0	0	0	0	0
SNV:-15G,-12G,-9C,-2C	0	0	0	0	0	0	0	1	0	0	0	0
SNV:-6T,6T	0	0	0	0	0	0	0	1	0	0	0	0
SNV:-11A,-7C	0	0	0	0	0	0	0	1	0	0	0	0
SNV:-14T,4T	0	0	0	0	0	0	0	1	0	0	0	0
SNV:-12G,-10A	0	0	0	0	0	0	0	1	0	0	0	0
SNV:-2G,2C	0	0	0	0	0	0	0	1	0	0	0	0
SNV:-15G,-12T,-10T,-7G	0	0	0	0	0	0	0	1	0	0	0	0
SNV:-11A,-9G	0	0	0	0	0	0	0	1	0	0	0	0
SNV:-15G,-11G,-9G	0	0	0	0	0	0	0	1	0	0	0	0
SNV:-8A,-2G,6T	0	0	0	0	0	0	0	1	0	0	0	0
SNV:-12A,4A	0	0	0	0	0	0	0	1	0	0	0	0
SNV:-8A,-4T	0	0	0	0	0	0	0	1	0	0	0	0
SNV:-2G,1A	0	0	0	0	0	0	0	1	0	0	0	0
SNV:-14C,-9C,1C,2C	0	0	0	0	0	0	0	1	0	0	0	0
SNV:-10T,-9C,-8A,6T	0	0	0	0	0	0	0	1	0	0	0	0
SNV:-8A,-4C	0	0	0	0	0	0	0	1	0	0	0	0
SNV:-4T,1C,2C	0	0	0	0	0	0	0	1	0	0	0	0
SNV:-12A,-8A,-4T	0	0	0	0	0	0	0	0	1	0	0	0
SNV:-9C,-4C,-2G	0	0	0	0	0	0	0	0	1	0	0	0
SNV:-12T,-6A	0	0	0	0	0	0	0	0	1	0	0	0
SNV:-17A,-6T	0	0	0	0	0	0	0	0	1	0	0	0
SNV:-15C,6T	0	0	0	0	0	0	0	0	1	0	0	0
SNV:-3T,3C	0	0	0	0	0	0	0	0	1	0	0	0
SNV:-6C,2T,3C	0	0	0	0	0	0	0	0	1	0	0	0
SNV:-11T,-8A,3C	0	0	0	0	0	0	0	0	1	0	0	0
SNV:1C,3C,5A	0	0	0	0	0	0	0	0	1	0	0	0
SNV:-14T,-12T	0	0	0	0	0	0	0	0	1	0	0	0
SNV:-9G,-1C,1C	0	0	0	0	0	0	0	0	1	0	0	0
SNV:-17T,-10A	0	0	0	0	0	0	0	0	1	0	0	0
SNV:-12A,-4T	0	0	0	0	0	0	0	0	1	0	0	0
SNV:-15A,-13A,-6A	0	0	0	0	0	0	0	0	1	0	0	0
SNV:-14T,6C	0	0	0	0	0	0	0	0	1	0	0	0
SNV:-14A,-12G,3G	0	0	0	0	0	0	0	0	1	0	0	0
SNV:-9C,-8T	0	0	0	0	0	0	0	0	1	0	0	0
SNV:-17A,-13G,-12A,-8A,-7C,-6T	0	0	0	0	0	0	0	0	1	0	0	0
SNV:-10G,3G	0	0	0	0	0	0	0	0	0	1	0	0
SNV:-8G,-2T	0	0	0	0	0	0	0	0	0	1	0	0
SNV:-5A,5C	0	0	0	0	0	0	0	0	0	1	0	0
SNV:-13T,-12A,-4T,3G,6T	0	0	0	0	0	0	0	0	0	1	0	0
SNV:-14T,-6C	0	0	0	0	0	0	0	0	0	1	0	0
SNV:-9C,-1T	0	0	0	0	0	0	0	0	0	1	0	0
SNV:-9T,-6T	0	0	0	0	0	0	0	0	0	1	0	0
SNV:-10A,-9T,-7G,6C	0	0	0	0	0	0	0	0	0	1	0	0
SNV:-17T,-8A,-6T,-2G	0	0	0	0	0	0	0	0	0	1	0	0
SNV:-13T,-7G,-2T	0	0	0	0	0	0	0	0	0	1	0	0
SNV:-17T,-14T,-8A,6T	0	0	0	0	0	0	0	0	0	1	0	0
SNV:-13T,-1T	0	0	0	0	0	0	0	0	0	1	0	0
SNV:-10A,-9T,-6A	0	0	0	0	0	0	0	0	0	1	0	0
SNV:-11A,-10T,-2T	0	0	0	0	0	0	0	0	0	1	0	0
SNV:-13A,-10A,-2T,6C	0	0	0	0	0	0	0	0	0	1	0	0
SNV:-14T,6A	0	0	0	0	0	0	0	0	0	1	0	0
SNV:-9G,-5C	0	0	0	0	0	0	0	0	0	1	0	0
SNV:-10T,-1T	0	0	0	0	0	0	0	0	0	1	0	0
SNV:-13G,-9C,-1A	0	0	0	0	0	0	0	0	0	1	0	0
SNV:-13A,-7G,-6T,5A	0	0	0	0	0	0	0	0	0	1	0	0
SNV:-2T,1C,6C	0	0	0	0	0	0	0	0	0	1	0	0
SNV:-6C,-2T	0	0	0	0	0	0	0	0	0	1	0	0
SNV:-9G,-7G,-2T	0	0	0	0	0	0	0	0	0	1	0	0
SNV:-2T,2C	0	0	0	0	0	0	0	0	0	1	0	0
SNV:-11A,-6T	0	0	0	0	0	0	0	0	0	1	0	0
SNV:-4T,-3G	0	0	0	0	0	0	0	0	0	1	0	0
SNV:-11A,6C	0	0	0	0	0	0	0	0	0	1	0	0
SNV:-11T,-2G,6T	0	0	0	0	0	0	0	0	0	1	0	0
SNV:-10T,6C	0	0	0	0	0	0	0	0	0	1	0	0
SNV:-14T,-12A	0	0	0	0	0	0	0	0	0	1	0	0
SNV:-16C,6T	0	0	0	0	0	0	0	0	0	1	0	0
SNV:-2C,5C	0	0	0	0	0	0	0	0	0	1	0	0
SNV:-14A,-9C,-6C	0	0	0	0	0	0	0	0	0	1	0	0
SNV:-5T,-1T	0	0	0	0	0	0	0	0	0	1	0	0
SNV:-17A,5A	0	0	0	0	0	0	0	0	0	1	0	0
SNV:-15A,-1C,1C	0	0	0	0	0	0	0	0	0	1	0	0
SNV:-11G,4G	0	0	0	0	0	0	0	0	0	1	0	0
SNV:-4C,6T	0	0	0	0	0	0	0	0	0	1	0	0
SNV:-7C,6C	0	0	0	0	0	0	0	0	0	1	0	0
SNV:-8T,1A	0	0	0	0	0	0	0	0	0	1	0	0
SNV:-13G,-9C	0	0	0	0	0	0	0	0	0	1	0	0
SNV:-9G,2C	0	0	0	0	0	0	0	0	0	1	0	0
SNV:-9C,-6A,1A	0	0	0	0	0	0	0	0	0	1	0	0
SNV:-13A,-6A	0	0	0	0	0	0	0	0	0	1	0	0
SNV:-3T,-2G,3C	0	0	0	0	0	0	0	0	0	1	0	0
SNV:-9G,-7G,-2C	0	0	0	0	0	0	0	0	0	1	0	0
SNV:-11T,1G	0	0	0	0	0	0	0	0	0	1	0	0
SNV:5T,6C	0	0	0	0	0	0	0	0	0	1	0	0
SNV:-14T,-2T,6T	0	0	0	0	0	0	0	0	0	1	0	0
SNV:-4C,-2G	0	0	0	0	0	0	0	0	0	1	0	0
SNV:-4C,3T	0	0	0	0	0	0	0	0	0	1	0	0
SNV:-16C,-12A,6T	0	0	0	0	0	0	0	0	0	1	0	0
SNV:-17T,-16C,-11T	0	0	0	0	0	0	0	0	0	1	0	0
SNV:-15G,-9G,2C	0	0	0	0	0	0	0	0	0	1	0	0
SNV:-3T,-2T,3G	0	0	0	0	0	0	0	0	0	1	0	0
SNV:-8T,6C	0	0	0	0	0	0	0	0	0	1	0	0
SNV:-14C,-9C,-5A,-1C,1A,6A	0	0	0	0	0	0	0	0	0	1	0	0
SNV:-9G,1G	0	0	0	0	0	0	0	0	0	1	0	0
SNV:-9C,-8A,-1T	0	0	0	0	0	0	0	0	0	1	0	0
SNV:-4A,6C	0	0	0	0	0	0	0	0	0	1	0	0
SNV:-10A,2G	0	0	0	0	0	0	0	0	0	1	0	0
SNV:2T,6C	0	0	0	0	0	0	0	0	0	1	0	0
SNV:2C,6C	0	0	0	0	0	0	0	0	0	1	0	0
SNV:-13A,-9G,-6A	0	0	0	0	0	0	0	0	0	0	1	0
SNV:-11A,-5C	0	0	0	0	0	0	0	0	0	0	1	0
SNV:-14T,-1C	0	0	0	0	0	0	0	0	0	0	1	0
SNV:-11A,-6C	0	0	0	0	0	0	0	0	0	0	1	0
SNV:-12A,-4A	0	0	0	0	0	0	0	0	0	0	1	0
SNV:-13A,-9G,-1A	0	0	0	0	0	0	0	0	0	0	1	0
SNV:-1T,3C	0	0	0	0	0	0	0	0	0	0	1	0
SNV:-14T,-1T,2G,5A	0	0	0	0	0	0	0	0	0	0	1	0
SNV:-2G,3G	0	0	0	0	0	0	0	0	0	0	1	0
SNV:-17A,-14T	0	0	0	0	0	0	0	0	0	0	0	1
SNV:-9G,1C	0	0	0	0	0	0	0	0	0	0	0	1
SNV:-13T,-11A,-10T,-6C	0	0	0	0	0	0	0	0	0	0	0	1
SNV:-14A,4T	0	0	0	0	0	0	0	0	0	0	0	1
SNV:-15G,-5C,-1A	0	0	0	0	0	0	0	0	0	0	0	1
SNV:-14A,-13A	0	0	0	0	0	0	0	0	0	0	0	1
SNV:-10G,1G	0	0	0	0	0	0	0	0	0	0	0	1
SNV:-16A,-15A	0	0	0	0	0	0	0	0	0	0	0	1
SNV:-15G,-7G,2C	0	0	0	0	0	0	0	0	0	0	0	1
SNV:-14C,-9C,-5T	0	0	0	0	0	0	0	0	0	0	0	1
SNV:-17G,-11T,-9C,-8T,-7T,-4A	0	0	0	0	0	0	0	0	0	0	0	1
SNV:-3T,-2T	0	0	0	0	0	0	0	0	0	0	0	1
SNV:-1C,1C,3G	0	0	0	0	0	0	0	0	0	0	0	1
SNV:-16G,-9C	0	0	0	0	0	0	0	0	0	0	0	1
SNV:-10A,-1C,1C	0	0	0	0	0	0	0	0	0	0	0	1
SNV:-15G,-13G,-10A,-7T,-6T	0	0	0	0	0	0	0	0	0	0	0	1
SNV:-10A,-6T	0	0	0	0	0	0	0	0	0	0	0	1
SNV:1G,3G	0	0	0	0	0	0	0	0	0	0	0	1
SNV:-12T,-6C,-5T,-4A,-2G,-1A,4A	0	0	0	0	0	0	0	0	0	0	0	1
SNV:-16G,1G	0	0	0	0	0	0	0	0	0	0	0	1
SNV:-3G,4A	0	0	0	0	0	0	0	0	0	0	0	1
SNV:-1C,1C,2G	0	0	0	0	0	0	0	0	0	0	0	1
SNV:-9G,4A	0	0	0	0	0	0	0	0	0	0	0	1
SNV:-7G,-1C,1C	0	0	0	0	0	0	0	0	0	0	0	1
SNV:-15G,-4T	0	0	0	0	0	0	0	0	0	0	0	1
SNV:-9G,-2G,3G	0	0	0	0	0	0	0	0	0	0	0	1
SNV:-17G,-9G,-6A	0	0	0	0	0	0	0	0	0	0	0	1
-5:9D	3	65	361	2	119	339	1	52	84	4	31	59
-1:1D	0	25	60	1	19	60	0	21	23	0	2	25
-1:8D	0	20	64	0	21	49	0	8	22	1	4	15
-13:1D	14	15	13	20	18	23	21	23	18	7	15	12
-1:1I	0	12	47	0	15	62	0	2	27	0	6	16
1:1D	2	9	43	0	11	39	2	3	26	0	13	20
1:1I	0	7	59	0	14	34	0	2	31	0	0	13
-2:2D	0	11	67	0	10	32	1	0	5	0	15	11
-2:2I	0	2	33	0	6	19	0	0	14	0	3	8
2:1D	3	8	7	6	9	6	9	8	9	7	4	6
-9:18D	0	0	22	0	8	18	0	0	4	1	1	8
-6:10D	0	3	29	0	7	8	0	0	9	0	1	4
-8:5D	0	0	9	0	2	13	0	3	13	0	8	10
-4:8D	0	2	19	0	9	15	0	1	1	0	4	3
-7:7D	0	5	24	0	2	10	0	2	4	0	0	4
-14:13D	0	2	26	0	1	14	0	0	0	0	1	0
-8:14D	0	1	4	0	7	13	0	0	5	0	4	4
-6:1D	1	3	1	3	3	4	6	3	6	2	2	2
-16:1D	0	4	1	4	2	3	4	2	4	3	1	6
-17:27D	0	3	17	0	0	3	0	0	0	0	1	8
-6:6D	0	0	15	0	2	5	0	0	6	0	0	4
-9:11D	0	8	11	0	0	3	0	0	6	0	0	3
-8:26D	0	0	8	0	0	4	0	7	4	0	0	7
-9:9D	0	2	6	0	1	16	0	3	0	0	0	0
-16:16D	0	2	1	0	7	8	0	2	3	0	0	5
-14:19D	0	2	5	0	4	11	0	3	1	0	1	1
-7:9D	0	2	7	0	5	5	0	3	1	0	1	2
-6:1D,-1:8D	0	2	15	0	0	4	0	0	0	0	0	0
-14:22D	0	1	16	0	0	3	0	0	1	0	0	0
-1:10D	0	2	6	0	0	10	0	0	0	0	2	0
-15:15D	0	1	10	0	7	0	0	0	0	0	0	2
-7:8D	0	0	9	0	2	0	0	4	1	0	3	0
-11:11D	0	4	4	0	0	4	0	0	0	0	0	5
1:2D	0	4	2	0	3	2	0	0	3	0	0	3
-4:3D	0	0	7	0	0	5	1	0	2	0	0	2
-14:14D	0	0	0	0	5	7	0	2	0	0	0	3
-10:10D	0	3	7	0	0	0	0	0	0	0	1	5
1:2I	0	0	6	0	0	5	0	0	1	0	0	4
-22:33D	0	0	0	0	1	6	0	0	3	0	0	6
-5:4D	0	4	7	0	0	0	0	0	4	0	0	0
-2:3D	0	2	8	0	2	3	0	0	0	0	0	0
-12:12D	0	0	2	0	2	3	0	0	7	0	0	1
-1:6D	0	0	4	0	0	8	0	0	0	0	0	2
-14:23D	0	4	5	0	1	0	0	0	2	0	0	0
-13:23D	0	0	0	0	1	7	0	0	1	0	0	3
-12:22D	0	1	3	0	0	1	0	1	0	0	0	5
-18:33D	0	3	3	0	2	2	0	0	0	0	0	1
-8:8D	0	0	4	0	0	0	0	0	3	0	0	4
-13:12D	0	0	1	0	0	4	0	0	0	0	0	6
5:1D	1	0	2	2	0	1	0	0	2	0	1	1
-10:16D	0	1	4	0	1	4	0	0	0	0	0	0
-15:23D	0	0	3	0	0	3	0	0	0	0	0	4
-2:1I	0	0	5	0	1	1	0	0	0	0	0	3
-4:33D	0	0	4	0	0	2	0	0	0	0	4	0
1:8D	0	0	7	0	0	3	0	0	0	0	0	0
-34:43D	1	1	1	0	4	0	0	0	0	0	0	2
-7:16D	0	4	0	0	1	0	0	0	0	0	4	0
-10:28D	0	4	2	0	0	0	0	0	3	0	0	0
-20:20D	0	4	1	0	0	4	0	0	0	0	0	0
-23:22D	0	2	3	0	0	2	0	0	0	0	2	0
-13:16D	0	1	0	0	0	4	0	0	1	0	0	3
-2:4D	0	0	7	0	0	2	0	0	0	0	0	0
-10:2D	0	0	0	2	0	1	1	1	2	1	1	0
-2:1D	0	4	2	0	2	0	0	0	0	0	0	0
-11:26D	0	1	1	0	0	0	0	0	0	0	0	6
-14:35D	0	1	4	0	0	0	0	0	3	0	0	0
-3:28I	0	0	5	0	0	0	0	0	0	0	0	3
-58:59D	0	0	3	0	0	5	0	0	0	0	0	0
-9:10D	0	0	3	0	0	4	0	0	1	0	0	0
1:3I	0	0	1	0	0	7	0	0	0	0	0	0
-10:9D	0	0	0	0	5	2	0	0	0	0	0	1
-10:22D	0	0	0	0	0	8	0	0	0	0	0	0
-1:7D	0	0	0	0	0	7	0	0	1	0	0	0
-5:25D	0	0	0	0	0	0	0	8	0	0	0	0
-7:6D	0	0	0	0	0	0	0	0	0	0	4	4
-17:23D	0	2	0	0	0	0	0	0	1	0	0	4
-6:11D	0	0	5	0	1	0	0	0	1	0	0	0
-3:1D	0	0	4	0	0	3	0	0	0	0	0	0
-18:36D	0	0	6	0	0	1	0	0	0	0	0	0
-11:29D	0	0	7	0	0	0	0	0	0	0	0	0
-6:1I	0	0	4	0	0	0	0	0	3	0	0	0
-20:29D	0	0	7	0	0	0	0	0	0	0	0	0
4:10I	0	0	1	0	0	0	0	0	0	0	0	6
3:7I	0	0	0	0	0	5	0	0	2	0	0	0
-10:25D	0	0	0	0	0	5	0	0	0	0	0	2
-25:30D	0	0	0	0	0	7	0	0	0	0	0	0
-3:21D	0	0	0	0	0	2	0	3	2	0	0	0
-10:19D	0	0	0	0	0	0	0	0	7	0	0	0
1:3D	0	1	1	0	0	0	0	0	0	0	0	4
-11:17D	0	1	2	0	0	0	0	0	3	0	0	0
-3:6D	0	1	3	0	0	0	0	0	2	0	0	0
-1:20I	0	0	2	0	0	4	0	0	0	0	0	0
-19:21D	0	0	4	0	0	2	0	0	0	0	0	0
-4:11D	0	0	4	0	0	0	0	0	0	0	0	2
-16:40D	0	0	4	0	2	0	0	0	0	0	0	0
-21:38D	0	0	2	0	0	4	0	0	0	0	0	0
-14:34D	0	0	3	0	0	2	0	0	0	1	0	0
-1:2D	0	0	3	0	0	3	0	0	0	0	0	0
-1:20D	0	0	2	0	0	4	0	0	0	0	0	0
-8:23D	0	0	5	0	1	0	0	0	0	0	0	0
-10:20D	0	0	3	0	0	3	0	0	0	0	0	0
-9:1D	0	0	0	1	1	0	1	0	1	1	0	1
-3:28D	0	0	0	0	6	0	0	0	0	0	0	0
-1:52D	0	0	0	0	5	0	0	1	0	0	0	0
-1:2I	0	0	0	0	0	2	0	0	0	1	0	3
-31:45D	0	0	0	0	0	6	0	0	0	0	0	0
-19:19D	0	0	0	0	0	5	0	0	0	0	0	1
-42:52D	0	0	0	0	0	0	0	6	0	0	0	0
-2:88I	0	5	0	0	0	0	0	0	0	0	0	0
-13:2D	0	1	1	1	0	0	0	0	0	1	1	0
-15:44D	0	1	0	0	2	2	0	0	0	0	0	0
-23:31D	0	1	4	0	0	0	0	0	0	0	0	0
1:10D	0	0	3	0	0	2	0	0	0	0	0	0
-1:17I	0	0	3	0	0	2	0	0	0	0	0	0
-12:18D	0	0	4	0	0	0	0	0	1	0	0	0
-14:18D	0	0	2	0	0	0	0	0	1	0	2	0
-3:13I,1:8D	0	0	4	0	0	1	0	0	0	0	0	0
1:7D	0	0	2	0	0	0	0	0	0	0	0	3
-14:41D	0	0	4	0	0	0	0	0	0	0	1	0
-7:1D	0	0	1	0	0	0	0	2	0	1	0	1
-15:1I,-10:35D	0	0	5	0	0	0	0	0	0	0	0	0
-38:40D	0	0	1	0	0	4	0	0	0	0	0	0
-15:26D	0	0	1	0	0	1	0	0	3	0	0	0
-2:24I	0	0	1	0	0	4	0	0	0	0	0	0
-9:8D	0	0	0	0	0	2	0	0	0	0	3	0
-14:24D	0	0	0	0	0	1	0	0	0	0	0	4
-15:24D	0	0	0	0	0	0	0	0	2	0	0	3
-15:37D	0	0	0	0	0	0	0	0	5	0	0	0
-42:48D	0	0	0	0	0	0	0	0	5	0	0	0
3:9I	0	0	0	0	0	0	0	0	0	0	5	0
-12:56D	0	0	0	0	0	0	0	0	0	0	0	5
-13:1I	1	0	0	0	1	0	0	0	1	0	1	0
-8:13D	0	4	0	0	0	0	0	0	0	0	0	0
-17:30D	0	2	0	0	0	1	0	0	0	0	1	0
-35:36D	0	0	4	0	0	0	0	0	0	0	0	0
-3:21I	0	0	2	0	0	2	0	0	0	0	0	0
-1:26I	0	0	4	0	0	0	0	0	0	0	0	0
-17:35D	0	0	4	0	0	0	0	0	0	0	0	0
-21:35D	0	0	2	0	0	1	0	1	0	0	0	0
-26:32D	0	0	4	0	0	0	0	0	0	0	0	0
-19:41D	0	0	1	0	0	3	0	0	0	0	0	0
-25:27D	0	0	1	0	0	2	0	1	0	0	0	0
-28:42D	0	0	4	0	0	0	0	0	0	0	0	0
-14:1D	0	0	1	0	1	0	0	0	0	1	0	1
-11:14D	0	0	0	0	3	1	0	0	0	0	0	0
-8:9D	0	0	0	0	4	0	0	0	0	0	0	0
-12:27D	0	0	0	0	2	2	0	0	0	0	0	0
-11:8D	0	0	0	0	0	2	0	0	2	0	0	0
-4:50D	0	0	0	0	0	4	0	0	0	0	0	0
-3:7D	0	0	0	0	0	3	0	0	1	0	0	0
-21:27D	0	0	0	0	0	4	0	0	0	0	0	0
-17:18D	0	0	0	0	0	0	0	0	4	0	0	0
-9:31D	0	1	0	0	0	2	0	0	0	0	0	0
-13:28D	0	1	1	0	0	0	0	0	0	0	0	1
-4:34D	0	1	2	0	0	0	0	0	0	0	0	0
-16:37D	0	0	3	0	0	0	0	0	0	0	0	0
-11:10D	0	0	1	0	0	2	0	0	0	0	0	0
-27:23D,3:2D	0	0	3	0	0	0	0	0	0	0	0	0
-11:24D	0	0	3	0	0	0	0	0	0	0	0	0
-18:15D	0	0	3	0	0	0	0	0	0	0	0	0
-4:3D,4:1D	0	0	3	0	0	0	0	0	0	0	0	0
1:7I	0	0	3	0	0	0	0	0	0	0	0	0
-50:47D	0	0	3	0	0	0	0	0	0	0	0	0
1:13D	0	0	3	0	0	0	0	0	0	0	0	0
-2:30I	0	0	1	0	0	2	0	0	0	0	0	0
-13:26D	0	0	1	0	0	0	0	0	0	0	0	2
-1:27I	0	0	1	0	0	2	0	0	0	0	0	0
1:4D	0	0	1	0	0	0	0	0	2	0	0	0
-48:48D	0	0	0	1	0	2	0	0	0	0	0	0
-30:27D	0	0	0	0	3	0	0	0	0	0	0	0
-4:54D	0	0	0	0	3	0	0	0	0	0	0	0
-12:33D	0	0	0	0	3	0	0	0	0	0	0	0
-18:18D	0	0	0	0	0	1	0	0	2	0	0	0
-1:1I,2:7D	0	0	0	0	0	3	0	0	0	0	0	0
-1:4I	0	0	0	0	0	1	0	0	2	0	0	0
-13:11D	0	0	0	0	0	3	0	0	0	0	0	0
-13:42D	0	0	0	0	0	3	0	0	0	0	0	0
-2:13I	0	0	0	0	0	3	0	0	0	0	0	0
1:20D	0	0	0	0	0	3	0	0	0	0	0	0
-50:56D	0	0	0	0	0	3	0	0	0	0	0	0
-1:5D	0	0	0	0	0	2	0	1	0	0	0	0
-30:57D	0	0	0	0	0	3	0	0	0	0	0	0
-3:5D	0	0	0	0	0	0	0	0	0	0	3	0
-10:30D	0	0	0	0	0	0	0	0	0	0	0	3
-12:43D	0	0	0	0	0	0	0	0	0	0	0	3
-1:9I	0	0	0	0	0	0	0	0	0	0	0	3
-32:27D,-1:8D	0	2	0	0	0	0	0	0	0	0	0	0
-13:1D,-1:8D	0	2	0	0	0	0	0	0	0	0	0	0
-7:29D	0	1	1	0	0	0	0	0	0	0	0	0
-14:11D,-1:8D	0	2	0	0	0	0	0	0	0	0	0	0
-22:38D	0	0	2	0	0	0	0	0	0	0	0	0
-15:60D	0	0	2	0	0	0	0	0	0	0	0	0
-16:46D	0	0	2	0	0	0	0	0	0	0	0	0
-22:39D	0	0	2	0	0	0	0	0	0	0	0	0
-10:12D,5:4D	0	0	2	0	0	0	0	0	0	0	0	0
-5:13D	0	0	2	0	0	0	0	0	0	0	0	0
-22:36D	0	0	2	0	0	0	0	0	0	0	0	0
-11:12D	0	0	2	0	0	0	0	0	0	0	0	0
-2:25I	0	0	2	0	0	0	0	0	0	0	0	0
1:2D,5:9I	0	0	2	0	0	0	0	0	0	0	0	0
-31:31D	0	0	1	0	0	0	0	0	1	0	0	0
-5:6D	0	0	1	0	0	1	0	0	0	0	0	0
1:2D,5:12I	0	0	2	0	0	0	0	0	0	0	0	0
-13:15D	0	0	2	0	0	0	0	0	0	0	0	0
-47:51D	0	0	1	0	0	1	0	0	0	0	0	0
-8:17D	0	0	2	0	0	0	0	0	0	0	0	0
-1:14I	0	0	2	0	0	0	0	0	0	0	0	0
-17:32D	0	0	1	0	0	1	0	0	0	0	0	0
-21:29D	0	0	2	0	0	0	0	0	0	0	0	0
-10:12D	0	0	2	0	0	0	0	0	0	0	0	0
-6:1I,-1:8D	0	0	1	0	0	0	0	0	1	0	0	0
-10:7D	0	0	2	0	0	0	0	0	0	0	0	0
-10:41D	0	0	1	0	0	0	0	0	1	0	0	0
-24:24D	0	0	1	0	0	1	0	0	0	0	0	0
-2:1I,1:2D	0	0	0	0	2	0	0	0	0	0	0	0
-10:18D	0	0	0	0	1	1	0	0	0	0	0	0
-20:26D	0	0	0	0	0	1	0	0	0	0	0	1
-2:1I,1:2D,5:4I	0	0	0	0	0	2	0	0	0	0	0	0
-16:17D	0	0	0	0	0	2	0	0	0	0	0	0
-22:23D	0	0	0	0	0	2	0	0	0	0	0	0
-7:2D	0	0	0	0	0	1	0	0	0	0	0	1
6:3D	0	0	0	0	0	2	0	0	0	0	0	0
-2:20I	0	0	0	0	0	2	0	0	0	0	0	0
-13:14D	0	0	0	0	0	2	0	0	0	0	0	0
-1:5I,2:3I	0	0	0	0	0	2	0	0	0	0	0	0
-20:30D	0	0	0	0	0	1	0	1	0	0	0	0
-2:24D	0	0	0	0	0	2	0	0	0	0	0	0
-16:55D	0	0	0	0	0	2	0	0	0	0	0	0
-2:4I	0	0	0	0	0	2	0	0	0	0	0	0
1:2I,6:7D	0	0	0	0	0	2	0	0	0	0	0	0
-4:2D	0	0	0	0	0	2	0	0	0	0	0	0
4:10D	0	0	0	0	0	2	0	0	0	0	0	0
-2:24I,2:1I	0	0	0	0	0	2	0	0	0	0	0	0
-8:1D	0	0	0	0	0	0	1	0	0	0	0	1
-1:27D	0	0	0	0	0	0	0	2	0	0	0	0
-17:19D	0	0	0	0	0	0	0	0	2	0	0	0
-2:3D,5:13I	0	0	0	0	0	0	0	0	2	0	0	0
-17:17D	0	0	0	0	0	0	0	0	2	0	0	0
-12:37D	0	0	0	0	0	0	0	0	2	0	0	0
1:86I	0	0	0	0	0	0	0	0	2	0	0	0
-11:31D	0	0	0	0	0	0	0	0	0	0	0	2
-17:20D	0	0	0	0	0	0	0	0	0	0	0	2
1:5I	0	0	0	0	0	0	0	0	0	0	0	2
-21:21D	0	0	0	0	0	0	0	0	0	0	0	2
-10:6D	0	1	0	0	0	0	0	0	0	0	0	0
-14:33D	0	1	0	0	0	0	0	0	0	0	0	0
-13:46D	0	1	0	0	0	0	0	0	0	0	0	0
-10:35D	0	1	0	0	0	0	0	0	0	0	0	0
-19:28D	0	1	0	0	0	0	0	0	0	0	0	0
-19:18D	0	1	0	0	0	0	0	0	0	0	0	0
-1:11I,2:22I	0	1	0	0	0	0	0	0	0	0	0	0
-25:25D	0	0	1	0	0	0	0	0	0	0	0	0
-4:22D	0	0	1	0	0	0	0	0	0	0	0	0
-1:13I	0	0	1	0	0	0	0	0	0	0	0	0
1:1D,3:25I	0	0	1	0	0	0	0	0	0	0	0	0
-12:14D	0	0	1	0	0	0	0	0	0	0	0	0
-2:3D,5:15I	0	0	1	0	0	0	0	0	0	0	0	0
-49:51D	0	0	1	0	0	0	0	0	0	0	0	0
-3:14D	0	0	1	0	0	0	0	0	0	0	0	0
-6:4D,2:5I,6:5D	0	0	1	0	0	0	0	0	0	0	0	0
2:15D	0	0	1	0	0	0	0	0	0	0	0	0
-12:7D	0	0	1	0	0	0	0	0	0	0	0	0
-4:12D	0	0	1	0	0	0	0	0	0	0	0	0
-18:35D	0	0	1	0	0	0	0	0	0	0	0	0
-39:70D	0	0	1	0	0	0	0	0	0	0	0	0
-12:25D	0	0	1	0	0	0	0	0	0	0	0	0
-23:44D	0	0	1	0	0	0	0	0	0	0	0	0
-1:46I	0	0	1	0	0	0	0	0	0	0	0	0
1:1I,4:10D	0	0	1	0	0	0	0	0	0	0	0	0
1:12D	0	0	1	0	0	0	0	0	0	0	0	0
-23:26D	0	0	1	0	0	0	0	0	0	0	0	0
-1:15I	0	0	1	0	0	0	0	0	0	0	0	0
-18:24D	0	0	1	0	0	0	0	0	0	0	0	0
-8:3D,-1:2D,3:1I	0	0	1	0	0	0	0	0	0	0	0	0
-1:16I	0	0	1	0	0	0	0	0	0	0	0	0
-1:13D	0	0	1	0	0	0	0	0	0	0	0	0
-5:16D	0	0	1	0	0	0	0	0	0	0	0	0
3:30D	0	0	1	0	0	0	0	0	0	0	0	0
-1:33I	0	0	1	0	0	0	0	0	0	0	0	0
-4:2D,6:1I	0	0	1	0	0	0	0	0	0	0	0	0
-13:40D	0	0	1	0	0	0	0	0	0	0	0	0
-28:52D	0	0	1	0	0	0	0	0	0	0	0	0
-13:1D,-5:9D	0	0	0	0	1	0	0	0	0	0	0	0
-1:18I	0	0	0	0	1	0	0	0	0	0	0	0
3:11I	0	0	0	0	1	0	0	0	0	0	0	0
-5:8D	0	0	0	0	1	0	0	0	0	0	0	0
4:1D	0	0	0	0	1	0	0	0	0	0	0	0
1:1D,3:3I	0	0	0	0	1	0	0	0	0	0	0	0
-4:7D,6:2D	0	0	0	0	1	0	0	0	0	0	0	0
-2:8D	0	0	0	0	0	1	0	0	0	0	0	0
-11:21D	0	0	0	0	0	1	0	0	0	0	0	0
-3:10I	0	0	0	0	0	1	0	0	0	0	0	0
-1:29I	0	0	0	0	0	1	0	0	0	0	0	0
-15:13D	0	0	0	0	0	1	0	0	0	0	0	0
-20:49D	0	0	0	0	0	1	0	0	0	0	0	0
-11:34D	0	0	0	0	0	1	0	0	0	0	0	0
-2:11I	0	0	0	0	0	1	0	0	0	0	0	0
1:71I	0	0	0	0	0	1	0	0	0	0	0	0
-11:35D	0	0	0	0	0	1	0	0	0	0	0	0
-4:2I,1:40I	0	0	0	0	0	1	0	0	0	0	0	0
-28:28D	0	0	0	0	0	1	0	0	0	0	0	0
-23:24D	0	0	0	0	0	1	0	0	0	0	0	0
-3:13D	0	0	0	0	0	1	0	0	0	0	0	0
-1:39D	0	0	0	0	0	1	0	0	0	0	0	0
-30:36D	0	0	0	0	0	1	0	0	0	0	0	0
-9:4D,-2:2D	0	0	0	0	0	1	0	0	0	0	0	0
2:18D	0	0	0	0	0	1	0	0	0	0	0	0
-8:21D	0	0	0	0	0	1	0	0	0	0	0	0
-13:1D,2:1D	0	0	0	0	0	0	1	0	0	0	0	0
1:60I	0	0	0	0	0	0	0	1	0	0	0	0
-10:13D	0	0	0	0	0	0	0	0	1	0	0	0
-33:39D	0	0	0	0	0	0	0	0	1	0	0	0
-4:17D	0	0	0	0	0	0	0	0	1	0	0	0
-18:34D	0	0	0	0	0	0	0	0	1	0	0	0
-28:34D	0	0	0	0	0	0	0	0	0	0	1	0
-2:11D	0	0	0	0	0	0	0	0	0	0	1	0
2:9D	0	0	0	0	0	0	0	0	0	0	0	1
5:2D	0	0	0	0	0	0	0	0	0	0	0	1
Other	1	9	31	0	23	16	0	12	7	0	5	15

## Sheet: mESC_Rosa26
Sample	I.NT	I.RNP	I.RNP.unco..65mer	I.RNPD.coup..65mer	II.NT	II.RNP	II.RNP.unco..65mer	II.RNPD.coup..65mer	III.NT	III.RNP	III.RNP.unco..65mer	III.RNPD.coup..65mer
no variant	455344	482883	452985	440890	37857	49077	52493	56621	47184	54182	53888	58219
Corrected: SNV:-2C,-1T	23	22	10225	8180	5	4	920	1130	2	9	355	441
SNV:-15C	249	222	213	211	7	12	11	20	9	15	9	7
SNV:-8C	195	183	173	152	4	14	9	9	11	9	13	7
SNV:-1T	58	124	259	180	0	2	15	36	5	12	4	14
SNV:1C	30	35	76	23	43	56	48	68	59	62	39	68
SNV:1G	105	142	141	106	7	11	19	10	11	12	19	10
SNV:-15A	127	150	148	122	3	8	4	3	4	8	3	5
SNV:1T	81	172	132	64	7	12	16	14	15	25	19	13
SNV:-7C	113	119	118	99	8	12	11	14	14	13	11	9
SNV:-4C	119	101	129	110	10	9	9	13	10	9	8	11
SNV:5T	149	45	102	60	14	23	25	28	19	36	14	19
SNV:3G	82	120	109	97	6	14	7	9	8	12	7	14
SNV:-12G	87	84	81	84	15	20	12	14	13	15	15	12
SNV:4G	93	136	122	76	1	1	2	1	0	3	1	1
SNV:6T	97	50	84	53	4	19	18	26	13	26	14	15
SNV:-1G	78	120	74	79	5	11	8	11	5	10	5	9
SNV:-3G	74	75	84	68	4	7	7	14	11	17	7	11
SNV:-6C	64	88	64	77	9	12	9	15	12	14	4	5
SNV:3T	63	75	105	64	6	5	6	11	4	9	2	9
SNV:-2T	42	44	80	78	12	8	10	14	11	16	7	16
SNV:6A	70	68	57	71	6	6	7	4	8	7	11	7
SNV:-10C	64	63	58	71	6	13	9	5	5	9	8	8
SNV:4C	50	81	75	63	2	8	9	1	6	11	4	6
SNV:-14A	58	44	35	44	8	11	20	16	9	17	19	25
SNV:-8A	71	79	78	48	2	6	1	1	3	2	0	4
SNV:-2C	19	42	135	87	0	0	1	3	1	0	1	2
SNV:-10A	66	68	54	66	2	3	6	2	2	4	3	5
SNV:-17G	63	64	53	39	7	7	9	9	5	9	10	2
SNV:-13T	51	56	40	67	5	4	4	12	5	4	3	8
SNV:5A	61	42	55	53	3	7	4	6	4	6	12	5
SNV:-14T	58	54	41	39	7	2	5	9	4	11	4	7
SNV:-13A	36	26	30	25	6	19	11	23	11	21	11	17
SNV:-9A	34	35	28	21	5	14	11	23	8	14	12	16
SNV:-11A	50	47	50	49	0	6	3	4	3	2	2	2
SNV:-9T	42	40	40	40	4	2	2	8	4	5	2	3
SNV:-12C	49	55	51	32	1	0	0	2	0	1	0	0
SNV:-12T	41	42	45	40	2	2	2	2	2	4	1	2
SNV:2T	27	25	22	21	7	10	10	14	10	12	10	9
SNV:-4A	38	38	42	42	1	2	2	3	2	1	3	3
SNV:-17T	27	37	39	50	4	4	1	1	4	2	4	3
SNV:-5T	35	33	42	39	0	3	7	3	1	4	2	5
SNV:2A	21	33	58	16	0	4	5	7	4	3	10	5
SNV:-16T	33	34	39	33	3	2	5	5	2	4	0	4
SNV:-3T	36	31	35	35	2	3	5	7	2	0	2	1
SNV:-2A	16	30	58	23	3	1	7	5	3	6	1	1
SNV:-6A	22	36	22	19	3	4	7	10	10	6	9	6
SNV:-1C	29	53	37	26	0	1	1	1	1	1	2	0
SNV:4A	35	37	32	23	1	3	2	2	1	1	0	4
SNV:-17C	38	30	41	21	1	1	0	0	1	0	2	1
SNV:-5A	17	14	17	13	5	8	6	13	4	11	13	14
SNV:-8G	20	27	22	19	3	8	4	5	8	7	4	8
SNV:-11T	24	24	7	18	7	6	4	9	3	7	5	3
SNV:6C	24	22	26	24	2	2	2	1	1	0	0	1
SNV:3C	33	22	23	17	0	0	0	0	0	0	2	0
SNV:-7A	20	18	24	13	1	0	4	1	1	2	5	3
SNV:-16A	6	18	12	4	3	4	11	8	4	2	9	11
SNV:-2T,-1T	4	0	27	40	0	0	1	1	0	1	2	1
SNV:-3C	13	23	24	11	0	0	2	0	2	0	1	1
SNV:-10G	14	13	14	12	0	0	0	2	0	2	0	0
SNV:5C	8	13	7	13	2	0	3	0	1	4	1	0
SNV:-16T,-2C,-1T	0	0	52	0	0	0	0	0	0	0	0	0
SNV:-15G	6	11	9	10	0	1	1	2	1	0	0	3
SNV:2C	13	11	7	6	1	0	0	1	1	0	1	1
SNV:-2T,-1C	0	18	22	1	0	0	0	0	0	0	0	0
SNV:-9G	6	6	11	8	1	2	1	2	0	0	1	2
SNV:4A,5A	0	0	33	0	0	0	0	6	0	0	0	0
SNV:-7G	6	9	4	8	1	2	2	3	1	1	1	0
SNV:-2C,-1C	0	0	33	2	0	0	0	0	0	0	0	0
SNV:-13G	4	7	3	8	0	2	3	3	2	0	0	2
SNV:-3T,-2C,-1T	0	0	2	28	0	0	2	1	0	0	0	0
SNV:-5G	4	10	3	7	1	0	0	2	0	2	0	2
SNV:-14G	10	6	3	5	0	1	1	0	0	0	0	2
SNV:1T,3G	1	10	11	2	0	0	0	0	0	0	0	0
SNV:3G,4G	1	6	10	5	0	0	0	0	0	0	0	0
SNV:-3T,-2T,-1C	0	18	0	0	0	2	0	0	0	0	0	2
SNV:-4G	8	4	3	3	0	0	0	1	0	0	1	1
SNV:-6G	2	4	10	2	2	0	0	0	0	0	1	0
SNV:1G,2C	0	21	0	0	0	0	0	0	0	0	0	0
SNV:-11C	6	3	3	2	2	0	3	1	0	0	0	0
SNV:1G,2A	0	1	18	0	0	0	1	0	0	0	0	0
SNV:-3T,-2T,-1T	0	16	0	0	0	0	4	0	0	0	0	0
SNV:-3C,-2T	0	1	16	0	0	0	0	0	0	0	0	0
SNV:1T,4G	3	6	6	1	0	0	0	0	0	0	0	0
SNV:-16G	1	2	2	3	1	0	2	0	3	1	1	0
SNV:1G,2T,3T	0	16	0	0	0	0	0	0	0	0	0	0
SNV:5T,6T	4	5	6	0	0	0	0	0	0	0	0	0
SNV:1G,3T	2	3	5	4	0	0	1	0	0	0	0	0
SNV:-4A,-3C,-2T,-1C	0	15	0	0	0	0	0	0	0	0	0	0
SNV:-9T,-2C,-1T	0	0	15	0	0	0	0	0	0	0	0	0
SNV:-15A,-8A	2	6	3	3	0	0	0	0	0	0	0	0
SNV:-15C,-8A	4	4	5	0	0	0	0	0	0	0	0	1
SNV:-2A,-1C,1T	0	13	0	0	0	0	0	0	0	0	0	0
SNV:3G,6C	9	2	0	1	0	0	0	0	0	0	0	0
SNV:-4C,-3C,-1C	0	12	0	0	0	0	0	0	0	0	0	0
SNV:-15A,3T	3	5	2	0	0	0	0	0	1	0	0	0
SNV:1G,4G	3	5	2	1	0	0	0	0	0	0	0	0
SNV:3T,4G	3	5	2	1	0	0	0	0	0	0	0	0
SNV:-15C,3G	2	6	2	1	0	0	0	0	0	0	0	0
SNV:1T,2T	0	10	0	1	0	0	0	0	0	0	0	0
SNV:1C,2T	1	2	5	1	0	0	0	0	0	0	0	1
SNV:-3T,-2T	0	10	0	0	0	0	0	0	0	0	0	0
SNV:-15C,4G	6	1	0	2	0	0	0	0	0	0	0	0
SNV:2A,3G	0	5	4	0	0	0	0	0	0	0	0	0
SNV:-15A,-8C	1	4	2	1	0	0	0	0	0	0	0	0
SNV:1G,2A,4A	0	8	0	0	0	0	0	0	0	0	0	0
SNV:-2C,-1T,4G	0	1	3	4	0	0	0	0	0	0	0	0
SNV:-8C,-2C,-1T	0	0	4	3	0	0	0	0	0	0	0	1
SNV:-15C,-2C,-1T	0	0	4	4	0	0	0	0	0	0	0	0
SNV:-2C,-1G	0	0	4	4	0	0	0	0	0	0	0	0
SNV:1C,3G	0	0	1	0	1	0	1	1	1	0	2	1
SNV:-15C,-8C	2	0	4	1	0	0	0	0	0	0	0	0
SNV:-15A,6T	3	2	1	1	0	0	0	0	0	0	0	0
SNV:4G,6C	1	3	1	2	0	0	0	0	0	0	0	0
SNV:2T,5T	3	0	1	2	0	0	0	0	0	0	0	0
SNV:-15A,-12C	1	3	1	1	0	0	0	0	0	0	0	0
SNV:1G,3T,4G	2	1	2	1	0	0	0	0	0	0	0	0
SNV:-2A,-1T	1	1	3	1	0	0	0	0	0	0	0	0
SNV:3G,4A	1	4	1	0	0	0	0	0	0	0	0	0
SNV:-7C,-2C,-1T	0	0	4	2	0	0	0	0	0	0	0	0
SNV:-12C,1C	1	0	1	3	0	0	0	0	0	0	0	0
SNV:-15A,-11T	1	1	1	2	0	0	0	0	0	0	0	0
SNV:-15A,-8G	1	0	3	1	0	0	0	0	0	0	0	0
SNV:-15A,-2T	2	1	1	1	0	0	0	0	0	0	0	0
SNV:-1G,1C	2	1	2	0	0	0	0	0	0	0	0	0
SNV:1G,3G	1	2	1	1	0	0	0	0	0	0	0	0
SNV:-12C,4G	1	1	2	1	0	0	0	0	0	0	0	0
SNV:2T,6A	1	1	3	0	0	0	0	0	0	0	0	0
SNV:3G,6T	1	1	1	1	0	0	1	0	0	0	0	0
SNV:-1G,3G	1	1	0	2	0	1	0	0	0	0	0	0
SNV:1T,5C	2	1	1	1	0	0	0	0	0	0	0	0
SNV:-15C,-8G	1	3	1	0	0	0	0	0	0	0	0	0
SNV:-15C,2A	0	3	0	2	0	0	0	0	0	0	0	0
SNV:-5A,-2C,-1T	0	0	4	0	0	0	1	0	0	0	0	0
SNV:-4A,-2C,-1T	0	0	1	0	0	0	0	0	0	0	1	3
SNV:-4C,-2C,-1T	0	0	4	1	0	0	0	0	0	0	0	0
SNV:-15A,-2C,-1T	0	0	2	3	0	0	0	0	0	0	0	0
SNV:-2C,-1T,1G	0	0	0	2	0	0	0	2	0	0	1	0
SNV:-1C,1C,2T	0	0	0	0	0	0	0	5	0	0	0	0
SNV:-16T,5T,6T	1	1	0	2	0	0	0	0	0	0	0	0
SNV:-17C,-15C	2	1	0	1	0	0	0	0	0	0	0	0
SNV:-10G,-8C	1	1	0	2	0	0	0	0	0	0	0	0
SNV:-17C,4G	1	3	0	0	0	0	0	0	0	0	0	0
SNV:-2C,-1T,1T	1	0	2	1	0	0	0	0	0	0	0	0
SNV:1C,3T	2	0	2	0	0	0	0	0	0	0	0	0
SNV:-10A,-2T	3	0	1	0	0	0	0	0	0	0	0	0
SNV:4G,5T	2	2	0	0	0	0	0	0	0	0	0	0
SNV:3T,5T	1	0	2	1	0	0	0	0	0	0	0	0
SNV:-1G,3T	1	0	0	0	0	3	0	0	0	0	0	0
SNV:-14A,-9A	1	1	1	0	0	0	0	1	0	0	0	0
SNV:-2C,-1T,6T	1	0	2	0	0	0	0	1	0	0	0	0
SNV:-8C,3T	0	3	1	0	0	0	0	0	0	0	0	0
SNV:-2T,6T	0	4	0	0	0	0	0	0	0	0	0	0
SNV:1T,3G,4G	0	3	1	0	0	0	0	0	0	0	0	0
SNV:-2C,-1T,5T	0	0	3	0	0	0	0	1	0	0	0	0
SNV:-2C,-1T,4C	0	0	3	1	0	0	0	0	0	0	0	0
SNV:-12C,-2C,-1T	0	0	4	0	0	0	0	0	0	0	0	0
SNV:-10A,-2C,-1T	0	0	1	3	0	0	0	0	0	0	0	0
SNV:-9A,-2C,-1T	0	0	1	1	0	0	1	0	0	0	0	1
SNV:-17G,-2C,-1T	0	0	1	0	0	0	0	1	0	0	2	0
SNV:1C,2T,3G	0	0	0	0	0	0	4	0	0	0	0	0
SNV:-3T,4C	2	1	0	0	0	0	0	0	0	0	0	0
SNV:-1T,3C	1	0	2	0	0	0	0	0	0	0	0	0
SNV:3G,5T	2	0	1	0	0	0	0	0	0	0	0	0
SNV:-7C,6C	2	0	1	0	0	0	0	0	0	0	0	0
SNV:-15A,-6A	1	0	0	0	0	0	1	0	1	0	0	0
SNV:-15A,-11A	1	1	0	1	0	0	0	0	0	0	0	0
SNV:-8A,3T	2	1	0	0	0	0	0	0	0	0	0	0
SNV:5T,6C	1	1	1	0	0	0	0	0	0	0	0	0
SNV:-9A,4G	1	1	1	0	0	0	0	0	0	0	0	0
SNV:-12C,1G	1	1	1	0	0	0	0	0	0	0	0	0
SNV:1T,4G,5C	1	1	0	1	0	0	0	0	0	0	0	0
SNV:-8C,4A	1	0	1	1	0	0	0	0	0	0	0	0
SNV:-1T,4C	1	0	1	1	0	0	0	0	0	0	0	0
SNV:-10G,-7C	1	1	1	0	0	0	0	0	0	0	0	0
SNV:-15C,3T	2	0	1	0	0	0	0	0	0	0	0	0
SNV:-15C,-12C	2	0	1	0	0	0	0	0	0	0	0	0
SNV:4C,6T	1	1	1	0	0	0	0	0	0	0	0	0
SNV:-12C,3G	2	0	1	0	0	0	0	0	0	0	0	0
SNV:-8A,4G	1	1	0	1	0	0	0	0	0	0	0	0
SNV:-17C,-12C	2	1	0	0	0	0	0	0	0	0	0	0
SNV:-10A,-9A	1	2	0	0	0	0	0	0	0	0	0	0
SNV:-17C,-3G	2	1	0	0	0	0	0	0	0	0	0	0
SNV:-10A,3G	2	1	0	0	0	0	0	0	0	0	0	0
SNV:-17C,-3C	1	1	0	1	0	0	0	0	0	0	0	0
SNV:-1G,1G	1	0	1	1	0	0	0	0	0	0	0	0
SNV:5A,6T	0	1	1	1	0	0	0	0	0	0	0	0
SNV:-6C,4G	0	1	1	1	0	0	0	0	0	0	0	0
SNV:-6C,1C	0	1	1	1	0	0	0	0	0	0	0	0
SNV:-13A,-9A	0	2	0	0	0	0	0	0	0	1	0	0
SNV:-7G,-4C	0	2	1	0	0	0	0	0	0	0	0	0
SNV:-1C,4C	0	1	2	0	0	0	0	0	0	0	0	0
SNV:3T,6T	0	2	1	0	0	0	0	0	0	0	0	0
SNV:-9A,-8C	0	3	0	0	0	0	0	0	0	0	0	0
SNV:3G,5C	0	2	1	0	0	0	0	0	0	0	0	0
SNV:-10C,-6C	0	1	2	0	0	0	0	0	0	0	0	0
SNV:1C,4G	0	1	1	0	0	0	0	0	0	1	0	0
SNV:1T,4C	0	2	1	0	0	0	0	0	0	0	0	0
SNV:2T,3T	0	1	2	0	0	0	0	0	0	0	0	0
SNV:1T,3C	0	0	2	1	0	0	0	0	0	0	0	0
SNV:-15C,3C	0	0	1	2	0	0	0	0	0	0	0	0
SNV:-2C,-1T,6A	0	0	1	2	0	0	0	0	0	0	0	0
SNV:-6C,-2C,-1T	0	0	0	2	0	0	0	1	0	0	0	0
SNV:1T,3G,4A,5T	0	0	0	0	0	0	3	0	0	0	0	0
SNV:-1T,4A,5A	0	0	0	0	0	0	0	3	0	0	0	0
SNV:-17C,-16T,5T,6T	1	0	0	1	0	0	0	0	0	0	0	0
SNV:-15A,-6C	1	1	0	0	0	0	0	0	0	0	0	0
SNV:-4C,3G	1	1	0	0	0	0	0	0	0	0	0	0
SNV:-10G,1T	1	0	0	1	0	0	0	0	0	0	0	0
SNV:-4C,1G	1	1	0	0	0	0	0	0	0	0	0	0
SNV:-14A,-10A,4G	1	0	0	1	0	0	0	0	0	0	0	0
SNV:2T,6C	1	1	0	0	0	0	0	0	0	0	0	0
SNV:-15C,6C	1	0	1	0	0	0	0	0	0	0	0	0
SNV:-12C,-8C	1	0	0	1	0	0	0	0	0	0	0	0
SNV:3C,4G	1	1	0	0	0	0	0	0	0	0	0	0
SNV:-4C,4G	1	0	1	0	0	0	0	0	0	0	0	0
SNV:-10C,-3G	1	0	1	0	0	0	0	0	0	0	0	0
SNV:-6C,1T	1	1	0	0	0	0	0	0	0	0	0	0
SNV:-15C,-3G	1	0	1	0	0	0	0	0	0	0	0	0
SNV:-17C,6T	1	0	0	1	0	0	0	0	0	0	0	0
SNV:-15A,4G	1	1	0	0	0	0	0	0	0	0	0	0
SNV:-15C,-1G	1	1	0	0	0	0	0	0	0	0	0	0
SNV:-15A,1T	2	0	0	0	0	0	0	0	0	0	0	0
SNV:-17G,-15A	1	1	0	0	0	0	0	0	0	0	0	0
SNV:-2T,6A	1	0	1	0	0	0	0	0	0	0	0	0
SNV:-3G,4G	1	0	0	1	0	0	0	0	0	0	0	0
SNV:-15C,3T,4G	1	0	0	1	0	0	0	0	0	0	0	0
SNV:-17C,-12T,-6C,1G	1	0	1	0	0	0	0	0	0	0	0	0
SNV:-3C,-1C	2	0	0	0	0	0	0	0	0	0	0	0
SNV:-1T,6C	1	1	0	0	0	0	0	0	0	0	0	0
SNV:1T,2C	1	0	0	1	0	0	0	0	0	0	0	0
SNV:-17C,-9A	1	0	1	0	0	0	0	0	0	0	0	0
SNV:-10G,-3G	1	0	0	1	0	0	0	0	0	0	0	0
SNV:-8A,3G	1	1	0	0	0	0	0	0	0	0	0	0
SNV:-10C,4G	1	0	1	0	0	0	0	0	0	0	0	0
SNV:-8C,-7C	1	1	0	0	0	0	0	0	0	0	0	0
SNV:-15A,-14A	1	0	1	0	0	0	0	0	0	0	0	0
SNV:2C,5T	1	0	1	0	0	0	0	0	0	0	0	0
SNV:-1G,4G	1	1	0	0	0	0	0	0	0	0	0	0
SNV:-8C,-4C	1	1	0	0	0	0	0	0	0	0	0	0
SNV:-15A,-5A	1	1	0	0	0	0	0	0	0	0	0	0
SNV:1T,3G,5C	1	1	0	0	0	0	0	0	0	0	0	0
SNV:-12C,2T	1	1	0	0	0	0	0	0	0	0	0	0
SNV:4G,6T	1	0	0	1	0	0	0	0	0	0	0	0
SNV:2T,3C	1	0	1	0	0	0	0	0	0	0	0	0
SNV:-3G,-2A	1	1	0	0	0	0	0	0	0	0	0	0
SNV:-12G,-8C	1	0	1	0	0	0	0	0	0	0	0	0
SNV:-16A,-15C	1	0	1	0	0	0	0	0	0	0	0	0
SNV:2T,3G	1	0	0	0	0	0	0	0	0	0	1	0
SNV:-17C,-16T,3T,5T,6T	0	1	1	0	0	0	0	0	0	0	0	0
SNV:1C,6T	0	1	1	0	0	0	0	0	0	0	0	0
SNV:-15A,-9A	0	1	1	0	0	0	0	0	0	0	0	0
SNV:-7A,-5A	0	1	0	0	0	0	0	0	1	0	0	0
SNV:-6C,2A	0	2	0	0	0	0	0	0	0	0	0	0
SNV:-2T,5T	0	2	0	0	0	0	0	0	0	0	0	0
SNV:-17C,-7C	0	2	0	0	0	0	0	0	0	0	0	0
SNV:-1G,2T	0	1	1	0	0	0	0	0	0	0	0	0
SNV:-14A,-10A	0	1	0	1	0	0	0	0	0	0	0	0
SNV:-10C,-3C	0	1	1	0	0	0	0	0	0	0	0	0
SNV:1T,2A	0	1	1	0	0	0	0	0	0	0	0	0
SNV:-15A,-4C	0	1	1	0	0	0	0	0	0	0	0	0
SNV:-8A,-7C	0	1	0	1	0	0	0	0	0	0	0	0
SNV:1C,3C	0	1	0	1	0	0	0	0	0	0	0	0
SNV:-15C,-10C	0	2	0	0	0	0	0	0	0	0	0	0
SNV:-15C,-10G,-4C	0	1	0	1	0	0	0	0	0	0	0	0
SNV:-9A,6T	0	1	1	0	0	0	0	0	0	0	0	0
SNV:-10G,6T	0	1	0	0	0	0	0	0	0	1	0	0
SNV:-8G,-7C	0	2	0	0	0	0	0	0	0	0	0	0
SNV:-10G,-8C,-4A	0	1	1	0	0	0	0	0	0	0	0	0
SNV:1G,5T	0	1	1	0	0	0	0	0	0	0	0	0
SNV:-11A,3T	0	1	1	0	0	0	0	0	0	0	0	0
SNV:-14A,-11A	0	1	0	0	0	1	0	0	0	0	0	0
SNV:-3G,-1C	0	2	0	0	0	0	0	0	0	0	0	0
SNV:-10G,-8G	0	1	0	1	0	0	0	0	0	0	0	0
SNV:-10G,-6C	0	1	0	1	0	0	0	0	0	0	0	0
SNV:-1T,1G	0	1	0	1	0	0	0	0	0	0	0	0
SNV:-10A,5T	0	1	1	0	0	0	0	0	0	0	0	0
SNV:-11T,1T	0	1	0	0	1	0	0	0	0	0	0	0
SNV:-15C,-13A	0	2	0	0	0	0	0	0	0	0	0	0
SNV:-14A,-13A	0	1	0	0	0	0	0	0	0	0	0	1
SNV:1T,2A,3G	0	1	1	0	0	0	0	0	0	0	0	0
SNV:-15C,-12C,-11A	0	1	1	0	0	0	0	0	0	0	0	0
SNV:-10G,-2T	0	1	1	0	0	0	0	0	0	0	0	0
SNV:-15A,-3G	0	1	1	0	0	0	0	0	0	0	0	0
SNV:-2T,4G	0	1	1	0	0	0	0	0	0	0	0	0
SNV:-11C,-2T	0	1	0	1	0	0	0	0	0	0	0	0
SNV:-8C,6C	0	1	0	1	0	0	0	0	0	0	0	0
SNV:-17C,1G	0	1	0	1	0	0	0	0	0	0	0	0
SNV:-11C,-4C	0	1	0	1	0	0	0	0	0	0	0	0
SNV:-11T,3C	0	1	0	0	0	0	0	0	1	0	0	0
SNV:-2T,-1G	0	1	1	0	0	0	0	0	0	0	0	0
SNV:-15C,4A	0	1	1	0	0	0	0	0	0	0	0	0
SNV:2A,4G	0	1	1	0	0	0	0	0	0	0	0	0
SNV:-7C,-4C	0	0	2	0	0	0	0	0	0	0	0	0
SNV:-15C,-10C,-6C	0	0	1	1	0	0	0	0	0	0	0	0
SNV:-3C,-2C,-1T	0	0	2	0	0	0	0	0	0	0	0	0
SNV:-10C,-7C	0	0	1	0	0	0	0	0	1	0	0	0
SNV:-10G,4G	0	0	2	0	0	0	0	0	0	0	0	0
SNV:-2C,-1T,5A	0	0	1	1	0	0	0	0	0	0	0	0
SNV:-14A,-2C,-1T	0	0	1	0	0	0	0	1	0	0	0	0
SNV:-8G,-2C,-1T	0	0	2	0	0	0	0	0	0	0	0	0
SNV:-2C,-1T,4A	0	0	1	1	0	0	0	0	0	0	0	0
SNV:-7C,-1C	0	0	2	0	0	0	0	0	0	0	0	0
SNV:1C,4C	0	0	2	0	0	0	0	0	0	0	0	0
SNV:-12C,3C,4G	0	0	2	0	0	0	0	0	0	0	0	0
SNV:-6C,-2T	0	0	2	0	0	0	0	0	0	0	0	0
SNV:-2C,-1T,2A	0	0	1	0	0	0	0	1	0	0	0	0
SNV:-2C,-1T,1C	0	0	1	0	0	0	1	0	0	0	0	0
SNV:-5T,1G	0	0	1	0	0	0	0	0	0	0	0	1
SNV:-1T,3G	0	0	2	0	0	0	0	0	0	0	0	0
SNV:-17G,-2T,4G	0	0	2	0	0	0	0	0	0	0	0	0
SNV:-17C,4C	0	0	1	1	0	0	0	0	0	0	0	0
SNV:-2C,-1T,3T	0	0	1	1	0	0	0	0	0	0	0	0
SNV:-6A,5A	0	0	1	0	0	0	0	1	0	0	0	0
SNV:-14T,-2C,-1T	0	0	1	1	0	0	0	0	0	0	0	0
SNV:-16A,-2C,-1T	0	0	1	0	0	0	0	1	0	0	0	0
SNV:-13A,-11A	0	0	1	0	0	0	0	0	0	1	0	0
SNV:-14G,-2C,-1T	0	0	1	1	0	0	0	0	0	0	0	0
SNV:3C,6T	0	0	1	1	0	0	0	0	0	0	0	0
SNV:-1T,6T	0	0	2	0	0	0	0	0	0	0	0	0
SNV:2C,6T	0	0	0	2	0	0	0	0	0	0	0	0
SNV:-12C,-10G	0	0	0	2	0	0	0	0	0	0	0	0
SNV:2A,4A,5A	0	0	0	2	0	0	0	0	0	0	0	0
SNV:-3G,-2C,-1T	0	0	0	2	0	0	0	0	0	0	0	0
SNV:-2T,2C,6C	0	0	0	2	0	0	0	0	0	0	0	0
SNV:-2C,-1T,3G	0	0	0	2	0	0	0	0	0	0	0	0
SNV:-15C,-5A	0	0	0	1	1	0	0	0	0	0	0	0
SNV:-4C,-3T,-2C,-1C	0	0	0	1	0	0	1	0	0	0	0	0
SNV:-16A,-14A,-13A	0	0	0	1	0	0	0	0	0	0	1	0
SNV:4C,5T	0	0	0	0	0	0	2	0	0	0	0	0
SNV:-14T,-5G	0	0	0	0	0	0	1	0	0	1	0	0
SNV:-2C,-1T,2T	0	0	0	0	0	0	0	2	0	0	0	0
SNV:-14T,1T	0	0	0	0	0	0	0	0	0	0	2	0
SNV:-17C,-16T,2T,3T,5A,6T	1	0	0	0	0	0	0	0	0	0	0	0
SNV:3T,5T,6T	1	0	0	0	0	0	0	0	0	0	0	0
SNV:-17C,3T,5T,6T	1	0	0	0	0	0	0	0	0	0	0	0
SNV:-17C,-16T,2T,6T	1	0	0	0	0	0	0	0	0	0	0	0
SNV:-16T,-15G,-8G	1	0	0	0	0	0	0	0	0	0	0	0
SNV:-12C,2C,4G,5T,6C	1	0	0	0	0	0	0	0	0	0	0	0
SNV:-16A,-12G,-6C,6T	1	0	0	0	0	0	0	0	0	0	0	0
SNV:-3G,4A	1	0	0	0	0	0	0	0	0	0	0	0
SNV:-15C,3C,5T,6C	1	0	0	0	0	0	0	0	0	0	0	0
SNV:2A,6T	1	0	0	0	0	0	0	0	0	0	0	0
SNV:-12C,-4G,-1T,5T,6C	1	0	0	0	0	0	0	0	0	0	0	0
SNV:-16A,-12C,-7C	1	0	0	0	0	0	0	0	0	0	0	0
SNV:-17C,-1C	1	0	0	0	0	0	0	0	0	0	0	0
SNV:-10G,-8A,-3C,1C,2T,3T,4C	1	0	0	0	0	0	0	0	0	0	0	0
SNV:-2A,-1G	1	0	0	0	0	0	0	0	0	0	0	0
SNV:-7C,-2T,-1C	1	0	0	0	0	0	0	0	0	0	0	0
SNV:-15G,-14A,-11T,-10G,3C	1	0	0	0	0	0	0	0	0	0	0	0
SNV:-14A,-10A,-1C	1	0	0	0	0	0	0	0	0	0	0	0
SNV:-3C,3T	1	0	0	0	0	0	0	0	0	0	0	0
SNV:-17G,-15C,-12C,-11C,-4C,3T	1	0	0	0	0	0	0	0	0	0	0	0
SNV:-12C,-3C,1C	1	0	0	0	0	0	0	0	0	0	0	0
SNV:-9G,-8C	1	0	0	0	0	0	0	0	0	0	0	0
SNV:-6C,-5G,2C	1	0	0	0	0	0	0	0	0	0	0	0
SNV:-10A,-2T,3G	1	0	0	0	0	0	0	0	0	0	0	0
SNV:-3G,1C,3G	1	0	0	0	0	0	0	0	0	0	0	0
SNV:-1G,6T	1	0	0	0	0	0	0	0	0	0	0	0
SNV:-15C,-6G	1	0	0	0	0	0	0	0	0	0	0	0
SNV:-15C,-12C,-11A,3G	1	0	0	0	0	0	0	0	0	0	0	0
SNV:-15C,-12C,-2T,2T,4G	1	0	0	0	0	0	0	0	0	0	0	0
SNV:-11C,6T	1	0	0	0	0	0	0	0	0	0	0	0
SNV:1G,3C,4A	1	0	0	0	0	0	0	0	0	0	0	0
SNV:-8G,-7G,-6A	1	0	0	0	0	0	0	0	0	0	0	0
SNV:-15C,-10C,-6C,2A,4G	1	0	0	0	0	0	0	0	0	0	0	0
SNV:-5A,1C	1	0	0	0	0	0	0	0	0	0	0	0
SNV:-16A,-15G,-2A,4G	1	0	0	0	0	0	0	0	0	0	0	0
SNV:-15A,-7C,-1T,2C,6A	1	0	0	0	0	0	0	0	0	0	0	0
SNV:-12C,-7C,-1T,1G	1	0	0	0	0	0	0	0	0	0	0	0
SNV:-2T,1C	1	0	0	0	0	0	0	0	0	0	0	0
SNV:-6C,-5A,-4G,-1G,1C,3G,4G	1	0	0	0	0	0	0	0	0	0	0	0
SNV:-12C,-2A,1G,4G,6C	1	0	0	0	0	0	0	0	0	0	0	0
SNV:-3C,-1G	1	0	0	0	0	0	0	0	0	0	0	0
SNV:-12G,-6C,4G	1	0	0	0	0	0	0	0	0	0	0	0
SNV:-14T,-9A,-1T	1	0	0	0	0	0	0	0	0	0	0	0
SNV:-11A,6T	1	0	0	0	0	0	0	0	0	0	0	0
SNV:2T,6T	1	0	0	0	0	0	0	0	0	0	0	0
SNV:-16A,-2C,-1T,2T,4G,6A	1	0	0	0	0	0	0	0	0	0	0	0
SNV:5C,6T	1	0	0	0	0	0	0	0	0	0	0	0
SNV:-10C,-7G,3C	1	0	0	0	0	0	0	0	0	0	0	0
SNV:-15A,3C	1	0	0	0	0	0	0	0	0	0	0	0
SNV:-14A,5T	1	0	0	0	0	0	0	0	0	0	0	0
SNV:-7C,-6A,-4C	1	0	0	0	0	0	0	0	0	0	0	0
SNV:-15A,-14A,-11A,-10G,-8G	1	0	0	0	0	0	0	0	0	0	0	0
SNV:-16A,1T	1	0	0	0	0	0	0	0	0	0	0	0
SNV:-14A,-11T,-10C,-7G	1	0	0	0	0	0	0	0	0	0	0	0
SNV:-6C,-3C,1C	1	0	0	0	0	0	0	0	0	0	0	0
SNV:-17G,-6C	1	0	0	0	0	0	0	0	0	0	0	0
SNV:-10G,-8C,-7C,-2T	1	0	0	0	0	0	0	0	0	0	0	0
SNV:-17G,1G	1	0	0	0	0	0	0	0	0	0	0	0
SNV:-16A,-10G,3G	1	0	0	0	0	0	0	0	0	0	0	0
SNV:-15A,-7G	1	0	0	0	0	0	0	0	0	0	0	0
SNV:-15C,-12G,-11T,-10C	1	0	0	0	0	0	0	0	0	0	0	0
SNV:-7A,-2T	1	0	0	0	0	0	0	0	0	0	0	0
SNV:-10G,-3T	1	0	0	0	0	0	0	0	0	0	0	0
SNV:-4G,5T	1	0	0	0	0	0	0	0	0	0	0	0
SNV:-10G,-7C,4C	1	0	0	0	0	0	0	0	0	0	0	0
SNV:-17C,-3G,4G	1	0	0	0	0	0	0	0	0	0	0	0
SNV:-4A,5C	1	0	0	0	0	0	0	0	0	0	0	0
SNV:-16A,-1T	1	0	0	0	0	0	0	0	0	0	0	0
SNV:-17T,-12T,-4G	1	0	0	0	0	0	0	0	0	0	0	0
SNV:-9A,-8G	1	0	0	0	0	0	0	0	0	0	0	0
SNV:-17C,-2C	1	0	0	0	0	0	0	0	0	0	0	0
SNV:-1T,1C,3T,4G	1	0	0	0	0	0	0	0	0	0	0	0
SNV:-16G,-15G,-12C,-7G,-3C,-1T,1C,4G,5T	1	0	0	0	0	0	0	0	0	0	0	0
SNV:-17C,-3G,1T	1	0	0	0	0	0	0	0	0	0	0	0
SNV:-15A,-10A,-9A	1	0	0	0	0	0	0	0	0	0	0	0
SNV:-14T,-1T	1	0	0	0	0	0	0	0	0	0	0	0
SNV:-15C,-6C	1	0	0	0	0	0	0	0	0	0	0	0
SNV:-15A,-1C	1	0	0	0	0	0	0	0	0	0	0	0
SNV:-13G,-10G,-8C	1	0	0	0	0	0	0	0	0	0	0	0
SNV:-16G,-15A,-8G,-3G	1	0	0	0	0	0	0	0	0	0	0	0
SNV:-13A,-3G,4G	1	0	0	0	0	0	0	0	0	0	0	0
SNV:-17C,-15A	1	0	0	0	0	0	0	0	0	0	0	0
SNV:5C,6C	1	0	0	0	0	0	0	0	0	0	0	0
SNV:-15C,-12C,1C,3T	1	0	0	0	0	0	0	0	0	0	0	0
SNV:-5G,6T	1	0	0	0	0	0	0	0	0	0	0	0
SNV:-12C,-7G,3C	1	0	0	0	0	0	0	0	0	0	0	0
SNV:-3T,-1T,2C,3C,5T,6C	1	0	0	0	0	0	0	0	0	0	0	0
SNV:-15C,-12C,-3C,4G	1	0	0	0	0	0	0	0	0	0	0	0
SNV:-10C,-9T	1	0	0	0	0	0	0	0	0	0	0	0
SNV:-15C,-13A,-9G,2C,3G,6C	1	0	0	0	0	0	0	0	0	0	0	0
SNV:-5G,2C,6T	1	0	0	0	0	0	0	0	0	0	0	0
SNV:-11A,-3G,-1T,1G,3C,6C	1	0	0	0	0	0	0	0	0	0	0	0
SNV:-15A,-8G,4G	1	0	0	0	0	0	0	0	0	0	0	0
SNV:-6G,-3G	1	0	0	0	0	0	0	0	0	0	0	0
SNV:-17C,-6C,-2C	1	0	0	0	0	0	0	0	0	0	0	0
SNV:3C,5T	1	0	0	0	0	0	0	0	0	0	0	0
SNV:-17G,-15C,-7G,-1G	1	0	0	0	0	0	0	0	0	0	0	0
SNV:-3G,1T,6A	1	0	0	0	0	0	0	0	0	0	0	0
SNV:-3T,5C	1	0	0	0	0	0	0	0	0	0	0	0
SNV:-17G,-4G,-1T	1	0	0	0	0	0	0	0	0	0	0	0
SNV:-16A,1G,5T	1	0	0	0	0	0	0	0	0	0	0	0
SNV:-13T,6C	1	0	0	0	0	0	0	0	0	0	0	0
SNV:-17C,-15C,-12G,-10C,-8C,-1G,6C	1	0	0	0	0	0	0	0	0	0	0	0
SNV:-15A,1T,6T	1	0	0	0	0	0	0	0	0	0	0	0
SNV:-6A,6T	1	0	0	0	0	0	0	0	0	0	0	0
SNV:-17C,-15C,-11T,-9T	1	0	0	0	0	0	0	0	0	0	0	0
SNV:1T,6T	1	0	0	0	0	0	0	0	0	0	0	0
SNV:-12T,6A	1	0	0	0	0	0	0	0	0	0	0	0
SNV:-7C,-2A,2T,6C	1	0	0	0	0	0	0	0	0	0	0	0
SNV:-12C,-11T	1	0	0	0	0	0	0	0	0	0	0	0
SNV:-12T,-10C,-5A,-3G,2T,3C	1	0	0	0	0	0	0	0	0	0	0	0
SNV:-6C,4C	1	0	0	0	0	0	0	0	0	0	0	0
SNV:-1G,2C	1	0	0	0	0	0	0	0	0	0	0	0
SNV:-4C,4C	1	0	0	0	0	0	0	0	0	0	0	0
SNV:-13A,-12T	1	0	0	0	0	0	0	0	0	0	0	0
SNV:-14A,3G,6C	1	0	0	0	0	0	0	0	0	0	0	0
SNV:-10A,3C	1	0	0	0	0	0	0	0	0	0	0	0
SNV:-11C,-9T,-2T,1T	1	0	0	0	0	0	0	0	0	0	0	0
SNV:4G,6A	1	0	0	0	0	0	0	0	0	0	0	0
SNV:-11A,3G	1	0	0	0	0	0	0	0	0	0	0	0
SNV:-11A,-1T	1	0	0	0	0	0	0	0	0	0	0	0
SNV:-8C,1T,3T	1	0	0	0	0	0	0	0	0	0	0	0
SNV:-14A,-13A,-11T,5T,6T	1	0	0	0	0	0	0	0	0	0	0	0
SNV:-8C,3T,4G	1	0	0	0	0	0	0	0	0	0	0	0
SNV:-15C,-14A,-2T,3C	1	0	0	0	0	0	0	0	0	0	0	0
SNV:-12C,3C	1	0	0	0	0	0	0	0	0	0	0	0
SNV:-15C,-14T	1	0	0	0	0	0	0	0	0	0	0	0
SNV:-8A,5C	1	0	0	0	0	0	0	0	0	0	0	0
SNV:-10A,-6G	1	0	0	0	0	0	0	0	0	0	0	0
SNV:-5A,1G	1	0	0	0	0	0	0	0	0	0	0	0
SNV:-1T,2T	1	0	0	0	0	0	0	0	0	0	0	0
SNV:-11A,-4C	1	0	0	0	0	0	0	0	0	0	0	0
SNV:-3C,-2C,-1T,4G	1	0	0	0	0	0	0	0	0	0	0	0
SNV:-2A,2T,5T,6T	1	0	0	0	0	0	0	0	0	0	0	0
SNV:-17G,-1T	1	0	0	0	0	0	0	0	0	0	0	0
SNV:-12C,-1T	1	0	0	0	0	0	0	0	0	0	0	0
SNV:-11T,-9G,-7G,-4C	1	0	0	0	0	0	0	0	0	0	0	0
SNV:1C,2C,5C,6T	1	0	0	0	0	0	0	0	0	0	0	0
SNV:-17T,-2T	1	0	0	0	0	0	0	0	0	0	0	0
SNV:-12C,2T,6A	1	0	0	0	0	0	0	0	0	0	0	0
SNV:-12C,-7C,6C	1	0	0	0	0	0	0	0	0	0	0	0
SNV:-4G,-2A	1	0	0	0	0	0	0	0	0	0	0	0
SNV:-14T,-12C,6A	1	0	0	0	0	0	0	0	0	0	0	0
SNV:-12C,-1T,2T,3G,4G	1	0	0	0	0	0	0	0	0	0	0	0
SNV:-8G,3G,6C	1	0	0	0	0	0	0	0	0	0	0	0
SNV:-10A,-6C,-3G	1	0	0	0	0	0	0	0	0	0	0	0
SNV:2A,3G,6C	1	0	0	0	0	0	0	0	0	0	0	0
SNV:-1C,5T	1	0	0	0	0	0	0	0	0	0	0	0
SNV:-10A,-6C,-2T,3G	1	0	0	0	0	0	0	0	0	0	0	0
SNV:-12T,-3G,3G	1	0	0	0	0	0	0	0	0	0	0	0
SNV:-15G,-3C,-2A	1	0	0	0	0	0	0	0	0	0	0	0
SNV:-9G,-7A,3T	1	0	0	0	0	0	0	0	0	0	0	0
SNV:-15A,-12T	1	0	0	0	0	0	0	0	0	0	0	0
SNV:-1C,6C	1	0	0	0	0	0	0	0	0	0	0	0
SNV:-10C,3C	1	0	0	0	0	0	0	0	0	0	0	0
SNV:-10G,-5A,-3G	1	0	0	0	0	0	0	0	0	0	0	0
SNV:-11T,-6A	1	0	0	0	0	0	0	0	0	0	0	0
SNV:-7A,1C	1	0	0	0	0	0	0	0	0	0	0	0
SNV:-12G,-4G	1	0	0	0	0	0	0	0	0	0	0	0
SNV:-7G,4G	1	0	0	0	0	0	0	0	0	0	0	0
SNV:-17C,1C	1	0	0	0	0	0	0	0	0	0	0	0
SNV:-12G,-1T	1	0	0	0	0	0	0	0	0	0	0	0
SNV:-15C,-9A,6C	1	0	0	0	0	0	0	0	0	0	0	0
SNV:-15G,-9G	1	0	0	0	0	0	0	0	0	0	0	0
SNV:-12G,4G	1	0	0	0	0	0	0	0	0	0	0	0
SNV:1T,2C,3T,4G	1	0	0	0	0	0	0	0	0	0	0	0
SNV:-11T,-6C	1	0	0	0	0	0	0	0	0	0	0	0
SNV:-6C,3G,5T,6T	1	0	0	0	0	0	0	0	0	0	0	0
SNV:-17G,1G,2C,5T,6C	1	0	0	0	0	0	0	0	0	0	0	0
SNV:1C,5C	1	0	0	0	0	0	0	0	0	0	0	0
SNV:-16A,-15C,-13G,-6A,4A	1	0	0	0	0	0	0	0	0	0	0	0
SNV:-11A,2T	1	0	0	0	0	0	0	0	0	0	0	0
SNV:-15A,-1G	1	0	0	0	0	0	0	0	0	0	0	0
SNV:-9T,1G	1	0	0	0	0	0	0	0	0	0	0	0
SNV:-17C,-13A	1	0	0	0	0	0	0	0	0	0	0	0
SNV:-8G,-3C	1	0	0	0	0	0	0	0	0	0	0	0
SNV:-3C,4G	1	0	0	0	0	0	0	0	0	0	0	0
SNV:-15A,-10C	1	0	0	0	0	0	0	0	0	0	0	0
SNV:-16A,-3T	1	0	0	0	0	0	0	0	0	0	0	0
SNV:-2T,2C,4A	1	0	0	0	0	0	0	0	0	0	0	0
SNV:-15A,-3T,-1G	1	0	0	0	0	0	0	0	0	0	0	0
SNV:-11C,-3G,6A	1	0	0	0	0	0	0	0	0	0	0	0
SNV:-12T,-3G,6A	1	0	0	0	0	0	0	0	0	0	0	0
SNV:2C,3C	1	0	0	0	0	0	0	0	0	0	0	0
SNV:-9A,-2T,2T,5T	1	0	0	0	0	0	0	0	0	0	0	0
SNV:-11A,-8A,-6A,3T	1	0	0	0	0	0	0	0	0	0	0	0
SNV:-7C,-1C,3T,4C,6T	1	0	0	0	0	0	0	0	0	0	0	0
SNV:-1T,1C,2T,3T,5T	1	0	0	0	0	0	0	0	0	0	0	0
SNV:-16A,-13A,-9A,-8A	1	0	0	0	0	0	0	0	0	0	0	0
SNV:-12G,-3T,4A	1	0	0	0	0	0	0	0	0	0	0	0
SNV:-8G,3C	1	0	0	0	0	0	0	0	0	0	0	0
SNV:1G,3C,4G	1	0	0	0	0	0	0	0	0	0	0	0
SNV:-7C,-1C,1C,5T,6T	1	0	0	0	0	0	0	0	0	0	0	0
SNV:-5A,-1C	1	0	0	0	0	0	0	0	0	0	0	0
SNV:-12C,-11A,-8C	1	0	0	0	0	0	0	0	0	0	0	0
SNV:-14A,-8C	1	0	0	0	0	0	0	0	0	0	0	0
SNV:-11A,1C	1	0	0	0	0	0	0	0	0	0	0	0
SNV:-15A,-12T,-5A	1	0	0	0	0	0	0	0	0	0	0	0
SNV:-17C,-16A,-11T,-9A,-8G	1	0	0	0	0	0	0	0	0	0	0	0
SNV:-9T,-8G,-6A	1	0	0	0	0	0	0	0	0	0	0	0
SNV:-17G,-14T	1	0	0	0	0	0	0	0	0	0	0	0
SNV:-7G,-2T,-1T	1	0	0	0	0	0	0	0	0	0	0	0
SNV:-8A,-4C,4G	0	1	0	0	0	0	0	0	0	0	0	0
SNV:-17C,-14A,-5A,1C	0	1	0	0	0	0	0	0	0	0	0	0
SNV:2T,5T,6T	0	1	0	0	0	0	0	0	0	0	0	0
SNV:-17C,2T,3T,5A,6T	0	1	0	0	0	0	0	0	0	0	0	0
SNV:-17C,-16T,-15C,2T,3T,5T,6T	0	1	0	0	0	0	0	0	0	0	0	0
SNV:-17C,-10C	0	1	0	0	0	0	0	0	0	0	0	0
SNV:-3G,-1C,3C	0	1	0	0	0	0	0	0	0	0	0	0
SNV:-15C,-2T	0	1	0	0	0	0	0	0	0	0	0	0
SNV:-11A,-3C	0	1	0	0	0	0	0	0	0	0	0	0
SNV:-15A,-14G,-10G,-7C,-1C	0	1	0	0	0	0	0	0	0	0	0	0
SNV:-6C,-5A,-3C,1T,3T,4C	0	1	0	0	0	0	0	0	0	0	0	0
SNV:-12G,-10C,-1C,1G,5T,6T	0	1	0	0	0	0	0	0	0	0	0	0
SNV:-13A,3C	0	1	0	0	0	0	0	0	0	0	0	0
SNV:-12C,-8C,2T,6T	0	1	0	0	0	0	0	0	0	0	0	0
SNV:-8A,2A,5T	0	1	0	0	0	0	0	0	0	0	0	0
SNV:-9T,4G	0	1	0	0	0	0	0	0	0	0	0	0
SNV:-17G,-8G,-6C,-3G,-1C,3C,6T	0	1	0	0	0	0	0	0	0	0	0	0
SNV:-7G,-1T	0	1	0	0	0	0	0	0	0	0	0	0
SNV:-12C,-8C,-2A,-1T	0	1	0	0	0	0	0	0	0	0	0	0
SNV:-15C,-14T,-11C,-10G,-9T,-3T	0	1	0	0	0	0	0	0	0	0	0	0
SNV:-15A,-8C,-6A	0	1	0	0	0	0	0	0	0	0	0	0
SNV:-14T,-9A,-4G,5T,6C	0	1	0	0	0	0	0	0	0	0	0	0
SNV:-13A,-12T,-1G	0	1	0	0	0	0	0	0	0	0	0	0
SNV:-15C,-6C,-2C,-1T	0	1	0	0	0	0	0	0	0	0	0	0
SNV:-15C,-11C,-8G,-7G	0	1	0	0	0	0	0	0	0	0	0	0
SNV:-7C,-3T,4A	0	1	0	0	0	0	0	0	0	0	0	0
SNV:-15A,-8A,3T,4G	0	1	0	0	0	0	0	0	0	0	0	0
SNV:-9A,-8G,-4C,4G	0	1	0	0	0	0	0	0	0	0	0	0
SNV:-15A,-10G,-4G	0	1	0	0	0	0	0	0	0	0	0	0
SNV:-16G,-11C,-3G,6T	0	1	0	0	0	0	0	0	0	0	0	0
SNV:-15C,2T	0	1	0	0	0	0	0	0	0	0	0	0
SNV:-4G,4G	0	1	0	0	0	0	0	0	0	0	0	0
SNV:-17C,-6C	0	1	0	0	0	0	0	0	0	0	0	0
SNV:-8C,3G	0	1	0	0	0	0	0	0	0	0	0	0
SNV:-6A,2T	0	1	0	0	0	0	0	0	0	0	0	0
SNV:-3T,-1C	0	1	0	0	0	0	0	0	0	0	0	0
SNV:-3G,-1G	0	1	0	0	0	0	0	0	0	0	0	0
SNV:-15G,-12C,-11T	0	1	0	0	0	0	0	0	0	0	0	0
SNV:-10G,-1C,1C,5T,6T	0	1	0	0	0	0	0	0	0	0	0	0
SNV:-12C,-3T,1G,2C	0	1	0	0	0	0	0	0	0	0	0	0
SNV:-15A,1G,6C	0	1	0	0	0	0	0	0	0	0	0	0
SNV:-10G,4G,6T	0	1	0	0	0	0	0	0	0	0	0	0
SNV:-14G,-10G	0	1	0	0	0	0	0	0	0	0	0	0
SNV:-12C,-10G,-8C,-4C,3G	0	1	0	0	0	0	0	0	0	0	0	0
SNV:-15C,-8C,5T	0	1	0	0	0	0	0	0	0	0	0	0
SNV:-15C,-1G,3G	0	1	0	0	0	0	0	0	0	0	0	0
SNV:-13T,-10A,-3G	0	1	0	0	0	0	0	0	0	0	0	0
SNV:-12G,-7G,-3G	0	1	0	0	0	0	0	0	0	0	0	0
SNV:-2A,2C,5T	0	1	0	0	0	0	0	0	0	0	0	0
SNV:-3G,3T	0	1	0	0	0	0	0	0	0	0	0	0
SNV:-9A,-2C,-1T,1G	0	1	0	0	0	0	0	0	0	0	0	0
SNV:1G,3C,6C	0	1	0	0	0	0	0	0	0	0	0	0
SNV:-12C,3T	0	1	0	0	0	0	0	0	0	0	0	0
SNV:-11C,-4C,3G	0	1	0	0	0	0	0	0	0	0	0	0
SNV:-12C,1G,3C,6C	0	1	0	0	0	0	0	0	0	0	0	0
SNV:-10C,-8G,-7A,4C	0	1	0	0	0	0	0	0	0	0	0	0
SNV:-17G,-8G	0	1	0	0	0	0	0	0	0	0	0	0
SNV:-10A,6C	0	1	0	0	0	0	0	0	0	0	0	0
SNV:-13A,-10C,3T,4G	0	1	0	0	0	0	0	0	0	0	0	0
SNV:-3G,6T	0	1	0	0	0	0	0	0	0	0	0	0
SNV:-8C,2A	0	1	0	0	0	0	0	0	0	0	0	0
SNV:-17C,-15C,-14A,-10A,-8G,-6G,4G	0	1	0	0	0	0	0	0	0	0	0	0
SNV:-10C,-1G,1T	0	1	0	0	0	0	0	0	0	0	0	0
SNV:-4C,-2A,3G,4G	0	1	0	0	0	0	0	0	0	0	0	0
SNV:1G,3C	0	1	0	0	0	0	0	0	0	0	0	0
SNV:-12T,-11C,-3G,-2T,4C,6A	0	1	0	0	0	0	0	0	0	0	0	0
SNV:-7C,-4A,-1T	0	1	0	0	0	0	0	0	0	0	0	0
SNV:-6G,1T	0	1	0	0	0	0	0	0	0	0	0	0
SNV:-1G,3C	0	1	0	0	0	0	0	0	0	0	0	0
SNV:-3T,2T,5T	0	1	0	0	0	0	0	0	0	0	0	0
SNV:1C,3G,5C	0	1	0	0	0	0	0	0	0	0	0	0
SNV:-11A,-8G,-6C,-4A,-1G	0	1	0	0	0	0	0	0	0	0	0	0
SNV:-14T,-1T,6C	0	1	0	0	0	0	0	0	0	0	0	0
SNV:-4C,-2T,-1T	0	1	0	0	0	0	0	0	0	0	0	0
SNV:-15C,-10G	0	1	0	0	0	0	0	0	0	0	0	0
SNV:-15G,-10A	0	1	0	0	0	0	0	0	0	0	0	0
SNV:-15A,-8C,4A	0	1	0	0	0	0	0	0	0	0	0	0
SNV:-14T,2C,5A	0	1	0	0	0	0	0	0	0	0	0	0
SNV:-10G,-3G,4C	0	1	0	0	0	0	0	0	0	0	0	0
SNV:-12C,-11A,-10G,-9A,-5T,-1G	0	1	0	0	0	0	0	0	0	0	0	0
SNV:-4G,-1T,3C,6C	0	1	0	0	0	0	0	0	0	0	0	0
SNV:-15A,-14A,-8C	0	1	0	0	0	0	0	0	0	0	0	0
SNV:-10A,-2T,6C	0	1	0	0	0	0	0	0	0	0	0	0
SNV:-16G,-15C,-14A,-9A,-7G,3C,6C	0	1	0	0	0	0	0	0	0	0	0	0
SNV:-3T,-1G,1G	0	1	0	0	0	0	0	0	0	0	0	0
SNV:-17C,3C,4C	0	1	0	0	0	0	0	0	0	0	0	0
SNV:-1T,1T,2T,6A	0	1	0	0	0	0	0	0	0	0	0	0
SNV:1T,3G,6A	0	1	0	0	0	0	0	0	0	0	0	0
SNV:-10A,-8G,-2T,1C,2C,3G,6T	0	1	0	0	0	0	0	0	0	0	0	0
SNV:-2T,5C	0	1	0	0	0	0	0	0	0	0	0	0
SNV:-17G,-1T,2T,4G	0	1	0	0	0	0	0	0	0	0	0	0
SNV:-17C,-3T	0	1	0	0	0	0	0	0	0	0	0	0
SNV:-16G,-15A,-14A,-11T,-10A,-8G,-7A,-4A	0	1	0	0	0	0	0	0	0	0	0	0
SNV:-12T,1G	0	1	0	0	0	0	0	0	0	0	0	0
SNV:-13T,-8A,-6C	0	1	0	0	0	0	0	0	0	0	0	0
SNV:-1G,1G,3G,4G	0	1	0	0	0	0	0	0	0	0	0	0
SNV:3T,6C	0	1	0	0	0	0	0	0	0	0	0	0
SNV:-11T,-7A	0	1	0	0	0	0	0	0	0	0	0	0
SNV:2C,4A,6A	0	1	0	0	0	0	0	0	0	0	0	0
SNV:-15A,-10G,-4C,4G	0	1	0	0	0	0	0	0	0	0	0	0
SNV:-12T,-11C,-10C,4A	0	1	0	0	0	0	0	0	0	0	0	0
SNV:-17C,-11T,-8G	0	1	0	0	0	0	0	0	0	0	0	0
SNV:-2A,-1G,1T	0	1	0	0	0	0	0	0	0	0	0	0
SNV:-17T,-16T	0	1	0	0	0	0	0	0	0	0	0	0
SNV:-15C,-8A,3G,4A	0	1	0	0	0	0	0	0	0	0	0	0
SNV:-10G,1C,3G	0	1	0	0	0	0	0	0	0	0	0	0
SNV:-15C,-10G,4G	0	1	0	0	0	0	0	0	0	0	0	0
SNV:-17C,-11T,-10A	0	1	0	0	0	0	0	0	0	0	0	0
SNV:-9T,-1C,1G	0	1	0	0	0	0	0	0	0	0	0	0
SNV:-9G,4A	0	1	0	0	0	0	0	0	0	0	0	0
SNV:-12T,-11C,1T	0	1	0	0	0	0	0	0	0	0	0	0
SNV:-8A,-1C,2A	0	1	0	0	0	0	0	0	0	0	0	0
SNV:-14T,-12C,-8G,-5T,-4A,-1C	0	1	0	0	0	0	0	0	0	0	0	0
SNV:-8G,-7G,-4G,-3G,1G	0	1	0	0	0	0	0	0	0	0	0	0
SNV:-15C,1T,3G,4G	0	1	0	0	0	0	0	0	0	0	0	0
SNV:-8C,-6C	0	1	0	0	0	0	0	0	0	0	0	0
SNV:-12C,-8C,1T	0	1	0	0	0	0	0	0	0	0	0	0
SNV:2C,4C	0	1	0	0	0	0	0	0	0	0	0	0
SNV:-1G,1G,3T	0	1	0	0	0	0	0	0	0	0	0	0
SNV:-16G,-15G,-4G,4G	0	1	0	0	0	0	0	0	0	0	0	0
SNV:-12C,-11T,-1T,1G,2C	0	1	0	0	0	0	0	0	0	0	0	0
SNV:-10G,-3C	0	1	0	0	0	0	0	0	0	0	0	0
SNV:-17G,-2A	0	1	0	0	0	0	0	0	0	0	0	0
SNV:-1G,1C,2A,4C	0	1	0	0	0	0	0	0	0	0	0	0
SNV:-6C,3G	0	1	0	0	0	0	0	0	0	0	0	0
SNV:-10G,3G	0	1	0	0	0	0	0	0	0	0	0	0
SNV:-16A,-5G,1C	0	1	0	0	0	0	0	0	0	0	0	0
SNV:-4C,-3C	0	1	0	0	0	0	0	0	0	0	0	0
SNV:-11A,-1G	0	1	0	0	0	0	0	0	0	0	0	0
SNV:-11A,-2C,-1T	0	1	0	0	0	0	0	0	0	0	0	0
SNV:-15C,1C,2T	0	1	0	0	0	0	0	0	0	0	0	0
SNV:1G,4G,6A	0	1	0	0	0	0	0	0	0	0	0	0
SNV:-15A,-5T,1T	0	1	0	0	0	0	0	0	0	0	0	0
SNV:-12T,-11T	0	1	0	0	0	0	0	0	0	0	0	0
SNV:-10G,-4C,-1C	0	1	0	0	0	0	0	0	0	0	0	0
SNV:1G,6A	0	1	0	0	0	0	0	0	0	0	0	0
SNV:-7C,5A	0	1	0	0	0	0	0	0	0	0	0	0
SNV:-13A,-8A	0	1	0	0	0	0	0	0	0	0	0	0
SNV:-6C,-5A	0	1	0	0	0	0	0	0	0	0	0	0
SNV:-17C,-15C,-10C,-6C,1G,2A,3G	0	1	0	0	0	0	0	0	0	0	0	0
SNV:-15C,-9A,-8C	0	1	0	0	0	0	0	0	0	0	0	0
SNV:-17G,-13T,2C,3T	0	1	0	0	0	0	0	0	0	0	0	0
SNV:-17C,-12C,-3C	0	1	0	0	0	0	0	0	0	0	0	0
SNV:-11A,-8C,-4C,-1G	0	1	0	0	0	0	0	0	0	0	0	0
SNV:-11C,1T	0	1	0	0	0	0	0	0	0	0	0	0
SNV:-6A,-5G,-3T,1G	0	1	0	0	0	0	0	0	0	0	0	0
SNV:-8C,-2T	0	1	0	0	0	0	0	0	0	0	0	0
SNV:-12C,-1C,1T	0	1	0	0	0	0	0	0	0	0	0	0
SNV:-15A,-9A,-8G,-7G,-5G,-2T,6T	0	1	0	0	0	0	0	0	0	0	0	0
SNV:-8G,-2C,-1T,6T	0	1	0	0	0	0	0	0	0	0	0	0
SNV:-17C,-8C	0	1	0	0	0	0	0	0	0	0	0	0
SNV:-6C,2C,6T	0	1	0	0	0	0	0	0	0	0	0	0
SNV:-8G,-6C	0	1	0	0	0	0	0	0	0	0	0	0
SNV:-8C,-6G,-4A	0	1	0	0	0	0	0	0	0	0	0	0
SNV:-14T,2T,4G	0	1	0	0	0	0	0	0	0	0	0	0
SNV:-17G,-15C,-3C	0	1	0	0	0	0	0	0	0	0	0	0
SNV:3T,5C	0	1	0	0	0	0	0	0	0	0	0	0
SNV:-16G,-12T,-11A,-3G	0	1	0	0	0	0	0	0	0	0	0	0
SNV:-8G,-7C,-3C	0	1	0	0	0	0	0	0	0	0	0	0
SNV:-6C,1G,4G	0	1	0	0	0	0	0	0	0	0	0	0
SNV:-15C,-11A,-8A,-7C,-3C,-2T,2C,3C	0	1	0	0	0	0	0	0	0	0	0	0
SNV:-11T,4C	0	1	0	0	0	0	0	0	0	0	0	0
SNV:-17C,-11C,4C	0	1	0	0	0	0	0	0	0	0	0	0
SNV:1C,2C,5C	0	1	0	0	0	0	0	0	0	0	0	0
SNV:2A,3G,4A	0	1	0	0	0	0	0	0	0	0	0	0
SNV:-4C,-1T	0	1	0	0	0	0	0	0	0	0	0	0
SNV:-11C,-7A,-3C,-1C	0	1	0	0	0	0	0	0	0	0	0	0
SNV:-17C,-16G,-10G,-4C,4C	0	1	0	0	0	0	0	0	0	0	0	0
SNV:-7A,-6A,-4C	0	1	0	0	0	0	0	0	0	0	0	0
SNV:-15A,-11A,-7G	0	1	0	0	0	0	0	0	0	0	0	0
SNV:-12C,-3C	0	1	0	0	0	0	0	0	0	0	0	0
SNV:-15A,-9A,1G,2T	0	1	0	0	0	0	0	0	0	0	0	0
SNV:1G,2T,3G,4A	0	1	0	0	0	0	0	0	0	0	0	0
SNV:-15A,-12C,1G,4G	0	1	0	0	0	0	0	0	0	0	0	0
SNV:-10G,-8C,1C,2A	0	1	0	0	0	0	0	0	0	0	0	0
SNV:-7C,4G	0	1	0	0	0	0	0	0	0	0	0	0
SNV:-13G,-9G,-2T	0	1	0	0	0	0	0	0	0	0	0	0
SNV:-4C,1C	0	1	0	0	0	0	0	0	0	0	0	0
SNV:-12C,-8C,3G	0	1	0	0	0	0	0	0	0	0	0	0
SNV:-7A,-6G,-1G	0	1	0	0	0	0	0	0	0	0	0	0
SNV:-13T,-6A,4G	0	1	0	0	0	0	0	0	0	0	0	0
SNV:-17G,-15A,4G,6A	0	1	0	0	0	0	0	0	0	0	0	0
SNV:-4G,-1C,5T,6T	0	1	0	0	0	0	0	0	0	0	0	0
SNV:-8A,-2A,-1C,1T	0	1	0	0	0	0	0	0	0	0	0	0
SNV:-15A,-3G,-2T,1T	0	1	0	0	0	0	0	0	0	0	0	0
SNV:-6C,-4G,1T,3T	0	1	0	0	0	0	0	0	0	0	0	0
SNV:-14T,-12C,-2T,1G,2C,3C,5C	0	1	0	0	0	0	0	0	0	0	0	0
SNV:-9A,-2A,-1T,1G	0	1	0	0	0	0	0	0	0	0	0	0
SNV:-15A,-8C,1C	0	1	0	0	0	0	0	0	0	0	0	0
SNV:-14A,-10G	0	1	0	0	0	0	0	0	0	0	0	0
SNV:-14G,-9T,-7C,-6A,2C,3T,4A	0	1	0	0	0	0	0	0	0	0	0	0
SNV:-14T,-4A,3G	0	1	0	0	0	0	0	0	0	0	0	0
SNV:-17C,3G	0	1	0	0	0	0	0	0	0	0	0	0
SNV:-15C,-9A	0	1	0	0	0	0	0	0	0	0	0	0
SNV:-15A,-11C	0	1	0	0	0	0	0	0	0	0	0	0
SNV:-8C,1G	0	1	0	0	0	0	0	0	0	0	0	0
SNV:-15C,-3C,1C,3T,4C	0	1	0	0	0	0	0	0	0	0	0	0
SNV:-2C,-1T,3C	0	1	0	0	0	0	0	0	0	0	0	0
SNV:-2A,5T	0	1	0	0	0	0	0	0	0	0	0	0
SNV:-16T,-4A	0	1	0	0	0	0	0	0	0	0	0	0
SNV:-8C,6A	0	1	0	0	0	0	0	0	0	0	0	0
SNV:-6C,3T,4G	0	1	0	0	0	0	0	0	0	0	0	0
SNV:-10G,-5T	0	1	0	0	0	0	0	0	0	0	0	0
SNV:-12G,-1G,2C	0	1	0	0	0	0	0	0	0	0	0	0
SNV:-8A,-6G	0	1	0	0	0	0	0	0	0	0	0	0
SNV:-1T,1G,3C	0	1	0	0	0	0	0	0	0	0	0	0
SNV:-3T,-2T,-1T,1T,2T,3T	0	1	0	0	0	0	0	0	0	0	0	0
SNV:-7A,-3T	0	1	0	0	0	0	0	0	0	0	0	0
SNV:-1T,1G,4C	0	1	0	0	0	0	0	0	0	0	0	0
SNV:-7C,4A	0	1	0	0	0	0	0	0	0	0	0	0
SNV:-15C,-6C,-5T,1G	0	1	0	0	0	0	0	0	0	0	0	0
SNV:-1G,1G,4G	0	1	0	0	0	0	0	0	0	0	0	0
SNV:-17C,-12C,-11A,-4C,3T	0	1	0	0	0	0	0	0	0	0	0	0
SNV:-13T,-12G,-8A,-3T	0	1	0	0	0	0	0	0	0	0	0	0
SNV:-15C,2A,5T	0	1	0	0	0	0	0	0	0	0	0	0
SNV:-15A,-13A	0	1	0	0	0	0	0	0	0	0	0	0
SNV:-12C,-11A,2A	0	1	0	0	0	0	0	0	0	0	0	0
SNV:-5A,-4G,1C	0	1	0	0	0	0	0	0	0	0	0	0
SNV:-15A,1G,2C,4G,6C	0	1	0	0	0	0	0	0	0	0	0	0
SNV:-3T,-1T,1G,6C	0	1	0	0	0	0	0	0	0	0	0	0
SNV:-13T,-12T,-2T,3C	0	1	0	0	0	0	0	0	0	0	0	0
SNV:-15C,3G,5T	0	1	0	0	0	0	0	0	0	0	0	0
SNV:-15A,-2C	0	1	0	0	0	0	0	0	0	0	0	0
SNV:-8A,-2T	0	1	0	0	0	0	0	0	0	0	0	0
SNV:-12T,-10G,-4A,4G	0	1	0	0	0	0	0	0	0	0	0	0
SNV:2C,4A	0	1	0	0	0	0	0	0	0	0	0	0
SNV:-2A,-1T,5T,6C	0	1	0	0	0	0	0	0	0	0	0	0
SNV:1G,6C	0	1	0	0	0	0	0	0	0	0	0	0
SNV:-4G,-3T	0	1	0	0	0	0	0	0	0	0	0	0
SNV:-10A,-8C,-1G	0	1	0	0	0	0	0	0	0	0	0	0
SNV:-16A,-15A,-8C,3T	0	1	0	0	0	0	0	0	0	0	0	0
SNV:-3T,-1G	0	1	0	0	0	0	0	0	0	0	0	0
SNV:-11C,-3G,1T	0	1	0	0	0	0	0	0	0	0	0	0
SNV:-5G,-3T,-1G,2A,3G	0	1	0	0	0	0	0	0	0	0	0	0
SNV:-3C,1G,3G	0	1	0	0	0	0	0	0	0	0	0	0
SNV:-10G,-8A,-7C,5T,6C	0	1	0	0	0	0	0	0	0	0	0	0
SNV:-16A,6A	0	1	0	0	0	0	0	0	0	0	0	0
SNV:-12C,-10G,-8A	0	1	0	0	0	0	0	0	0	0	0	0
SNV:-15A,-9T,-2T,1T	0	1	0	0	0	0	0	0	0	0	0	0
SNV:3G,4A,5C	0	1	0	0	0	0	0	0	0	0	0	0
SNV:2A,5C	0	1	0	0	0	0	0	0	0	0	0	0
SNV:-3C,3G,6T	0	1	0	0	0	0	0	0	0	0	0	0
SNV:-5T,-3T,-2T,-1T,1T,2T,3T	0	1	0	0	0	0	0	0	0	0	0	0
SNV:-15C,-13A,3G	0	1	0	0	0	0	0	0	0	0	0	0
SNV:-15A,-4C,1T	0	1	0	0	0	0	0	0	0	0	0	0
SNV:-10C,-3T,1T	0	1	0	0	0	0	0	0	0	0	0	0
SNV:-12C,-11A	0	1	0	0	0	0	0	0	0	0	0	0
SNV:-17G,-10G	0	1	0	0	0	0	0	0	0	0	0	0
SNV:-13A,-10A,-6G,1G	0	1	0	0	0	0	0	0	0	0	0	0
SNV:-17T,-15A,2T	0	1	0	0	0	0	0	0	0	0	0	0
SNV:-11T,-2T,-1T,1T,2T,3T	0	1	0	0	0	0	0	0	0	0	0	0
SNV:-10A,6T	0	1	0	0	0	0	0	0	0	0	0	0
SNV:-2A,1G,2C,6A	0	1	0	0	0	0	0	0	0	0	0	0
SNV:-4G,3T	0	1	0	0	0	0	0	0	0	0	0	0
SNV:-11T,1C,2C,6T	0	1	0	0	0	0	0	0	0	0	0	0
SNV:-14A,-9A,4A	0	1	0	0	0	0	0	0	0	0	0	0
SNV:-15C,-11A,-10G,-8C	0	1	0	0	0	0	0	0	0	0	0	0
SNV:-13T,-10G	0	1	0	0	0	0	0	0	0	0	0	0
SNV:-17C,-4A,-1T	0	1	0	0	0	0	0	0	0	0	0	0
SNV:-17G,-1T,6A	0	1	0	0	0	0	0	0	0	0	0	0
SNV:-3G,-1T	0	1	0	0	0	0	0	0	0	0	0	0
SNV:-15C,-12T,-1T	0	1	0	0	0	0	0	0	0	0	0	0
SNV:-12C,-2A,2A	0	1	0	0	0	0	0	0	0	0	0	0
SNV:-12C,-9T	0	1	0	0	0	0	0	0	0	0	0	0
SNV:-15A,-14A,-8A,3T	0	1	0	0	0	0	0	0	0	0	0	0
SNV:-12T,-7C,2T	0	1	0	0	0	0	0	0	0	0	0	0
SNV:-11A,2A,3T	0	0	1	0	0	0	0	0	0	0	0	0
SNV:-16T,2T,3T,5A,6T	0	0	1	0	0	0	0	0	0	0	0	0
SNV:-17C,5T,6T	0	0	1	0	0	0	0	0	0	0	0	0
SNV:-16T,-4C,2T,3T,5T,6T	0	0	1	0	0	0	0	0	0	0	0	0
SNV:-17C,-16T,2T,5A,6T	0	0	1	0	0	0	0	0	0	0	0	0
SNV:3T,5A,6T	0	0	1	0	0	0	0	0	0	0	0	0
SNV:-4G,-2C,4A	0	0	1	0	0	0	0	0	0	0	0	0
SNV:-10A,3G,6C	0	0	1	0	0	0	0	0	0	0	0	0
SNV:-1G,1C,3C,6T	0	0	1	0	0	0	0	0	0	0	0	0
SNV:4A,6T	0	0	1	0	0	0	0	0	0	0	0	0
SNV:-2T,1C,6T	0	0	1	0	0	0	0	0	0	0	0	0
SNV:-14A,-12T	0	0	1	0	0	0	0	0	0	0	0	0
SNV:-12C,4A	0	0	1	0	0	0	0	0	0	0	0	0
SNV:-4C,-1C	0	0	1	0	0	0	0	0	0	0	0	0
SNV:-7C,-2C	0	0	1	0	0	0	0	0	0	0	0	0
SNV:-7C,3T,5T,6T	0	0	1	0	0	0	0	0	0	0	0	0
SNV:-10C,-9T,-7C,-1G	0	0	1	0	0	0	0	0	0	0	0	0
SNV:-11T,-4C	0	0	1	0	0	0	0	0	0	0	0	0
SNV:-12C,-11A,-5G,-4C,3T	0	0	1	0	0	0	0	0	0	0	0	0
SNV:-15A,-10G	0	0	1	0	0	0	0	0	0	0	0	0
SNV:-7C,-2C,-1T,6C	0	0	1	0	0	0	0	0	0	0	0	0
SNV:-12T,-10A,6T	0	0	1	0	0	0	0	0	0	0	0	0
SNV:-8C,4G	0	0	1	0	0	0	0	0	0	0	0	0
SNV:-11A,-7G,-1C	0	0	1	0	0	0	0	0	0	0	0	0
SNV:-11A,-8A	0	0	1	0	0	0	0	0	0	0	0	0
SNV:-15C,-7A	0	0	1	0	0	0	0	0	0	0	0	0
SNV:-1T,1T	0	0	1	0	0	0	0	0	0	0	0	0
SNV:-1C,1T	0	0	1	0	0	0	0	0	0	0	0	0
SNV:-1C,2T,4A	0	0	1	0	0	0	0	0	0	0	0	0
SNV:-13T,2T,5T,6A	0	0	1	0	0	0	0	0	0	0	0	0
SNV:2C,6C	0	0	1	0	0	0	0	0	0	0	0	0
SNV:-15C,-2C,-1T,4A	0	0	1	0	0	0	0	0	0	0	0	0
SNV:-9T,5T	0	0	1	0	0	0	0	0	0	0	0	0
SNV:1T,2C,4A	0	0	1	0	0	0	0	0	0	0	0	0
SNV:1T,4A	0	0	1	0	0	0	0	0	0	0	0	0
SNV:1C,2T,3T,6C	0	0	1	0	0	0	0	0	0	0	0	0
SNV:-1G,1C,4C,5C	0	0	1	0	0	0	0	0	0	0	0	0
SNV:-8A,1T	0	0	1	0	0	0	0	0	0	0	0	0
SNV:-9T,-6C,-4A	0	0	1	0	0	0	0	0	0	0	0	0
SNV:2A,4C,5C	0	0	1	0	0	0	0	0	0	0	0	0
SNV:-17T,-12T	0	0	1	0	0	0	0	0	0	0	0	0
SNV:-15A,4C	0	0	1	0	0	0	0	0	0	0	0	0
SNV:-11C,2T,3C	0	0	1	0	0	0	0	0	0	0	0	0
SNV:-17T,-11C,-8C,-7A	0	0	1	0	0	0	0	0	0	0	0	0
SNV:-6G,-3C	0	0	1	0	0	0	0	0	0	0	0	0
SNV:-15C,-11A	0	0	1	0	0	0	0	0	0	0	0	0
SNV:-9A,-2T,6A	0	0	1	0	0	0	0	0	0	0	0	0
SNV:-2T,3T	0	0	1	0	0	0	0	0	0	0	0	0
SNV:-15C,-8C,-6G,-3C,3C,4C	0	0	1	0	0	0	0	0	0	0	0	0
SNV:-9A,-2T,1G,4G,6C	0	0	1	0	0	0	0	0	0	0	0	0
SNV:-3T,1T	0	0	1	0	0	0	0	0	0	0	0	0
SNV:-17T,-11A	0	0	1	0	0	0	0	0	0	0	0	0
SNV:-2C,-1T,6C	0	0	1	0	0	0	0	0	0	0	0	0
SNV:-11A,-6C,-3G	0	0	1	0	0	0	0	0	0	0	0	0
SNV:3G,4C,5C,6C	0	0	1	0	0	0	0	0	0	0	0	0
SNV:-10A,-7C,-4A	0	0	1	0	0	0	0	0	0	0	0	0
SNV:-16A,-15A,2T	0	0	1	0	0	0	0	0	0	0	0	0
SNV:-4C,3G,6C	0	0	1	0	0	0	0	0	0	0	0	0
SNV:-16T,6T	0	0	1	0	0	0	0	0	0	0	0	0
SNV:-16T,-2C	0	0	1	0	0	0	0	0	0	0	0	0
SNV:-3G,6C	0	0	1	0	0	0	0	0	0	0	0	0
SNV:-17C,-15A,-6A,3T	0	0	1	0	0	0	0	0	0	0	0	0
SNV:-1C,1G	0	0	1	0	0	0	0	0	0	0	0	0
SNV:-12C,-8A,4G,5T,6C	0	0	1	0	0	0	0	0	0	0	0	0
SNV:-1T,3T,5T	0	0	1	0	0	0	0	0	0	0	0	0
SNV:-6A,-4C	0	0	1	0	0	0	0	0	0	0	0	0
SNV:-9T,-8G,-7G,-6A,-4C	0	0	1	0	0	0	0	0	0	0	0	0
SNV:-17C,-15C,1G,3T	0	0	1	0	0	0	0	0	0	0	0	0
SNV:-12C,-2T,1C,2C,3G,4G	0	0	1	0	0	0	0	0	0	0	0	0
SNV:-2T,-1G,2C	0	0	1	0	0	0	0	0	0	0	0	0
SNV:-10C,-6G,3C	0	0	1	0	0	0	0	0	0	0	0	0
SNV:4G,5A	0	0	1	0	0	0	0	0	0	0	0	0
SNV:1G,2T	0	0	1	0	0	0	0	0	0	0	0	0
SNV:-1T,2C,6C	0	0	1	0	0	0	0	0	0	0	0	0
SNV:-17C,1T,4C	0	0	1	0	0	0	0	0	0	0	0	0
SNV:-17G,-12T,-9A,-8G	0	0	1	0	0	0	0	0	0	0	0	0
SNV:-8G,-7C,-6A,-4C	0	0	1	0	0	0	0	0	0	0	0	0
SNV:-17T,-7G,-3T	0	0	1	0	0	0	0	0	0	0	0	0
SNV:-3G,1T,3T,5C,6T	0	0	1	0	0	0	0	0	0	0	0	0
SNV:-15C,-10G,-1T	0	0	1	0	0	0	0	0	0	0	0	0
SNV:-15C,-13A,-10C,2A	0	0	1	0	0	0	0	0	0	0	0	0
SNV:-5G,-2C,-1T	0	0	1	0	0	0	0	0	0	0	0	0
SNV:-14G,-10G,-7G,-6G,-3C,-2T,-1C,3T,4G	0	0	1	0	0	0	0	0	0	0	0	0
SNV:-16T,-15A	0	0	1	0	0	0	0	0	0	0	0	0
SNV:-3T,-1T,1G,4G	0	0	1	0	0	0	0	0	0	0	0	0
SNV:-4C,-3G,-1C	0	0	1	0	0	0	0	0	0	0	0	0
SNV:1C,2A,3G,4G	0	0	1	0	0	0	0	0	0	0	0	0
SNV:-13T,-12C,-9A,-2T,3C,5T	0	0	1	0	0	0	0	0	0	0	0	0
SNV:4G,5T,6C	0	0	1	0	0	0	0	0	0	0	0	0
SNV:-12C,-3C,4G	0	0	1	0	0	0	0	0	0	0	0	0
SNV:-7G,-5G,-3G,-1G	0	0	1	0	0	0	0	0	0	0	0	0
SNV:-17C,-9G	0	0	1	0	0	0	0	0	0	0	0	0
SNV:-15G,-14G,-9G,-8A,3C	0	0	1	0	0	0	0	0	0	0	0	0
SNV:-8C,-3G,-2C,6T	0	0	1	0	0	0	0	0	0	0	0	0
SNV:-15C,-7C	0	0	1	0	0	0	0	0	0	0	0	0
SNV:-6C,-5A,-4A	0	0	1	0	0	0	0	0	0	0	0	0
SNV:-4C,-1T,1G	0	0	1	0	0	0	0	0	0	0	0	0
SNV:-15C,-3G,-2A	0	0	1	0	0	0	0	0	0	0	0	0
SNV:-11T,-2C,-1T	0	0	1	0	0	0	0	0	0	0	0	0
SNV:-10A,-8C,-2C,-1T	0	0	1	0	0	0	0	0	0	0	0	0
SNV:-16G,1C,3T,6T	0	0	1	0	0	0	0	0	0	0	0	0
SNV:-15A,-7A	0	0	1	0	0	0	0	0	0	0	0	0
SNV:-16A,-14G,-10G,-7G,-6A,-4G	0	0	1	0	0	0	0	0	0	0	0	0
SNV:-4C,-1T,3C	0	0	1	0	0	0	0	0	0	0	0	0
SNV:1C,2T,4G	0	0	1	0	0	0	0	0	0	0	0	0
SNV:-3G,-1G,1C,3C	0	0	1	0	0	0	0	0	0	0	0	0
SNV:-8C,-6G,-2C,-1G	0	0	1	0	0	0	0	0	0	0	0	0
SNV:-6C,-1G,1C,6T	0	0	1	0	0	0	0	0	0	0	0	0
SNV:-2T,2C,5C	0	0	1	0	0	0	0	0	0	0	0	0
SNV:-15A,-10A,-8A	0	0	1	0	0	0	0	0	0	0	0	0
SNV:-7A,-6G	0	0	1	0	0	0	0	0	0	0	0	0
SNV:-16T,-10A,-1T	0	0	1	0	0	0	0	0	0	0	0	0
SNV:-7C,-2C,-1C	0	0	1	0	0	0	0	0	0	0	0	0
SNV:-7G,-3G	0	0	1	0	0	0	0	0	0	0	0	0
SNV:-17C,-1G,1T	0	0	1	0	0	0	0	0	0	0	0	0
SNV:2C,3G,6T	0	0	1	0	0	0	0	0	0	0	0	0
SNV:1C,2C,4G	0	0	1	0	0	0	0	0	0	0	0	0
SNV:-3G,4C	0	0	1	0	0	0	0	0	0	0	0	0
SNV:-9T,-4C,-2T	0	0	1	0	0	0	0	0	0	0	0	0
SNV:-12C,-7C,2A	0	0	1	0	0	0	0	0	0	0	0	0
SNV:-8C,-4C,-2C,-1T	0	0	1	0	0	0	0	0	0	0	0	0
SNV:-3G,-1G,4C,5A,6T	0	0	1	0	0	0	0	0	0	0	0	0
SNV:-2T,1T,6T	0	0	1	0	0	0	0	0	0	0	0	0
SNV:-13G,-11A,-7G,-3G,1T	0	0	1	0	0	0	0	0	0	0	0	0
SNV:-5G,-3C	0	0	1	0	0	0	0	0	0	0	0	0
SNV:-15C,-2A,2A	0	0	1	0	0	0	0	0	0	0	0	0
SNV:-4C,-3G,5A,6T	0	0	1	0	0	0	0	0	0	0	0	0
SNV:-15C,-3C,-1G	0	0	1	0	0	0	0	0	0	0	0	0
SNV:4C,5C	0	0	1	0	0	0	0	0	0	0	0	0
SNV:-12C,-9A,1G,4G	0	0	1	0	0	0	0	0	0	0	0	0
SNV:-15G,4G	0	0	1	0	0	0	0	0	0	0	0	0
SNV:-10G,-2C,-1T,2T	0	0	1	0	0	0	0	0	0	0	0	0
SNV:-9A,-6C	0	0	1	0	0	0	0	0	0	0	0	0
SNV:-8A,-4A	0	0	1	0	0	0	0	0	0	0	0	0
SNV:-6G,3T	0	0	1	0	0	0	0	0	0	0	0	0
SNV:-8C,-4C,5C	0	0	1	0	0	0	0	0	0	0	0	0
SNV:-15A,-11A,-7A	0	0	1	0	0	0	0	0	0	0	0	0
SNV:-1C,6T	0	0	1	0	0	0	0	0	0	0	0	0
SNV:-2A,4G	0	0	1	0	0	0	0	0	0	0	0	0
SNV:-13A,1T,3T,4G	0	0	1	0	0	0	0	0	0	0	0	0
SNV:-17C,-12T,-10G,-2T	0	0	1	0	0	0	0	0	0	0	0	0
SNV:-3C,1G,2A,6T	0	0	1	0	0	0	0	0	0	0	0	0
SNV:-11C,-10G,4C	0	0	1	0	0	0	0	0	0	0	0	0
SNV:-6C,-1T	0	0	1	0	0	0	0	0	0	0	0	0
SNV:-12T,-10G,-8C,-7C,5C	0	0	1	0	0	0	0	0	0	0	0	0
SNV:-16A,-10G,-3C,-2T	0	0	1	0	0	0	0	0	0	0	0	0
SNV:-13T,-4G,-2T,2T,4G,6A	0	0	1	0	0	0	0	0	0	0	0	0
SNV:-9A,-8G,1G	0	0	1	0	0	0	0	0	0	0	0	0
SNV:-12C,-7C	0	0	1	0	0	0	0	0	0	0	0	0
SNV:-8A,-6A	0	0	1	0	0	0	0	0	0	0	0	0
SNV:-6A,1G,5T	0	0	1	0	0	0	0	0	0	0	0	0
SNV:-10C,3C,5C	0	0	1	0	0	0	0	0	0	0	0	0
SNV:2A,5C,6C	0	0	1	0	0	0	0	0	0	0	0	0
SNV:-12T,-10G,1T,6T	0	0	1	0	0	0	0	0	0	0	0	0
SNV:-12C,2T,6C	0	0	1	0	0	0	0	0	0	0	0	0
SNV:-12G,-2C,-1T,5C,6T	0	0	1	0	0	0	0	0	0	0	0	0
SNV:-12C,-1T,1C,2C,5T	0	0	1	0	0	0	0	0	0	0	0	0
SNV:-15C,-2A,-1T,3G	0	0	1	0	0	0	0	0	0	0	0	0
SNV:-10G,-8C,4G	0	0	1	0	0	0	0	0	0	0	0	0
SNV:-11A,-8A,3T	0	0	1	0	0	0	0	0	0	0	0	0
SNV:-12T,-8A,3T	0	0	1	0	0	0	0	0	0	0	0	0
SNV:-12C,-2C	0	0	1	0	0	0	0	0	0	0	0	0
SNV:-1T,2C	0	0	1	0	0	0	0	0	0	0	0	0
SNV:-13T,-2C,-1T	0	0	1	0	0	0	0	0	0	0	0	0
SNV:-8C,-1T,1C,6T	0	0	1	0	0	0	0	0	0	0	0	0
SNV:-8G,1C,4C	0	0	1	0	0	0	0	0	0	0	0	0
SNV:-3G,-1G,5A	0	0	1	0	0	0	0	0	0	0	0	0
SNV:-12C,-7A	0	0	1	0	0	0	0	0	0	0	0	0
SNV:-15G,-4G,3T	0	0	1	0	0	0	0	0	0	0	0	0
SNV:-17C,-11T,-5A,-2C,-1T	0	0	1	0	0	0	0	0	0	0	0	0
SNV:-15C,-1T	0	0	1	0	0	0	0	0	0	0	0	0
SNV:-7C,-6G,-1T	0	0	1	0	0	0	0	0	0	0	0	0
SNV:-7G,-1G	0	0	1	0	0	0	0	0	0	0	0	0
SNV:-15A,-12C,-8G	0	0	1	0	0	0	0	0	0	0	0	0
SNV:-11T,5T,6T	0	0	1	0	0	0	0	0	0	0	0	0
SNV:-12C,2A,3G	0	0	1	0	0	0	0	0	0	0	0	0
SNV:-9A,-7C	0	0	1	0	0	0	0	0	0	0	0	0
SNV:-17C,-15C,-11C,-8G,-2T,-1G,1G	0	0	1	0	0	0	0	0	0	0	0	0
SNV:4A,5T	0	0	1	0	0	0	0	0	0	0	0	0
SNV:-12C,-2A,-1T,1G	0	0	1	0	0	0	0	0	0	0	0	0
SNV:-12C,-8C,2C,4A,5T	0	0	1	0	0	0	0	0	0	0	0	0
SNV:-9T,5A	0	0	1	0	0	0	0	0	0	0	0	0
SNV:-17C,-15A,-2T	0	0	1	0	0	0	0	0	0	0	0	0
SNV:-15C,-12G,-4G	0	0	1	0	0	0	0	0	0	0	0	0
SNV:-17G,4G	0	0	1	0	0	0	0	0	0	0	0	0
SNV:-1T,4C,6A	0	0	1	0	0	0	0	0	0	0	0	0
SNV:-11T,-2T,-1G,1C,2C,6T	0	0	1	0	0	0	0	0	0	0	0	0
SNV:-16A,-12C,-4C	0	0	1	0	0	0	0	0	0	0	0	0
SNV:-12C,-11C	0	0	1	0	0	0	0	0	0	0	0	0
SNV:-15A,-7C,3C,5T	0	0	1	0	0	0	0	0	0	0	0	0
SNV:-11T,-8G	0	0	1	0	0	0	0	0	0	0	0	0
SNV:-17C,-16A,-8G,-3G	0	0	1	0	0	0	0	0	0	0	0	0
SNV:-17C,3C	0	0	1	0	0	0	0	0	0	0	0	0
SNV:1G,2A,5T	0	0	1	0	0	0	0	0	0	0	0	0
SNV:-12C,-1C	0	0	1	0	0	0	0	0	0	0	0	0
SNV:-1C,2T,3C	0	0	1	0	0	0	0	0	0	0	0	0
SNV:-4G,5T,6T	0	0	1	0	0	0	0	0	0	0	0	0
SNV:-17G,-9G,4G,5T	0	0	1	0	0	0	0	0	0	0	0	0
SNV:-11T,-3G	0	0	1	0	0	0	0	0	0	0	0	0
SNV:-8A,4A	0	0	1	0	0	0	0	0	0	0	0	0
SNV:-4G,6T	0	0	1	0	0	0	0	0	0	0	0	0
SNV:-16G,-3G	0	0	1	0	0	0	0	0	0	0	0	0
SNV:-9T,3G	0	0	1	0	0	0	0	0	0	0	0	0
SNV:-7C,-2C,-1T,1G	0	0	1	0	0	0	0	0	0	0	0	0
SNV:1T,3T	0	0	1	0	0	0	0	0	0	0	0	0
SNV:-11A,-10G,-6A,3C	0	0	1	0	0	0	0	0	0	0	0	0
SNV:-8A,5T	0	0	1	0	0	0	0	0	0	0	0	0
SNV:-15C,-13T	0	0	1	0	0	0	0	0	0	0	0	0
SNV:-4G,4C,5T	0	0	1	0	0	0	0	0	0	0	0	0
SNV:-16A,-4C,-3G,3T	0	0	1	0	0	0	0	0	0	0	0	0
SNV:-8C,-6C,-3G,-2T	0	0	1	0	0	0	0	0	0	0	0	0
SNV:-14A,-10A,-9A,3G,6C	0	0	1	0	0	0	0	0	0	0	0	0
SNV:-11T,-5A	0	0	1	0	0	0	0	0	0	0	0	0
SNV:-3T,6T	0	0	1	0	0	0	0	0	0	0	0	0
SNV:-15A,1G,3T	0	0	1	0	0	0	0	0	0	0	0	0
SNV:1C,2T,4A	0	0	1	0	0	0	0	0	0	0	0	0
SNV:-16T,-2C,-1T,4C	0	0	1	0	0	0	0	0	0	0	0	0
SNV:-2C,-1T,4C,6T	0	0	1	0	0	0	0	0	0	0	0	0
SNV:-15C,-6C,-4A	0	0	1	0	0	0	0	0	0	0	0	0
SNV:-15C,-3C	0	0	1	0	0	0	0	0	0	0	0	0
SNV:-6C,-2A	0	0	1	0	0	0	0	0	0	0	0	0
SNV:-14A,-13A,-11T,6T	0	0	1	0	0	0	0	0	0	0	0	0
SNV:-17G,1G,6C	0	0	1	0	0	0	0	0	0	0	0	0
SNV:-8A,-4C	0	0	1	0	0	0	0	0	0	0	0	0
SNV:-11T,-2T	0	0	1	0	0	0	0	0	0	0	0	0
SNV:-17G,-16A,-8C	0	0	1	0	0	0	0	0	0	0	0	0
SNV:-15C,-10C,-9G,-2T	0	0	1	0	0	0	0	0	0	0	0	0
SNV:2C,5T,6C	0	0	1	0	0	0	0	0	0	0	0	0
SNV:-17G,-2A,2C,4G,6C	0	0	1	0	0	0	0	0	0	0	0	0
SNV:-6C,-4G	0	0	1	0	0	0	0	0	0	0	0	0
SNV:-15A,-8G,-2C	0	0	1	0	0	0	0	0	0	0	0	0
SNV:-12C,-10G,-1C,6T	0	0	1	0	0	0	0	0	0	0	0	0
SNV:2T,5C	0	0	1	0	0	0	0	0	0	0	0	0
SNV:-16G,-2T	0	0	1	0	0	0	0	0	0	0	0	0
SNV:-14T,-13T,6A	0	0	1	0	0	0	0	0	0	0	0	0
SNV:-7C,-1T	0	0	1	0	0	0	0	0	0	0	0	0
SNV:-2A,-1T,3C	0	0	1	0	0	0	0	0	0	0	0	0
SNV:1T,3G,4A	0	0	1	0	0	0	0	0	0	0	0	0
SNV:-4C,-1T,1T	0	0	1	0	0	0	0	0	0	0	0	0
SNV:-8C,-1G,2C,3T	0	0	1	0	0	0	0	0	0	0	0	0
SNV:-15C,-12C,-5T,4G	0	0	1	0	0	0	0	0	0	0	0	0
SNV:-2C,5C	0	0	1	0	0	0	0	0	0	0	0	0
SNV:-1T,1C	0	0	1	0	0	0	0	0	0	0	0	0
SNV:-15A,-10C,-8G	0	0	1	0	0	0	0	0	0	0	0	0
SNV:-13A,-2C,-1T	0	0	1	0	0	0	0	0	0	0	0	0
SNV:-17C,-12T,6T	0	0	1	0	0	0	0	0	0	0	0	0
SNV:-11A,-4C,3C,4A	0	0	1	0	0	0	0	0	0	0	0	0
SNV:-8A,-7G,-4A	0	0	1	0	0	0	0	0	0	0	0	0
SNV:-7G,-4G	0	0	1	0	0	0	0	0	0	0	0	0
SNV:-15A,-10G,-4C,1T,4C	0	0	1	0	0	0	0	0	0	0	0	0
SNV:-14T,3T	0	0	1	0	0	0	0	0	0	0	0	0
SNV:-12C,-11T,4A	0	0	1	0	0	0	0	0	0	0	0	0
SNV:-9T,-2C,6T	0	0	1	0	0	0	0	0	0	0	0	0
SNV:-14A,4G,6T	0	0	1	0	0	0	0	0	0	0	0	0
SNV:-3T,-2C	0	0	1	0	0	0	0	0	0	0	0	0
SNV:-4C,6C	0	0	1	0	0	0	0	0	0	0	0	0
SNV:-3T,1T,3T,5T	0	0	1	0	0	0	0	0	0	0	0	0
SNV:-12C,-8G	0	0	1	0	0	0	0	0	0	0	0	0
SNV:-14A,-9G,-8A	0	0	1	0	0	0	0	0	0	0	0	0
SNV:-1T,5T	0	0	1	0	0	0	0	0	0	0	0	0
SNV:-17C,-16T,2T	0	0	0	1	0	0	0	0	0	0	0	0
SNV:-16T,5A,6T	0	0	0	1	0	0	0	0	0	0	0	0
SNV:-1G,1T	0	0	0	1	0	0	0	0	0	0	0	0
SNV:-7C,-6C	0	0	0	1	0	0	0	0	0	0	0	0
SNV:-17C,-10G	0	0	0	1	0	0	0	0	0	0	0	0
SNV:2T,4G,6A	0	0	0	1	0	0	0	0	0	0	0	0
SNV:-17C,-15C,-10G,-8C,-4G,-3C,-1C,3C,5T,6T	0	0	0	1	0	0	0	0	0	0	0	0
SNV:-7A,6T	0	0	0	1	0	0	0	0	0	0	0	0
SNV:-15C,-12C,-8C,-4C	0	0	0	1	0	0	0	0	0	0	0	0
SNV:-17C,-15C,-13A,-10C,-9T,-3G	0	0	0	1	0	0	0	0	0	0	0	0
SNV:-12C,-3T,6A	0	0	0	1	0	0	0	0	0	0	0	0
SNV:-15A,-14A,-4G	0	0	0	1	0	0	0	0	0	0	0	0
SNV:-13A,-2T,2A,3G	0	0	0	1	0	0	0	0	0	0	0	0
SNV:-17C,-8A	0	0	0	1	0	0	0	0	0	0	0	0
SNV:-7C,-2T	0	0	0	1	0	0	0	0	0	0	0	0
SNV:-17T,-15A,-10A,-9A,-8G,-4A	0	0	0	1	0	0	0	0	0	0	0	0
SNV:-16A,-15C,-10A,-8G,-6C,-5A,-4G	0	0	0	1	0	0	0	0	0	0	0	0
SNV:-4A,-2T	0	0	0	1	0	0	0	0	0	0	0	0
SNV:-11T,-8C	0	0	0	1	0	0	0	0	0	0	0	0
SNV:-15C,-11T	0	0	0	1	0	0	0	0	0	0	0	0
SNV:-14G,-12C,-4C	0	0	0	1	0	0	0	0	0	0	0	0
SNV:-17C,-13T,-2T,1T,4C	0	0	0	1	0	0	0	0	0	0	0	0
SNV:-9T,-4A,-3G	0	0	0	1	0	0	0	0	0	0	0	0
SNV:2A,3T	0	0	0	1	0	0	0	0	0	0	0	0
SNV:-2C,4C	0	0	0	1	0	0	0	0	0	0	0	0
SNV:-16G,-15A,-14A,-5T,4C	0	0	0	1	0	0	0	0	0	0	0	0
SNV:-8C,-1T,3T	0	0	0	1	0	0	0	0	0	0	0	0
SNV:-17C,-16G,-3T,-2C,-1T,1T	0	0	0	1	0	0	0	0	0	0	0	0
SNV:-15A,-4C,-1G	0	0	0	1	0	0	0	0	0	0	0	0
SNV:-2T,3T,6A	0	0	0	1	0	0	0	0	0	0	0	0
SNV:-9A,3C,6C	0	0	0	1	0	0	0	0	0	0	0	0
SNV:-8A,-6C,-5T,-4G,1C,4C	0	0	0	1	0	0	0	0	0	0	0	0
SNV:-8C,-3T,1G	0	0	0	1	0	0	0	0	0	0	0	0
SNV:-6G,-2C,-1T	0	0	0	1	0	0	0	0	0	0	0	0
SNV:-5G,3G,6T	0	0	0	1	0	0	0	0	0	0	0	0
SNV:-15A,-7C	0	0	0	1	0	0	0	0	0	0	0	0
SNV:-16A,-15C,5T	0	0	0	1	0	0	0	0	0	0	0	0
SNV:-9A,-6C,-4A	0	0	0	1	0	0	0	0	0	0	0	0
SNV:-2T,4G,6C	0	0	0	1	0	0	0	0	0	0	0	0
SNV:-1T,1G,2C,3C,6C	0	0	0	1	0	0	0	0	0	0	0	0
SNV:-14T,-12G,-2T,2C,3G,6T	0	0	0	1	0	0	0	0	0	0	0	0
SNV:-17T,4G	0	0	0	1	0	0	0	0	0	0	0	0
SNV:1G,4G,6C	0	0	0	1	0	0	0	0	0	0	0	0
SNV:-3C,-2T,-1T	0	0	0	1	0	0	0	0	0	0	0	0
SNV:-3C,2T	0	0	0	1	0	0	0	0	0	0	0	0
SNV:-1C,4G	0	0	0	1	0	0	0	0	0	0	0	0
SNV:1G,5A	0	0	0	1	0	0	0	0	0	0	0	0
SNV:-7C,-6A,-5G,-3T	0	0	0	1	0	0	0	0	0	0	0	0
SNV:-10A,-6G,5A	0	0	0	1	0	0	0	0	0	0	0	0
SNV:-6C,-2C	0	0	0	1	0	0	0	0	0	0	0	0
SNV:-3G,-2C,4G,5T	0	0	0	1	0	0	0	0	0	0	0	0
SNV:-7A,-4A,-1G	0	0	0	1	0	0	0	0	0	0	0	0
SNV:-17C,-12C,-3C,-2T,-1C,4G	0	0	0	1	0	0	0	0	0	0	0	0
SNV:2A,3G,4G,5T	0	0	0	1	0	0	0	0	0	0	0	0
SNV:-4C,2A,4C	0	0	0	1	0	0	0	0	0	0	0	0
SNV:-10C,-7G	0	0	0	1	0	0	0	0	0	0	0	0
SNV:-5A,3G	0	0	0	1	0	0	0	0	0	0	0	0
SNV:-4A,-1C,3G	0	0	0	1	0	0	0	0	0	0	0	0
SNV:-4G,4C	0	0	0	1	0	0	0	0	0	0	0	0
SNV:-15C,-9G,4A	0	0	0	1	0	0	0	0	0	0	0	0
SNV:-14A,4G,6C	0	0	0	1	0	0	0	0	0	0	0	0
SNV:-15C,-12C,2A	0	0	0	1	0	0	0	0	0	0	0	0
SNV:-10C,-8C,1T	0	0	0	1	0	0	0	0	0	0	0	0
SNV:-2C,4G	0	0	0	1	0	0	0	0	0	0	0	0
SNV:-16A,2A	0	0	0	1	0	0	0	0	0	0	0	0
SNV:-12C,-7G	0	0	0	1	0	0	0	0	0	0	0	0
SNV:-16G,-13G,-10C,-7G,4G,5C	0	0	0	1	0	0	0	0	0	0	0	0
SNV:-10A,-9A,-2C,-1T	0	0	0	1	0	0	0	0	0	0	0	0
SNV:-15A,-8A,3T	0	0	0	1	0	0	0	0	0	0	0	0
SNV:-2T,-1G,1G	0	0	0	1	0	0	0	0	0	0	0	0
SNV:-17G,-15C	0	0	0	1	0	0	0	0	0	0	0	0
SNV:-1C,5T,6C	0	0	0	1	0	0	0	0	0	0	0	0
SNV:-8G,-2C,-1T,1G	0	0	0	1	0	0	0	0	0	0	0	0
SNV:-17G,-15C,-11C,-8G,-7C,-1C,1G,2T,3C,6T	0	0	0	1	0	0	0	0	0	0	0	0
SNV:-12G,-11C,-10G,-1C,1G	0	0	0	1	0	0	0	0	0	0	0	0
SNV:-8A,-2C,-1T	0	0	0	1	0	0	0	0	0	0	0	0
SNV:-17C,3T	0	0	0	1	0	0	0	0	0	0	0	0
SNV:-16T,1T	0	0	0	1	0	0	0	0	0	0	0	0
SNV:-15G,-11T,-7A,-3C,-1G,1G,3C	0	0	0	1	0	0	0	0	0	0	0	0
SNV:-15C,-12C,-11A,-8C	0	0	0	1	0	0	0	0	0	0	0	0
SNV:-10C,-8G	0	0	0	1	0	0	0	0	0	0	0	0
SNV:-3C,-2C,-1T,3G	0	0	0	1	0	0	0	0	0	0	0	0
SNV:-2C,1G	0	0	0	1	0	0	0	0	0	0	0	0
SNV:-17C,-15C,-10C,-4A	0	0	0	1	0	0	0	0	0	0	0	0
SNV:1G,2T,6C	0	0	0	1	0	0	0	0	0	0	0	0
SNV:-10G,-7C,-4G,5T	0	0	0	1	0	0	0	0	0	0	0	0
SNV:-14T,-2C,-1T,6T	0	0	0	1	0	0	0	0	0	0	0	0
SNV:-12C,-11T,1C,3C,6T	0	0	0	1	0	0	0	0	0	0	0	0
SNV:-7C,-6A,1C,5T	0	0	0	1	0	0	0	0	0	0	0	0
SNV:-5A,-2T,6A	0	0	0	1	0	0	0	0	0	0	0	0
SNV:-15C,-11C,4G	0	0	0	1	0	0	0	0	0	0	0	0
SNV:-15C,-8C,-2C,-1T	0	0	0	1	0	0	0	0	0	0	0	0
SNV:-15C,-10A,3T,4G	0	0	0	1	0	0	0	0	0	0	0	0
SNV:-15C,3G,6C	0	0	0	1	0	0	0	0	0	0	0	0
SNV:-14A,3G,5T,6C	0	0	0	1	0	0	0	0	0	0	0	0
SNV:-2T,4C	0	0	0	1	0	0	0	0	0	0	0	0
SNV:-10C,-4G,4G	0	0	0	1	0	0	0	0	0	0	0	0
SNV:-5T,-2C,-1T	0	0	0	1	0	0	0	0	0	0	0	0
SNV:-15A,-14T,4G,5T	0	0	0	1	0	0	0	0	0	0	0	0
SNV:-17C,-3C,-2A	0	0	0	1	0	0	0	0	0	0	0	0
SNV:2C,3C,6C	0	0	0	1	0	0	0	0	0	0	0	0
SNV:-14A,-12C,-3C,-2T	0	0	0	1	0	0	0	0	0	0	0	0
SNV:-4C,6T	0	0	0	1	0	0	0	0	0	0	0	0
SNV:-17T,-2C,-1T	0	0	0	1	0	0	0	0	0	0	0	0
SNV:-9G,-2C,-1T	0	0	0	1	0	0	0	0	0	0	0	0
SNV:-10G,-7G,-4C	0	0	0	1	0	0	0	0	0	0	0	0
SNV:-12G,-11A,-6C,-1C	0	0	0	1	0	0	0	0	0	0	0	0
SNV:-16A,6T	0	0	0	1	0	0	0	0	0	0	0	0
SNV:-12T,-2C,-1T	0	0	0	1	0	0	0	0	0	0	0	0
SNV:-11T,-4G	0	0	0	1	0	0	0	0	0	0	0	0
SNV:-15C,-10C,-1C,4C	0	0	0	1	0	0	0	0	0	0	0	0
SNV:-12T,-1G,1G	0	0	0	1	0	0	0	0	0	0	0	0
SNV:-15C,-12C,-10G,-3T	0	0	0	1	0	0	0	0	0	0	0	0
SNV:3G,4C,5C	0	0	0	1	0	0	0	0	0	0	0	0
SNV:-12G,-4C	0	0	0	1	0	0	0	0	0	0	0	0
SNV:4G,5C,6A	0	0	0	1	0	0	0	0	0	0	0	0
SNV:-8C,-3G,-1C,5T	0	0	0	1	0	0	0	0	0	0	0	0
SNV:1C,4C,6A	0	0	0	1	0	0	0	0	0	0	0	0
SNV:-9G,-8A	0	0	0	1	0	0	0	0	0	0	0	0
SNV:-15C,-4C	0	0	0	1	0	0	0	0	0	0	0	0
SNV:-12C,-8C,-7G,-3T,-1T,1G,4C	0	0	0	1	0	0	0	0	0	0	0	0
SNV:-8G,-6A,3T	0	0	0	1	0	0	0	0	0	0	0	0
SNV:-10A,-8G	0	0	0	1	0	0	0	0	0	0	0	0
SNV:-15C,-11A,-4C,-1G	0	0	0	1	0	0	0	0	0	0	0	0
SNV:-15A,-9G,-1C	0	0	0	1	0	0	0	0	0	0	0	0
SNV:-16T,-15C,2A,4G	0	0	0	1	0	0	0	0	0	0	0	0
SNV:-14A,-2T,5T	0	0	0	1	0	0	0	0	0	0	0	0
SNV:-6A,-1T,3G,4G	0	0	0	1	0	0	0	0	0	0	0	0
SNV:-15C,-4C,-2C,4G	0	0	0	1	0	0	0	0	0	0	0	0
SNV:-9T,-1C	0	0	0	1	0	0	0	0	0	0	0	0
SNV:-9A,-2C,-1T,5T	0	0	0	1	0	0	0	0	0	0	0	0
SNV:-6C,-4C	0	0	0	1	0	0	0	0	0	0	0	0
SNV:-15C,-10A,-8C	0	0	0	1	0	0	0	0	0	0	0	0
SNV:-12C,-2T,2T	0	0	0	1	0	0	0	0	0	0	0	0
SNV:-1T,2T,6A	0	0	0	1	0	0	0	0	0	0	0	0
SNV:-2T,3G,6T	0	0	0	1	0	0	0	0	0	0	0	0
SNV:4C,5T,6T	0	0	0	1	0	0	0	0	0	0	0	0
SNV:1C,2C,6T	0	0	0	1	0	0	0	0	0	0	0	0
SNV:-6C,3G,4G,6C	0	0	0	1	0	0	0	0	0	0	0	0
SNV:-17C,-11A,-5T,3T	0	0	0	1	0	0	0	0	0	0	0	0
SNV:-8G,-4G,-2C,-1T	0	0	0	1	0	0	0	0	0	0	0	0
SNV:-17C,-15G,-12C,4G	0	0	0	1	0	0	0	0	0	0	0	0
SNV:-12G,-6C,2C	0	0	0	1	0	0	0	0	0	0	0	0
SNV:-17C,-2C,-1T	0	0	0	1	0	0	0	0	0	0	0	0
SNV:-5T,-4C	0	0	0	1	0	0	0	0	0	0	0	0
SNV:-14A,-13A,-12G,-10A,-6C,-3C,-1C	0	0	0	1	0	0	0	0	0	0	0	0
SNV:-12C,-9A	0	0	0	1	0	0	0	0	0	0	0	0
SNV:1G,3G,4G	0	0	0	1	0	0	0	0	0	0	0	0
SNV:-7A,-4C,-3C	0	0	0	1	0	0	0	0	0	0	0	0
SNV:-15C,-8C,3G	0	0	0	1	0	0	0	0	0	0	0	0
SNV:-8C,3T,6C	0	0	0	1	0	0	0	0	0	0	0	0
SNV:-15A,-6G,-2C,-1T	0	0	0	1	0	0	0	0	0	0	0	0
SNV:-2C,-1T,1C,6A	0	0	0	1	0	0	0	0	0	0	0	0
SNV:-5T,-4C,-1C,1C	0	0	0	1	0	0	0	0	0	0	0	0
SNV:2C,3G	0	0	0	0	1	0	0	0	0	0	0	0
SNV:-6A,-3C,2A	0	0	0	0	1	0	0	0	0	0	0	0
SNV:-12C,-3C,-2T,-1C	0	0	0	0	1	0	0	0	0	0	0	0
SNV:1T,5T	0	0	0	0	1	0	0	0	0	0	0	0
SNV:-15G,-12G	0	0	0	0	1	0	0	0	0	0	0	0
SNV:-3T,-1G,3G	0	0	0	0	1	0	0	0	0	0	0	0
SNV:-7C,-6C,-5G,-4C	0	0	0	0	1	0	0	0	0	0	0	0
SNV:-15G,-13A	0	0	0	0	0	1	0	0	0	0	0	0
SNV:-7G,-3T,-2T,-1C,1G	0	0	0	0	0	1	0	0	0	0	0	0
SNV:-13A,-2T,2A	0	0	0	0	0	1	0	0	0	0	0	0
SNV:-9A,5T	0	0	0	0	0	1	0	0	0	0	0	0
SNV:-15G,-11A	0	0	0	0	0	1	0	0	0	0	0	0
SNV:-13G,-12T	0	0	0	0	0	1	0	0	0	0	0	0
SNV:-13T,-8C	0	0	0	0	0	1	0	0	0	0	0	0
SNV:2A,3G,5T	0	0	0	0	0	1	0	0	0	0	0	0
SNV:-14T,-13A	0	0	0	0	0	1	0	0	0	0	0	0
SNV:-15G,-7C,-6G,-5A	0	0	0	0	0	1	0	0	0	0	0	0
SNV:-12T,1C	0	0	0	0	0	1	0	0	0	0	0	0
SNV:-3G,1G	0	0	0	0	0	1	0	0	0	0	0	0
SNV:-14A,-6A	0	0	0	0	0	0	1	0	0	0	0	0
SNV:-7G,-2C,-1T	0	0	0	0	0	0	1	0	0	0	0	0
SNV:-9G,-3C,3G	0	0	0	0	0	0	1	0	0	0	0	0
SNV:-16G,-9A,5C	0	0	0	0	0	0	1	0	0	0	0	0
SNV:1C,2A,3G	0	0	0	0	0	0	1	0	0	0	0	0
SNV:-9T,-3G	0	0	0	0	0	0	1	0	0	0	0	0
SNV:-9A,3T	0	0	0	0	0	0	1	0	0	0	0	0
SNV:-6C,1T,3G,4A,5T	0	0	0	0	0	0	1	0	0	0	0	0
SNV:-17G,-15A,-13A	0	0	0	0	0	0	1	0	0	0	0	0
SNV:-13A,-12G,3G	0	0	0	0	0	0	1	0	0	0	0	0
SNV:-12G,6T	0	0	0	0	0	0	1	0	0	0	0	0
SNV:-13A,-4A,-2C,-1T	0	0	0	0	0	0	1	0	0	0	0	0
SNV:-15A,-9A,-6A,3T	0	0	0	0	0	0	1	0	0	0	0	0
SNV:-6C,1G	0	0	0	0	0	0	1	0	0	0	0	0
SNV:-4A,1T	0	0	0	0	0	0	1	0	0	0	0	0
SNV:-12G,-2C,-1T	0	0	0	0	0	0	1	0	0	0	0	0
SNV:-15C,-11T,6T	0	0	0	0	0	0	1	0	0	0	0	0
SNV:-13A,2A	0	0	0	0	0	0	0	1	0	0	0	0
SNV:-6A,1T	0	0	0	0	0	0	0	1	0	0	0	0
SNV:-16T,-15G,-14A,-13T,-11A	0	0	0	0	0	0	0	1	0	0	0	0
SNV:-2C,-1T,2C	0	0	0	0	0	0	0	1	0	0	0	0
SNV:-14T,-8C,-2T	0	0	0	0	0	0	0	1	0	0	0	0
SNV:-12G,-9A,-2C,-1T	0	0	0	0	0	0	0	1	0	0	0	0
SNV:-13G,-2A	0	0	0	0	0	0	0	0	1	0	0	0
SNV:-9A,1T,6T	0	0	0	0	0	0	0	0	1	0	0	0
SNV:-6A,3T	0	0	0	0	0	0	0	0	1	0	0	0
SNV:-6C,5T	0	0	0	0	0	0	0	0	1	0	0	0
SNV:-6G,-4A	0	0	0	0	0	0	0	0	1	0	0	0
SNV:-3C,1G	0	0	0	0	0	0	0	0	0	1	0	0
SNV:-17G,1C	0	0	0	0	0	0	0	0	0	1	0	0
SNV:-10G,-1G,3G	0	0	0	0	0	0	0	0	0	1	0	0
SNV:-15G,5T	0	0	0	0	0	0	0	0	0	1	0	0
SNV:-16T,-15C	0	0	0	0	0	0	0	0	0	1	0	0
SNV:2T,3T,4G,5T	0	0	0	0	0	0	0	0	0	1	0	0
SNV:-14T,2C	0	0	0	0	0	0	0	0	0	1	0	0
SNV:-15G,-13A,-11A	0	0	0	0	0	0	0	0	0	1	0	0
SNV:-9A,-6A	0	0	0	0	0	0	0	0	0	1	0	0
SNV:-14T,3G	0	0	0	0	0	0	0	0	0	1	0	0
SNV:-15G,-13T	0	0	0	0	0	0	0	0	0	1	0	0
SNV:-13A,-9T,-6G,-3G	0	0	0	0	0	0	0	0	0	1	0	0
SNV:-15C,-14A,-11C,-5A,-4G	0	0	0	0	0	0	0	0	0	1	0	0
SNV:-15C,-3T,-1G	0	0	0	0	0	0	0	0	0	1	0	0
SNV:-12G,1T	0	0	0	0	0	0	0	0	0	1	0	0
SNV:-17C,-16T,-13A,-9T,3T	0	0	0	0	0	0	0	0	0	0	1	0
SNV:-17G,-13G	0	0	0	0	0	0	0	0	0	0	1	0
SNV:-13A,-2T	0	0	0	0	0	0	0	0	0	0	0	1
SNV:-17C,-10G,-5T,-2T,6T	0	0	0	0	0	0	0	0	0	0	0	1
-3:3D	160	39207	33606	12626	66	3643	3712	1608	5	2335	1769	886
-1:1I	41	8728	8801	4369	11	612	755	396	5	434	482	187
-1:1D	30	6824	8753	3615	13	884	1028	459	0	495	492	228
1:1I	5	996	1019	408	1	64	61	75	0	52	68	23
1:2I	4	809	754	315	0	53	80	16	1	45	53	26
-3:2D	8	618	688	531	4	49	61	42	0	35	31	11
-4:4D	3	617	613	267	0	55	54	29	0	15	34	21
-12:12D	1	680	422	255	6	45	50	35	0	31	11	15
1:2D	3	472	472	236	0	38	51	33	0	27	40	11
-12:23D	0	454	560	181	0	32	45	28	0	22	8	12
1:4D	2	401	437	215	0	52	55	38	0	34	16	9
1:6I	2	372	406	145	0	14	58	33	0	35	17	8
-1:2I	0	263	165	251	0	17	23	21	0	10	0	1
-2:12D	2	192	395	71	6	25	22	6	1	10	13	3
-5:5D	0	287	168	184	0	12	17	9	0	4	6	6
-4:3D	3	258	233	103	0	30	17	3	0	7	18	3
-3:5D	3	244	272	54	0	24	26	8	0	24	5	2
-7:22D	1	176	255	61	0	29	33	4	0	11	0	5
-4:7D	0	116	269	64	0	41	22	12	0	21	16	13
1:9I	0	189	210	70	0	0	9	5	0	1	0	7
-7:7D	0	131	175	76	0	18	17	23	0	11	9	0
-2:6D	0	147	245	30	0	7	4	3	0	11	0	0
1:4I	0	117	202	69	1	13	12	4	0	13	4	7
-6:6D	5	167	148	75	0	8	8	1	0	12	8	1
1:8I	1	203	143	26	0	3	17	7	0	6	9	4
-2:1D	2	79	240	1	3	12	19	15	0	6	26	2
1:5I	2	86	195	35	0	17	9	1	0	11	0	11
1:17I	0	83	123	114	0	0	20	16	0	0	3	6
-8:7D	0	148	91	57	5	15	5	8	0	3	12	0
1:16I	0	32	200	73	0	5	10	4	0	8	2	7
1:10I	1	147	97	50	0	7	10	13	0	6	1	1
1:3I	0	149	121	28	0	6	5	9	0	7	0	1
1:11I	0	44	121	72	0	21	20	18	0	3	11	0
-1:4I	0	77	141	59	0	0	0	16	0	3	1	0
2:3D	3	104	113	44	0	10	7	5	0	2	4	4
1:15D	0	99	110	70	0	7	6	0	0	3	0	1
-5:4D	1	143	98	1	1	18	9	4	0	12	0	4
1:14I	0	86	144	18	0	0	7	11	0	6	0	7
-3:1D	4	65	137	1	1	18	16	6	0	13	8	1
-11:16D	0	123	46	85	0	3	7	0	0	1	0	3
1:6D	0	101	115	31	0	2	4	9	0	2	3	1
1:15I	0	115	120	0	0	3	18	1	0	3	7	0
-6:9D	0	121	17	90	0	5	0	13	0	10	8	0
-2:7D	0	107	16	99	0	6	14	12	0	1	3	0
-8:1I,-3:3D	0	53	70	83	0	16	12	0	0	11	6	5
1:7I	0	108	94	0	0	16	15	0	0	3	18	0
1:30I	0	47	77	87	0	0	23	0	0	1	2	6
1:7D	0	22	111	71	0	0	6	5	0	0	4	3
1:48I	0	29	61	102	0	0	8	15	0	3	0	3
-3:14D	0	88	86	10	0	14	5	3	0	5	8	0
1:21I	1	23	77	100	0	2	3	6	0	0	0	4
-9:9D	0	47	102	29	0	4	1	8	0	4	16	0
-9:12D	0	27	111	46	0	4	7	0	0	3	0	2
-14:14D	0	126	34	0	0	7	11	9	0	3	3	2
1:13I	1	67	62	19	0	3	18	7	0	0	14	3
-10:26D	0	52	121	0	0	3	4	9	0	5	0	0
1:18I	0	18	143	25	0	0	2	0	0	0	0	0
-1:6I	0	80	21	60	0	15	0	3	0	7	0	2
1:5D	0	41	64	63	0	0	1	1	0	5	0	11
-11:17D	0	83	73	1	0	10	9	0	0	4	0	0
1:19I	0	23	54	73	0	15	5	0	0	2	6	1
-8:1D	19	21	63	33	4	7	12	3	3	5	1	5
1:24I	1	64	86	0	0	0	18	0	0	7	0	0
1:12I	0	24	122	0	0	0	13	0	0	6	7	4
2:1D	0	32	86	33	0	11	1	4	0	0	2	1
1:33I	0	67	45	37	0	0	11	0	0	0	0	9
-5:3D	2	94	6	42	2	3	2	0	0	0	16	0
1:17D	1	79	78	0	1	5	0	0	0	0	3	0
-1:9I	0	21	129	1	0	0	15	0	0	0	0	1
5:1D	33	34	41	35	2	0	3	6	3	2	4	3
1:8D	0	86	48	0	0	11	5	7	0	0	8	1
1:10D	0	71	38	41	0	8	4	0	0	1	0	0
-8:11D	0	41	53	48	0	1	13	4	0	1	0	0
1:27I	0	57	59	25	0	0	7	1	0	2	9	0
-7:10D	0	49	58	0	0	1	15	18	0	4	13	1
-1:4D	0	22	49	74	0	0	6	0	0	5	0	0
-1:2D	0	53	70	0	0	5	9	6	0	0	10	2
-2:10D	0	38	50	49	0	6	1	0	0	1	9	1
1:20I	0	40	71	0	0	6	8	9	0	3	9	8
-3:11D	0	24	77	49	0	0	4	0	0	0	0	0
-2:1I	0	30	97	3	0	2	3	6	0	0	5	1
-1:3I	0	42	22	55	0	6	10	0	0	4	8	0
-13:13D	0	32	51	39	0	3	10	0	0	4	5	0
-3:4D	1	62	48	2	0	0	8	19	0	2	0	0
1:35I	1	29	36	55	0	0	9	4	0	0	0	5
1:9D	0	64	54	0	0	4	0	0	0	9	6	2
1:28I	0	27	95	0	0	0	11	0	0	0	0	5
-25:26D	0	125	1	0	0	0	2	4	0	1	0	0
1:39I	0	6	80	40	0	0	2	4	0	0	0	1
-1:5I	0	58	52	0	0	1	5	0	0	5	3	6
-14:1D	21	19	40	26	0	0	8	4	1	2	3	3
1:29I	0	25	44	33	0	3	9	0	0	4	9	0
1:62I	0	9	41	57	0	2	2	13	0	2	0	0
-6:8D	0	88	1	20	0	0	4	2	0	4	3	3
-7:6D	0	0	21	75	0	14	8	2	0	2	0	2
-18:17D	0	43	68	1	0	1	3	0	0	3	4	0
-2:22D	0	52	30	22	0	3	10	0	0	3	1	2
1:44I	0	17	26	67	0	0	6	0	0	0	0	4
1:31I	0	0	100	0	0	5	0	13	0	0	0	0
-2:8D	0	12	65	1	0	5	19	5	0	2	5	3
-6:15D	0	71	31	12	0	0	0	0	0	2	0	0
1:55I	0	17	8	86	0	0	0	5	0	0	0	0
-12:11D	0	64	18	15	0	0	7	6	0	2	2	0
1:22I	0	12	49	25	0	0	5	17	0	1	0	4
-9:8D	1	44	46	12	0	0	8	0	0	1	0	0
-8:8D	0	33	59	1	1	5	4	1	0	1	3	4
1:23I	0	0	76	2	0	7	10	9	0	0	4	3
1:34I	0	9	44	29	0	8	4	10	0	0	0	6
1:37I	0	0	46	37	0	6	7	11	0	0	0	1
-16:30D	0	57	18	17	0	0	5	0	0	1	7	2
1:26D	0	36	0	60	0	6	1	0	0	0	4	0
-12:14D	0	33	36	31	0	0	0	0	0	0	3	0
-1:8I	0	33	61	0	0	3	3	3	0	0	0	0
-17:16D	0	38	24	24	0	0	3	0	0	8	5	0
-6:19D	0	55	28	0	0	4	1	6	0	1	0	3
1:40I	0	0	1	68	0	0	8	17	0	1	0	0
-6:24D	1	0	76	0	0	3	6	8	0	0	0	0
-7:19D	0	0	0	93	0	0	0	1	0	0	0	0
-8:1I,-4:4D	1	14	58	0	0	10	5	0	0	5	0	0
-11:15D	0	28	47	0	0	1	5	2	0	5	0	0
-12:28D	0	1	52	35	0	0	0	0	0	0	0	0
-1:40I	0	1	30	57	0	0	0	0	0	0	0	0
-4:8D	0	1	59	25	0	0	3	0	0	0	0	0
-10:4D	1	0	59	0	0	0	8	0	0	2	16	0
1:57I	1	20	27	20	0	1	6	0	0	0	6	5
-6:5D	0	17	53	0	0	1	7	2	0	4	0	2
-5:12D	0	21	37	1	0	12	6	0	0	8	0	1
1:47I	0	0	18	55	0	0	1	6	0	0	2	4
-14:21D	0	37	29	0	0	6	0	6	0	0	7	0
-14:13D	0	35	45	0	0	2	2	0	0	0	0	0
1:38I	0	0	52	11	0	0	11	7	0	0	0	2
-10:6D	0	72	1	0	0	0	7	0	0	0	0	0
-1:32I	0	23	20	28	0	0	0	9	0	0	0	0
-5:1I,-3:3D	0	1	74	0	0	0	2	3	0	0	0	0
1:66I	0	0	35	41	0	0	4	0	0	0	0	0
2:1I	1	60	10	2	0	3	0	0	0	1	2	0
-6:7D	1	20	1	48	0	7	0	1	0	0	0	0
-2:11D	3	53	0	1	0	8	0	0	0	10	0	3
-1:22I	0	0	1	77	0	0	0	0	0	0	0	0
-1:10I	0	47	0	27	0	0	3	0	0	0	0	0
1:32I	0	1	42	24	0	0	1	7	0	0	0	0
-1:17I	0	34	40	0	0	0	0	0	0	0	0	0
1:59I	1	7	15	40	0	0	0	3	0	1	3	3
-1:16I	0	39	0	33	0	0	0	0	0	1	0	0
1:36I	0	14	1	55	0	0	0	2	0	1	0	0
-1:7I	0	0	67	0	0	3	0	0	0	3	0	0
-1:18I	1	0	51	16	0	0	2	0	0	0	0	0
1:50I	0	20	7	40	0	2	0	1	0	0	0	0
-3:12D	0	11	2	46	0	4	7	0	0	0	0	0
-7:20D	0	0	0	56	0	4	10	0	0	0	0	0
4:1D	2	19	1	43	0	0	0	0	0	0	3	0
-15:20D	0	36	29	0	0	3	0	0	0	0	0	0
-6:14D	0	35	31	0	0	0	1	0	0	1	0	0
1:26I	0	22	30	1	0	2	6	0	0	0	7	0
1:45I	0	0	0	61	0	0	0	6	0	1	0	0
-3:2I	1	19	38	2	0	0	2	0	0	0	5	0
6:6I	0	0	0	67	0	0	0	0	0	0	0	0
-1:11I	0	44	21	0	0	0	1	0	0	0	0	0
-6:17D	0	55	0	0	0	8	0	1	0	0	2	0
1:60I	0	0	57	0	0	0	1	8	0	0	0	0
-16:31D	0	0	28	31	0	4	2	0	0	0	0	1
-3:26D	0	56	0	0	0	0	2	0	0	6	0	0
-15:8I	0	0	60	0	0	0	0	0	0	0	0	4
-6:23I	0	0	0	54	1	0	3	6	0	0	0	0
2:4D	0	22	39	1	0	0	0	0	0	0	0	0
-1:15I	0	0	56	0	0	0	0	0	0	6	0	0
-5:7D	0	0	0	51	0	2	3	5	0	0	0	0
-9:16D	0	41	0	1	0	11	5	0	0	2	0	0
-5:6D	0	15	1	34	0	2	2	1	0	0	0	5
1:43I	0	0	35	0	0	0	6	13	0	0	0	6
-2:4D	0	53	0	0	2	2	0	0	0	0	0	2
1:68I	0	0	26	30	0	0	3	0	0	0	0	0
-5:11D	1	0	22	32	0	0	0	3	0	0	0	0
-7:17D	0	55	0	1	0	0	2	0	0	0	0	0
-25:35D	0	22	0	33	0	0	0	1	0	0	0	0
-14:17D	0	53	0	0	0	0	0	3	0	0	0	0
-21:24D	0	15	15	15	0	3	0	0	0	2	0	6
-3:6D	0	15	2	37	0	0	2	0	0	0	0	0
1:20D	0	31	23	0	0	0	1	0	0	0	0	0
-1:5D	0	21	30	0	0	0	0	0	0	1	0	3
-1:13I	0	13	0	31	0	0	2	9	0	0	0	0
-8:1D,-3:8D	0	52	1	0	0	0	0	2	0	0	0	0
-1:29I	0	13	1	39	0	0	0	0	0	0	1	0
-3:8D	0	27	22	0	0	0	0	0	0	5	0	0
1:34D	0	46	0	0	1	1	0	5	0	1	0	0
1:71I	0	0	18	32	0	0	3	1	0	0	0	0
-5:1D	3	20	27	1	0	0	1	0	0	0	0	0
-4:13D	0	19	32	0	0	1	0	0	0	0	0	0
-11:21D	0	23	24	0	0	0	4	0	0	1	0	0
-1:39I	0	0	52	0	0	0	0	0	0	0	0	0
4:11D	0	0	50	0	0	0	0	0	0	0	0	2
-6:5D,2:22D	0	0	52	0	0	0	0	0	0	0	0	0
-14:15D	0	11	0	40	0	0	0	0	0	0	0	0
-1:45I	0	19	30	1	0	0	0	0	0	0	0	0
-15:15D	0	9	0	38	0	2	0	0	0	0	0	0
1:54I	0	1	2	34	0	5	0	6	0	0	0	1
-5:10D	0	0	1	35	0	0	0	0	0	6	7	0
-3:9I,4:12I,5:7D	0	0	0	49	0	0	0	0	0	0	0	0
-6:4I	1	0	47	0	0	0	0	0	0	0	0	0
-13:22D	0	0	28	20	0	0	0	0	0	0	0	0
1:49I	0	0	5	28	0	0	6	0	0	0	9	0
-12:43D	0	32	0	15	0	0	0	0	0	0	0	0
-14:23D	0	0	47	0	0	0	0	0	0	0	0	0
-2:2I	0	0	45	1	0	0	0	1	0	0	0	0
-4:10D	0	34	10	0	0	0	0	0	0	2	0	0
-4:5D	0	38	1	3	3	0	0	0	0	1	0	0
4:36I	0	0	0	46	0	0	0	0	0	0	0	0
-20:26D	0	11	30	0	0	0	0	0	0	2	2	0
1:42I	0	0	15	1	0	0	10	9	0	0	8	2
-2:5I,-1:2D	0	0	0	39	0	6	0	0	0	0	0	0
-2:19I	0	0	0	42	0	0	0	0	0	0	3	0
-4:1I	0	0	0	32	0	0	6	4	0	3	0	0
-8:1D,-1:9I,3:13I	0	19	15	0	0	0	0	10	0	0	0	0
1:69I	0	0	44	0	0	0	0	0	0	0	0	0
-12:16D	0	0	14	24	0	0	2	0	0	4	0	0
-11:18D	0	0	1	43	0	0	0	0	0	0	0	0
-1:2I,5:8D	0	0	0	44	0	0	0	0	0	0	0	0
1:53I	0	0	0	27	0	0	12	0	0	2	0	3
-14:26D	0	20	18	0	0	2	0	0	0	3	0	0
-11:1D,-2:36D	0	0	43	0	0	0	0	0	0	0	0	0
-8:1D,1:4D	0	0	0	43	0	0	0	0	0	0	0	0
-6:17I,-1:2I	1	0	0	41	0	0	0	0	0	0	0	0
-5:8D	0	31	1	0	0	1	0	5	0	4	0	0
-7:18D	0	23	0	0	0	5	8	0	0	6	0	0
-1:70I	0	0	36	5	0	0	0	1	0	0	0	0
2:10D	0	0	35	0	0	0	2	0	0	2	0	3
-1:60I	0	19	12	0	0	0	6	1	0	3	0	0
-8:14D	0	1	0	35	0	0	0	0	0	1	0	4
-7:16D	0	0	36	0	0	0	5	0	0	0	0	0
-1:49I	0	0	0	38	0	0	3	0	0	0	0	0
-9:17D	0	10	0	30	0	0	0	0	0	0	0	0
-15:18D	0	14	26	0	0	0	0	0	0	0	0	0
1:14D	0	26	1	0	0	3	4	6	0	0	0	0
-7:3D	0	0	1	39	0	0	0	0	0	0	0	0
-4:20D	0	0	6	34	0	0	0	0	0	0	0	0
-11:32D	0	0	0	40	0	0	0	0	0	0	0	0
1:63I	0	14	0	16	0	0	0	0	0	1	6	2
-7:29D	0	0	0	39	0	0	0	0	0	0	0	0
1:61I	0	11	26	0	0	0	0	0	0	0	1	0
-20:35D	0	38	0	0	0	0	0	0	0	0	0	0
1:41I	0	29	0	0	0	0	0	0	0	1	0	8
-10:4D,2:10I	0	0	38	0	0	0	0	0	0	0	0	0
-13:35D	0	0	36	0	0	0	0	0	0	2	0	0
-7:13D	0	0	0	38	0	0	0	0	0	0	0	0
-13:27D	0	17	18	0	0	0	0	0	0	0	0	2
-8:21D	0	31	0	0	0	6	0	0	0	0	0	0
1:21D	0	1	33	0	0	0	3	0	0	0	0	0
-4:41D	0	0	37	0	0	0	0	0	0	0	0	0
-1:1I,4:4D	0	0	37	0	0	0	0	0	0	0	0	0
-10:1I,-8:7D	0	0	37	0	0	0	0	0	0	0	0	0
-10:13D	0	0	30	0	0	0	4	0	0	1	0	2
1:78I	0	20	16	0	0	0	0	0	0	0	0	0
-1:56I	0	9	27	0	0	0	0	0	0	0	0	0
-16:33D	0	16	19	0	0	0	0	0	0	1	0	0
-6:13D	0	21	0	0	0	3	0	8	0	0	3	1
-4:26D	0	1	35	0	0	0	0	0	0	0	0	0
1:2I,4:8D	0	0	36	0	0	0	0	0	0	0	0	0
1:25I	0	0	21	0	0	0	4	10	0	0	1	0
-8:24D	0	0	0	36	0	0	0	0	0	0	0	0
-3:3I	0	14	21	0	0	0	0	0	0	0	0	0
4:5I	0	0	34	0	0	0	1	0	0	0	0	0
-12:28I	0	0	34	0	0	0	0	0	0	0	0	1
-1:21I	0	0	20	1	0	0	1	0	0	0	13	0
-5:36D	0	31	0	0	0	0	0	0	0	0	0	3
-2:8I	0	16	18	0	0	0	0	0	0	0	0	0
-1:26I	0	23	1	0	0	0	0	3	0	0	7	0
-1:80I	0	3	1	30	0	0	0	0	0	0	0	0
-36:43D	0	0	34	0	0	0	0	0	0	0	0	0
1:35D	0	0	34	0	0	0	0	0	0	0	0	0
-5:44D	0	0	26	0	0	3	5	0	0	0	0	0
-1:46I	0	0	34	0	0	0	0	0	0	0	0	0
-1:1D,6:21I	0	0	34	0	0	0	0	0	0	0	0	0
2:7D	0	0	34	0	0	0	0	0	0	0	0	0
-1:47I	0	0	13	0	0	0	1	16	0	0	1	3
-3:6I	0	0	1	33	0	0	0	0	0	0	0	0
-9:19D	0	0	0	32	0	0	0	0	0	2	0	0
4:5I,6:30I	0	0	0	34	0	0	0	0	0	0	0	0
-10:1I	1	0	0	31	0	0	1	0	0	0	0	0
-16:7I,-3:3D	0	17	16	0	0	0	0	0	0	0	0	0
-16:18D	0	17	12	0	0	0	0	4	0	0	0	0
-2:21D	0	31	0	0	0	0	0	0	0	0	2	0
-1:1I,4:1I	0	30	0	0	0	0	0	0	0	3	0	0
-11:19D	0	26	0	0	0	0	2	3	0	2	0	0
-6:18D	0	26	0	1	0	0	0	0	0	0	0	6
-4:4I	0	14	19	0	0	0	0	0	0	0	0	0
-8:22D	0	1	32	0	0	0	0	0	0	0	0	0
1:75I	0	0	30	1	0	0	1	1	0	0	0	0
1:16D	0	0	32	0	0	0	0	0	0	0	0	1
-8:2D,-1:11I	0	0	33	0	0	0	0	0	0	0	0	0
-9:35D	0	0	1	29	0	0	3	0	0	0	0	0
-11:22D	0	28	0	0	0	0	0	0	0	0	4	0
-1:43I	0	21	0	0	0	0	0	11	0	0	0	0
-6:16D	0	24	0	0	0	0	3	0	0	0	5	0
1:74I	0	0	24	5	0	0	3	0	0	0	0	0
1:11I,5:1D	0	0	32	0	0	0	0	0	0	0	0	0
-3:30I,1:17I	0	0	0	32	0	0	0	0	0	0	0	0
-5:13I	0	0	0	32	0	0	0	0	0	0	0	0
-12:29D	1	30	0	0	0	0	0	0	0	0	0	0
-7:15D	0	29	0	0	0	0	2	0	0	0	0	0
-6:2I	0	2	29	0	0	0	0	0	0	0	0	0
-5:5I,-3:4D	0	0	31	0	0	0	0	0	0	0	0	0
2:18D	0	0	31	0	0	0	0	0	0	0	0	0
-5:13D	0	0	25	0	0	2	0	4	0	0	0	0
-2:20D	0	0	26	0	0	0	5	0	0	0	0	0
-28:31D	0	0	31	0	0	0	0	0	0	0	0	0
-6:11D	0	0	31	0	0	0	0	0	0	0	0	0
-10:10D	0	0	20	0	0	6	5	0	0	0	0	0
4:7D	0	0	31	0	0	0	0	0	0	0	0	0
-21:14D	0	0	0	31	0	0	0	0	0	0	0	0
-6:2D	5	5	5	5	0	1	0	7	0	0	0	2
-12:1D	3	8	14	1	0	0	1	0	0	0	0	3
-4:3D,1:5I	0	30	0	0	0	0	0	0	0	0	0	0
-14:7I,-6:7D	0	30	0	0	0	0	0	0	0	0	0	0
-4:49I	0	0	30	0	0	0	0	0	0	0	0	0
-16:27D	0	0	30	0	0	0	0	0	0	0	0	0
-4:15D	0	0	27	0	0	0	1	2	0	0	0	0
-29:32D	0	0	0	28	0	0	2	0	0	0	0	0
-15:8I,-10:7D,1:2I	0	29	0	0	0	0	0	0	0	0	0	0
-7:54D	0	29	0	0	0	0	0	0	0	0	0	0
-13:20D	0	11	0	11	0	0	7	0	0	0	0	0
-4:9D	0	27	0	0	0	0	2	0	0	0	0	0
-2:39I	0	6	1	22	0	0	0	0	0	0	0	0
-35:35D	0	0	29	0	0	0	0	0	0	0	0	0
1:27D	0	0	27	0	0	0	2	0	0	0	0	0
-1:1I,4:17D	0	0	29	0	0	0	0	0	0	0	0	0
-12:12I	0	0	0	29	0	0	0	0	0	0	0	0
-1:1D,3:4I	0	0	0	29	0	0	0	0	0	0	0	0
-5:23D	0	26	0	0	0	0	0	0	0	2	0	0
-4:2I	0	22	0	0	0	6	0	0	0	0	0	0
-4:13I	0	1	27	0	0	0	0	0	0	0	0	0
-10:3D,-5:10I	0	0	28	0	0	0	0	0	0	0	0	0
-7:5D	0	0	20	0	0	4	0	0	0	4	0	0
-10:1I,-6:9I,-4:7D	0	0	28	0	0	0	0	0	0	0	0	0
-1:28D	0	0	0	28	0	0	0	0	0	0	0	0
-3:4I,1:7I	0	0	0	28	0	0	0	0	0	0	0	0
4:9I	1	26	0	0	0	0	0	0	0	0	0	0
-11:30D	0	26	1	0	0	0	0	0	0	0	0	0
1:25D	0	26	0	1	0	0	0	0	0	0	0	0
-15:28D	0	5	18	0	0	1	3	0	0	0	0	0
-6:8I	0	0	27	0	0	0	0	0	0	0	0	0
1:10I,5:3I	0	0	27	0	0	0	0	0	0	0	0	0
-11:2D,-6:4I,-3:1D,1:8I	0	0	27	0	0	0	0	0	0	0	0	0
-5:3I	0	0	24	0	0	0	3	0	0	0	0	0
-13:30D	0	0	25	0	0	0	1	0	0	1	0	0
-14:2I	0	0	27	0	0	0	0	0	0	0	0	0
-4:3D,1:1I	0	0	0	26	0	0	1	0	0	0	0	0
-2:32I,3:2I	0	0	0	27	0	0	0	0	0	0	0	0
-1:9D	0	0	0	25	0	2	0	0	0	0	0	0
-10:4D,-1:6I	0	0	0	27	0	0	0	0	0	0	0	0
-2:3I	1	20	0	1	0	4	0	0	0	0	0	0
-10:4I,-3:3D	0	26	0	0	0	0	0	0	0	0	0	0
-9:13I,-7:3I,-1:15I	0	26	0	0	0	0	0	0	0	0	0	0
-3:14I	0	26	0	0	0	0	0	0	0	0	0	0
-9:14D	0	16	0	1	0	3	2	4	0	0	0	0
1:13I,4:4I	0	26	0	0	0	0	0	0	0	0	0	0
-16:10D	0	25	0	1	0	0	0	0	0	0	0	0
1:9I,4:1I	0	26	0	0	0	0	0	0	0	0	0	0
-37:39D	0	26	0	0	0	0	0	0	0	0	0	0
1:73I	0	9	17	0	0	0	0	0	0	0	0	0
-8:10D	0	23	1	0	0	0	2	0	0	0	0	0
-6:37D	0	26	0	0	0	0	0	0	0	0	0	0
1:52D	0	26	0	0	0	0	0	0	0	0	0	0
-3:34D	0	20	0	0	0	0	0	0	0	0	6	0
-5:8I	0	1	25	0	0	0	0	0	0	0	0	0
-13:8I	0	0	26	0	0	0	0	0	0	0	0	0
-1:23I	0	0	26	0	0	0	0	0	0	0	0	0
-8:5D,3:1D	1	24	0	0	0	0	0	0	0	0	0	0
-6:5I	0	25	0	0	0	0	0	0	0	0	0	0
1:11D	0	18	0	0	0	3	0	0	0	4	0	0
-11:20D	0	13	0	0	0	0	4	4	0	0	4	0
1:3I,6:3D	0	25	0	0	0	0	0	0	0	0	0	0
-21:34D	0	0	25	0	0	0	0	0	0	0	0	0
-11:19I,3:4I,5:1D	0	0	25	0	0	0	0	0	0	0	0	0
-10:3I	0	0	22	0	0	0	0	3	0	0	0	0
-7:2I,-5:6D	0	0	25	0	0	0	0	0	0	0	0	0
-12:1I,-10:3D	0	0	25	0	0	0	0	0	0	0	0	0
-11:5I	0	0	25	0	0	0	0	0	0	0	0	0
-3:7I	0	0	25	0	0	0	0	0	0	0	0	0
-21:11D	0	0	25	0	0	0	0	0	0	0	0	0
-1:1I,5:1D	0	0	11	1	0	10	0	3	0	0	0	0
-19:5D	0	0	25	0	0	0	0	0	0	0	0	0
-2:1I,-1:2D	0	0	0	0	0	0	5	1	0	5	14	0
1:19D	0	23	0	0	0	0	1	0	0	0	0	0
-18:32D	0	24	0	0	0	0	0	0	0	0	0	0
-1:33I	0	23	0	1	0	0	0	0	0	0	0	0
-2:29I	0	23	0	1	0	0	0	0	0	0	0	0
1:80I	0	13	11	0	0	0	0	0	0	0	0	0
-1:1D,4:2I	0	1	0	23	0	0	0	0	0	0	0	0
5:3D	0	1	23	0	0	0	0	0	0	0	0	0
-1:61I	0	1	0	13	0	0	6	4	0	0	0	0
1:1I,2:5D	0	0	24	0	0	0	0	0	0	0	0	0
-2:35I	0	0	24	0	0	0	0	0	0	0	0	0
-1:19D	0	0	19	0	0	0	1	0	0	4	0	0
-5:7I	0	0	24	0	0	0	0	0	0	0	0	0
1:3I,4:9I,6:9I	0	0	24	0	0	0	0	0	0	0	0	0
-1:13D	0	0	24	0	0	0	0	0	0	0	0	0
-7:25D	0	0	0	17	0	3	4	0	0	0	0	0
-13:45D	0	0	0	24	0	0	0	0	0	0	0	0
-16:15D	0	23	0	0	0	0	0	0	0	0	0	0
-27:26D	0	18	0	0	0	4	0	0	0	1	0	0
-8:1D,2:4D	0	23	0	0	0	0	0	0	0	0	0	0
-1:41D	0	0	23	0	0	0	0	0	0	0	0	0
-8:1I,-3:2D	0	0	22	0	0	0	1	0	0	0	0	0
-1:30D	0	0	23	0	0	0	0	0	0	0	0	0
-28:28D	0	0	20	0	0	0	3	0	0	0	0	0
-13:12D	0	0	16	0	0	4	0	0	0	3	0	0
-8:2I,-3:3D	0	0	23	0	0	0	0	0	0	0	0	0
-5:7D,6:6I	0	21	1	0	0	0	0	0	0	0	0	0
-20:25D	0	22	0	0	0	0	0	0	0	0	0	0
-5:45D	0	22	0	0	0	0	0	0	0	0	0	0
-6:31I	0	22	0	0	0	0	0	0	0	0	0	0
-8:1D,1:6D	0	22	0	0	0	0	0	0	0	0	0	0
1:4D,6:6I	0	22	0	0	0	0	0	0	0	0	0	0
-11:31D	0	22	0	0	0	0	0	0	0	0	0	0
-27:46D	0	22	0	0	0	0	0	0	0	0	0	0
-10:11D	0	19	0	0	0	3	0	0	0	0	0	0
-3:1I	0	4	9	4	0	0	0	1	0	0	4	0
-1:55I	0	2	20	0	0	0	0	0	0	0	0	0
-17:11D	0	0	22	0	0	0	0	0	0	0	0	0
-2:10I	0	0	21	0	0	0	0	0	0	1	0	0
-1:6I,4:1I	0	0	22	0	0	0	0	0	0	0	0	0
-20:22D	0	0	22	0	0	0	0	0	0	0	0	0
-1:25I,3:1I	0	0	22	0	0	0	0	0	0	0	0	0
-12:7I,-10:2D	0	0	22	0	0	0	0	0	0	0	0	0
1:18I,4:5I,5:3D	0	0	22	0	0	0	0	0	0	0	0	0
4:7I	0	0	22	0	0	0	0	0	0	0	0	0
6:9I	0	21	0	0	0	0	0	0	0	0	0	0
-20:41D	0	21	0	0	0	0	0	0	0	0	0	0
-5:31D	0	18	0	0	0	0	1	0	0	2	0	0
4:44I	0	19	0	0	0	0	2	0	0	0	0	0
2:6I	0	19	0	0	0	2	0	0	0	0	0	0
1:18D	0	18	2	0	0	0	1	0	0	0	0	0
-1:41I	0	0	17	0	0	0	0	4	0	0	0	0
-6:38D	0	0	21	0	0	0	0	0	0	0	0	0
-15:9I	0	0	18	0	0	0	2	1	0	0	0	0
-12:13D	0	0	21	0	0	0	0	0	0	0	0	0
-15:14D	0	0	20	0	0	1	0	0	0	0	0	0
-16:7I	0	0	21	0	0	0	0	0	0	0	0	0
-6:7I	0	0	20	0	0	0	1	0	0	0	0	0
-15:24D	0	0	21	0	0	0	0	0	0	0	0	0
-7:8D	0	0	20	0	0	1	0	0	0	0	0	0
-10:1D,-3:3D	0	0	21	0	0	0	0	0	0	0	0	0
-31:45D	0	20	0	0	0	0	0	0	0	0	0	0
2:5I	0	18	0	0	0	0	2	0	0	0	0	0
-2:17I,1:5I	0	20	0	0	0	0	0	0	0	0	0	0
-18:18D	0	15	0	0	0	3	2	0	0	0	0	0
-2:17I	0	20	0	0	0	0	0	0	0	0	0	0
-1:37I	0	19	1	0	0	0	0	0	0	0	0	0
-6:20I,2:19I	0	20	0	0	0	0	0	0	0	0	0	0
-13:19D	0	20	0	0	0	0	0	0	0	0	0	0
-15:16D	0	20	0	0	0	0	0	0	0	0	0	0
-1:20I	0	0	20	0	0	0	0	0	0	0	0	0
-5:8I,1:7I	0	0	20	0	0	0	0	0	0	0	0	0
-13:3I	0	0	20	0	0	0	0	0	0	0	0	0
1:4I,3:5I	0	0	20	0	0	0	0	0	0	0	0	0
4:15I	0	0	19	1	0	0	0	0	0	0	0	0
-18:29D	0	0	18	0	0	0	2	0	0	0	0	0
-15:45D	0	0	20	0	0	0	0	0	0	0	0	0
-16:2D,-3:3D	0	0	20	0	0	0	0	0	0	0	0	0
-1:34I	0	0	20	0	0	0	0	0	0	0	0	0
1:51D	0	0	0	20	0	0	0	0	0	0	0	0
-23:38D	1	18	0	0	0	0	0	0	0	0	0	0
-4:18I,-1:1I	0	19	0	0	0	0	0	0	0	0	0	0
1:70I	0	5	14	0	0	0	0	0	0	0	0	0
-22:21D	0	19	0	0	0	0	0	0	0	0	0	0
-8:1I,-1:10I,5:2I	0	19	0	0	0	0	0	0	0	0	0	0
-27:39D	0	15	0	0	0	0	4	0	0	0	0	0
-8:1D,-1:15I,2:8I	0	19	0	0	0	0	0	0	0	0	0	0
-2:15I	0	19	0	0	0	0	0	0	0	0	0	0
-6:9I,-3:9I	0	19	0	0	0	0	0	0	0	0	0	0
-12:9D	0	0	13	0	0	0	0	0	0	6	0	0
-7:3D,-1:1D	0	0	0	19	0	0	0	0	0	0	0	0
-3:1D,1:2I	0	0	0	19	0	0	0	0	0	0	0	0
3:1D	3	1	6	1	0	7	0	0	0	0	0	0
-3:22I,-1:5I	1	17	0	0	0	0	0	0	0	0	0	0
-1:1D,5:1D	1	14	1	1	0	1	0	0	0	0	0	0
-4:6D	0	18	0	0	0	0	0	0	0	0	0	0
-8:2D,-1:2I	0	18	0	0	0	0	0	0	0	0	0	0
-8:1D,-3:3D	0	12	3	0	0	0	1	1	0	1	0	0
-6:9I,1:6I	0	18	0	0	0	0	0	0	0	0	0	0
-5:11I,-3:1D	0	18	0	0	0	0	0	0	0	0	0	0
2:2I	0	18	0	0	0	0	0	0	0	0	0	0
-1:28I	0	1	1	0	0	7	4	0	0	0	5	0
3:6I	0	0	17	0	0	0	0	0	0	0	0	1
-8:1I,-2:6D	0	0	18	0	0	0	0	0	0	0	0	0
1:30I,5:1D	0	0	18	0	0	0	0	0	0	0	0	0
1:67I	0	0	12	4	0	0	0	2	0	0	0	0
-1:30I	0	0	1	17	0	0	0	0	0	0	0	0
-4:1D	1	1	3	2	0	3	0	0	0	0	7	0
-22:44D	0	16	1	0	0	0	0	0	0	0	0	0
-17:14D	0	17	0	0	0	0	0	0	0	0	0	0
-20:10D,-2:3I	0	17	0	0	0	0	0	0	0	0	0	0
-12:11D,4:1I	0	17	0	0	0	0	0	0	0	0	0	0
-26:44D	0	17	0	0	0	0	0	0	0	0	0	0
-8:1D,-3:13D	0	17	0	0	0	0	0	0	0	0	0	0
-20:31D	0	17	0	0	0	0	0	0	0	0	0	0
-2:7I	0	16	1	0	0	0	0	0	0	0	0	0
-13:4I,-6:8D	0	17	0	0	0	0	0	0	0	0	0	0
-25:24D	0	0	17	0	0	0	0	0	0	0	0	0
-15:5I	0	0	17	0	0	0	0	0	0	0	0	0
-16:29I,-10:7I,-3:2D	0	0	17	0	0	0	0	0	0	0	0	0
4:3I	0	0	14	0	0	0	3	0	0	0	0	0
-14:12D	0	16	0	0	0	0	0	0	0	0	0	0
-3:2D,2:4I	0	16	0	0	0	0	0	0	0	0	0	0
-3:2I,-1:7I,1:5D	0	16	0	0	0	0	0	0	0	0	0	0
-3:8I,-1:1I	0	16	0	0	0	0	0	0	0	0	0	0
-15:9D	0	10	0	0	0	0	0	0	0	6	0	0
-13:15D	0	16	0	0	0	0	0	0	0	0	0	0
-24:36D	0	16	0	0	0	0	0	0	0	0	0	0
-2:5I,3:1D	0	16	0	0	0	0	0	0	0	0	0	0
-15:31D	0	5	0	0	0	6	3	0	0	0	2	0
-19:48D	0	0	16	0	0	0	0	0	0	0	0	0
-29:29D	0	0	16	0	0	0	0	0	0	0	0	0
-8:5I	0	0	16	0	0	0	0	0	0	0	0	0
-8:1I,-2:1D	0	0	16	0	0	0	0	0	0	0	0	0
2:19I	0	0	16	0	0	0	0	0	0	0	0	0
-28:16D	0	0	16	0	0	0	0	0	0	0	0	0
-9:7D	0	15	0	0	0	0	0	0	0	0	0	0
-13:25D	0	15	0	0	0	0	0	0	0	0	0	0
-13:14D	0	15	0	0	0	0	0	0	0	0	0	0
1:17I,2:1D	0	15	0	0	0	0	0	0	0	0	0	0
-7:1I,-1:2I	0	15	0	0	0	0	0	0	0	0	0	0
-4:1I,-3:3D	0	15	0	0	0	0	0	0	0	0	0	0
-1:82I	0	1	14	0	0	0	0	0	0	0	0	0
-3:4I,1:18I	0	0	15	0	0	0	0	0	0	0	0	0
1:2I,4:15I	0	0	15	0	0	0	0	0	0	0	0	0
-3:12I	0	0	15	0	0	0	0	0	0	0	0	0
-2:43I	0	0	15	0	0	0	0	0	0	0	0	0
-3:4D,5:1D	0	0	15	0	0	0	0	0	0	0	0	0
-30:30D	0	0	15	0	0	0	0	0	0	0	0	0
-6:3I,-3:1D	0	14	0	0	0	0	0	0	0	0	0	0
-23:39D	0	14	0	0	0	0	0	0	0	0	0	0
-3:15D	0	14	0	0	0	0	0	0	0	0	0	0
-22:22D	0	14	0	0	0	0	0	0	0	0	0	0
-8:1D,-3:1D	0	14	0	0	0	0	0	0	0	0	0	0
-2:6I	0	1	9	0	0	0	4	0	0	0	0	0
-7:10I,-3:9I,4:1I	0	14	0	0	0	0	0	0	0	0	0	0
1:35I,3:5I	0	14	0	0	0	0	0	0	0	0	0	0
-10:4I	0	0	13	0	0	0	1	0	0	0	0	0
-27:31D	0	0	14	0	0	0	0	0	0	0	0	0
-15:1I,-4:3I	0	0	14	0	0	0	0	0	0	0	0	0
-8:1D,-1:2I,1:5D	0	0	14	0	0	0	0	0	0	0	0	0
-15:19D	1	0	12	0	0	0	0	0	0	0	0	0
-2:7I,1:7I	0	13	0	0	0	0	0	0	0	0	0	0
-4:63I,2:4I	0	13	0	0	0	0	0	0	0	0	0	0
-20:32D	0	11	0	0	0	0	0	0	0	0	2	0
1:81I	0	0	11	1	0	0	0	0	0	0	1	0
1:11I,4:1I,5:7D	0	0	13	0	0	0	0	0	0	0	0	0
2:53I	0	0	13	0	0	0	0	0	0	0	0	0
-13:7I	0	0	13	0	0	0	0	0	0	0	0	0
-34:35D	0	0	0	13	0	0	0	0	0	0	0	0
1:52I	0	0	0	0	0	0	1	0	0	0	12	0
3:8I	0	0	0	0	0	0	5	8	0	0	0	0
-15:1D	4	2	2	1	0	0	2	0	1	0	0	0
-3:1D,2:11I	0	12	0	0	0	0	0	0	0	0	0	0
-8:5D,1:6I	0	12	0	0	0	0	0	0	0	0	0	0
2:33I	0	12	0	0	0	0	0	0	0	0	0	0
1:7I,4:4I	0	12	0	0	0	0	0	0	0	0	0	0
-7:12I,-4:7D	0	12	0	0	0	0	0	0	0	0	0	0
-7:9D	0	8	0	0	0	0	0	4	0	0	0	0
-1:27I	0	1	11	0	0	0	0	0	0	0	0	0
1:79I	0	0	9	0	0	0	3	0	0	0	0	0
-42:42D	0	0	12	0	0	0	0	0	0	0	0	0
-3:37I,1:9I	0	0	12	0	0	0	0	0	0	0	0	0
-4:7I	0	0	8	0	0	0	0	0	0	4	0	0
-20:30D	0	0	7	0	0	5	0	0	0	0	0	0
-3:36D	0	0	0	12	0	0	0	0	0	0	0	0
-6:21D	0	0	0	12	0	0	0	0	0	0	0	0
-25:31D	0	0	0	0	0	5	0	5	0	2	0	0
-1:31I	0	0	0	0	0	10	2	0	0	0	0	0
-23:13D,1:35I	0	0	0	0	0	0	0	0	0	12	0	0
1:6I,4:1I	0	11	0	0	0	0	0	0	0	0	0	0
1:6I,3:1I	0	11	0	0	0	0	0	0	0	0	0	0
-15:1I,-8:8D	0	11	0	0	0	0	0	0	0	0	0	0
-2:25I,1:23I	0	0	11	0	0	0	0	0	0	0	0	0
-7:8D,3:6I,5:1D	0	0	11	0	0	0	0	0	0	0	0	0
-11:5D	0	0	11	0	0	0	0	0	0	0	0	0
1:6I,6:24I	0	0	11	0	0	0	0	0	0	0	0	0
-16:7D	0	0	11	0	0	0	0	0	0	0	0	0
-11:8D,1:1I	0	0	11	0	0	0	0	0	0	0	0	0
2:14I	0	10	0	0	0	0	0	0	0	0	0	0
2:8D	0	1	0	0	0	4	5	0	0	0	0	0
-1:24I	0	0	3	0	0	4	0	0	0	3	0	0
-9:10D	0	0	0	0	0	6	0	4	0	0	0	0
-6:29I	0	0	0	0	0	0	10	0	0	0	0	0
-1:44I,2:26I	0	0	0	0	0	0	10	0	0	0	0	0
1:56I	0	0	0	0	0	0	2	7	0	1	0	0
-24:24D	0	0	0	0	0	0	7	0	0	0	0	3
5:4D	1	0	1	1	0	0	5	0	0	1	0	0
-2:57I,3:10I	0	9	0	0	0	0	0	0	0	0	0	0
-9:1D	0	1	0	1	0	0	0	0	0	0	7	0
-18:4D,-12:7D	0	9	0	0	0	0	0	0	0	0	0	0
-1:68I	0	8	1	0	0	0	0	0	0	0	0	0
-4:5I	0	9	0	0	0	0	0	0	0	0	0	0
-8:1D,-1:5I	0	0	9	0	0	0	0	0	0	0	0	0
-10:50D	0	0	9	0	0	0	0	0	0	0	0	0
-5:16D	0	0	0	0	0	7	1	0	0	1	0	0
1:46I	0	0	0	0	0	0	7	0	0	0	0	2
-1:31D	0	0	0	0	0	0	5	0	0	4	0	0
-1:19I	0	0	0	0	0	0	0	3	0	0	0	6
-1:12I	0	0	0	0	0	0	0	0	0	0	9	0
-3:3I,1:55I	0	0	0	0	0	0	0	0	0	0	9	0
5:1I	2	3	3	0	0	0	0	0	0	0	0	0
-16:20D	0	8	0	0	0	0	0	0	0	0	0	0
-8:7I,-1:2I	0	8	0	0	0	0	0	0	0	0	0	0
3:2D	0	1	1	2	0	3	0	0	0	1	0	0
2:54I	0	0	8	0	0	0	0	0	0	0	0	0
-12:10D	0	0	3	0	0	5	0	0	0	0	0	0
-4:41I	0	0	0	8	0	0	0	0	0	0	0	0
-11:10D	0	0	0	0	0	5	1	0	0	1	1	0
-2:12I,1:23I	0	0	0	0	0	0	8	0	0	0	0	0
-1:53I	0	0	0	0	0	0	8	0	0	0	0	0
-2:58I	0	0	0	0	0	0	8	0	0	0	0	0
-37:37D	0	0	0	0	0	0	0	8	0	0	0	0
1:12I,3:4I	0	0	0	0	0	0	0	8	0	0	0	0
-15:1I	0	0	0	0	0	0	0	5	0	0	3	0
-8:1D,1:7I,2:3D	0	0	0	0	0	0	0	0	0	0	8	0
1:3I,3:1D	0	0	0	0	0	0	0	0	0	0	0	8
4:1I	1	2	1	1	0	0	1	1	0	0	0	0
-3:9I	1	0	0	0	0	0	6	0	0	0	0	0
-14:1D,-3:3D	0	4	0	2	0	0	1	0	0	0	0	0
-8:3D	0	3	2	2	0	0	0	0	0	0	0	0
-1:78I	0	5	0	0	0	0	2	0	0	0	0	0
-6:12D	0	7	0	0	0	0	0	0	0	0	0	0
-8:19I,-3:6D	0	7	0	0	0	0	0	0	0	0	0	0
-1:14I	0	0	1	0	0	0	6	0	0	0	0	0
1:22I,3:1I,6:3I	0	0	7	0	0	0	0	0	0	0	0	0
-1:12I,4:8I	0	0	7	0	0	0	0	0	0	0	0	0
1:65I	0	0	1	0	0	0	0	5	0	1	0	0
-4:30I,1:34I	0	0	7	0	0	0	0	0	0	0	0	0
6:27I	0	0	0	0	7	0	0	0	0	0	0	0
-5:29D	0	0	0	0	0	7	0	0	0	0	0	0
-2:19D	0	0	0	0	0	7	0	0	0	0	0	0
1:13I,4:6I	0	0	0	0	0	7	0	0	0	0	0	0
-25:23D	0	0	0	0	0	6	0	0	0	0	0	1
-12:21D	0	0	0	0	0	5	2	0	0	0	0	0
-1:25I	0	0	0	0	0	1	6	0	0	0	0	0
-2:5I	0	0	0	0	0	0	5	0	0	1	0	1
-1:5I,4:10I	0	0	0	0	0	0	0	7	0	0	0	0
-2:33I,1:23I	0	0	0	0	0	0	0	7	0	0	0	0
-13:8D	0	0	0	0	0	0	0	0	0	0	7	0
-15:4I,-10:11D	0	0	0	0	0	0	0	0	0	0	7	0
-10:7D,-1:1I	0	0	0	0	0	0	0	0	0	0	7	0
3:20I	0	0	0	0	0	0	0	0	0	0	7	0
-16:3D	1	0	0	0	0	0	0	5	0	0	0	0
-10:1D	1	1	2	0	0	0	2	0	0	0	0	0
2:13I,4:3I	0	6	0	0	0	0	0	0	0	0	0	0
-8:18I,-3:6D	0	6	0	0	0	0	0	0	0	0	0	0
2:5D	0	1	0	0	0	0	0	0	0	0	0	5
1:58I	0	1	3	1	0	0	1	0	0	0	0	0
-8:1I	0	1	2	1	0	0	2	0	0	0	0	0
1:7I,5:1D	0	0	1	0	0	0	5	0	0	0	0	0
-1:38I	0	0	2	0	0	4	0	0	0	0	0	0
-1:10I,4:7I	0	0	6	0	0	0	0	0	0	0	0	0
1:83I	0	0	0	0	0	6	0	0	0	0	0	0
-12:26D	0	0	0	0	0	6	0	0	0	0	0	0
-1:1D,4:1D	0	0	0	0	0	6	0	0	0	0	0	0
-23:8D,-3:3D	0	0	0	0	0	6	0	0	0	0	0	0
-3:4I	0	0	0	0	0	3	3	0	0	0	0	0
-12:25D	0	0	0	0	0	4	0	0	0	2	0	0
1:7I,2:11D	0	0	0	0	0	6	0	0	0	0	0	0
1:6I,2:3D	0	0	0	0	0	0	3	0	0	3	0	0
-9:9I	0	0	0	0	0	0	6	0	0	0	0	0
1:5I,5:1I	0	0	0	0	0	0	6	0	0	0	0	0
-1:4D,5:5I	0	0	0	0	0	0	6	0	0	0	0	0
-2:48I,2:3I	0	0	0	0	0	0	0	6	0	0	0	0
1:1I,6:2I	0	0	0	0	0	0	0	0	0	6	0	0
-8:2D,-1:4I	0	0	0	0	0	0	0	0	0	6	0	0
1:10I,5:21I	0	0	0	0	0	0	0	0	0	6	0	0
-8:18D	0	0	0	0	0	0	0	0	0	3	0	3
-34:32D	0	0	0	0	0	0	0	0	0	0	6	0
-19:6D,-3:3D	0	0	0	0	0	0	0	0	0	0	0	6
2:9D	1	0	0	0	0	0	3	0	0	1	0	0
4:3D	1	2	1	1	0	0	0	0	0	0	0	0
-10:1D,-4:4D	0	5	0	0	0	0	0	0	0	0	0	0
-31:33D	0	5	0	0	0	0	0	0	0	0	0	0
-8:20I,-3:6D	0	5	0	0	0	0	0	0	0	0	0	0
1:32I,4:1I,6:2I	0	5	0	0	0	0	0	0	0	0	0	0
-2:34I	0	0	1	0	0	0	2	0	0	2	0	0
-1:4D,5:1I	0	0	1	0	0	0	4	0	0	0	0	0
-16:11I	0	0	1	0	0	0	0	0	0	0	0	4
-4:21D	0	0	0	1	0	0	0	4	0	0	0	0
-13:16D	0	0	0	0	1	0	3	0	0	1	0	0
-1:29I,4:1I	0	0	0	0	0	5	0	0	0	0	0	0
-9:48D	0	0	0	0	0	4	1	0	0	0	0	0
-24:42D	0	0	0	0	0	5	0	0	0	0	0	0
-9:36I,4:1D	0	0	0	0	0	5	0	0	0	0	0	0
-3:23D	0	0	0	0	0	5	0	0	0	0	0	0
-2:43D	0	0	0	0	0	0	5	0	0	0	0	0
-5:39D	0	0	0	0	0	0	5	0	0	0	0	0
-6:1I,-3:3D	0	0	0	0	0	0	5	0	0	0	0	0
-31:17D	0	0	0	0	0	0	5	0	0	0	0	0
-8:6D	0	0	0	0	0	0	5	0	0	0	0	0
-2:35D	0	0	0	0	0	0	1	4	0	0	0	0
-3:28I	0	0	0	0	0	0	5	0	0	0	0	0
2:13D	0	0	0	0	0	0	5	0	0	0	0	0
-12:40D	0	0	0	0	0	0	5	0	0	0	0	0
-7:5I,-4:4D	0	0	0	0	0	0	2	0	0	3	0	0
-15:6I	0	0	0	0	0	0	0	5	0	0	0	0
-1:54I	0	0	0	0	0	0	0	5	0	0	0	0
-18:2D,-15:4I,-10:3I	0	0	0	0	0	0	0	5	0	0	0	0
-18:4D,-7:2I	0	0	0	0	0	0	0	5	0	0	0	0
-2:51D	0	0	0	0	0	0	0	5	0	0	0	0
-4:14D	0	0	0	0	0	0	0	0	0	2	3	0
-3:2D,3:12I,4:8D	0	0	0	0	0	0	0	0	0	5	0	0
-8:19D	0	0	0	0	0	0	0	0	0	5	0	0
-2:17I,1:23I	0	0	0	0	0	0	0	0	0	0	0	5
-1:36I	1	0	0	0	0	0	0	3	0	0	0	0
-10:3D	0	2	0	2	0	0	0	0	0	0	0	0
4:4I	0	1	2	1	0	0	0	0	0	0	0	0
-4:15I,-3:6D	0	4	0	0	0	0	0	0	0	0	0	0
3:12I	0	1	0	0	0	0	0	0	0	3	0	0
-8:17D	0	1	0	0	0	0	0	3	0	0	0	0
-8:17I,-3:6D	0	4	0	0	0	0	0	0	0	0	0	0
1:4D,6:1I	0	1	0	0	0	0	0	0	0	3	0	0
5:2D	0	1	0	1	0	0	0	0	0	0	0	2
-5:1I	0	1	0	0	0	0	3	0	0	0	0	0
1:72I	0	0	1	1	0	2	0	0	0	0	0	0
[truncated: 412 more rows]

## Sheet: mESC_Pcsk9
Sample	I.NT	I.RNP.unco..65.mer	I.RNPD.coup..65.mer	II.NT	II.RNP.unco..65.mer	II.RNPD.coup..65.mer	III.NT	III.RNP.unco..65.mer	III.RNPD.coup..65.mer
no variant	95148	108723	117436	132512	129089	123309	134907	114567	91026
Corrected: SNV:-1G,1C	0	139	469	0	268	790	0	207	788
SNV:-11C	63	158	75	50	161	86	93	57	63
SNV:-4T	77	81	72	66	118	74	92	78	69
SNV:4G	55	129	41	30	112	50	60	39	55
SNV:4A	48	145	35	30	133	40	56	27	33
SNV:-13T	45	77	46	34	109	59	74	45	45
SNV:-9G	36	128	34	25	114	25	48	28	30
SNV:-4A	41	28	31	42	44	34	46	37	29
SNV:4C	34	33	29	30	38	47	39	42	29
SNV:5A	20	62	30	29	65	22	36	20	21
SNV:2G	25	64	22	17	68	23	45	13	16
SNV:-5T	22	27	33	34	44	23	24	35	16
SNV:-14C	16	34	24	29	26	28	32	35	26
SNV:-6G	17	59	12	10	86	17	18	8	10
SNV:2C	25	40	12	18	40	28	31	25	18
SNV:-2G	24	17	28	24	24	25	26	24	19
SNV:-5G	13	46	12	15	47	19	26	12	21
SNV:-15A	21	39	20	12	41	16	19	14	12
SNV:-17A	13	30	14	22	31	16	18	24	10
SNV:3A	14	32	17	15	28	17	22	14	9
SNV:-16T	18	16	18	18	23	16	20	17	10
SNV:-9T	14	29	9	11	38	4	10	16	19
SNV:-2T	13	23	18	15	20	17	17	16	10
SNV:-6T	13	17	12	15	30	13	23	14	11
SNV:-3T	13	19	14	17	21	15	16	13	13
SNV:1G	15	12	18	12	20	16	17	17	8
SNV:-15T	12	24	18	11	18	20	17	3	12
SNV:-13A	10	13	12	15	19	16	23	11	12
SNV:-1G	10	10	16	7	17	22	11	18	19
SNV:-12G	8	12	11	19	18	12	13	22	11
SNV:1C	6	13	10	4	19	31	4	12	25
SNV:-1T	10	9	19	10	12	20	19	11	9
SNV:6A	9	10	9	15	19	21	12	11	12
SNV:5T	10	18	8	9	25	13	15	10	7
SNV:-10A	14	7	9	24	18	12	10	8	10
SNV:1T	4	11	5	6	21	21	15	15	9
SNV:6T	7	16	13	9	25	8	12	10	7
SNV:-17T	6	11	13	13	17	15	16	6	5
SNV:-16A	8	10	10	15	16	12	11	9	7
SNV:-6A	6	12	5	7	17	13	14	6	8
SNV:-16C	3	21	5	9	22	9	10	2	6
SNV:-7A	8	9	8	9	11	8	13	13	7
SNV:-5A	2	9	7	12	14	5	13	11	10
SNV:-8T	7	13	4	10	13	12	12	4	6
SNV:-8A	9	9	11	9	13	9	7	5	9
SNV:-1A	3	12	10	10	17	5	6	9	9
SNV:-3A	2	10	10	9	15	15	10	4	5
SNV:-11C,2G	4	30	1	2	25	2	8	0	7
SNV:-10T	5	12	4	7	21	5	13	5	4
SNV:-12T	9	5	7	6	10	9	12	11	3
SNV:-9C	8	19	4	4	19	6	6	2	4
SNV:2A	8	7	8	4	16	5	8	6	7
SNV:-11C,4G	6	18	1	3	20	3	8	3	5
SNV:5C	2	14	8	5	13	5	4	4	7
SNV:-15G	5	7	4	1	17	6	11	4	5
SNV:-7C	8	20	2	3	14	2	2	6	1
SNV:-4C	5	8	4	10	12	3	5	3	3
SNV:-13C	4	12	0	6	15	3	5	1	5
SNV:-11C,4A	3	17	1	0	18	2	3	2	3
SNV:-2C	4	7	5	8	7	5	5	6	1
SNV:-2T,-1G	2	3	0	4	19	1	3	12	4
SNV:3T	3	6	0	9	9	4	10	4	3
SNV:-14G	7	14	4	1	6	6	6	1	2
SNV:6C	2	6	6	3	9	7	4	7	1
SNV:-7T	4	5	3	3	7	7	6	3	4
SNV:-11A	2	5	5	9	7	3	1	6	2
SNV:-10C	5	11	2	0	9	1	3	3	3
SNV:-8C	2	14	3	1	8	2	4	3	0
SNV:-11G	4	6	4	1	8	1	3	1	7
SNV:-14A	2	3	4	6	3	3	6	2	4
SNV:3C	1	9	2	1	6	6	4	0	0
SNV:-6G,-4T	2	3	4	1	9	2	1	1	3
SNV:-6G,4A	0	12	0	0	10	0	2	1	0
SNV:-3G	2	6	0	5	5	1	2	2	1
SNV:-16C,-11C	0	5	0	0	8	4	3	1	2
SNV:-17C	0	3	3	4	4	3	3	2	1
SNV:-15A,-4T	3	4	1	3	3	1	3	1	3
SNV:-13T,4G	4	3	2	2	2	2	4	0	1
SNV:-13T,-5G	2	6	1	1	6	1	2	0	0
SNV:4A,5A	0	9	0	0	1	2	2	1	0
SNV:-4T,4A	0	2	2	0	6	0	3	1	1
SNV:-9G,2G	1	2	1	1	3	1	2	1	2
SNV:-5G,4G	0	4	0	0	4	1	1	2	2
SNV:-9G,4A	1	8	1	0	3	0	0	0	0
SNV:-12C	0	2	1	1	4	1	1	3	0
SNV:-9G,5A	0	8	0	0	4	0	1	0	0
SNV:-15A,4A	0	3	0	2	4	0	3	0	1
SNV:2G,4G	1	4	0	1	3	0	1	0	2
SNV:3A,4G	0	4	0	1	5	2	0	0	0
SNV:-15G,-9G	1	6	0	1	2	0	1	0	0
SNV:-4A,-1G,1C	0	0	0	0	8	0	0	0	3
SNV:-16C,2G	2	3	2	0	3	0	0	0	0
SNV:-11C,-4T	1	1	0	1	4	2	0	0	0
SNV:-11C,-9G	1	2	0	0	4	1	1	0	0
SNV:-16C,-11C,2G	1	4	2	0	1	1	0	0	0
SNV:-11C,-7C	2	3	0	1	1	1	0	1	0
SNV:-15A,-6G	0	3	0	0	5	0	0	1	0
SNV:-13T,-11C	0	1	1	1	3	1	1	0	1
SNV:-11C,-5G	0	2	0	0	4	0	2	0	1
SNV:-8T,-6A,-5T,-3A,-2T,-1G	0	0	0	0	0	9	0	0	0
SNV:-16C,4G	1	3	0	0	1	0	1	1	1
SNV:-11C,3C	1	4	0	0	2	0	0	1	0
SNV:-11C,2G,4G	1	3	1	0	2	0	0	1	0
SNV:-13T,2G	0	4	0	0	1	0	0	1	2
SNV:-17T,-4T	0	1	0	1	3	1	1	0	1
SNV:-1T,1G,4C	0	0	0	0	0	8	0	0	0
SNV:-9T,-2T	1	1	1	0	2	1	0	1	0
SNV:-17A,-5G	0	4	0	0	1	0	0	2	0
SNV:-17A,-16C	0	5	0	0	2	0	0	0	0
SNV:-9G,3C	0	2	0	0	4	1	0	0	0
SNV:-16T,5T	0	3	1	0	0	1	0	2	0
SNV:-16T,-11C	1	0	1	0	0	0	3	0	1
SNV:2G,3A	1	4	0	0	1	0	0	0	0
SNV:-15A,5A	1	1	0	0	3	1	0	0	0
SNV:-11C,-3T	0	3	0	0	0	1	2	0	0
SNV:-16T,-9G	0	1	0	0	5	0	0	0	0
SNV:4C,5C	0	3	0	1	1	0	0	0	1
SNV:-11C,-10C	0	5	0	0	1	0	0	0	0
SNV:-11C,1T	0	2	0	0	2	0	1	0	1
SNV:2G,3C	0	1	0	0	3	1	0	1	0
SNV:-2T,4G	0	1	0	0	1	1	0	2	1
SNV:-16C,-13T	0	0	0	1	2	0	2	0	1
SNV:-13T,3A	0	0	0	0	3	0	2	1	0
SNV:-1G,1C,2G,4A	0	0	0	0	0	5	0	0	1
SNV:1C,3T,4C,5C	0	0	0	0	0	0	0	5	1
SNV:-2T,4A	1	1	0	0	1	0	0	1	1
SNV:-5G,2C	1	2	0	0	2	0	0	0	0
SNV:-9G,-8C	0	4	0	0	1	0	0	0	0
SNV:-2T,-1G,4C	0	2	1	0	0	0	0	2	0
SNV:-6G,-3A	0	1	0	0	3	0	0	1	0
SNV:-16T,-13T	0	1	1	1	1	0	1	0	0
SNV:-5G,3A	0	3	0	0	1	0	1	0	0
SNV:-13T,-5G,3A	0	1	0	0	4	0	0	0	0
SNV:-15A,-4T,4A	0	3	0	0	2	0	0	0	0
SNV:-5G,1T	0	3	0	0	1	1	0	0	0
SNV:-10T,-9G	0	2	0	0	2	0	1	0	0
SNV:2G,4A	0	2	0	0	1	1	1	0	0
SNV:-16C,-11C,4G	0	0	1	0	3	0	1	0	0
SNV:-9T,-1G	0	0	2	0	1	0	0	1	1
SNV:-13T,-4T	0	0	0	2	1	1	1	0	0
SNV:-2G,-1G	0	0	0	0	5	0	0	0	0
SNV:-2T,4C	0	0	0	0	1	0	1	1	2
SNV:2C,5C	0	0	0	0	1	0	1	0	3
SNV:-9G,-7C	0	0	0	0	3	1	0	0	1
SNV:-16T,4A	1	0	0	0	2	1	0	0	0
SNV:-9C,2C	1	1	2	0	0	0	0	0	0
SNV:-6A,6T	1	0	0	0	2	0	0	1	0
SNV:-1G,4C	1	0	0	0	1	1	1	0	0
SNV:-15G,4A	1	0	0	0	2	0	1	0	0
SNV:-1G,4A	1	1	0	0	0	1	0	1	0
SNV:-5G,-4C	1	1	0	0	0	0	2	0	0
SNV:-11C,5A	1	2	0	0	1	0	0	0	0
SNV:3C,5A	0	1	0	0	3	0	0	0	0
SNV:-17T,-13T	0	2	0	0	1	1	0	0	0
SNV:-13T,5T	0	1	0	2	0	0	0	0	1
SNV:-17A,-5G,4G	0	3	0	0	1	0	0	0	0
SNV:-5T,2A	0	1	0	0	2	0	0	0	1
SNV:4G,5T	0	3	0	0	0	1	0	0	0
SNV:-13T,-9G	0	1	0	0	2	0	0	1	0
SNV:-9T,2C	0	1	1	2	0	0	0	0	0
SNV:-5G,-1A	0	1	0	1	2	0	0	0	0
SNV:-3T,2G	0	1	1	0	1	0	0	1	0
SNV:-11C,3A	0	2	0	0	2	0	0	0	0
SNV:-4T,-3A	0	1	0	0	3	0	0	0	0
SNV:-9T,-6T	0	0	1	0	2	0	0	1	0
SNV:-14G,4G	0	0	1	0	1	0	0	2	0
SNV:-17A,-11C	0	0	1	0	2	0	0	0	1
SNV:-13T,-1A	0	0	0	1	3	0	0	0	0
SNV:-1T,6T	0	0	0	2	0	1	1	0	0
SNV:-5G,2G	0	0	0	0	1	0	1	2	0
SNV:-13C,-5G	0	0	0	0	4	0	0	0	0
SNV:-7T,4G	0	0	0	0	2	0	1	0	1
SNV:-11C,1T,2G	0	0	0	0	3	0	0	0	1
SNV:-17A,3A	0	0	0	0	2	0	1	0	1
SNV:-14G,-11C	0	0	0	0	0	1	3	0	0
SNV:-9G,4G	0	0	0	0	0	2	2	0	0
SNV:-5A,-4T,-3T,-2C	0	0	0	0	0	4	0	0	0
SNV:-1G,3C	1	0	0	0	2	0	0	0	0
SNV:4C,6T	1	1	1	0	0	0	0	0	0
SNV:-9T,-5A	1	1	0	0	1	0	0	0	0
SNV:-16C,-4T	1	0	0	0	2	0	0	0	0
SNV:1C,5C	1	0	0	0	0	0	0	1	1
SNV:-11C,-9C	1	0	0	0	0	1	0	1	0
SNV:-12T,-6T	1	0	0	0	1	0	1	0	0
SNV:-3T,5A	1	0	0	0	0	0	2	0	0
SNV:-16C,-10C	1	2	0	0	0	0	0	0	0
SNV:-11C,-3T,2G	1	0	0	0	1	0	1	0	0
SNV:-13A,-9T	1	0	0	1	0	1	0	0	0
SNV:-7C,5A	0	3	0	0	0	0	0	0	0
SNV:-13T,-8C	0	1	0	0	1	0	1	0	0
SNV:-6G,5A	0	2	0	1	0	0	0	0	0
SNV:-8C,4A	0	2	0	0	1	0	0	0	0
SNV:-15A,-6G,-4T	0	2	0	0	0	1	0	0	0
SNV:3T,4G	0	2	1	0	0	0	0	0	0
SNV:-11C,3C,4A	0	1	0	0	2	0	0	0	0
SNV:-13T,4C	0	1	0	0	2	0	0	0	0
SNV:-15A,4A,5A	0	1	0	0	2	0	0	0	0
SNV:-13A,-9G	0	2	0	0	1	0	0	0	0
SNV:-1A,4G	0	2	0	0	1	0	0	0	0
SNV:-13C,-5G,4G	0	2	0	0	1	0	0	0	0
SNV:1T,4G	0	2	0	0	0	0	1	0	0
SNV:-5G,-2T	0	1	0	0	0	2	0	0	0
SNV:-4T,1T	0	2	0	0	1	0	0	0	0
SNV:-15G,-8C	0	1	0	0	1	0	1	0	0
SNV:-10A,-7C	0	2	0	0	1	0	0	0	0
SNV:-9C,1C	0	1	0	0	1	1	0	0	0
SNV:-7C,-2C	0	1	0	0	1	0	0	1	0
SNV:-6G,5T	0	1	0	0	1	1	0	0	0
SNV:-8C,4C	0	1	0	0	1	0	0	1	0
SNV:-15T,-9T	0	1	1	0	0	0	0	1	0
SNV:-7C,-6G	0	1	0	0	2	0	0	0	0
SNV:-4T,4G	0	1	0	0	0	0	0	1	1
SNV:-17C,-11C	0	1	0	0	1	1	0	0	0
SNV:-6A,2A	0	1	0	0	2	0	0	0	0
SNV:-11C,-8C	0	1	0	0	1	0	0	0	1
SNV:-15G,-10T	0	0	1	0	1	1	0	0	0
SNV:-11C,-10T	0	0	1	0	1	0	1	0	0
SNV:-2C,-1G	0	0	1	0	1	1	0	0	0
SNV:-9G,5C	0	0	0	1	2	0	0	0	0
SNV:-9C,-4T	0	0	0	1	1	0	0	0	1
SNV:-5T,2C	0	0	0	1	0	1	1	0	0
SNV:-2T,-1G,4A	0	0	0	1	0	1	1	0	0
SNV:-9G,5T	0	0	0	1	2	0	0	0	0
SNV:4C,6C	0	0	0	1	0	1	0	1	0
SNV:2C,3C,4C,5T	0	0	0	0	3	0	0	0	0
SNV:-4T,5A	0	0	0	0	3	0	0	0	0
SNV:-5G,3A,4G	0	0	0	0	3	0	0	0	0
SNV:-9T,-2T,-1G	0	0	0	0	2	1	0	0	0
SNV:-17A,-13C	0	0	0	0	3	0	0	0	0
SNV:-1G,2G,3A	0	0	0	0	3	0	0	0	0
SNV:-15G,-5T	0	0	0	0	2	0	1	0	0
SNV:-11C,2G,4A	0	0	0	0	3	0	0	0	0
SNV:-17A,4G	0	0	0	0	3	0	0	0	0
SNV:-1A,4A	0	0	0	0	1	1	0	1	0
SNV:-11C,4A,5A	0	0	0	0	2	0	1	0	0
SNV:-1G,1C,4C	0	0	0	0	0	2	0	0	1
SNV:-5G,-1G	0	0	0	0	0	1	1	0	1
SNV:-15G,-9G,-5T	0	0	0	0	0	0	1	0	2
SNV:-11G,4G	0	0	0	0	0	0	2	1	0
SNV:3C,4A,5T,6A	0	0	0	0	0	0	0	3	0
SNV:-1G,1G,2G,5T	0	0	0	0	0	0	0	0	3
SNV:-4T,3A	1	0	0	0	0	0	1	0	0
SNV:-15T,-13A	1	0	0	0	0	0	0	0	1
SNV:-11C,-7C,4A	1	0	0	0	0	1	0	0	0
SNV:-9G,2G,4A	1	1	0	0	0	0	0	0	0
SNV:-3T,4A	1	0	0	0	0	0	1	0	0
SNV:-6A,4A	1	0	1	0	0	0	0	0	0
SNV:1C,5T	1	0	0	0	1	0	0	0	0
SNV:-13T,-2T	1	0	0	0	0	0	1	0	0
SNV:-11C,4C	1	0	1	0	0	0	0	0	0
SNV:-14C,2C	1	0	0	0	1	0	0	0	0
SNV:-9G,-3T	1	0	0	0	0	1	0	0	0
SNV:-8C,6T	1	0	0	0	1	0	0	0	0
SNV:1C,3T	1	0	0	0	0	0	1	0	0
SNV:-11C,-4C	1	0	0	0	0	0	0	0	1
SNV:-9G,-5G	1	0	0	0	0	0	1	0	0
SNV:-14A,2C	1	0	0	0	0	0	1	0	0
SNV:-13T,-11C,2G	1	1	0	0	0	0	0	0	0
SNV:-9G,3C,5A	1	0	0	0	1	0	0	0	0
SNV:2C,3A	0	1	0	0	0	0	1	0	0
SNV:-4T,4A,5A	0	2	0	0	0	0	0	0	0
SNV:-6G,-1G,1C	0	1	0	0	0	0	0	0	1
SNV:-1A,1T	0	2	0	0	0	0	0	0	0
SNV:3T,4A,5T	0	1	0	0	0	0	1	0	0
SNV:2C,6C	0	1	0	0	0	0	0	0	1
SNV:-12G,-4C	0	1	0	0	0	0	0	0	1
SNV:-4T,-3A,4G	0	1	0	0	0	0	1	0	0
SNV:-11C,-9G,2G,4A	0	2	0	0	0	0	0	0	0
SNV:-10C,4G	0	2	0	0	0	0	0	0	0
SNV:-13A,4A	0	1	0	0	0	0	0	1	0
SNV:-15A,-7C,-4T,4A,5A	0	1	0	0	0	0	1	0	0
SNV:-8C,3C	0	2	0	0	0	0	0	0	0
SNV:-14G,-4T,4G	0	1	0	0	1	0	0	0	0
SNV:-11C,-2C	0	1	0	0	0	1	0	0	0
SNV:-13T,-1G	0	2	0	0	0	0	0	0	0
SNV:-6A,2C	0	1	0	0	0	1	0	0	0
SNV:-10T,5A	0	1	0	0	1	0	0	0	0
SNV:-17T,4A	0	1	0	0	0	0	0	0	1
SNV:-5T,4A	0	2	0	0	0	0	0	0	0
SNV:-8C,2G	0	1	0	0	1	0	0	0	0
SNV:-13T,-9T	0	1	0	0	0	0	0	1	0
SNV:-16C,-2C	0	2	0	0	0	0	0	0	0
SNV:-9G,-1G,1C	0	1	0	0	1	0	0	0	0
SNV:-13C,4G	0	1	0	0	1	0	0	0	0
SNV:-13T,-9C	0	1	0	0	0	0	1	0	0
SNV:-9T,2G	0	1	0	0	0	0	1	0	0
SNV:3T,5T	0	1	0	0	0	1	0	0	0
SNV:-11C,-6G	0	1	0	1	0	0	0	0	0
SNV:-9C,3C	0	1	0	0	0	1	0	0	0
SNV:-13C,-10C	0	2	0	0	0	0	0	0	0
SNV:-13C,-11C,2G	0	2	0	0	0	0	0	0	0
SNV:-9T,5C	0	1	0	0	0	0	1	0	0
SNV:-2C,1C	0	1	0	0	0	0	1	0	0
SNV:-17T,-5G	0	1	0	0	0	0	0	0	1
SNV:-15A,-4T,-3A	0	1	1	0	0	0	0	0	0
SNV:-13T,6C	0	1	0	0	0	1	0	0	0
SNV:-4T,5T	0	1	0	0	0	0	0	0	1
SNV:-11C,1G,2G	0	1	0	1	0	0	0	0	0
SNV:1C,2A,4G	0	1	0	0	0	0	0	0	1
SNV:-3G,2A	0	1	0	0	0	0	0	0	1
SNV:-17A,-7T	0	1	0	0	1	0	0	0	0
SNV:3T,4C,5C	0	1	0	0	0	0	0	1	0
SNV:-11C,-5G,2G	0	1	0	0	0	1	0	0	0
SNV:-3G,-1A	0	1	0	0	0	1	0	0	0
SNV:-9T,-8T,-6G	0	1	0	0	0	1	0	0	0
SNV:-9C,4C	0	1	0	0	1	0	0	0	0
SNV:1T,2G	0	2	0	0	0	0	0	0	0
SNV:-6A,5T	0	1	0	0	0	1	0	0	0
SNV:-7C,-4T	0	2	0	0	0	0	0	0	0
SNV:-2T,-1G,4G	0	1	0	1	0	0	0	0	0
SNV:3C,4A	0	1	0	0	0	0	0	0	1
SNV:-11C,-4C,4A	0	1	0	0	1	0	0	0	0
SNV:-13C,3A	0	2	0	0	0	0	0	0	0
SNV:2C,3T,4G	0	1	0	0	0	0	0	0	1
SNV:4A,6T	0	2	0	0	0	0	0	0	0
SNV:-6G,-5G	0	1	0	0	0	0	1	0	0
SNV:-8A,4G	0	1	0	0	0	0	0	1	0
SNV:-13C,2G	0	1	0	0	1	0	0	0	0
SNV:-6T,5C	0	1	0	0	1	0	0	0	0
SNV:-11C,-8C,2G	0	1	0	0	0	1	0	0	0
SNV:2A,3C	0	1	0	0	0	0	0	0	1
SNV:-16C,-13C,-11C	0	1	0	0	1	0	0	0	0
SNV:-3T,4G	0	1	0	0	1	0	0	0	0
SNV:-13C,-11C	0	1	0	0	0	0	1	0	0
SNV:-17C,-13T	0	0	1	0	0	0	0	1	0
SNV:-13T,-1G,1C	0	0	1	0	1	0	0	0	0
SNV:-13T,4A	0	0	1	0	1	0	0	0	0
SNV:2C,3T,4A	0	0	1	0	0	0	1	0	0
SNV:-7C,4A	0	0	1	0	1	0	0	0	0
SNV:-6T,-4T	0	0	1	0	1	0	0	0	0
SNV:-15A,-14G	0	0	1	0	1	0	0	0	0
SNV:-6A,5C	0	0	1	0	0	0	1	0	0
SNV:-16T,-8T	0	0	1	0	0	0	0	1	0
SNV:-11C,2C	0	0	1	0	0	0	0	0	1
SNV:4C,5T	0	0	1	0	1	0	0	0	0
SNV:-15A,5T	0	0	2	0	0	0	0	0	0
SNV:4C,5A	0	0	1	0	0	1	0	0	0
SNV:-2C,2G	0	0	1	0	0	1	0	0	0
SNV:-17A,-10C	0	0	1	0	1	0	0	0	0
SNV:-5T,2G	0	0	1	0	0	1	0	0	0
SNV:1C,4C,5T	0	0	0	1	0	0	1	0	0
SNV:-15T,-13A,-9T	0	0	0	1	0	0	1	0	0
SNV:-4T,-3T	0	0	0	1	0	0	1	0	0
SNV:-5T,-3T	0	0	0	1	1	0	0	0	0
SNV:-1A,2C,3C	0	0	0	0	2	0	0	0	0
SNV:-3A,4C	0	0	0	0	1	1	0	0	0
SNV:-6G,4G	0	0	0	0	1	0	0	0	1
SNV:3C,6C	0	0	0	0	1	1	0	0	0
SNV:-12G,-9T	0	0	0	0	1	0	0	0	1
SNV:-12G,-6G	0	0	0	0	1	0	1	0	0
SNV:1C,4C	0	0	0	0	1	1	0	0	0
SNV:-16T,-3T	0	0	0	0	1	0	0	1	0
SNV:1C,4C,5C	0	0	0	0	1	0	0	0	1
SNV:-13T,-3T	0	0	0	0	2	0	0	0	0
SNV:-5G,2G,4G	0	0	0	0	1	0	0	1	0
SNV:-15A,-13T	0	0	0	0	2	0	0	0	0
SNV:-11C,2G,3C	0	0	0	0	2	0	0	0	0
SNV:-11C,-7C,-4T	0	0	0	0	2	0	0	0	0
SNV:-15G,4G	0	0	0	0	2	0	0	0	0
SNV:-10T,-9G,-8C	0	0	0	0	2	0	0	0	0
SNV:-14G,-1G,1C	0	0	0	0	2	0	0	0	0
SNV:-16C,-11C,2G,4G	0	0	0	0	2	0	0	0	0
SNV:-6G,6T	0	0	0	0	2	0	0	0	0
SNV:-16C,3T	0	0	0	0	2	0	0	0	0
SNV:2A,4C	0	0	0	0	1	0	1	0	0
SNV:-11C,-4C,2G	0	0	0	0	1	0	1	0	0
SNV:-13T,-5G,4G	0	0	0	0	1	0	0	0	1
SNV:-14G,-5G	0	0	0	0	2	0	0	0	0
SNV:-11C,-7C,1T,4A,5A	0	0	0	0	2	0	0	0	0
SNV:-6A,-5T	0	0	0	0	2	0	0	0	0
SNV:-13A,-3A	0	0	0	0	1	0	1	0	0
SNV:-16C,-9G	0	0	0	0	2	0	0	0	0
SNV:-16T,3T	0	0	0	0	1	0	1	0	0
SNV:-4T,6T	0	0	0	0	1	1	0	0	0
SNV:-9C,-8T	0	0	0	0	1	0	1	0	0
SNV:-3A,5T	0	0	0	0	0	1	0	1	0
SNV:-16T,-5T	0	0	0	0	0	1	0	1	0
SNV:-4C,4G	0	0	0	0	0	1	0	0	1
SNV:-1G,1C,4A	0	0	0	0	0	1	0	0	1
SNV:-1G,1C,4G	0	0	0	0	0	2	0	0	0
SNV:-15G,-13A	0	0	0	0	0	2	0	0	0
SNV:-13T,1T	0	0	0	0	0	1	0	1	0
SNV:-14G,-5G,4G	0	0	0	0	0	1	1	0	0
SNV:-9G,-1G	0	0	0	0	0	1	0	1	0
SNV:-2C,2C,5C	0	0	0	0	0	1	0	1	0
SNV:1C,3T,4C	0	0	0	0	0	0	1	0	1
SNV:-1G,1C,3A	0	0	0	0	0	0	1	0	1
SNV:1T,2G,3A	0	0	0	0	0	0	0	2	0
SNV:-9C,2G	0	0	0	0	0	0	0	1	1
SNV:-1G,1G,4C	0	0	0	0	0	0	0	0	2
SNV:-1G,1C,6A	0	0	0	0	0	0	0	0	2
SNV:-4T,3C	1	0	0	0	0	0	0	0	0
SNV:-17C,-11C,2G,4G	1	0	0	0	0	0	0	0	0
SNV:-6G,-4T,-3T	1	0	0	0	0	0	0	0	0
SNV:-15A,-11C,5A	1	0	0	0	0	0	0	0	0
SNV:-14C,-5G	1	0	0	0	0	0	0	0	0
SNV:-7T,4A	1	0	0	0	0	0	0	0	0
SNV:-16T,-13C,-6A,2A,3T	1	0	0	0	0	0	0	0	0
SNV:-6A,5C,6T	1	0	0	0	0	0	0	0	0
SNV:-9T,1C,6C	1	0	0	0	0	0	0	0	0
SNV:-16T,-9T,-6T,4C	1	0	0	0	0	0	0	0	0
SNV:-15A,2A,5T	1	0	0	0	0	0	0	0	0
SNV:-9G,-3G,2C	1	0	0	0	0	0	0	0	0
SNV:-11C,-2C,6T	1	0	0	0	0	0	0	0	0
SNV:-13T,-4A,-2T,3T,6A	1	0	0	0	0	0	0	0	0
SNV:-14C,-12T,-2T	1	0	0	0	0	0	0	0	0
SNV:-15A,3T	1	0	0	0	0	0	0	0	0
SNV:5C,6T	1	0	0	0	0	0	0	0	0
SNV:-8T,2G	1	0	0	0	0	0	0	0	0
SNV:-8T,3T,5T	1	0	0	0	0	0	0	0	0
SNV:-9G,1G	1	0	0	0	0	0	0	0	0
SNV:-15G,-11C,4A,5A	1	0	0	0	0	0	0	0	0
SNV:-6G,-2C,2C,4C	1	0	0	0	0	0	0	0	0
SNV:-8A,-5T,4A,6C	1	0	0	0	0	0	0	0	0
SNV:-4C,4A	1	0	0	0	0	0	0	0	0
SNV:-11C,-2T,3A,4A	1	0	0	0	0	0	0	0	0
SNV:-13T,-10T,-1A	1	0	0	0	0	0	0	0	0
SNV:-16T,-13A,-9G	1	0	0	0	0	0	0	0	0
SNV:-17T,-3T	1	0	0	0	0	0	0	0	0
SNV:-17T,-16T,-4T	1	0	0	0	0	0	0	0	0
SNV:-14G,-10C,-5G,2G,4G	1	0	0	0	0	0	0	0	0
SNV:-13T,-5G,-4C	1	0	0	0	0	0	0	0	0
SNV:-10T,4A	1	0	0	0	0	0	0	0	0
SNV:-11C,-5G,3A	1	0	0	0	0	0	0	0	0
SNV:-5A,-3T	1	0	0	0	0	0	0	0	0
SNV:-8A,-1T	1	0	0	0	0	0	0	0	0
SNV:-1G,2C	1	0	0	0	0	0	0	0	0
SNV:-5T,2C,4A	1	0	0	0	0	0	0	0	0
SNV:-15A,-14G,-12G,-11C,-7C,-6G,-2C	1	0	0	0	0	0	0	0	0
SNV:-11G,-9T,-8T	1	0	0	0	0	0	0	0	0
SNV:-1A,2G	1	0	0	0	0	0	0	0	0
SNV:3T,5C	1	0	0	0	0	0	0	0	0
SNV:-14C,-12C,-9C	1	0	0	0	0	0	0	0	0
SNV:-11C,-4C,4G	1	0	0	0	0	0	0	0	0
SNV:-12T,-11C,2G	1	0	0	0	0	0	0	0	0
SNV:-5T,3T,5T,6C	1	0	0	0	0	0	0	0	0
SNV:-2G,1G,2G,3C	1	0	0	0	0	0	0	0	0
SNV:4G,5C	1	0	0	0	0	0	0	0	0
SNV:-13C,-9T	1	0	0	0	0	0	0	0	0
SNV:-13T,-7T,-5G,-2T	1	0	0	0	0	0	0	0	0
SNV:-11C,-7C,2G,4A	1	0	0	0	0	0	0	0	0
SNV:-16T,-5A,-1A	1	0	0	0	0	0	0	0	0
SNV:-11C,-10T,-4C,1T	1	0	0	0	0	0	0	0	0
SNV:-15A,-6A	1	0	0	0	0	0	0	0	0
SNV:1C,2C,3T,5C	1	0	0	0	0	0	0	0	0
SNV:-5G,6C	1	0	0	0	0	0	0	0	0
SNV:-13A,-7C,-2T,4A,5C	1	0	0	0	0	0	0	0	0
SNV:-16C,-11C,-2C	1	0	0	0	0	0	0	0	0
SNV:-17C,-10C,-2C,-1G,3T,4A	1	0	0	0	0	0	0	0	0
SNV:-13C,-2T	1	0	0	0	0	0	0	0	0
SNV:-14G,-10C,-2C,1T,4C,5A	1	0	0	0	0	0	0	0	0
SNV:-17A,-11C,3T	1	0	0	0	0	0	0	0	0
SNV:-8T,-3A	1	0	0	0	0	0	0	0	0
SNV:-10C,1T	1	0	0	0	0	0	0	0	0
SNV:-16T,-15G,-8T	1	0	0	0	0	0	0	0	0
SNV:-10T,-9C,-2T,-1G	1	0	0	0	0	0	0	0	0
SNV:-2T,4G,6T	1	0	0	0	0	0	0	0	0
SNV:-11C,-4C,2C	1	0	0	0	0	0	0	0	0
SNV:-17T,-15T,-14C,-13A	1	0	0	0	0	0	0	0	0
SNV:-15G,-11C,-7C,-3T,4A,5A	1	0	0	0	0	0	0	0	0
SNV:-9G,-8C,-7C,4A	1	0	0	0	0	0	0	0	0
SNV:-5G,-2T,1T,2G,3A	1	0	0	0	0	0	0	0	0
SNV:-17A,-5G,-4T,2G	1	0	0	0	0	0	0	0	0
SNV:-17A,-13C,-7T,-5G,-4T,-2C,1T,3A	1	0	0	0	0	0	0	0	0
SNV:-14C,3T,5C	1	0	0	0	0	0	0	0	0
SNV:2G,3T,4A	1	0	0	0	0	0	0	0	0
SNV:-14G,1G,4G	1	0	0	0	0	0	0	0	0
SNV:-15G,-2T	1	0	0	0	0	0	0	0	0
SNV:-9C,5T	1	0	0	0	0	0	0	0	0
SNV:-17T,-6T,-3A	0	1	0	0	0	0	0	0	0
SNV:-16T,-9C,3C,6C	0	1	0	0	0	0	0	0	0
SNV:-16T,-15T,-5T	0	1	0	0	0	0	0	0	0
SNV:1C,2A,4C	0	1	0	0	0	0	0	0	0
SNV:-17T,-6A,-5A,6T	0	1	0	0	0	0	0	0	0
SNV:-9C,-4A	0	1	0	0	0	0	0	0	0
SNV:-1G,1G	0	1	0	0	0	0	0	0	0
SNV:-3A,6C	0	1	0	0	0	0	0	0	0
SNV:-3T,4A,6A	0	1	0	0	0	0	0	0	0
SNV:-10T,-9T,-8T,-6A,6C	0	1	0	0	0	0	0	0	0
SNV:-14G,2G,4G	0	1	0	0	0	0	0	0	0
SNV:-16C,-13C,4G	0	1	0	0	0	0	0	0	0
SNV:-17T,-8C,3C	0	1	0	0	0	0	0	0	0
SNV:-9C,-8T,-6A,-1A	0	1	0	0	0	0	0	0	0
SNV:-16T,-15T,-8T,-4A,6C	0	1	0	0	0	0	0	0	0
SNV:-15G,-9G,-7C	0	1	0	0	0	0	0	0	0
SNV:-15G,-10T,-9G,-8C,5A	0	1	0	0	0	0	0	0	0
SNV:-16A,-15G,-10T,-9T,-5T,2G	0	1	0	0	0	0	0	0	0
SNV:-11A,-9G	0	1	0	0	0	0	0	0	0
SNV:-14G,-11G,-5G,-2C,4C	0	1	0	0	0	0	0	0	0
SNV:-16T,-15G,-9G	0	1	0	0	0	0	0	0	0
SNV:3A,5C,6T	0	1	0	0	0	0	0	0	0
SNV:-16C,-11C,2G,3C	0	1	0	0	0	0	0	0	0
SNV:-15T,-3T	0	1	0	0	0	0	0	0	0
SNV:-13T,-1A,4G	0	1	0	0	0	0	0	0	0
SNV:-4T,2A,6T	0	1	0	0	0	0	0	0	0
SNV:2C,3A,5T	0	1	0	0	0	0	0	0	0
SNV:2G,3T	0	1	0	0	0	0	0	0	0
SNV:-17T,6T	0	1	0	0	0	0	0	0	0
SNV:-11C,-9G,3C,5A	0	1	0	0	0	0	0	0	0
SNV:-11C,-9G,-7C	0	1	0	0	0	0	0	0	0
SNV:-16C,-13T,-11C,-10C	0	1	0	0	0	0	0	0	0
SNV:1G,4A	0	1	0	0	0	0	0	0	0
SNV:-16T,-15G,-7T,-6T	0	1	0	0	0	0	0	0	0
SNV:-17A,-1A,1T	0	1	0	0	0	0	0	0	0
SNV:-15A,-3A,4A,5A	0	1	0	0	0	0	0	0	0
SNV:-13T,-4T,4A	0	1	0	0	0	0	0	0	0
SNV:-14G,-13T	0	1	0	0	0	0	0	0	0
SNV:-9G,-1A,1G	0	1	0	0	0	0	0	0	0
SNV:-11C,6C	0	1	0	0	0	0	0	0	0
SNV:-17C,-16T,-13T,-7C,-1A,2G,3T	0	1	0	0	0	0	0	0	0
SNV:2G,3T,4G	0	1	0	0	0	0	0	0	0
SNV:3C,5C	0	1	0	0	0	0	0	0	0
SNV:-5A,2G	0	1	0	0	0	0	0	0	0
SNV:-17T,-5A,3T	0	1	0	0	0	0	0	0	0
SNV:-12G,-11C,-6T,1T	0	1	0	0	0	0	0	0	0
SNV:-11C,-2T,4G	0	1	0	0	0	0	0	0	0
SNV:-17A,-5G,-2T,-1G,3A	0	1	0	0	0	0	0	0	0
SNV:-7C,-3G,4C	0	1	0	0	0	0	0	0	0
SNV:-5G,-2T,1T	0	1	0	0	0	0	0	0	0
SNV:-7A,4C	0	1	0	0	0	0	0	0	0
SNV:-17T,-6G,-4T	0	1	0	0	0	0	0	0	0
SNV:-9C,5C	0	1	0	0	0	0	0	0	0
SNV:-17T,-10A	0	1	0	0	0	0	0	0	0
SNV:-17C,-16C,-13T,-5G	0	1	0	0	0	0	0	0	0
SNV:-13A,-5G	0	1	0	0	0	0	0	0	0
SNV:-17T,-13T,-12T,-7T,5T	0	1	0	0	0	0	0	0	0
SNV:-16C,-2C,4G	0	1	0	0	0	0	0	0	0
SNV:-13A,5A	0	1	0	0	0	0	0	0	0
SNV:-2G,-1A,1G,4G	0	1	0	0	0	0	0	0	0
SNV:-8T,6C	0	1	0	0	0	0	0	0	0
SNV:-9G,-6G,-2C	0	1	0	0	0	0	0	0	0
SNV:-4C,-2C,3T	0	1	0	0	0	0	0	0	0
SNV:-17A,-14G,-10C,2G,4G	0	1	0	0	0	0	0	0	0
SNV:-15G,-13T,-9G,-8C	0	1	0	0	0	0	0	0	0
SNV:-11C,-5G,4G	0	1	0	0	0	0	0	0	0
SNV:-13T,-4C,4G	0	1	0	0	0	0	0	0	0
SNV:-5G,3C	0	1	0	0	0	0	0	0	0
SNV:-13T,-10A	0	1	0	0	0	0	0	0	0
SNV:-4T,-3A,4A	0	1	0	0	0	0	0	0	0
SNV:-15A,-4T,-2T	0	1	0	0	0	0	0	0	0
SNV:-11C,3C,4G	0	1	0	0	0	0	0	0	0
SNV:-13T,-5G,3A,4G	0	1	0	0	0	0	0	0	0
SNV:-8C,-5T,-1A	0	1	0	0	0	0	0	0	0
SNV:3A,5C	0	1	0	0	0	0	0	0	0
SNV:-9G,1G,2G	0	1	0	0	0	0	0	0	0
SNV:-17T,-13C,-12T,3T	0	1	0	0	0	0	0	0	0
SNV:3A,6T	0	1	0	0	0	0	0	0	0
SNV:-15T,-6G,4C	0	1	0	0	0	0	0	0	0
SNV:-17A,-14G,-5G	0	1	0	0	0	0	0	0	0
SNV:-2C,-1G,5C	0	1	0	0	0	0	0	0	0
SNV:-16C,-11C,3C	0	1	0	0	0	0	0	0	0
SNV:-13T,1C	0	1	0	0	0	0	0	0	0
SNV:-13C,-10C,-3T,4G	0	1	0	0	0	0	0	0	0
SNV:-17C,3C,6T	0	1	0	0	0	0	0	0	0
SNV:-15A,-4T,-3G,-2C	0	1	0	0	0	0	0	0	0
SNV:-17C,-16C,-4C	0	1	0	0	0	0	0	0	0
SNV:-16C,-11C,-1G,2G,3C	0	1	0	0	0	0	0	0	0
SNV:-15A,-13A,-7C,-4T	0	1	0	0	0	0	0	0	0
SNV:-15A,-4T,-2C,5A	0	1	0	0	0	0	0	0	0
SNV:-16T,-9T	0	1	0	0	0	0	0	0	0
SNV:2A,4A	0	1	0	0	0	0	0	0	0
SNV:-13T,2A	0	1	0	0	0	0	0	0	0
SNV:-7C,-4C,4A	0	1	0	0	0	0	0	0	0
SNV:-11C,-5G,1T,3A,4G	0	1	0	0	0	0	0	0	0
SNV:-17C,-13T,-11C,-7C,-3T,-1G,4A,5A	0	1	0	0	0	0	0	0	0
SNV:-9C,6C	0	1	0	0	0	0	0	0	0
SNV:-9G,-1A	0	1	0	0	0	0	0	0	0
SNV:-5A,3T,4A	0	1	0	0	0	0	0	0	0
SNV:-15G,-7C,-4T,5A	0	1	0	0	0	0	0	0	0
SNV:-6G,2G	0	1	0	0	0	0	0	0	0
SNV:-10T,-5G,5C	0	1	0	0	0	0	0	0	0
SNV:-5G,-1A,4G	0	1	0	0	0	0	0	0	0
SNV:1G,2G	0	1	0	0	0	0	0	0	0
SNV:-9C,4A	0	1	0	0	0	0	0	0	0
SNV:-13T,-11C,-3T,1T,2G,4A	0	1	0	0	0	0	0	0	0
SNV:-12T,3C	0	1	0	0	0	0	0	0	0
SNV:-17C,-11C,-10T,-7C,-5T,1G,2G,4G	0	1	0	0	0	0	0	0	0
SNV:-17A,-11C,-4T,1T,2G,4G	0	1	0	0	0	0	0	0	0
SNV:-16T,-9G,-5T	0	1	0	0	0	0	0	0	0
SNV:-11C,-8C,1G,2G	0	1	0	0	0	0	0	0	0
SNV:-17A,-14G,4G	0	1	0	0	0	0	0	0	0
SNV:-13T,-8C,-7C,-1A,4A	0	1	0	0	0	0	0	0	0
SNV:-15G,-11C,2G	0	1	0	0	0	0	0	0	0
SNV:-17A,-11C,2G,4G	0	1	0	0	0	0	0	0	0
SNV:-10C,-5T	0	1	0	0	0	0	0	0	0
SNV:-17A,-13T,-5G	0	1	0	0	0	0	0	0	0
SNV:-10T,2G,3C	0	1	0	0	0	0	0	0	0
SNV:-10C,-8T,6T	0	1	0	0	0	0	0	0	0
SNV:-16T,-13C,-11C,-5T,3A,4A	0	1	0	0	0	0	0	0	0
SNV:-14C,-13A,-4T	0	1	0	0	0	0	0	0	0
SNV:-13C,-11C,-7T,2G,4G	0	1	0	0	0	0	0	0	0
SNV:-13T,-5G,-1G,1C	0	1	0	0	0	0	0	0	0
SNV:-9G,-7C,-6A,2C	0	1	0	0	0	0	0	0	0
SNV:-16C,-11C,2G,4A	0	1	0	0	0	0	0	0	0
SNV:-13A,-8T	0	1	0	0	0	0	0	0	0
SNV:-15A,2A,5C,6C	0	1	0	0	0	0	0	0	0
SNV:-16T,-13A,4A	0	1	0	0	0	0	0	0	0
SNV:-13T,-5G,-3T	0	1	0	0	0	0	0	0	0
SNV:-16C,-8C,4G	0	1	0	0	0	0	0	0	0
SNV:-11C,-1G,4G	0	1	0	0	0	0	0	0	0
SNV:-10A,4C	0	1	0	0	0	0	0	0	0
SNV:-11C,-4T,4A	0	1	0	0	0	0	0	0	0
SNV:-15T,4G,5T	0	1	0	0	0	0	0	0	0
SNV:-3A,5C	0	1	0	0	0	0	0	0	0
SNV:-4C,1G,2G	0	1	0	0	0	0	0	0	0
SNV:-10T,4C	0	1	0	0	0	0	0	0	0
SNV:-16T,-6A,5A	0	1	0	0	0	0	0	0	0
SNV:-9T,-8T	0	1	0	0	0	0	0	0	0
SNV:-1A,2C	0	1	0	0	0	0	0	0	0
SNV:-17T,-6G,-2C	0	1	0	0	0	0	0	0	0
SNV:-4C,3A	0	1	0	0	0	0	0	0	0
SNV:-9C,-6T	0	1	0	0	0	0	0	0	0
SNV:-14A,-11C,-6G,-2T,4C,5A	0	1	0	0	0	0	0	0	0
SNV:-5T,5T	0	1	0	0	0	0	0	0	0
SNV:1G,5T	0	1	0	0	0	0	0	0	0
SNV:-8A,4C	0	1	0	0	0	0	0	0	0
SNV:-16C,-14G,2G,3A	0	1	0	0	0	0	0	0	0
SNV:-11C,-8C,5A	0	1	0	0	0	0	0	0	0
SNV:-2C,4C	0	1	0	0	0	0	0	0	0
SNV:-15A,-2T,-1G	0	1	0	0	0	0	0	0	0
SNV:1G,5A	0	1	0	0	0	0	0	0	0
SNV:-13C,3A,4G	0	1	0	0	0	0	0	0	0
SNV:-3A,5A	0	1	0	0	0	0	0	0	0
SNV:2C,5T	0	1	0	0	0	0	0	0	0
SNV:-13C,-7C,5T	0	1	0	0	0	0	0	0	0
SNV:-9C,-5A	0	1	0	0	0	0	0	0	0
SNV:1C,2C	0	1	0	0	0	0	0	0	0
SNV:-12T,3T,5C	0	1	0	0	0	0	0	0	0
SNV:-13C,-12T	0	1	0	0	0	0	0	0	0
SNV:-4C,-2C	0	1	0	0	0	0	0	0	0
SNV:-17T,4C	0	1	0	0	0	0	0	0	0
SNV:-12C,-8C,4C	0	1	0	0	0	0	0	0	0
SNV:-16C,3A	0	1	0	0	0	0	0	0	0
SNV:-4T,5T,6T	0	1	0	0	0	0	0	0	0
SNV:-11C,-7C,-4C	0	1	0	0	0	0	0	0	0
SNV:-17A,2G,4G	0	1	0	0	0	0	0	0	0
SNV:-13A,-3A,1G,2C	0	1	0	0	0	0	0	0	0
SNV:-16C,-10T,-3T,2G,4G	0	1	0	0	0	0	0	0	0
SNV:-15A,-7C,4A,5A	0	1	0	0	0	0	0	0	0
SNV:-15G,-12G,4C	0	1	0	0	0	0	0	0	0
SNV:-5G,2A	0	1	0	0	0	0	0	0	0
SNV:-15A,-6G,1T	0	1	0	0	0	0	0	0	0
SNV:-4T,-2C,-1A	0	1	0	0	0	0	0	0	0
SNV:-3A,4A,5A	0	1	0	0	0	0	0	0	0
SNV:-17T,-16T,-12G,-10T,-9T,-6T,4C	0	1	0	0	0	0	0	0	0
SNV:-9G,-8T,6T	0	1	0	0	0	0	0	0	0
SNV:-6G,4C	0	1	0	0	0	0	0	0	0
SNV:-14C,-9G	0	1	0	0	0	0	0	0	0
SNV:-10T,-9G,2G	0	1	0	0	0	0	0	0	0
SNV:-7C,2C,3T,6C	0	1	0	0	0	0	0	0	0
SNV:-15T,-13T	0	1	0	0	0	0	0	0	0
SNV:-13C,-8T,-7A,-4T,2G,3T	0	1	0	0	0	0	0	0	0
SNV:-11A,2G	0	1	0	0	0	0	0	0	0
SNV:-17T,-5T	0	1	0	0	0	0	0	0	0
SNV:-9G,-1G,1G,2G,5A	0	1	0	0	0	0	0	0	0
SNV:-9G,3C,4G	0	1	0	0	0	0	0	0	0
SNV:-15G,-1G,1C	0	1	0	0	0	0	0	0	0
SNV:-14C,-13T,-6G	0	1	0	0	0	0	0	0	0
SNV:-6T,4G	0	1	0	0	0	0	0	0	0
SNV:-8C,-6A,-5A	0	1	0	0	0	0	0	0	0
SNV:-9C,-5T,5A	0	1	0	0	0	0	0	0	0
SNV:-14A,-9C,2A,5C	0	1	0	0	0	0	0	0	0
SNV:-14C,5C,6T	0	1	0	0	0	0	0	0	0
SNV:-15A,-14C,-11G,-6G,4G	0	1	0	0	0	0	0	0	0
SNV:-1G,5C	0	1	0	0	0	0	0	0	0
SNV:-11C,-3T,1T	0	1	0	0	0	0	0	0	0
SNV:-15T,-7T,2G,5C	0	1	0	0	0	0	0	0	0
SNV:-10T,3C	0	1	0	0	0	0	0	0	0
SNV:-4C,3A,4G	0	1	0	0	0	0	0	0	0
SNV:-13T,2G,3C,4A	0	1	0	0	0	0	0	0	0
SNV:-16C,-14C,-13C,-11C,-8C,-7C,-2C,3C,4C	0	1	0	0	0	0	0	0	0
SNV:-9T,-7C	0	1	0	0	0	0	0	0	0
SNV:-9C,-8T,4C,5C	0	1	0	0	0	0	0	0	0
SNV:-8C,-5T,2G,4A	0	1	0	0	0	0	0	0	0
SNV:-16C,-11C,4A,5A	0	1	0	0	0	0	0	0	0
SNV:-11C,-3T,1G,2G,4A	0	1	0	0	0	0	0	0	0
SNV:-16C,-11G,-9G,-5G	0	1	0	0	0	0	0	0	0
SNV:-17A,-11C,2G	0	1	0	0	0	0	0	0	0
SNV:-17T,3T	0	1	0	0	0	0	0	0	0
SNV:-17A,-10C,-4T	0	1	0	0	0	0	0	0	0
SNV:-6A,-5A,2A	0	1	0	0	0	0	0	0	0
SNV:-9G,-6A	0	1	0	0	0	0	0	0	0
SNV:-14G,-5G,-4C,2G,4G	0	1	0	0	0	0	0	0	0
SNV:-12C,1T	0	1	0	0	0	0	0	0	0
SNV:-17T,-6T	0	1	0	0	0	0	0	0	0
SNV:-10C,-2T,1T	0	1	0	0	0	0	0	0	0
SNV:-13A,-10T	0	1	0	0	0	0	0	0	0
SNV:-15T,5A	0	1	0	0	0	0	0	0	0
SNV:-11C,-9T	0	1	0	0	0	0	0	0	0
SNV:3C,5T,6C	0	1	0	0	0	0	0	0	0
SNV:-5T,3C	0	1	0	0	0	0	0	0	0
SNV:-11C,-10A,4G	0	1	0	0	0	0	0	0	0
SNV:-10C,-5G,-2G	0	1	0	0	0	0	0	0	0
SNV:-10T,-4C,-2G,-1T	0	1	0	0	0	0	0	0	0
SNV:-16T,-9C,-3A	0	1	0	0	0	0	0	0	0
SNV:-17A,-16C,3A	0	1	0	0	0	0	0	0	0
SNV:-13T,-11C,-3T,-1A,2G	0	1	0	0	0	0	0	0	0
SNV:-15A,-5T,2G,3C	0	1	0	0	0	0	0	0	0
SNV:-15A,-4T,4A,5A	0	1	0	0	0	0	0	0	0
SNV:-7C,-6G,5A	0	1	0	0	0	0	0	0	0
SNV:-15G,-7C	0	1	0	0	0	0	0	0	0
SNV:-12G,-6G,4A	0	1	0	0	0	0	0	0	0
SNV:-5T,4G	0	1	0	0	0	0	0	0	0
SNV:-13T,-11C,-10T,4A	0	1	0	0	0	0	0	0	0
SNV:4A,5C	0	1	0	0	0	0	0	0	0
SNV:-11G,2A	0	1	0	0	0	0	0	0	0
SNV:-7T,-3T,4G	0	1	0	0	0	0	0	0	0
SNV:-16T,-5G,-4T	0	1	0	0	0	0	0	0	0
SNV:-15A,-6T	0	1	0	0	0	0	0	0	0
SNV:-7C,1T	0	1	0	0	0	0	0	0	0
SNV:-15G,-11C,-10T,-9G,-7C,4A	0	1	0	0	0	0	0	0	0
SNV:-9T,-8A,3A	0	1	0	0	0	0	0	0	0
SNV:-14C,-9C	0	1	0	0	0	0	0	0	0
SNV:1C,2A,4C,5C,6T	0	1	0	0	0	0	0	0	0
SNV:-9T,-3A	0	1	0	0	0	0	0	0	0
SNV:-13A,-3G	0	1	0	0	0	0	0	0	0
SNV:-15A,-11C,4A	0	1	0	0	0	0	0	0	0
SNV:-2C,1T,4G	0	1	0	0	0	0	0	0	0
SNV:-12T,6A	0	1	0	0	0	0	0	0	0
SNV:-10C,3A	0	1	0	0	0	0	0	0	0
SNV:-17A,2C	0	1	0	0	0	0	0	0	0
SNV:-11C,1G,4A	0	1	0	0	0	0	0	0	0
SNV:1T,6T	0	1	0	0	0	0	0	0	0
SNV:-17T,-3A,4C	0	1	0	0	0	0	0	0	0
SNV:-7C,-3A,5A	0	1	0	0	0	0	0	0	0
SNV:-11C,-2C,2G	0	1	0	0	0	0	0	0	0
SNV:2C,6A	0	1	0	0	0	0	0	0	0
SNV:-3T,4C	0	1	0	0	0	0	0	0	0
SNV:-8T,-7T	0	1	0	0	0	0	0	0	0
SNV:3T,6C	0	1	0	0	0	0	0	0	0
SNV:-9T,-8T,-5T	0	1	0	0	0	0	0	0	0
SNV:-11C,-10C,-2C,2G,4G	0	1	0	0	0	0	0	0	0
SNV:-6G,-2T,4A	0	1	0	0	0	0	0	0	0
SNV:-7C,-6G,-2C,5A	0	1	0	0	0	0	0	0	0
SNV:-12G,-7C	0	1	0	0	0	0	0	0	0
SNV:-17C,2G,3C	0	1	0	0	0	0	0	0	0
SNV:-14C,3T	0	1	0	0	0	0	0	0	0
SNV:-16C,-11C,-8C,2G	0	1	0	0	0	0	0	0	0
SNV:-9G,-5T	0	1	0	0	0	0	0	0	0
SNV:-6G,-5G,3T	0	1	0	0	0	0	0	0	0
SNV:-11A,-7T,-3G,-1T,1T,4A,5T,6T	0	1	0	0	0	0	0	0	0
SNV:-16C,-2T	0	1	0	0	0	0	0	0	0
SNV:-7C,-4T,4A	0	1	0	0	0	0	0	0	0
SNV:-17C,-9C,2G	0	1	0	0	0	0	0	0	0
SNV:-15G,-9G,3C,4C	0	1	0	0	0	0	0	0	0
SNV:-7C,-5A	0	1	0	0	0	0	0	0	0
SNV:-14C,-10C,-8T,2G	0	1	0	0	0	0	0	0	0
SNV:-6A,1T	0	1	0	0	0	0	0	0	0
SNV:-15G,-6A	0	1	0	0	0	0	0	0	0
SNV:-11C,-4C,-3T,-2G,2G,3C	0	1	0	0	0	0	0	0	0
SNV:-17A,1T	0	1	0	0	0	0	0	0	0
SNV:-9C,-7C,5A	0	1	0	0	0	0	0	0	0
SNV:-3G,2A,6T	0	1	0	0	0	0	0	0	0
SNV:-15G,-9G,-5T,-2C	0	1	0	0	0	0	0	0	0
SNV:-8C,-4C,4G	0	1	0	0	0	0	0	0	0
SNV:-16C,-11C,1T,2G	0	1	0	0	0	0	0	0	0
SNV:-3A,4A	0	1	0	0	0	0	0	0	0
SNV:-7C,-3A	0	1	0	0	0	0	0	0	0
SNV:-17A,-16C,-13C,-11C	0	1	0	0	0	0	0	0	0
SNV:-10T,-6G,-4C	0	0	1	0	0	0	0	0	0
SNV:-17T,-6G,4G,6C	0	0	1	0	0	0	0	0	0
SNV:-1G,3T,5C	0	0	1	0	0	0	0	0	0
SNV:-17T,-5A	0	0	1	0	0	0	0	0	0
SNV:-2T,2G	0	0	1	0	0	0	0	0	0
SNV:-11G,-10A,-7T,-4C,4A	0	0	1	0	0	0	0	0	0
SNV:-1G,5A	0	0	1	0	0	0	0	0	0
SNV:-17T,-6A	0	0	1	0	0	0	0	0	0
SNV:-17T,-16T,-13T,-6A	0	0	1	0	0	0	0	0	0
SNV:-9C,-8T,5T	0	0	1	0	0	0	0	0	0
SNV:-10T,-4T	0	0	1	0	0	0	0	0	0
SNV:2A,6C	0	0	1	0	0	0	0	0	0
SNV:-11C,1G	0	0	1	0	0	0	0	0	0
SNV:-9T,-7C,-4T,-1G,1G,5A,6A	0	0	1	0	0	0	0	0	0
SNV:-14G,-12T	0	0	1	0	0	0	0	0	0
SNV:1T,2C,4G,6C	0	0	1	0	0	0	0	0	0
SNV:-5T,3A	0	0	1	0	0	0	0	0	0
SNV:-5T,6C	0	0	1	0	0	0	0	0	0
SNV:-9C,2G,4A	0	0	1	0	0	0	0	0	0
SNV:-17C,-16T,-14G,5T	0	0	1	0	0	0	0	0	0
SNV:-16T,-13C,5T	0	0	1	0	0	0	0	0	0
SNV:-17A,3T	0	0	1	0	0	0	0	0	0
SNV:-11C,-3T,4A	0	0	1	0	0	0	0	0	0
SNV:-9G,-4T	0	0	1	0	0	0	0	0	0
SNV:-16A,3T,5T	0	0	1	0	0	0	0	0	0
SNV:-9G,-8C,-1A	0	0	1	0	0	0	0	0	0
SNV:-13T,-3A,5C	0	0	1	0	0	0	0	0	0
SNV:-16T,-4C	0	0	1	0	0	0	0	0	0
SNV:-13C,-11C,2G,4G	0	0	1	0	0	0	0	0	0
SNV:-16T,-15A,4A	0	0	1	0	0	0	0	0	0
SNV:-13T,6T	0	0	1	0	0	0	0	0	0
SNV:-4T,2G	0	0	1	0	0	0	0	0	0
SNV:-16T,-13A,-8T,-7A,-6A	0	0	1	0	0	0	0	0	0
SNV:-11C,-5G,-4T	0	0	1	0	0	0	0	0	0
SNV:-13C,2C	0	0	1	0	0	0	0	0	0
SNV:-17T,-10C,3T	0	0	1	0	0	0	0	0	0
SNV:-13C,-11C,-4C,1T,5T	0	0	1	0	0	0	0	0	0
SNV:-14G,-12G,-6G	0	0	1	0	0	0	0	0	0
SNV:-6A,-3T	0	0	1	0	0	0	0	0	0
SNV:-15T,-13T,-9G	0	0	1	0	0	0	0	0	0
SNV:-17T,-8A,3T	0	0	1	0	0	0	0	0	0
SNV:-5G,6T	0	0	1	0	0	0	0	0	0
SNV:-1G,1T	0	0	1	0	0	0	0	0	0
SNV:-11C,-2C,4C,5C	0	0	1	0	0	0	0	0	0
SNV:-15A,-1A	0	0	1	0	0	0	0	0	0
SNV:-4A,2G	0	0	1	0	0	0	0	0	0
SNV:-2T,2C	0	0	1	0	0	0	0	0	0
SNV:-5G,-2T,1T,3A,4G	0	0	1	0	0	0	0	0	0
SNV:-17T,-3A	0	0	1	0	0	0	0	0	0
SNV:-2T,1T	0	0	1	0	0	0	0	0	0
SNV:-1G,4G	0	0	1	0	0	0	0	0	0
SNV:1C,3T,4C,5C,6A	0	0	1	0	0	0	0	0	0
SNV:-14G,-10A,4G	0	0	1	0	0	0	0	0	0
SNV:-8A,5T	0	0	0	1	0	0	0	0	0
SNV:-15T,-9G,2C	0	0	0	1	0	0	0	0	0
SNV:-15A,-4C	0	0	0	1	0	0	0	0	0
SNV:-14G,-12G,-4T	0	0	0	1	0	0	0	0	0
SNV:-16A,-13T,-8T,-7T,-2C,5A	0	0	0	1	0	0	0	0	0
SNV:-10A,-9G	0	0	0	1	0	0	0	0	0
SNV:-13T,-9T,-8C,-3T,3C	0	0	0	1	0	0	0	0	0
SNV:-3T,-1A,1T,3A	0	0	0	1	0	0	0	0	0
SNV:-10T,5C	0	0	0	1	0	0	0	0	0
SNV:-14G,-5A	0	0	0	1	0	0	0	0	0
SNV:-17T,-6T,-5G	0	0	0	1	0	0	0	0	0
SNV:-13T,-4T,1C,6C	0	0	0	1	0	0	0	0	0
SNV:-17T,-8A	0	0	0	1	0	0	0	0	0
SNV:-3T,5T	0	0	0	1	0	0	0	0	0
SNV:-13A,4G	0	0	0	1	0	0	0	0	0
SNV:-9G,-6T	0	0	0	1	0	0	0	0	0
SNV:-13T,-6T	0	0	0	1	0	0	0	0	0
SNV:-15G,-2G,5C	0	0	0	1	0	0	0	0	0
SNV:3A,4A	0	0	0	1	0	0	0	0	0
SNV:-17A,-7T,-2T,4G	0	0	0	1	0	0	0	0	0
SNV:-4C,-3A,-2C,6T	0	0	0	1	0	0	0	0	0
SNV:-16C,-11C,2C	0	0	0	1	0	0	0	0	0
SNV:-2C,1C,4G	0	0	0	1	0	0	0	0	0
SNV:-17C,-15A,-9T,-8C,-2C	0	0	0	1	0	0	0	0	0
SNV:-3A,-2G	0	0	0	1	0	0	0	0	0
SNV:-17T,-16T,-15T,-14C,-12T,5C	0	0	0	1	0	0	0	0	0
SNV:-9C,2C,6C	0	0	0	1	0	0	0	0	0
SNV:-11C,-7C,3C	0	0	0	1	0	0	0	0	0
SNV:-9G,-8C,1G,3C,4A,5A	0	0	0	1	0	0	0	0	0
SNV:-16C,-11C,-10T,-2C,1T,2G	0	0	0	1	0	0	0	0	0
SNV:-9G,-2T,-1G	0	0	0	1	0	0	0	0	0
SNV:-15G,-9T,-3T,4G,6C	0	0	0	1	0	0	0	0	0
SNV:-17T,-8C	0	0	0	1	0	0	0	0	0
SNV:-6G,-5G,-4T,-3T	0	0	0	1	0	0	0	0	0
SNV:-11C,-8C,-7C,1C,2C,4A	0	0	0	1	0	0	0	0	0
SNV:-13T,-11C,-2T	0	0	0	1	0	0	0	0	0
SNV:-16T,-10C,-9C	0	0	0	0	1	0	0	0	0
SNV:-8C,-6T	0	0	0	0	1	0	0	0	0
SNV:-14G,3A	0	0	0	0	1	0	0	0	0
SNV:-13T,-8T,5C	0	0	0	0	1	0	0	0	0
SNV:-16T,-14G,-7T	0	0	0	0	1	0	0	0	0
SNV:-16T,-7T	0	0	0	0	1	0	0	0	0
SNV:-6A,-4A,6T	0	0	0	0	1	0	0	0	0
SNV:-15T,4C	0	0	0	0	1	0	0	0	0
SNV:-8T,3A	0	0	0	0	1	0	0	0	0
SNV:-17T,-9G,-5G	0	0	0	0	1	0	0	0	0
SNV:-5T,5C	0	0	0	0	1	0	0	0	0
SNV:-3A,3A,5T,6C	0	0	0	0	1	0	0	0	0
SNV:-13A,-1G	0	0	0	0	1	0	0	0	0
SNV:-15A,-4T,-3A,4A	0	0	0	0	1	0	0	0	0
SNV:-12T,-8T,2C	0	0	0	0	1	0	0	0	0
SNV:-16C,-11C,-9G,2G	0	0	0	0	1	0	0	0	0
SNV:-16T,-15A	0	0	0	0	1	0	0	0	0
SNV:-5A,2C,6T	0	0	0	0	1	0	0	0	0
SNV:-2C,4A	0	0	0	0	1	0	0	0	0
SNV:-10A,-9C,-8C,3C,6C	0	0	0	0	1	0	0	0	0
SNV:-3G,-1G	0	0	0	0	1	0	0	0	0
SNV:-1G,3A,4G	0	0	0	0	1	0	0	0	0
SNV:-4A,6T	0	0	0	0	1	0	0	0	0
SNV:-9G,-5T,-3T	0	0	0	0	1	0	0	0	0
SNV:-12T,6T	0	0	0	0	1	0	0	0	0
SNV:5T,6C	0	0	0	0	1	0	0	0	0
SNV:-16C,-11C,-3T,4G	0	0	0	0	1	0	0	0	0
SNV:-5G,2G,3T	0	0	0	0	1	0	0	0	0
SNV:-11G,-6A	0	0	0	0	1	0	0	0	0
SNV:-15T,-14G,-4C,-3T	0	0	0	0	1	0	0	0	0
SNV:-16T,-13A,3A,4A	0	0	0	0	1	0	0	0	0
SNV:-7C,2G	0	0	0	0	1	0	0	0	0
SNV:-17A,-1A,3A	0	0	0	0	1	0	0	0	0
SNV:-16C,-13C,-11C,-3T	0	0	0	0	1	0	0	0	0
SNV:-9G,-6G,5C	0	0	0	0	1	0	0	0	0
SNV:-17A,-5G,2G	0	0	0	0	1	0	0	0	0
SNV:-4T,1T,2G	0	0	0	0	1	0	0	0	0
SNV:-17A,-11C,-10C,-5G,4G	0	0	0	0	1	0	0	0	0
SNV:-16C,-13T,-11C	0	0	0	0	1	0	0	0	0
SNV:-16C,-13T,-10T,-9G,-7T	0	0	0	0	1	0	0	0	0
SNV:-1A,1G,2G,4G	0	0	0	0	1	0	0	0	0
SNV:-13T,-10T,-8T,2G	0	0	0	0	1	0	0	0	0
SNV:-13A,-7C,1T	0	0	0	0	1	0	0	0	0
SNV:-12G,-11C,-2C,4A	0	0	0	0	1	0	0	0	0
SNV:-11A,-6A	0	0	0	0	1	0	0	0	0
SNV:-13C,-5T	0	0	0	0	1	0	0	0	0
SNV:-9T,4G	0	0	0	0	1	0	0	0	0
SNV:-15G,5A	0	0	0	0	1	0	0	0	0
SNV:-13A,-12T	0	0	0	0	1	0	0	0	0
SNV:-10T,-7C,4A	0	0	0	0	1	0	0	0	0
SNV:-16C,-14G,-11C,2G	0	0	0	0	1	0	0	0	0
SNV:-13T,-1T	0	0	0	0	1	0	0	0	0
SNV:-10C,-5G,-1A	0	0	0	0	1	0	0	0	0
SNV:-16T,-13T,-2T,3C	0	0	0	0	1	0	0	0	0
SNV:-17A,-7T,3A	0	0	0	0	1	0	0	0	0
SNV:-2C,-1A	0	0	0	0	1	0	0	0	0
SNV:-8T,-6A,2G,4G	0	0	0	0	1	0	0	0	0
SNV:-13T,-12C,-6A	0	0	0	0	1	0	0	0	0
SNV:-5T,4C	0	0	0	0	1	0	0	0	0
SNV:-16T,-11C,3A	0	0	0	0	1	0	0	0	0
SNV:-16C,-14G,-11C,1T,2G,4G	0	0	0	0	1	0	0	0	0
SNV:-16A,-13C,-1A,4G	0	0	0	0	1	0	0	0	0
SNV:-16C,3A,4G	0	0	0	0	1	0	0	0	0
SNV:-6A,-4A	0	0	0	0	1	0	0	0	0
SNV:-16C,-11C,1T	0	0	0	0	1	0	0	0	0
SNV:-11C,-7T,1T,3A	0	0	0	0	1	0	0	0	0
SNV:-17T,-13T,-10A,-4T,-2T	0	0	0	0	1	0	0	0	0
SNV:-2C,4G	0	0	0	0	1	0	0	0	0
SNV:-17T,-13T,-6T,-4T	0	0	0	0	1	0	0	0	0
SNV:-8C,5A	0	0	0	0	1	0	0	0	0
SNV:-16T,-13C	0	0	0	0	1	0	0	0	0
SNV:-9C,6T	0	0	0	0	1	0	0	0	0
SNV:-14C,-13A,-6T	0	0	0	0	1	0	0	0	0
SNV:-15A,-3A,4A	0	0	0	0	1	0	0	0	0
SNV:-13C,-5T,-2T	0	0	0	0	1	0	0	0	0
SNV:-14A,-13T	0	0	0	0	1	0	0	0	0
SNV:-11C,-9G,-1G,1G,5A	0	0	0	0	1	0	0	0	0
SNV:-13T,-2C	0	0	0	0	1	0	0	0	0
SNV:-6T,-1G,1C	0	0	0	0	1	0	0	0	0
SNV:-16T,-6A,6T	0	0	0	0	1	0	0	0	0
SNV:-11C,-10C,2G,4G	0	0	0	0	1	0	0	0	0
SNV:-15G,-13T,-10T,-9G	0	0	0	0	1	0	0	0	0
SNV:-10A,-2C,2A	0	0	0	0	1	0	0	0	0
SNV:-16C,1G,2G,3C	0	0	0	0	1	0	0	0	0
SNV:-15A,-3A	0	0	0	0	1	0	0	0	0
SNV:-6T,-4C,4C	0	0	0	0	1	0	0	0	0
SNV:-10A,2A	0	0	0	0	1	0	0	0	0
SNV:-10C,2G,4G	0	0	0	0	1	0	0	0	0
SNV:-17T,-15G,-9C	0	0	0	0	1	0	0	0	0
SNV:-9G,-1A,2G	0	0	0	0	1	0	0	0	0
SNV:-11C,-1A,3A	0	0	0	0	1	0	0	0	0
SNV:-13T,-10T	0	0	0	0	1	0	0	0	0
SNV:-6G,-4T,4A	0	0	0	0	1	0	0	0	0
SNV:-12G,4A	0	0	0	0	1	0	0	0	0
SNV:-4T,-1A	0	0	0	0	1	0	0	0	0
SNV:-16C,1T	0	0	0	0	1	0	0	0	0
SNV:-17C,-11C,-7C,2C,3T,4A	0	0	0	0	1	0	0	0	0
SNV:-11A,-3G	0	0	0	0	1	0	0	0	0
SNV:-13T,-11C,3C	0	0	0	0	1	0	0	0	0
SNV:-15T,-14G,-4C	0	0	0	0	1	0	0	0	0
SNV:-7C,-6A	0	0	0	0	1	0	0	0	0
SNV:-16T,-10T,-8A,-5G,5T	0	0	0	0	1	0	0	0	0
SNV:-12C,-5G,2G	0	0	0	0	1	0	0	0	0
SNV:-13T,-5G,2C	0	0	0	0	1	0	0	0	0
SNV:-15A,-13T,4G	0	0	0	0	1	0	0	0	0
SNV:-10T,-9G,-7C	0	0	0	0	1	0	0	0	0
SNV:-12G,-11C,5A	0	0	0	0	1	0	0	0	0
SNV:-16T,-13T,-9G,5A	0	0	0	0	1	0	0	0	0
SNV:-5G,-3T	0	0	0	0	1	0	0	0	0
SNV:-6G,-4A,3C,5A,6C	0	0	0	0	1	0	0	0	0
SNV:-15G,-13T,-12T,-9G	0	0	0	0	1	0	0	0	0
SNV:-17T,4G	0	0	0	0	1	0	0	0	0
SNV:-14A,-9T,-5T,-3G	0	0	0	0	1	0	0	0	0
SNV:-11G,-5G,-3A,-2C	0	0	0	0	1	0	0	0	0
SNV:-16T,-13A,-10T,-5T,4A	0	0	0	0	1	0	0	0	0
SNV:-13T,-5G,3T,4G	0	0	0	0	1	0	0	0	0
SNV:-13T,-2C,2G	0	0	0	0	1	0	0	0	0
SNV:-15T,-8C,-7T,-6T,-4T,-2G,-1A	0	0	0	0	1	0	0	0	0
SNV:-16T,4C	0	0	0	0	1	0	0	0	0
SNV:-9T,-2C,-1G	0	0	0	0	1	0	0	0	0
SNV:-11C,-8C,-7C,3C,4A	0	0	0	0	1	0	0	0	0
SNV:-17A,-5G,3A	0	0	0	0	1	0	0	0	0
SNV:-17A,-14G,-11C	0	0	0	0	1	0	0	0	0
SNV:-13C,-7A	0	0	0	0	1	0	0	0	0
SNV:-12G,-4T,4A	0	0	0	0	1	0	0	0	0
SNV:-15A,-7C,-4T	0	0	0	0	1	0	0	0	0
SNV:-8T,-7C	0	0	0	0	1	0	0	0	0
SNV:-13T,-11C,-2C	0	0	0	0	1	0	0	0	0
SNV:-8C,4C,5C	0	0	0	0	1	0	0	0	0
SNV:-16T,-11C,-5T	0	0	0	0	1	0	0	0	0
SNV:-17A,2G	0	0	0	0	1	0	0	0	0
SNV:-10A,-8C,4C,5A	0	0	0	0	1	0	0	0	0
SNV:-11G,-9G	0	0	0	0	1	0	0	0	0
SNV:-15A,-6G,5A	0	0	0	0	1	0	0	0	0
SNV:-15A,-9C	0	0	0	0	1	0	0	0	0
SNV:-15A,2C	0	0	0	0	1	0	0	0	0
SNV:-15A,-6G,4A	0	0	0	0	1	0	0	0	0
SNV:-17C,-8C	0	0	0	0	1	0	0	0	0
SNV:-16C,-13C	0	0	0	0	1	0	0	0	0
SNV:-9C,-8A	0	0	0	0	1	0	0	0	0
SNV:-2G,5C	0	0	0	0	1	0	0	0	0
SNV:-13C,-10C,-2C,2C	0	0	0	0	1	0	0	0	0
SNV:-15A,-5T	0	0	0	0	1	0	0	0	0
SNV:-17T,-4C,2G,3C	0	0	0	0	1	0	0	0	0
SNV:-10T,-9G,-5T	0	0	0	0	1	0	0	0	0
SNV:-11C,-9G,1G,5A	0	0	0	0	1	0	0	0	0
SNV:-15T,-14C,-13A,-12T,5C	0	0	0	0	1	0	0	0	0
SNV:-4T,-2C,1G,2C,3C,6C	0	0	0	0	1	0	0	0	0
SNV:-17C,-15T,-12C,-8T,-3T,2A,6C	0	0	0	0	1	0	0	0	0
SNV:-9T,-8C,2A	0	0	0	0	1	0	0	0	0
SNV:-6T,-1G,4C	0	0	0	0	1	0	0	0	0
SNV:-6A,3A,5C	0	0	0	0	1	0	0	0	0
SNV:-13T,-12T,-5G	0	0	0	0	1	0	0	0	0
SNV:-16T,-10T,-4T	0	0	0	0	1	0	0	0	0
SNV:-17A,-13C,-10C,-5G,4G	0	0	0	0	1	0	0	0	0
SNV:-16T,-15G,-13T,-8T,-6A,3T	0	0	0	0	1	0	0	0	0
SNV:-16T,-13A,-10T,4G	0	0	0	0	1	0	0	0	0
SNV:-11A,-7C,-4T,6A	0	0	0	0	1	0	0	0	0
SNV:-17A,-12T,-5G	0	0	0	0	1	0	0	0	0
SNV:-16C,1T,4G	0	0	0	0	1	0	0	0	0
SNV:-17A,-11C,2G,3A,4G	0	0	0	0	1	0	0	0	0
SNV:-5A,5C,6T	0	0	0	0	1	0	0	0	0
SNV:-11C,2G,3A	0	0	0	0	1	0	0	0	0
SNV:-15T,2C,4G	0	0	0	0	1	0	0	0	0
SNV:-15G,-9G,5A	0	0	0	0	1	0	0	0	0
SNV:-16T,3A	0	0	0	0	1	0	0	0	0
SNV:-11C,-3T,1G	0	0	0	0	1	0	0	0	0
SNV:-10T,-6T,2G	0	0	0	0	1	0	0	0	0
SNV:2C,6T	0	0	0	0	1	0	0	0	0
SNV:-11C,-10T,-7C,4A,5A	0	0	0	0	1	0	0	0	0
SNV:-16C,-11C,4A	0	0	0	0	1	0	0	0	0
SNV:-9T,3A	0	0	0	0	1	0	0	0	0
SNV:-17A,-16C,-11C,2G	0	0	0	0	1	0	0	0	0
SNV:-13T,-4A,-3G,3A	0	0	0	0	1	0	0	0	0
SNV:-9T,-5A,-1T,1T,2C	0	0	0	0	1	0	0	0	0
SNV:-5G,1T,4G	0	0	0	0	1	0	0	0	0
SNV:-7T,2G	0	0	0	0	1	0	0	0	0
SNV:-14G,-6G	0	0	0	0	1	0	0	0	0
SNV:-14C,-3G,2C	0	0	0	0	1	0	0	0	0
SNV:-11C,3A,4G	0	0	0	0	1	0	0	0	0
SNV:-17T,5T	0	0	0	0	1	0	0	0	0
SNV:-12G,-6G,-3G,-2C	0	0	0	0	1	0	0	0	0
SNV:-11C,5T	0	0	0	0	1	0	0	0	0
SNV:-11C,2C,5A	0	0	0	0	1	0	0	0	0
SNV:-11C,-1G,2G	0	0	0	0	1	0	0	0	0
SNV:-11A,2A	0	0	0	0	1	0	0	0	0
SNV:-9T,-6T,1T	0	0	0	0	1	0	0	0	0
SNV:-13T,-9G,4A	0	0	0	0	1	0	0	0	0
SNV:-9G,-8C,5T,6A	0	0	0	0	1	0	0	0	0
SNV:-6G,-3T,4A	0	0	0	0	1	0	0	0	0
SNV:-17A,-4T	0	0	0	0	1	0	0	0	0
SNV:-4T,1T,4G	0	0	0	0	1	0	0	0	0
SNV:-3G,-2G	0	0	0	0	1	0	0	0	0
SNV:-16T,-15T,-12T,-6G,4A	0	0	0	0	1	0	0	0	0
SNV:-11C,-5T	0	0	0	0	1	0	0	0	0
SNV:-3G,1C	0	0	0	0	1	0	0	0	0
SNV:-16T,3C	0	0	0	0	1	0	0	0	0
SNV:-11C,-5G,-4C,4G	0	0	0	0	1	0	0	0	0
SNV:-17T,1C	0	0	0	0	1	0	0	0	0
SNV:-16T,-13T,1C,3T	0	0	0	0	1	0	0	0	0
SNV:-17T,-16T,-15A,-5T,-4A	0	0	0	0	1	0	0	0	0
SNV:-9C,-5G	0	0	0	0	1	0	0	0	0
SNV:-11C,-7T,-6A	0	0	0	0	1	0	0	0	0
SNV:-7C,-3T	0	0	0	0	1	0	0	0	0
SNV:-7T,-4T	0	0	0	0	1	0	0	0	0
SNV:-17T,-15G,-9T,-5T	0	0	0	0	1	0	0	0	0
SNV:-9T,-5T	0	0	0	0	1	0	0	0	0
SNV:-17A,-16C,-11C,-5G,4G	0	0	0	0	1	0	0	0	0
SNV:-17C,-1G,4G	0	0	0	0	1	0	0	0	0
SNV:-11C,-1A,2C,3C	0	0	0	0	1	0	0	0	0
SNV:-5G,2G,3A	0	0	0	0	1	0	0	0	0
SNV:-17A,-13C,-4T	0	0	0	0	1	0	0	0	0
SNV:-15T,6C	0	0	0	0	1	0	0	0	0
SNV:2C,4G	0	0	0	0	1	0	0	0	0
SNV:-13T,-9G,2G,4A	0	0	0	0	1	0	0	0	0
SNV:-8A,-5A,2G,4C,6T	0	0	0	0	1	0	0	0	0
SNV:-8T,-1G,1C,2A	0	0	0	0	1	0	0	0	0
SNV:-8T,-6G,4C	0	0	0	0	1	0	0	0	0
SNV:-10A,4A	0	0	0	0	1	0	0	0	0
SNV:-7C,6A	0	0	0	0	1	0	0	0	0
SNV:-15G,2C,6T	0	0	0	0	1	0	0	0	0
SNV:-8T,-6T	0	0	0	0	1	0	0	0	0
SNV:-12G,-6G,-4T	0	0	0	0	1	0	0	0	0
SNV:-15A,-10A,6C	0	0	0	0	1	0	0	0	0
SNV:-14G,-13C,-11C,-2C,1T	0	0	0	0	1	0	0	0	0
SNV:-16C,-11C,-5T,-3T,2G	0	0	0	0	1	0	0	0	0
SNV:-16C,-11C,-7T,4G	0	0	0	0	1	0	0	0	0
SNV:-13T,-11C,-5G,3A,4G	0	0	0	0	1	0	0	0	0
SNV:-11A,5C	0	0	0	0	1	0	0	0	0
SNV:-4C,-3A,1G	0	0	0	0	1	0	0	0	0
SNV:-15A,-12G,-6G	0	0	0	0	1	0	0	0	0
SNV:-2T,3T	0	0	0	0	1	0	0	0	0
SNV:-8T,-6A,-3A,-1G	0	0	0	0	1	0	0	0	0
SNV:-8C,-2G	0	0	0	0	1	0	0	0	0
SNV:-5A,-4C,2C	0	0	0	0	1	0	0	0	0
SNV:4C,5A,6C	0	0	0	0	1	0	0	0	0
SNV:-11C,-9T,-8T,-7C,-4C	0	0	0	0	1	0	0	0	0
SNV:-15A,-12T	0	0	0	0	1	0	0	0	0
SNV:-12C,-11C,-6G,-4T,-3T,-2G	0	0	0	0	1	0	0	0	0
SNV:-10C,-1G,1T	0	0	0	0	1	0	0	0	0
SNV:-9G,-8C,-7C,-3T,-1G,2G,4A	0	0	0	0	1	0	0	0	0
SNV:-9G,3C,4A	0	0	0	0	1	0	0	0	0
SNV:-11C,2G,3A,4G	0	0	0	0	1	0	0	0	0
SNV:-16C,-11C,-3T,3C	0	0	0	0	1	0	0	0	0
SNV:-16T,-14C,-13C,-11G,-6A,-2C,1T,4C,5T	0	0	0	0	1	0	0	0	0
SNV:-7T,4G,6A	0	0	0	0	1	0	0	0	0
SNV:-14C,-3G,3T	0	0	0	0	1	0	0	0	0
SNV:-11C,-10C,1T,3A	0	0	0	0	1	0	0	0	0
SNV:-4T,-3T,4A	0	0	0	0	1	0	0	0	0
SNV:-17C,-16C,-8C,-7C,-4T	0	0	0	0	1	0	0	0	0
SNV:-15T,-12G,-6G,-4T	0	0	0	0	1	0	0	0	0
SNV:-14C,6C	0	0	0	0	1	0	0	0	0
SNV:-17T,-3T,-2C	0	0	0	0	1	0	0	0	0
SNV:-11C,-5G,-3T,2G	0	0	0	0	1	0	0	0	0
SNV:-13T,-1G,1C,5C	0	0	0	0	1	0	0	0	0
SNV:-5A,-4T	0	0	0	0	1	0	0	0	0
SNV:-11A,2G,5T	0	0	0	0	1	0	0	0	0
SNV:-16C,-14G	0	0	0	0	1	0	0	0	0
SNV:-12T,-2T	0	0	0	0	1	0	0	0	0
SNV:-13T,-2T,-1G,2G	0	0	0	0	1	0	0	0	0
SNV:-11C,-9G,-8C,2C	0	0	0	0	1	0	0	0	0
SNV:-14A,-7A,-6A,-3T,6A	0	0	0	0	1	0	0	0	0
SNV:-8C,5C	0	0	0	0	1	0	0	0	0
SNV:-4A,4C	0	0	0	0	1	0	0	0	0
SNV:-17A,-16C,2G	0	0	0	0	1	0	0	0	0
SNV:-17T,-16A	0	0	0	0	1	0	0	0	0
SNV:-15G,-4T	0	0	0	0	1	0	0	0	0
SNV:-8C,4A,5A	0	0	0	0	1	0	0	0	0
SNV:-5A,-1T,2C,6T	0	0	0	0	1	0	0	0	0
SNV:-13T,-11C,4A	0	0	0	0	1	0	0	0	0
SNV:-17A,-13C,-10C,-5G	0	0	0	0	1	0	0	0	0
SNV:-16C,-5G,3A	0	0	0	0	1	0	0	0	0
SNV:-16C,-11C,-10C	0	0	0	0	1	0	0	0	0
SNV:-3T,4A,5A	0	0	0	0	1	0	0	0	0
SNV:-17T,-9G,-8C,-7C,6C	0	0	0	0	1	0	0	0	0
SNV:-2T,-1T	0	0	0	0	1	0	0	0	0
SNV:-8C,-7T,-6A,-5A,5A	0	0	0	0	1	0	0	0	0
SNV:3C,5C,6T	0	0	0	0	1	0	0	0	0
SNV:-9G,1C,2A	0	0	0	0	1	0	0	0	0
SNV:-11G,-5T	0	0	0	0	1	0	0	0	0
SNV:-16T,-4T	0	0	0	0	1	0	0	0	0
SNV:-17T,-16T,-14A,-13T,-10C,-9T,-4A	0	0	0	0	1	0	0	0	0
SNV:-15A,-7C,-6T,-4T,-3T	0	0	0	0	1	0	0	0	0
SNV:-11C,-3T,6A	0	0	0	0	1	0	0	0	0
SNV:-17T,-14C	0	0	0	0	1	0	0	0	0
SNV:-16A,-8A	0	0	0	0	0	1	0	0	0
SNV:-7A,-1G,1C	0	0	0	0	0	1	0	0	0
SNV:-14C,-12T,-11G,-5T	0	0	0	0	0	1	0	0	0
SNV:-8A,-6A,5T	0	0	0	0	0	1	0	0	0
SNV:-8C,-2C	0	0	0	0	0	1	0	0	0
SNV:-5A,6T	0	0	0	0	0	1	0	0	0
SNV:-8A,-4C,4G	0	0	0	0	0	1	0	0	0
SNV:-7C,-4T,-3A,4G	0	0	0	0	0	1	0	0	0
SNV:-16T,-6T	0	0	0	0	0	1	0	0	0
SNV:-15T,-9T,6T	0	0	0	0	0	1	0	0	0
SNV:-14C,-9C,-4C,1C	0	0	0	0	0	1	0	0	0
SNV:-4A,4A	0	0	0	0	0	1	0	0	0
SNV:-16T,-15T,-13A,2A,5T	0	0	0	0	0	1	0	0	0
SNV:-15G,-12C,-11A,-9C,-5A	0	0	0	0	0	1	0	0	0
SNV:-10C,4A	0	0	0	0	0	1	0	0	0
SNV:-13T,-11C,-4C,-2G	0	0	0	0	0	1	0	0	0
SNV:-2T,5T	0	0	0	0	0	1	0	0	0
SNV:-5T,-4T	0	0	0	0	0	1	0	0	0
SNV:-16C,1G	0	0	0	0	0	1	0	0	0
SNV:-16C,-9C,1C,2C,6C	0	0	0	0	0	1	0	0	0
SNV:-16A,-3G	0	0	0	0	0	1	0	0	0
SNV:-12T,-11A,-6G	0	0	0	0	0	1	0	0	0
SNV:-9C,4G	0	0	0	0	0	1	0	0	0
SNV:-14A,-11G,-3G,2A,5C	0	0	0	0	0	1	0	0	0
SNV:-14C,-13A,-3A,-2T,2C,3C	0	0	0	0	0	1	0	0	0
SNV:-2T,-1G,3A,4G	0	0	0	0	0	1	0	0	0
SNV:-13T,-11C,-5G	0	0	0	0	0	1	0	0	0
SNV:-15G,-1G,4A	0	0	0	0	0	1	0	0	0
SNV:-16T,-13A,-10T,-9G	0	0	0	0	0	1	0	0	0
SNV:-9C,-8T,-5T	0	0	0	0	0	1	0	0	0
SNV:-11G,-9G,-8C,-6A,-5G,1C	0	0	0	0	0	1	0	0	0
SNV:-17T,-9G,-4T,4A	0	0	0	0	0	1	0	0	0
SNV:-9G,-7A,-6G,1G	0	0	0	0	0	1	0	0	0
SNV:-11C,-7T	0	0	0	0	0	1	0	0	0
SNV:-13A,-11C	0	0	0	0	0	1	0	0	0
SNV:-14G,-12G,-7C,-6G,-2C,4A	0	0	0	0	0	1	0	0	0
SNV:-11C,-10C,-7C,3T,6C	0	0	0	0	0	1	0	0	0
SNV:-8C,4C,6A	0	0	0	0	0	1	0	0	0
SNV:-4C,5A	0	0	0	0	0	1	0	0	0
SNV:-12G,-6A,1T	0	0	0	0	0	1	0	0	0
SNV:-12C,3C	0	0	0	0	0	1	0	0	0
SNV:2G,4G,6A	0	0	0	0	0	1	0	0	0
SNV:-17T,-16T	0	0	0	0	0	1	0	0	0
SNV:-8T,-3T	0	0	0	0	0	1	0	0	0
SNV:-17C,-2T,2G	0	0	0	0	0	1	0	0	0
SNV:-9C,-3A	0	0	0	0	0	1	0	0	0
SNV:-11C,-9G,-4C,-2G,2G	0	0	0	0	0	1	0	0	0
SNV:-1G,1C,5C	0	0	0	0	0	1	0	0	0
SNV:-13T,-11C,-5T,2G	0	0	0	0	0	1	0	0	0
SNV:-5G,-3T,-1A,2G	0	0	0	0	0	1	0	0	0
SNV:-16T,-5A,-4T	0	0	0	0	0	1	0	0	0
SNV:-17C,-15T	0	0	0	0	0	1	0	0	0
SNV:-16C,-4C,4C,6C	0	0	0	0	0	1	0	0	0
SNV:-13C,-1G,1C	0	0	0	0	0	1	0	0	0
SNV:-11C,-9C,-8C,1G	0	0	0	0	0	1	0	0	0
SNV:-4T,3A,4G	0	0	0	0	0	1	0	0	0
SNV:-6T,4G,6A	0	0	0	0	0	1	0	0	0
SNV:-8C,1C,2A	0	0	0	0	0	1	0	0	0
SNV:-16C,-11C,-1A,3A,4G	0	0	0	0	0	1	0	0	0
SNV:-17A,-2C,-1G	0	0	0	0	0	1	0	0	0
SNV:-2G,1C	0	0	0	0	0	1	0	0	0
SNV:-16T,-1T,4G	0	0	0	0	0	1	0	0	0
SNV:-16A,-11G,-7T,1T,3C	0	0	0	0	0	1	0	0	0
SNV:-17C,-16T,-9C,-8T	0	0	0	0	0	1	0	0	0
SNV:-4C,2C,4G	0	0	0	0	0	1	0	0	0
SNV:-16C,2G,3A	0	0	0	0	0	1	0	0	0
SNV:-11C,-4C,2G,5A	0	0	0	0	0	1	0	0	0
SNV:-13A,5C	0	0	0	0	0	1	0	0	0
SNV:-13C,-11C,4G	0	0	0	0	0	1	0	0	0
SNV:-13T,3T	0	0	0	0	0	1	0	0	0
SNV:-17T,-15T,-8T	0	0	0	0	0	1	0	0	0
SNV:-16C,-9T,-7T	0	0	0	0	0	1	0	0	0
SNV:-5T,3T	0	0	0	0	0	1	0	0	0
SNV:-10A,-9C	0	0	0	0	0	1	0	0	0
SNV:-9G,-6G,-3T	0	0	0	0	0	1	0	0	0
SNV:-17T,2C	0	0	0	0	0	1	0	0	0
SNV:-8C,1C	0	0	0	0	0	1	0	0	0
SNV:-11G,-6A,-3G	0	0	0	0	0	1	0	0	0
SNV:-15T,-14G,-13T,-3G,3T	0	0	0	0	0	1	0	0	0
SNV:-14G,-1A	0	0	0	0	0	1	0	0	0
SNV:-3T,-2G,3C	0	0	0	0	0	1	0	0	0
SNV:-10T,-6T,6C	0	0	0	0	0	1	0	0	0
SNV:1G,4C	0	0	0	0	0	1	0	0	0
SNV:-16T,-8C,-3T,3T,4C	0	0	0	0	0	1	0	0	0
SNV:-17C,-8C,2C,3C	0	0	0	0	0	1	0	0	0
SNV:-11C,3T,4G	0	0	0	0	0	1	0	0	0
SNV:-3A,2A,3T	0	0	0	0	0	1	0	0	0
SNV:-13T,-6G	0	0	0	0	0	0	1	0	0
SNV:-16T,-9C	0	0	0	0	0	0	1	0	0
SNV:-9G,-8C,-7C,3C,4A	0	0	0	0	0	0	1	0	0
SNV:-17T,2A	0	0	0	0	0	0	1	0	0
SNV:-16C,4A	0	0	0	0	0	0	1	0	0
SNV:-13A,-9G,3A	0	0	0	0	0	0	1	0	0
SNV:-11C,-7C,5A	0	0	0	0	0	0	1	0	0
SNV:-16C,-11C,-3T,2G,4G	0	0	0	0	0	0	1	0	0
SNV:-17T,-15A	0	0	0	0	0	0	1	0	0
SNV:-16T,-7T,-4T	0	0	0	0	0	0	1	0	0
SNV:-12T,-6G	0	0	0	0	0	0	1	0	0
SNV:-13T,-8T	0	0	0	0	0	0	1	0	0
SNV:-1A,2A	0	0	0	0	0	0	1	0	0
SNV:-13C,6C	0	0	0	0	0	0	1	0	0
SNV:5A,6T	0	0	0	0	0	0	1	0	0
SNV:-10C,-5T,2C,3T,4A	0	0	0	0	0	0	1	0	0
SNV:-15A,-14G,-7T,-4T,-3A	0	0	0	0	0	0	1	0	0
SNV:-9C,1C,2C,4C,6C	0	0	0	0	0	0	1	0	0
SNV:-13A,-7C,-6T	0	0	0	0	0	0	1	0	0
SNV:-15G,-2C,5T	0	0	0	0	0	0	1	0	0
SNV:-16T,-13C,-11C	0	0	0	0	0	0	1	0	0
SNV:-17T,-6G,4A,5A	0	0	0	0	0	0	1	0	0
SNV:-6G,1T	0	0	0	0	0	0	1	0	0
SNV:-13T,-2G	0	0	0	0	0	0	1	0	0
SNV:-11G,-6A,2A	0	0	0	0	0	0	1	0	0
SNV:-8C,3C,4A	0	0	0	0	0	0	1	0	0
SNV:-16T,-5G	0	0	0	0	0	0	1	0	0
SNV:-17A,-16A,-13T	0	0	0	0	0	0	1	0	0
SNV:-17A,-3T	0	0	0	0	0	0	1	0	0
SNV:-13C,-9C,1C,4G	0	0	0	0	0	0	1	0	0
SNV:-13T,-4C	0	0	0	0	0	0	1	0	0
SNV:-14G,-13T,-5G	0	0	0	0	0	0	1	0	0
SNV:-14G,-9G	0	0	0	0	0	0	1	0	0
SNV:-13T,-11C,-7C,-3T,2G	0	0	0	0	0	0	1	0	0
SNV:-10C,-9C,-4C,1C,2C	0	0	0	0	0	0	1	0	0
SNV:-16T,4G	0	0	0	0	0	0	1	0	0
SNV:-5G,1T,5T	0	0	0	0	0	0	1	0	0
SNV:-11C,-4C,3A	0	0	0	0	0	0	1	0	0
SNV:-15G,-11C,-10C,5T	0	0	0	0	0	0	1	0	0
SNV:-12C,-4T	0	0	0	0	0	0	1	0	0
SNV:-13C,-6G	0	0	0	0	0	0	1	0	0
SNV:-15A,-11C,-4T	0	0	0	0	0	0	1	0	0
SNV:-12G,-11C,-10A,-3A,5T	0	0	0	0	0	0	1	0	0
SNV:-4C,2G	0	0	0	0	0	0	1	0	0
SNV:-15A,-4T,-3T,-2C	0	0	0	0	0	0	1	0	0
SNV:-11G,-9C	0	0	0	0	0	0	1	0	0
SNV:-17A,-13C,-9G,-3T,3T,4C,5T	0	0	0	0	0	0	1	0	0
SNV:-9G,1C,2C,5C	0	0	0	0	0	0	1	0	0
SNV:-9G,-6G	0	0	0	0	0	0	1	0	0
SNV:-16T,-6A,-5A	0	0	0	0	0	0	1	0	0
SNV:-14C,-12T,-6T,-4A,6T	0	0	0	0	0	0	1	0	0
SNV:-12C,5T	0	0	0	0	0	0	1	0	0
SNV:-8C,2C	0	0	0	0	0	0	1	0	0
SNV:-16T,-10T	0	0	0	0	0	0	1	0	0
SNV:-13C,-10T,-8T	0	0	0	0	0	0	1	0	0
SNV:-16T,-8C,4C	0	0	0	0	0	0	1	0	0
SNV:-11A,-5T,2G,6T	0	0	0	0	0	0	1	0	0
SNV:-5A,-3A,6T	0	0	0	0	0	0	1	0	0
SNV:-8C,1G	0	0	0	0	0	0	1	0	0
SNV:-12C,-6T,-4A	0	0	0	0	0	0	1	0	0
SNV:-16T,-1A	0	0	0	0	0	0	1	0	0
SNV:-2T,3A	0	0	0	0	0	0	1	0	0
SNV:-6A,3T	0	0	0	0	0	0	1	0	0
SNV:-9T,1T,2C	0	0	0	0	0	0	1	0	0
SNV:-15A,-12C,2G,4A,6T	0	0	0	0	0	0	1	0	0
SNV:-14A,-4T,-3T	0	0	0	0	0	0	1	0	0
SNV:-16C,-5T	0	0	0	0	0	0	1	0	0
SNV:-11C,-9C,-8C,2G,3C	0	0	0	0	0	0	1	0	0
SNV:-11C,-10C,-2C,1C	0	0	0	0	0	0	1	0	0
SNV:-11C,-7T,2G	0	0	0	0	0	0	1	0	0
SNV:1C,2G,4C	0	0	0	0	0	0	1	0	0
SNV:-11C,-10C,2G	0	0	0	0	0	0	1	0	0
SNV:-12C,1T,4G,5T	0	0	0	0	0	0	1	0	0
SNV:-16T,-9G,-8C	0	0	0	0	0	0	1	0	0
SNV:-17T,-15T	0	0	0	0	0	0	1	0	0
SNV:-6G,5C	0	0	0	0	0	0	1	0	0
SNV:-16C,-10T,-9G,-2G,4A,5C	0	0	0	0	0	0	1	0	0
SNV:-13A,-6G	0	0	0	0	0	0	1	0	0
SNV:-16T,-1G,2C	0	0	0	0	0	0	1	0	0
SNV:-11C,-5T,4A	0	0	0	0	0	0	1	0	0
SNV:-16T,-2C	0	0	0	0	0	0	1	0	0
SNV:-9T,-3T	0	0	0	0	0	0	1	0	0
SNV:-17A,-11C,-10C	0	0	0	0	0	0	1	0	0
SNV:-11C,-9G,-2G,-1A,4A	0	0	0	0	0	0	1	0	0
SNV:5C,6C	0	0	0	0	0	0	1	0	0
SNV:-9T,-5A,1T,2C	0	0	0	0	0	0	1	0	0
SNV:-17T,-9T,4C	0	0	0	0	0	0	1	0	0
SNV:-11C,-5A	0	0	0	0	0	0	1	0	0
SNV:-17A,-16T,-10A,-9G,3T,5T	0	0	0	0	0	0	1	0	0
SNV:-12G,-3T	0	0	0	0	0	0	1	0	0
SNV:-5T,-3T,3C	0	0	0	0	0	0	1	0	0
SNV:5T,6T	0	0	0	0	0	0	1	0	0
SNV:-11G,-3A	0	0	0	0	0	0	1	0	0
SNV:-9G,-2G	0	0	0	0	0	0	1	0	0
SNV:-17A,-12T	0	0	0	0	0	0	1	0	0
SNV:-10T,-2G	0	0	0	0	0	0	0	1	0
SNV:-15A,-14G,-13T	0	0	0	0	0	0	0	1	0
SNV:-6A,-1G	0	0	0	0	0	0	0	1	0
SNV:-10T,-9G,3T	0	0	0	0	0	0	0	1	0
SNV:-14C,-11G,4G,5C	0	0	0	0	0	0	0	1	0
SNV:-9T,-7T	0	0	0	0	0	0	0	1	0
SNV:-17T,-10T,-5G	0	0	0	0	0	0	0	1	0
SNV:-1A,2A,3A	0	0	0	0	0	0	0	1	0
SNV:-16T,2G	0	0	0	0	0	0	0	1	0
SNV:-11C,-6G,-3T,4A	0	0	0	0	0	0	0	1	0
SNV:-13T,-4T,2G	0	0	0	0	0	0	0	1	0
SNV:-16A,-6T,-4T,-3T,-2C	0	0	0	0	0	0	0	1	0
SNV:-8C,-4A	0	0	0	0	0	0	0	1	0
SNV:-13A,-3T,-1A,4G	0	0	0	0	0	0	0	1	0
SNV:-6A,-5T,-3T	0	0	0	0	0	0	0	1	0
SNV:-10A,-7C,1T	0	0	0	0	0	0	0	1	0
SNV:-2G,-1A,6C	0	0	0	0	0	0	0	1	0
SNV:-11C,-7C,4C	0	0	0	0	0	0	0	1	0
SNV:-13T,-5G,3T	0	0	0	0	0	0	0	1	0
SNV:-17T,-14C,5C	0	0	0	0	0	0	0	1	0
SNV:-15G,-13A,-10T,-9G,-1A	0	0	0	0	0	0	0	1	0
SNV:-16T,-6G	0	0	0	0	0	0	0	1	0
SNV:-16C,-11C,-10C,2G,4G	0	0	0	0	0	0	0	1	0
SNV:-15A,-11C,-7C,5A	0	0	0	0	0	0	0	1	0
SNV:-16C,-10C,-4C,4G	0	0	0	0	0	0	0	1	0
SNV:-13A,-4A,-3G,-1G,1C	0	0	0	0	0	0	0	1	0
SNV:-16C,-9C,4C	0	0	0	0	0	0	0	1	0
SNV:-15A,-8A,-7C,-5A,-4A,-1G,4C	0	0	0	0	0	0	0	1	0
SNV:-12C,-5G	0	0	0	0	0	0	0	1	0
SNV:-5G,-1G,4C	0	0	0	0	0	0	0	1	0
SNV:-16T,-13A,-1G,2G	0	0	0	0	0	0	0	1	0
SNV:-14G,-13C,-10T	0	0	0	0	0	0	0	1	0
SNV:2C,3C	0	0	0	0	0	0	0	1	0
SNV:-15G,-9G,3A	0	0	0	0	0	0	0	1	0
SNV:-7C,4A,5A	0	0	0	0	0	0	0	1	0
SNV:-14C,-11A,-6G,-2C,1T	0	0	0	0	0	0	0	1	0
SNV:-6A,3C	0	0	0	0	0	0	0	1	0
SNV:-9T,-2C,2C,3A	0	0	0	0	0	0	0	1	0
SNV:-9C,-3T	0	0	0	0	0	0	0	1	0
SNV:-1A,2G,3C	0	0	0	0	0	0	0	1	0
SNV:-16C,-10C,-4C	0	0	0	0	0	0	0	1	0
SNV:-13T,-2T,-1G,3A	0	0	0	0	0	0	0	1	0
SNV:-15T,-13T,-9G,-3T,-1G,1G,2G	0	0	0	0	0	0	0	1	0
SNV:-13T,-3T,2G	0	0	0	0	0	0	0	1	0
SNV:-11C,-9G,-8C,-1G,1G,4A	0	0	0	0	0	0	0	1	0
SNV:-11C,-2C,2C	0	0	0	0	0	0	0	1	0
SNV:-16A,-14C	0	0	0	0	0	0	0	1	0
SNV:-7C,3C,4A	0	0	0	0	0	0	0	1	0
SNV:-15A,-14G,-12G,-6G,-2C,1C,3A,4A	0	0	0	0	0	0	0	1	0
SNV:-17T,-5T,6C	0	0	0	0	0	0	0	1	0
SNV:-14G,1T,2C,3C,4A,6C	0	0	0	0	0	0	0	1	0
SNV:-11C,-8C,-7C,1G,2G	0	0	0	0	0	0	0	1	0
SNV:-12C,-10T	0	0	0	0	0	0	0	1	0
SNV:-16C,-11C,-10C,1G,2G	0	0	0	0	0	0	0	1	0
SNV:-16A,-2T,4C	0	0	0	0	0	0	0	1	0
SNV:-5A,-3A,-1G,2G	0	0	0	0	0	0	0	1	0
SNV:-16C,-15T	0	0	0	0	0	0	0	1	0
SNV:3A,6C	0	0	0	0	0	0	0	1	0
SNV:-17C,-15G,5T	0	0	0	0	0	0	0	1	0
SNV:-15T,-9C,-6G,-4T	0	0	0	0	0	0	0	1	0
SNV:-16A,-13T,-12T,-11G,-9T,-5A,2G	0	0	0	0	0	0	0	1	0
SNV:-16T,-11C,4G	0	0	0	0	0	0	0	1	0
SNV:-7T,-3T	0	0	0	0	0	0	0	1	0
SNV:-17T,-16T,-12G,-8C,-6A,-3T,-2T,5A	0	0	0	0	0	0	0	1	0
SNV:-5G,2A,4G	0	0	0	0	0	0	0	1	0
SNV:-16C,-14G,-5G,2G,4G	0	0	0	0	0	0	0	1	0
SNV:-6G,6C	0	0	0	0	0	0	0	1	0
SNV:-8T,-5T,2A,6T	0	0	0	0	0	0	0	1	0
SNV:3T,4A	0	0	0	0	0	0	0	1	0
SNV:1C,3T,4C,5T	0	0	0	0	0	0	0	1	0
SNV:-11C,1T,4G	0	0	0	0	0	0	0	1	0
SNV:-6T,-5G	0	0	0	0	0	0	0	1	0
SNV:-9T,-6G,-3G,2C	0	0	0	0	0	0	0	1	0
SNV:-2T,3A,4G	0	0	0	0	0	0	0	1	0
SNV:-14C,-11A,-9G,-6G,-3A,2A	0	0	0	0	0	0	0	1	0
SNV:-14C,-9T,-8T,-4C	0	0	0	0	0	0	0	1	0
SNV:-11C,-5T,2C,4A,6C	0	0	0	0	0	0	0	1	0
SNV:-1G,1C,2G	0	0	0	0	0	0	0	1	0
SNV:-11C,2C,3C	0	0	0	0	0	0	0	1	0
SNV:-17A,3A,4G	0	0	0	0	0	0	0	1	0
SNV:-13A,-2T,1T,4G	0	0	0	0	0	0	0	1	0
SNV:-13T,-11C,-7C	0	0	0	0	0	0	0	1	0
SNV:-17T,-6T,-4T	0	0	0	0	0	0	0	1	0
SNV:-9C,3A	0	0	0	0	0	0	0	1	0
SNV:-1A,1C	0	0	0	0	0	0	0	1	0
SNV:-2G,3A	0	0	0	0	0	0	0	1	0
SNV:-9T,-1T	0	0	0	0	0	0	0	0	1
SNV:-1G,1C,5A	0	0	0	0	0	0	0	0	1
SNV:-14A,-12T	0	0	0	0	0	0	0	0	1
SNV:-15A,5C	0	0	0	0	0	0	0	0	1
SNV:-15A,-10T,-8C	0	0	0	0	0	0	0	0	1
SNV:-15A,-6G,-4T,4A	0	0	0	0	0	0	0	0	1
SNV:-5A,-3G,2A	0	0	0	0	0	0	0	0	1
SNV:-6A,-5G	0	0	0	0	0	0	0	0	1
SNV:-5T,-1G,1C,4C	0	0	0	0	0	0	0	0	1
SNV:-17T,-16T,-15T,-13A	0	0	0	0	0	0	0	0	1
SNV:-10T,3T,6C	0	0	0	0	0	0	0	0	1
SNV:-17A,-15A,-6A,2A,5T	0	0	0	0	0	0	0	0	1
SNV:-6G,-5G,-3T,2C	0	0	0	0	0	0	0	0	1
SNV:-15G,-9G,-2C	0	0	0	0	0	0	0	0	1
SNV:-1G,2C,4C,5C	0	0	0	0	0	0	0	0	1
SNV:-16C,-5G	0	0	0	0	0	0	0	0	1
SNV:-5G,4A	0	0	0	0	0	0	0	0	1
SNV:-17C,2C	0	0	0	0	0	0	0	0	1
SNV:-14A,-13C,-5T,-1G	0	0	0	0	0	0	0	0	1
SNV:-5T,-1G,1C	0	0	0	0	0	0	0	0	1
SNV:-6T,-5G,-2T,-1G	0	0	0	0	0	0	0	0	1
SNV:-16C,-11C,-8C,1G,2G	0	0	0	0	0	0	0	0	1
SNV:-13A,-12T,-9T,-2T	0	0	0	0	0	0	0	0	1
SNV:-16T,-5T,3T,6C	0	0	0	0	0	0	0	0	1
SNV:-9G,-5T,2G	0	0	0	0	0	0	0	0	1
SNV:-12G,-11C,-6G,-2C	0	0	0	0	0	0	0	0	1
SNV:3T,4C	0	0	0	0	0	0	0	0	1
SNV:-14G,4C	0	0	0	0	0	0	0	0	1
SNV:-13A,-4C,6C	0	0	0	0	0	0	0	0	1
SNV:-13T,-11C,-4C,1T,3A	0	0	0	0	0	0	0	0	1
SNV:-5T,-2T	0	0	0	0	0	0	0	0	1
SNV:-9C,-6G	0	0	0	0	0	0	0	0	1
SNV:-1T,4G,5A	0	0	0	0	0	0	0	0	1
SNV:-10A,-1G,1C	0	0	0	0	0	0	0	0	1
SNV:-14G,-11G	0	0	0	0	0	0	0	0	1
SNV:-10T,-5G	0	0	0	0	0	0	0	0	1
SNV:-15A,-3A,-1G,1C	0	0	0	0	0	0	0	0	1
SNV:-9G,-8C,-7C,2G	0	0	0	0	0	0	0	0	1
SNV:-15A,-12G,-4T,1T	0	0	0	0	0	0	0	0	1
SNV:-17T,-2T	0	0	0	0	0	0	0	0	1
SNV:-13T,-1G,4G	0	0	0	0	0	0	0	0	1
SNV:-11G,-9G,2G	0	0	0	0	0	0	0	0	1
SNV:-4C,2C	0	0	0	0	0	0	0	0	1
SNV:-9C,-2G	0	0	0	0	0	0	0	0	1
SNV:-15A,-1G,1C	0	0	0	0	0	0	0	0	1
SNV:-16T,-5G,2G	0	0	0	0	0	0	0	0	1
SNV:-14G,-11G,-6T,-4T	0	0	0	0	0	0	0	0	1
SNV:-13C,1T	0	0	0	0	0	0	0	0	1
SNV:2A,5T	0	0	0	0	0	0	0	0	1
SNV:-3A,6T	0	0	0	0	0	0	0	0	1
SNV:-16C,-15A,-1A	0	0	0	0	0	0	0	0	1
SNV:-7T,6T	0	0	0	0	0	0	0	0	1
SNV:-16T,-11C,-3T	0	0	0	0	0	0	0	0	1
SNV:-17T,-16C,-9C,-6G	0	0	0	0	0	0	0	0	1
SNV:-5G,-1G,1C	0	0	0	0	0	0	0	0	1
SNV:-17C,-13A,-9G	0	0	0	0	0	0	0	0	1
SNV:-16T,-1G,1C	0	0	0	0	0	0	0	0	1
SNV:-11C,-9G,-8C,-2G,3C,4A	0	0	0	0	0	0	0	0	1
SNV:-15T,-9G,3T	0	0	0	0	0	0	0	0	1
SNV:-13A,-12G,-4C	0	0	0	0	0	0	0	0	1
SNV:-13A,1G	0	0	0	0	0	0	0	0	1
SNV:-14C,-1G,1C	0	0	0	0	0	0	0	0	1
SNV:-13A,-9T,-1T	0	0	0	0	0	0	0	0	1
SNV:-1T,4G	0	0	0	0	0	0	0	0	1
SNV:-8C,6C	0	0	0	0	0	0	0	0	1
SNV:-2T,-1G,3A	0	0	0	0	0	0	0	0	1
SNV:-13C,-11C,-4C,2G	0	0	0	0	0	0	0	0	1
SNV:-9C,-4T,6T	0	0	0	0	0	0	0	0	1
SNV:-10T,-5G,-1G,4G	0	0	0	0	0	0	0	0	1
SNV:-9T,-2T,4C	0	0	0	0	0	0	0	0	1
SNV:-1G,1C,5T	0	0	0	0	0	0	0	0	1
SNV:-13T,-5A,-4T,-1T,6T	0	0	0	0	0	0	0	0	1
SNV:-15A,-11C	0	0	0	0	0	0	0	0	1
SNV:-16C,-11C,-2T,2G,3A,4G	0	0	0	0	0	0	0	0	1
SNV:-5T,-1G,4C	0	0	0	0	0	0	0	0	1
SNV:-1G,1C,3T	0	0	0	0	0	0	0	0	1
SNV:-4T,-1G,1C	0	0	0	0	0	0	0	0	1
SNV:-16T,-12C	0	0	0	0	0	0	0	0	1
SNV:-17T,-13C,1T	0	0	0	0	0	0	0	0	1
SNV:-13C,-7C	0	0	0	0	0	0	0	0	1
SNV:-16C,-11C,-7C,5A	0	0	0	0	0	0	0	0	1
-8:12D	3	584	193	0	748	297	1	554	203
-12:12D	4	452	141	0	717	158	2	507	209
-6:15D	0	60	36	1	148	35	0	110	29
-1:1I	0	44	42	0	121	57	0	87	63
-3:16D	0	75	28	1	130	34	2	85	50
-3:12D	0	60	16	0	103	36	0	112	36
-3:2D	0	52	42	0	69	43	0	72	46
-3:3D	0	21	16	0	40	31	0	36	28
-3:10D	0	37	6	0	55	20	0	33	10
-1:13D	0	45	8	0	45	12	0	31	17
-7:18D	0	28	5	0	48	34	0	31	4
-6:25D	0	24	2	0	46	0	0	36	10
1:1I	0	12	1	0	22	34	0	22	14
-1:1D	0	17	9	0	30	19	0	13	6
-23:26D	0	20	10	0	30	8	0	19	4
1:12D	0	11	0	0	24	22	0	6	3
-7:9D	0	20	2	0	31	5	0	5	2
-1:12D	0	21	5	0	23	0	0	11	0
5:1D	3	10	3	10	8	5	6	12	2
-4:2I	0	15	0	0	18	14	0	7	4
-1:7D	0	6	8	0	13	4	0	20	3
1:2D	0	10	5	0	8	4	2	16	8
1:2I	0	5	1	0	27	12	0	3	4
-9:9D	0	4	5	0	13	0	0	16	10
-7:15D	0	0	6	0	19	1	0	11	7
-7:28D	0	12	9	0	11	1	0	5	5
-9:1D	2	2	4	4	9	7	5	7	2
-18:21D	0	17	0	0	11	0	0	13	0
-4:9D	0	2	12	0	14	3	0	5	5
-8:11D	0	7	0	0	17	9	0	5	0
-17:1D	2	5	6	8	3	2	9	0	2
1:1D	0	0	5	0	11	2	0	9	8
-3:18D	0	1	0	0	9	6	0	7	6
-5:4D	0	0	3	0	8	0	0	8	10
1:6D	0	3	5	0	2	5	0	7	5
-16:27D	0	0	5	0	13	0	0	7	2
-2:1D	0	11	0	0	9	0	0	5	0
-9:17D	0	16	0	0	8	0	0	0	0
-2:6D	0	3	0	0	16	0	0	1	4
-2:3D	0	1	0	0	3	7	0	8	5
-3:2I	0	0	5	0	2	8	0	8	1
-1:2I	0	0	3	0	13	0	0	1	7
-1:14D	0	0	0	0	14	1	0	3	5
-21:32D	0	8	0	0	12	0	0	0	1
-12:26D	0	12	3	0	0	0	0	4	2
-1:4D	0	7	0	0	4	0	0	7	2
-1:3I	0	2	0	0	9	0	0	9	0
1:9I	0	7	5	0	1	0	0	2	5
-12:11D	0	6	5	0	0	5	0	2	0
6:6D	0	6	0	0	1	0	0	7	4
-15:31D	0	5	1	0	3	0	0	6	3
6:6I	0	0	1	0	6	6	0	4	1
-13:24D	0	0	2	0	3	10	0	1	2
-24:24D	0	0	0	0	14	0	0	4	0
-1:6D	0	0	0	0	7	0	0	11	0
-8:1D	1	0	2	2	3	5	0	0	4
1:12I	0	17	0	0	0	0	0	0	0
1:7I	0	6	0	0	9	0	0	2	0
-6:36D	0	10	0	0	5	0	0	2	0
-11:14D	0	1	4	0	3	6	0	3	0
-8:8D	0	0	3	0	0	6	0	5	3
-6:6D	0	0	0	0	7	5	0	3	2
1:21I	0	0	0	0	11	5	0	0	0
-1:25I	0	0	0	0	0	6	0	6	4
-1:4I	0	0	5	0	0	0	0	8	2
1:4D	0	0	2	0	6	2	0	4	1
-6:8D	0	0	0	0	11	0	0	4	0
-16:37D	0	0	0	0	5	0	0	10	0
-1:11D	0	0	0	0	6	0	0	9	0
-8:13D	0	0	0	0	8	0	0	4	3
-43:48D	0	0	0	0	7	4	0	4	0
-4:7D	0	11	0	0	0	3	0	0	0
3:3D	0	6	0	0	5	0	0	2	1
-9:42D	0	5	0	0	7	0	0	2	0
-15:14D	0	0	6	0	5	2	0	1	0
-10:9D	0	0	0	0	7	0	0	2	5
1:3D	0	0	0	0	7	2	0	4	1
-6:21D	0	3	0	0	5	0	0	5	0
-20:29D	0	2	0	0	7	4	0	0	0
-1:20D	0	3	0	0	3	0	0	6	1
-9:23D	0	4	0	0	0	0	0	9	0
-12:10D	0	0	0	0	10	0	0	0	3
-17:28D	0	11	0	0	0	0	0	1	0
-5:4D,3:6D	0	12	0	0	0	0	0	0	0
-9:19D	0	12	0	0	0	0	0	0	0
-8:1I,-4:2I	0	4	0	0	0	0	0	8	0
-1:29I	0	0	4	0	0	0	0	7	1
-1:3D	0	0	3	0	1	0	0	5	3
-1:20I	0	0	5	0	2	0	0	5	0
-6:5D	0	0	0	0	9	0	0	3	0
-8:10D	0	0	0	0	7	0	0	5	0
-13:10I,-8:11D	0	11	0	0	0	0	0	0	0
1:5D	0	3	2	0	3	2	0	0	1
1:3I	0	0	1	0	6	0	0	4	0
-7:8D,4:1D	0	0	0	0	0	11	0	0	0
1:52I	0	10	0	0	0	0	0	0	0
-11:29D	0	8	0	0	2	0	0	0	0
1:2I,4:1I	0	10	0	0	0	0	0	0	0
-5:2D	0	1	0	0	4	0	1	4	0
-11:11D	0	1	0	0	6	0	0	3	0
-12:20D	0	0	5	0	0	0	0	4	1
-1:21D	0	0	1	0	9	0	0	0	0
-4:28I	0	9	0	0	0	0	0	0	0
-8:8D,4:1D	0	9	0	0	0	0	0	0	0
2:3D	0	5	0	0	4	0	0	0	0
-2:5D	0	8	1	0	0	0	0	0	0
-18:17D	0	9	0	0	0	0	0	0	0
3:4I	0	1	8	0	0	0	0	0	0
-5:6D	0	5	4	0	0	0	0	0	0
-1:10I	0	7	0	0	0	0	0	2	0
-1:14I	0	0	5	0	2	0	0	2	0
-13:13D	0	0	3	0	6	0	0	0	0
-14:15D	0	0	0	0	8	0	0	1	0
3:15I	0	0	0	0	9	0	0	0	0
1:9D	0	0	0	0	4	0	0	5	0
-1:9I	0	0	0	0	5	0	0	4	0
-1:8D	0	0	0	0	4	4	0	1	0
-6:1D	2	0	1	0	1	1	3	0	0
-1:9D	0	5	0	0	1	0	0	0	2
-9:25D	0	8	0	0	0	0	0	0	0
-21:42D	0	4	0	0	1	0	0	3	0
-10:54D	0	8	0	0	0	0	0	0	0
1:10I,4:26I	0	0	8	0	0	0	0	0	0
-13:18D	0	0	5	0	1	0	0	0	2
-20:19D	0	0	4	0	0	4	0	0	0
-10:15D	0	0	3	0	3	0	0	2	0
-9:20D	0	0	0	0	7	0	0	0	1
-1:28I	0	0	0	0	0	8	0	0	0
-15:13D	0	0	0	0	0	8	0	0	0
-3:19D	0	0	0	0	0	0	0	6	2
-2:7D	0	0	0	0	0	0	0	0	8
-25:27D	1	0	0	0	2	0	0	2	2
-1:19D	0	3	0	0	4	0	0	0	0
-5:23I,-1:14I	0	7	0	0	0	0	0	0	0
-16:43D	0	7	0	0	0	0	0	0	0
-37:52D	0	7	0	0	0	0	0	0	0
-17:41D	0	4	0	0	0	0	0	3	0
-11:4I,-9:9I,-5:4D,3:4I	0	7	0	0	0	0	0	0	0
-9:7D	0	4	1	0	0	0	0	2	0
6:1I	0	0	2	0	0	0	0	5	0
-1:97I,2:2I	0	0	7	0	0	0	0	0	0
-4:1I	0	0	0	0	5	0	0	1	1
-20:22D	0	0	0	0	7	0	0	0	0
6:63I	0	0	0	0	7	0	0	0	0
-32:38D	0	0	0	0	1	0	0	4	2
-1:23D	0	0	0	0	4	0	0	3	0
-15:35D	0	0	0	0	0	6	0	0	1
-1:36I	0	0	0	0	0	5	0	0	2
-24:38D	0	0	0	0	0	7	0	0	0
-4:11I	0	0	0	0	0	5	0	0	2
-5:2I,-4:1D	0	0	0	0	0	0	0	7	0
-1:17D	0	0	0	0	0	0	0	3	4
-22:14D,-1:8I,4:1D	0	0	0	0	0	0	0	7	0
1:19I	0	3	0	0	2	0	0	0	1
1:6I	0	3	0	0	0	0	0	3	0
5:48I	0	6	0	0	0	0	0	0	0
-2:4D	0	6	0	0	0	0	0	0	0
-6:19D	0	4	0	0	0	0	0	2	0
-4:1I,-3:3D	0	4	2	0	0	0	0	0	0
-41:47D	0	6	0	0	0	0	0	0	0
-47:52D	0	3	0	0	0	0	0	3	0
-28:15D,-1:6D	0	6	0	0	0	0	0	0	0
-7:17I,1:5I	0	6	0	0	0	0	0	0	0
-7:17D	0	1	0	0	5	0	0	0	0
-2:1I	0	1	0	0	2	0	0	2	1
-3:5D,5:4I	0	0	6	0	0	0	0	0	0
-1:78I	0	0	6	0	0	0	0	0	0
-3:35I	0	0	6	0	0	0	0	0	0
2:2D	0	0	1	0	1	2	1	1	0
-19:22D	0	0	0	0	6	0	0	0	0
-2:1D,3:13D	0	0	0	0	5	0	0	0	1
-1:12I	0	0	0	0	3	0	0	3	0
-7:7D	0	0	0	0	3	0	0	0	3
-4:52D	0	0	0	0	4	0	0	2	0
-15:28D	0	0	0	0	6	0	0	0	0
-1:14I,2:14I	0	0	0	0	0	6	0	0	0
-7:11D	0	0	0	0	0	4	0	2	0
-1:1I,3:5D	0	0	0	0	0	0	0	6	0
-4:6D	0	0	0	0	0	0	0	6	0
-8:27D	0	0	0	0	0	0	0	2	4
-14:54D	0	0	0	0	0	0	0	0	6
-7:3D	1	0	0	0	2	0	0	1	1
-3:26D	0	4	0	0	0	0	0	1	0
-1:11I	0	1	0	0	2	0	0	2	0
-4:4I,1:6D	0	5	0	0	0	0	0	0	0
-10:21D	0	5	0	0	0	0	0	0	0
-3:4I	0	5	0	0	0	0	0	0	0
-9:41D	0	5	0	0	0	0	0	0	0
-9:8D,5:6D	0	5	0	0	0	0	0	0	0
-11:23D	0	5	0	0	0	0	0	0	0
-6:10D	0	3	0	0	0	2	0	0	0
-11:31D	0	1	0	0	0	2	0	2	0
-7:6D	0	1	0	0	4	0	0	0	0
-17:24D	0	0	4	0	0	0	0	0	1
-1:3I,6:9I	0	0	5	0	0	0	0	0	0
-12:49D	0	0	2	0	0	0	0	3	0
1:40I	0	0	4	0	0	0	0	0	1
-1:26I,2:2I	0	0	1	0	0	4	0	0	0
-1:22D	0	0	0	0	3	0	0	2	0
-1:7I,4:11D	0	0	0	0	5	0	0	0	0
-1:44I	0	0	0	0	5	0	0	0	0
-11:4D,-4:19I	0	0	0	0	5	0	0	0	0
-12:19D	0	0	0	0	5	0	0	0	0
-19:18D	0	0	0	0	5	0	0	0	0
-8:7I,3:4I	0	0	0	0	5	0	0	0	0
-11:16D	0	0	0	0	3	0	0	0	2
2:45I	0	0	0	0	5	0	0	0	0
-12:9I,-6:13I,1:11I	0	0	0	0	5	0	0	0	0
-4:31D	0	0	0	0	5	0	0	0	0
-11:34D	0	0	0	0	5	0	0	0	0
-4:1I,1:3D	0	0	0	0	5	0	0	0	0
-4:38I,1:14I	0	0	0	0	5	0	0	0	0
5:14I	0	0	0	0	5	0	0	0	0
-1:1I,4:17I,6:4I	0	0	0	0	5	0	0	0	0
-3:23I,2:2I	0	0	0	0	0	5	0	0	0
-25:32D	0	0	0	0	0	5	0	0	0
-3:7I,1:4D	0	0	0	0	0	5	0	0	0
-34:33D	0	0	0	0	0	5	0	0	0
-29:33D	0	0	0	0	0	5	0	0	0
-3:40D	0	0	0	0	0	0	0	5	0
-3:2D,4:9I	0	0	0	0	0	0	0	5	0
-42:62D	0	0	0	0	0	0	0	5	0
-12:7I,-6:8D	0	0	0	0	0	0	0	5	0
-33:45D	0	0	0	0	0	0	0	5	0
1:44I	0	0	0	0	0	0	0	5	0
-6:17D	0	0	0	0	0	0	0	5	0
-1:5I	0	0	0	0	0	0	0	3	2
4:1D	1	0	0	0	1	0	0	2	0
-4:1D	0	1	0	0	0	1	0	0	2
3:7D	0	4	0	0	0	0	0	0	0
-10:26D	0	4	0	0	0	0	0	0	0
-49:49D	0	4	0	0	0	0	0	0	0
-8:24D	0	4	0	0	0	0	0	0	0
-4:13D	0	1	0	0	0	0	0	3	0
-16:50D	0	0	4	0	0	0	0	0	0
-22:34D	0	0	4	0	0	0	0	0	0
5:1I	0	0	3	0	0	0	0	0	1
-19:16D	0	0	4	0	0	0	0	0	0
-17:22D	0	0	1	0	3	0	0	0	0
1:18I	0	0	3	0	0	0	0	1	0
-13:12D	0	0	2	0	1	0	0	0	1
-1:1I,2:5D	0	0	1	0	2	0	0	1	0
-3:15I	0	0	1	0	0	0	0	3	0
-1:1I,3:4D	0	0	0	0	4	0	0	0	0
1:18D	0	0	0	0	4	0	0	0	0
-3:26I,1:12I	0	0	0	0	4	0	0	0	0
-8:4D	0	0	0	0	4	0	0	0	0
-6:5D,6:6D	0	0	0	0	4	0	0	0	0
-3:2D,5:8D	0	0	0	0	4	0	0	0	0
-35:40D	0	0	0	0	4	0	0	0	0
6:42I	0	0	0	0	4	0	0	0	0
1:13I	0	0	0	0	4	0	0	0	0
-1:1I,2:10D	0	0	0	0	2	0	0	2	0
-7:7I,-6:8D	0	0	0	0	4	0	0	0	0
-1:11I,4:20I	0	0	0	0	4	0	0	0	0
-1:4D,6:3I	0	0	0	0	4	0	0	0	0
-12:23D	0	0	0	0	4	0	0	0	0
2:65I	0	0	0	0	4	0	0	0	0
-3:3D,4:1I	0	0	0	0	4	0	0	0	0
1:1I,2:23D	0	0	0	0	4	0	0	0	0
-3:1D	0	0	0	0	3	0	0	0	1
-7:50D	0	0	0	0	4	0	0	0	0
-14:13D	0	0	0	0	1	0	0	3	0
-25:36D	0	0	0	0	2	0	0	2	0
1:15D	0	0	0	0	1	0	0	1	2
-13:21D	0	0	0	0	0	4	0	0	0
5:2I	0	0	0	0	0	4	0	0	0
-14:40D	0	0	0	0	0	4	0	0	0
-9:11D	0	0	0	0	0	4	0	0	0
-3:1I,1:2I,4:1D	0	0	0	0	0	4	0	0	0
6:16I	0	0	0	0	0	1	0	0	3
5:27I	0	0	0	0	0	3	0	1	0
-11:18D	0	0	0	0	0	3	0	1	0
5:5D	0	0	0	0	0	0	0	4	0
-1:1I,5:2I	0	0	0	0	0	0	0	4	0
-1:15D	0	0	0	0	0	0	0	3	1
-3:1D,1:5I	0	0	0	0	0	0	0	4	0
-21:35D	0	0	0	0	0	0	0	4	0
-4:39D	0	0	0	0	0	0	0	4	0
-7:23D	0	0	0	0	0	0	0	1	3
-2:3I	0	0	0	0	0	0	0	3	1
1:1I,2:15D	0	0	0	0	0	0	0	4	0
-2:7I,4:1D	0	0	0	0	0	0	0	4	0
-11:17D	0	0	0	0	0	0	0	4	0
-10:10I,-6:8D	0	0	0	0	0	0	0	4	0
-16:12D	0	0	0	0	0	0	0	4	0
-1:24I	0	0	0	0	0	0	0	1	3
-3:13D	0	0	0	0	0	0	0	0	4
-8:19D	0	0	0	0	0	0	0	0	4
6:9I	0	0	0	0	0	0	0	0	4
-16:32D	0	0	0	0	0	0	0	0	4
4:10I	0	0	0	0	0	0	0	0	4
-1:1I,1:2D	0	0	0	0	0	0	0	0	4
-8:13I,-1:16I,4:1D	0	0	0	0	0	0	0	0	4
6:3I	0	0	0	0	0	0	0	0	4
5:18I	0	0	0	0	0	0	0	0	4
-1:42I	0	0	0	0	0	0	0	0	4
-27:60D	0	0	0	0	0	0	0	0	4
-16:15D	0	3	0	0	0	0	0	0	0
-12:14D	0	3	0	0	0	0	0	0	0
3:4I,6:4D	0	2	0	0	1	0	0	0	0
-1:1D,5:1D	0	3	0	0	0	0	0	0	0
-8:33D	0	0	3	0	0	0	0	0	0
-19:47D	0	0	3	0	0	0	0	0	0
-6:23D	0	0	3	0	0	0	0	0	0
-23:29D	0	0	3	0	0	0	0	0	0
1:15I	0	0	3	0	0	0	0	0	0
6:22I	0	0	3	0	0	0	0	0	0
-7:40D	0	0	3	0	0	0	0	0	0
-1:15I	0	0	2	0	0	0	0	1	0
-1:52I,2:2I	0	0	2	0	1	0	0	0	0
3:27I	0	0	3	0	0	0	0	0	0
-13:1D	0	0	1	0	1	0	1	0	0
-2:1D,1:8I	0	0	3	0	0	0	0	0	0
-9:8D	0	0	3	0	0	0	0	0	0
-15:22D	0	0	1	0	0	2	0	0	0
-1:14I,2:11I	0	0	0	0	3	0	0	0	0
-15:9I,-4:1D,-1:7I	0	0	0	0	3	0	0	0	0
-13:37D	0	0	0	0	1	2	0	0	0
-2:39D	0	0	0	0	3	0	0	0	0
1:17I	0	0	0	0	3	0	0	0	0
-1:6I	0	0	0	0	3	0	0	0	0
-19:20D	0	0	0	0	3	0	0	0	0
-20:38D	0	0	0	0	3	0	0	0	0
-11:37D	0	0	0	0	3	0	0	0	0
-2:53D	0	0	0	0	3	0	0	0	0
3:1D,5:4I	0	0	0	0	3	0	0	0	0
-5:4D,3:7D	0	0	0	0	3	0	0	0	0
-1:5D	0	0	0	0	3	0	0	0	0
-37:46D	0	0	0	0	3	0	0	0	0
-1:66I	0	0	0	0	3	0	0	0	0
-22:27D	0	0	0	0	3	0	0	0	0
-46:55D	0	0	0	0	3	0	0	0	0
-4:5D	0	0	0	0	3	0	0	0	0
-28:48D	0	0	0	0	3	0	0	0	0
6:12I	0	0	0	0	3	0	0	0	0
-7:31D	0	0	0	0	3	0	0	0	0
-2:69I	0	0	0	0	2	0	0	1	0
-9:22D	0	0	0	0	3	0	0	0	0
-4:17I	0	0	0	0	0	3	0	0	0
1:16I	0	0	0	0	0	3	0	0	0
-1:2I,2:3D	0	0	0	0	0	3	0	0	0
-22:43D	0	0	0	0	0	0	0	3	0
-6:1I,-3:5D	0	0	0	0	0	0	0	3	0
2:19D	0	0	0	0	0	0	0	3	0
-2:4I,2:4D	0	0	0	0	0	0	0	3	0
-1:7I	0	0	0	0	0	0	0	3	0
-8:37I,-4:2I	0	0	0	0	0	0	0	3	0
2:69I	0	0	0	0	0	0	0	3	0
-38:53D	0	0	0	0	0	0	0	3	0
-4:44D	0	0	0	0	0	0	0	3	0
-1:10I,2:2I	0	0	0	0	0	0	0	3	0
-22:7D,-8:13D	0	0	0	0	0	0	0	3	0
-4:17I,-2:1D,6:8I	0	0	0	0	0	0	0	3	0
-4:19I	0	0	0	0	0	0	0	3	0
3:11I	0	0	0	0	0	0	0	3	0
5:7I	0	0	0	0	0	0	0	3	0
-1:4I,4:5D	0	0	0	0	0	0	0	3	0
-5:4D,3:5I	0	0	0	0	0	0	0	3	0
1:20I,6:25I	0	0	0	0	0	0	0	3	0
5:90I	0	0	0	0	0	0	0	3	0
-1:3D,6:43I	0	0	0	0	0	0	0	3	0
-2:5I,3:2I	0	0	0	0	0	0	0	0	3
-10:24D	0	0	0	0	0	0	0	0	3
6:13I	0	0	0	0	0	0	0	0	3
-4:24I	0	0	0	0	0	0	0	0	3
-1:38I,2:2I	0	0	0	0	0	0	0	0	3
1:19D	0	0	0	0	0	0	0	0	3
-12:2D,1:4I	0	0	0	0	0	0	0	0	3
-7:34D	0	0	0	0	0	0	0	0	3
5:26I	0	0	0	0	0	0	0	0	3
5:15I	0	0	0	0	0	0	0	0	3
-20:20D	0	0	0	0	0	0	0	0	3
3:5I,5:1D	0	0	0	0	0	0	0	0	3
-44:54D	0	2	0	0	0	0	0	0	0
1:27I	0	2	0	0	0	0	0	0	0
-5:3I,1:3D,6:1I	0	2	0	0	0	0	0	0	0
3:1I	0	2	0	0	0	0	0	0	0
-2:1I,-1:3D	0	2	0	0	0	0	0	0	0
-43:55D	0	1	0	0	0	0	0	0	1
6:5I	0	2	0	0	0	0	0	0	0
-10:1D	0	1	0	0	0	0	0	1	0
4:12I	0	2	0	0	0	0	0	0	0
-14:3D,-5:4D	0	2	0	0	0	0	0	0	0
-4:36I	0	0	2	0	0	0	0	0	0
-5:9I,-3:5D	0	0	2	0	0	0	0	0	0
-5:6D,4:1I	0	0	2	0	0	0	0	0	0
-5:20D	0	0	2	0	0	0	0	0	0
-1:23I,2:2I	0	0	2	0	0	0	0	0	0
1:73I	0	0	2	0	0	0	0	0	0
-18:19D	0	0	2	0	0	0	0	0	0
-1:1I,1:6D	0	0	2	0	0	0	0	0	0
1:5I,6:17I	0	0	2	0	0	0	0	0	0
-4:25I	0	0	2	0	0	0	0	0	0
2:1D	0	0	1	0	1	0	0	0	0
-15:23D	0	0	2	0	0	0	0	0	0
1:31I	0	0	2	0	0	0	0	0	0
-4:10I	0	0	1	0	0	0	0	0	1
-9:55D	0	0	0	0	2	0	0	0	0
3:14D	0	0	0	0	2	0	0	0	0
-6:29I,-1:1D	0	0	0	0	2	0	0	0	0
-20:39D	0	0	0	0	2	0	0	0	0
-24:23D	0	0	0	0	2	0	0	0	0
-20:36D	0	0	0	0	2	0	0	0	0
-12:27D	0	0	0	0	2	0	0	0	0
-5:6I,1:4D	0	0	0	0	2	0	0	0	0
-14:32D	0	0	0	0	2	0	0	0	0
-2:20D	0	0	0	0	2	0	0	0	0
-18:9D,1:12D	0	0	0	0	2	0	0	0	0
-16:18D	0	0	0	0	1	0	0	0	1
-1:1I,4:34D	0	0	0	0	2	0	0	0	0
1:1D,4:5I	0	0	0	0	2	0	0	0	0
-6:32D	0	0	0	0	2	0	0	0	0
3:7I	0	0	0	0	2	0	0	0	0
-4:3I	0	0	0	0	2	0	0	0	0
-3:3D,3:27I	0	0	0	0	2	0	0	0	0
-4:14I,2:28I	0	0	0	0	2	0	0	0	0
-8:32D	0	0	0	0	2	0	0	0	0
1:5I,3:1I	0	0	0	0	2	0	0	0	0
-21:38D	0	0	0	0	2	0	0	0	0
1:4I	0	0	0	0	2	0	0	0	0
-32:37D	0	0	0	0	2	0	0	0	0
-1:1I,2:2D	0	0	0	0	2	0	0	0	0
1:29I	0	0	0	0	2	0	0	0	0
-44:43D	0	0	0	0	0	2	0	0	0
-8:20D	0	0	0	0	0	2	0	0	0
6:25I	0	0	0	0	0	1	0	0	1
-17:17D	0	0	0	0	0	2	0	0	0
-2:1D,1:23I	0	0	0	0	0	2	0	0	0
-38:44D	0	0	0	0	0	2	0	0	0
-15:1D	0	0	0	0	0	1	0	1	0
-6:13D	0	0	0	0	0	0	0	2	0
-44:51D	0	0	0	0	0	0	0	2	0
-3:3D,6:3I	0	0	0	0	0	0	0	2	0
-5:30D	0	0	0	0	0	0	0	2	0
-7:2I,-4:4I,1:2D	0	0	0	0	0	0	0	2	0
-34:52D	0	0	0	0	0	0	0	2	0
-1:21I	0	0	0	0	0	0	0	2	0
-1:90I	0	0	0	0	0	0	0	2	0
-6:2D,3:4D	0	0	0	0	0	0	0	2	0
1:23I	0	0	0	0	0	0	0	2	0
2:31I,4:1D	0	0	0	0	0	0	0	2	0
-14:13D,3:13D	0	0	0	0	0	0	0	2	0
-6:8D,5:6D	0	0	0	0	0	0	0	2	0
-1:26D	0	0	0	0	0	0	0	2	0
-2:3I,4:4I	0	0	0	0	0	0	0	2	0
-23:11D,-10:2D	0	0	0	0	0	0	0	2	0
-1:76I	0	0	0	0	0	0	0	2	0
-8:5I,-4:2I	0	0	0	0	0	0	0	2	0
-2:35D	0	0	0	0	0	0	0	2	0
-4:20I	0	0	0	0	0	0	0	2	0
-2:40I	0	0	0	0	0	0	0	2	0
-8:28D	0	0	0	0	0	0	0	2	0
-4:9I	0	0	0	0	0	0	0	2	0
3:52I	0	0	0	0	0	0	0	2	0
-15:24D	0	0	0	0	0	0	0	2	0
-1:92I	0	0	0	0	0	0	0	2	0
-3:9I	0	0	0	0	0	0	0	2	0
-1:3I,3:5D	0	0	0	0	0	0	0	2	0
-1:1I,2:4D	0	0	0	0	0	0	0	1	1
-2:14D	0	0	0	0	0	0	0	1	1
-53:37D	0	0	0	0	0	0	0	2	0
-5:23D	0	0	0	0	0	0	0	0	2
-29:40D	0	0	0	0	0	0	0	0	2
-17:25D	0	0	0	0	0	0	0	0	2
6:9D	0	0	0	0	0	0	0	0	2
-6:1I	0	0	0	0	0	0	0	0	2
-1:30I	0	0	0	0	0	0	0	0	2
-23:41D	0	0	0	0	0	0	0	0	2
-13:28D	0	0	0	0	0	0	0	0	2
-7:8D	0	0	0	0	0	0	0	0	2
-8:1I	0	0	0	0	0	0	0	0	2
-4:4I	0	0	0	0	0	0	0	0	2
-6:6D,4:4D	0	0	0	0	0	0	0	0	2
-2:8D	0	0	0	0	0	0	0	0	2
-14:11D,1:9D	0	0	0	0	0	0	0	0	2
5:73I	0	0	0	0	0	0	0	0	2
2:3I,5:39I	0	0	0	0	0	0	0	0	2
-3:5D	0	0	0	0	0	0	0	0	2
-25:24D	0	0	0	0	0	0	0	0	2
1:58I	0	0	0	0	0	0	0	0	2
-51:52D	0	0	0	0	0	0	0	0	2
-9:1I,-6:2D,-1:1I,4:5D	0	0	0	0	0	0	0	0	2
-1:46I	0	0	0	0	0	0	0	0	2
-5:11D	0	0	0	0	0	0	0	0	2
-5:4D,3:4I	1	0	0	0	0	0	0	0	0
-3:21D	0	1	0	0	0	0	0	0	0
-3:27D	0	1	0	0	0	0	0	0	0
-3:7D	0	1	0	0	0	0	0	0	0
-2:1D,3:1I	0	1	0	0	0	0	0	0	0
-5:4D,3:1I	0	1	0	0	0	0	0	0	0
-8:4I,-4:2I	0	1	0	0	0	0	0	0	0
4:3I,6:3D	0	1	0	0	0	0	0	0	0
-3:1I,-2:11D	0	1	0	0	0	0	0	0	0
-5:25I,-1:12I	0	1	0	0	0	0	0	0	0
-9:1I,-6:10D	0	1	0	0	0	0	0	0	0
-2:1I,3:3D	0	1	0	0	0	0	0	0	0
-18:17D,2:4D	0	1	0	0	0	0	0	0	0
2:27D	0	1	0	0	0	0	0	0	0
1:22D	0	1	0	0	0	0	0	0	0
-10:22D	0	0	1	0	0	0	0	0	0
6:57I	0	0	1	0	0	0	0	0	0
-12:28D	0	0	1	0	0	0	0	0	0
-2:1D,1:24I	0	0	1	0	0	0	0	0	0
6:19I	0	0	1	0	0	0	0	0	0
-4:37I	0	0	1	0	0	0	0	0	0
-6:2D	0	0	1	0	0	0	0	0	0
5:62I	0	0	1	0	0	0	0	0	0
5:25I	0	0	1	0	0	0	0	0	0
-16:3D	0	0	0	1	0	0	0	0	0
-3:1I	0	0	0	0	1	0	0	0	0
2:20I	0	0	0	0	1	0	0	0	0
-6:1I,-4:3D	0	0	0	0	1	0	0	0	0
-3:53I,3:16I	0	0	0	0	1	0	0	0	0
-8:5D,6:6D	0	0	0	0	1	0	0	0	0
-5:14I,2:28I	0	0	0	0	1	0	0	0	0
[truncated: 124 more rows]

## Sheet: Reporter_mutRFP-On_target
Sample	I.NT	I.RNP...65mer.unco...SpCas9.WT.	I.RNPD...65mer.coup...SpCas9.SNAP.	II.NT	II.RNP...65mer.unco...SpCas9.WT.	II.RNPD...65mer.coup...SpCas9.SNAP.	III.NT	III.RNP...65mer.unco...SpCas9.WT.	III.RNPD...65mer.coup...SpCas9.SNAP.
no variant	96200	86108	88193	71484	50594	59544	72075	58049	54322
Corrected: SNV:2T,3A	210	1403	5830	150	332	3284	65	249	2643
SNV:-15T	33	46	49	37	31	33	45	43	42
SNV:6T	34	36	46	34	34	44	39	32	31
SNV:5T	25	28	28	36	17	42	34	37	39
SNV:1T	19	28	21	24	21	23	26	25	22
SNV:4A	27	30	36	22	16	14	25	15	14
SNV:-14T	19	24	23	19	20	14	37	19	20
SNV:-9A	35	28	26	13	17	9	13	22	10
SNV:-7T	23	20	31	10	16	10	27	21	10
SNV:4T	20	15	24	15	18	6	18	18	13
SNV:5A	19	24	16	13	11	13	16	19	12
SNV:-5C	23	16	21	11	8	13	17	18	16
SNV:-3A	29	20	29	21	4	10	9	9	8
SNV:-12C	16	19	27	15	8	10	13	15	13
SNV:-15A	21	16	16	14	7	15	10	17	9
SNV:-13A	25	12	11	15	10	10	12	16	13
SNV:-8G	24	14	12	18	13	8	13	12	7
SNV:3C	14	20	13	10	10	9	14	17	7
SNV:-12G	4	6	21	6	11	16	14	12	12
SNV:-11G	8	23	8	14	5	13	8	10	12
SNV:-10A	18	13	19	14	4	9	14	2	5
SNV:2T	11	11	16	4	5	29	4	9	9
SNV:-4C	7	13	11	13	11	6	15	9	13
SNV:-16C	15	18	12	10	7	4	10	9	9
SNV:-11T	8	11	10	10	9	10	15	10	9
SNV:2A	14	14	12	9	3	10	13	5	8
SNV:6A	15	10	9	16	9	11	9	5	2
SNV:-14A	9	13	16	6	2	7	13	10	5
SNV:-6A	15	11	22	7	1	6	10	2	4
SNV:1A	7	27	8	8	4	12	4	2	5
SNV:-9T	9	10	8	4	3	6	8	17	8
SNV:-1C	8	6	6	7	5	11	9	7	14
SNV:3A	11	7	17	6	5	6	3	8	9
SNV:-4A,-2C,-1A	0	35	7	0	6	0	0	23	0
SNV:-13T	6	6	8	5	6	14	5	6	8
SNV:-4A	11	4	9	5	6	5	6	9	7
SNV:-2G	10	8	10	6	1	4	7	5	5
SNV:-10T	9	5	9	5	6	3	8	6	3
SNV:-3T	3	8	9	7	2	2	9	6	6
SNV:-16A	11	7	7	5	3	6	4	4	4
SNV:-1A	6	3	16	6	5	6	4	1	2
SNV:-2C	4	6	20	2	0	1	0	9	0
SNV:6C	3	6	5	2	2	6	5	5	2
SNV:-7A	8	3	6	4	1	5	3	1	3
SNV:-6T	3	1	7	6	1	1	5	4	3
SNV:-2T	4	7	0	1	3	4	1	5	5
SNV:-16G	7	4	1	1	2	5	2	3	3
SNV:-1G	7	14	2	1	1	1	0	2	0
SNV:-12C,-8T,-3T,2T,3A	0	9	3	5	1	0	1	7	1
SNV:5C	4	2	3	4	0	7	2	2	1
SNV:2G	3	4	3	4	2	3	1	1	3
SNV:-8T	0	3	4	3	3	2	4	2	3
SNV:1C	4	0	11	1	1	2	0	2	1
SNV:-15T,6T	1	1	4	1	1	5	1	5	2
SNV:-13G	2	4	4	1	1	4	1	1	1
SNV:-5G	1	2	2	2	0	1	1	4	2
SNV:-12A	1	5	2	2	0	2	1	1	1
SNV:1C,2A,3A,5C,6A	0	0	15	0	0	0	0	0	0
SNV:-5A,-4G,-3G,1C	0	0	0	0	0	0	0	15	0
SNV:-9G	1	4	2	1	0	1	2	2	1
SNV:-10G	1	2	2	1	1	2	2	3	0
SNV:-15C	1	0	2	0	3	1	5	2	0
SNV:2G,3G	0	14	0	0	0	0	0	0	0
SNV:-5A	2	1	4	2	1	1	0	0	2
SNV:-3T,-2T	0	0	7	0	0	0	0	0	6
SNV:-6G	3	2	0	1	0	2	1	3	0
SNV:-9A,2T,3A	0	0	2	0	0	1	0	0	9
SNV:1C,2A	0	0	0	0	0	0	0	0	12
SNV:-14C	4	1	1	2	2	0	1	0	0
SNV:-11C	2	1	2	0	0	2	1	0	2
SNV:4A,5A	0	10	0	0	0	0	0	0	0
SNV:-2T,2A,3C,4T	0	10	0	0	0	0	0	0	0
SNV:-7C	0	2	1	2	2	0	3	0	0
SNV:-3A,2T,3A	0	0	9	0	0	0	0	0	1
SNV:-3G	1	0	0	3	0	2	1	0	2
SNV:-6T,2T,3A	0	7	1	0	0	1	0	0	0
SNV:2G,3A	0	1	2	0	0	5	0	0	1
SNV:4G	0	1	3	0	0	3	1	1	0
SNV:1A,2T	0	0	0	0	0	0	0	9	0
SNV:-15T,2T,3A	0	0	1	0	1	5	0	1	0
SNV:-15T,-14T	1	0	2	0	0	1	2	0	1
SNV:3G	1	0	2	0	1	0	0	1	2
SNV:-8C	0	2	0	3	0	0	1	1	0
SNV:-4C,-2T,-1G	0	7	0	0	0	0	0	0	0
SNV:-15T,5T	0	0	2	2	1	0	2	0	0
SNV:-6G,-5A,-3G,-2T	0	6	0	0	0	0	0	0	0
SNV:1A,2T,3A	0	0	5	0	0	0	0	0	1
SNV:-5C,2T,3A	0	0	1	1	0	2	0	1	1
SNV:-14T,6T	0	0	0	1	0	1	1	3	0
SNV:-7T,6T	1	3	1	0	0	0	0	0	0
SNV:5T,6T	0	1	0	0	0	2	0	1	1
SNV:-4A,-2C,-1A,6T	0	5	0	0	0	0	0	0	0
SNV:2T,3A,5T	0	1	0	0	0	0	0	1	2
SNV:2A,5A	0	4	0	0	0	0	0	0	0
SNV:-16C,2T,3A	0	1	3	0	0	0	0	0	0
SNV:-13A,2T,3A	0	0	3	1	0	0	0	0	0
SNV:1A,2A,6C	0	0	4	0	0	0	0	0	0
SNV:2T,3A,4T	0	0	2	0	0	1	0	0	1
SNV:-11G,-7T	0	0	1	0	0	0	2	1	0
SNV:1T,6T	0	0	1	0	0	1	1	0	1
SNV:-3T,-2G,-1G	0	0	0	4	0	0	0	0	0
SNV:-13A,4A	1	1	0	0	0	0	1	0	0
SNV:-15T,-7T	1	1	0	1	0	0	0	0	0
SNV:1T,5T	0	1	0	0	0	2	0	0	0
SNV:-14T,2T,3A	0	1	0	0	0	0	0	0	2
SNV:2T,3A,5A	0	1	1	0	0	0	0	0	1
SNV:2T,3A,6T	0	1	0	0	0	2	0	0	0
SNV:-14A,2T,3A	0	0	3	0	0	0	0	0	0
SNV:-12G,2T,3A	0	0	2	0	0	1	0	0	0
SNV:-1C,2T,3A	0	0	1	0	0	0	0	0	2
SNV:-8G,2T,3A	0	0	1	0	0	1	0	0	1
SNV:-15T,-14A,6T	1	0	0	0	0	0	0	0	1
SNV:-15T,-14A	1	0	0	0	1	0	0	0	0
SNV:-14A,6T	1	0	0	1	0	0	0	0	0
SNV:-9A,-6A	1	0	0	0	0	0	0	0	1
SNV:1T,4T	1	0	0	0	0	0	0	0	1
SNV:-7T,2T,3A	0	1	0	0	0	1	0	0	0
SNV:1C,2A,3A,4A	0	2	0	0	0	0	0	0	0
SNV:-15T,1T,6T	0	1	0	0	0	1	0	0	0
SNV:-14A,-7T	0	1	0	0	0	0	0	0	1
SNV:-12C,2T,3A	0	2	0	0	0	0	0	0	0
SNV:-15T,-7T,1T,6T	0	0	1	0	0	1	0	0	0
SNV:-10A,2T,3A	0	0	2	0	0	0	0	0	0
SNV:2T,4A	0	0	1	0	0	0	0	0	1
SNV:-2G,2T,3A	0	0	1	0	0	0	0	0	1
SNV:2T,3A,4A	0	0	2	0	0	0	0	0	0
SNV:2T,3A,6A	0	0	1	0	0	0	0	1	0
SNV:-14C,-13T	0	0	1	0	0	0	0	0	1
SNV:-13T,2T,3A	0	0	1	0	0	0	0	0	1
SNV:4A,6T	0	0	1	0	0	0	0	1	0
SNV:-8C,6T	0	0	1	0	0	0	1	0	0
SNV:5C,6T	0	0	2	0	0	0	0	0	0
SNV:-15T,-12G	0	0	1	1	0	0	0	0	0
SNV:-15T,-7T,5T,6T	0	0	0	1	0	0	0	0	1
SNV:-15T,1T	0	0	0	0	1	0	0	1	0
SNV:-9T,5T	0	0	0	0	1	0	1	0	0
SNV:-12G,-4A	0	0	0	0	1	0	0	1	0
SNV:-3T,2T,3A	0	0	0	0	0	2	0	0	0
SNV:-10T,2T,3A	0	0	0	0	0	2	0	0	0
SNV:2T,3G	0	0	0	0	0	1	0	0	1
SNV:-14T,5T,6T	0	0	0	0	0	1	0	1	0
SNV:-12G,-5C	0	0	0	0	0	0	0	1	1
SNV:-3G,2T,3A	0	0	0	0	0	0	0	0	2
SNV:-15T,-11T,-9A,1T	1	0	0	0	0	0	0	0	0
SNV:-11G,5T	1	0	0	0	0	0	0	0	0
SNV:-13G,4A	1	0	0	0	0	0	0	0	0
SNV:-16G,-1G	1	0	0	0	0	0	0	0	0
SNV:-6T,6C	1	0	0	0	0	0	0	0	0
SNV:-8C,-6A,-2C	1	0	0	0	0	0	0	0	0
SNV:-3A,5T	1	0	0	0	0	0	0	0	0
SNV:-14T,-13A	1	0	0	0	0	0	0	0	0
SNV:-8G,1C	1	0	0	0	0	0	0	0	0
SNV:-5C,6C	1	0	0	0	0	0	0	0	0
SNV:-14C,-13A	1	0	0	0	0	0	0	0	0
SNV:-13A,1T,6T	1	0	0	0	0	0	0	0	0
SNV:-14T,-9A,1C,5A	1	0	0	0	0	0	0	0	0
SNV:-14A,-11G,-7T,4A	1	0	0	0	0	0	0	0	0
SNV:1T,2A,3A	1	0	0	0	0	0	0	0	0
SNV:-14A,-11G,-7T	1	0	0	0	0	0	0	0	0
SNV:-15T,-8T,4T,6T	1	0	0	0	0	0	0	0	0
SNV:-12G,5T	1	0	0	0	0	0	0	0	0
SNV:-14T,-11T,1T	1	0	0	0	0	0	0	0	0
SNV:-7T,-2G	1	0	0	0	0	0	0	0	0
SNV:-4C,5C	1	0	0	0	0	0	0	0	0
SNV:-14C,-11C,-2G	1	0	0	0	0	0	0	0	0
SNV:-16G,-11G,-9G,3A	0	1	0	0	0	0	0	0	0
SNV:-13A,-6A	0	1	0	0	0	0	0	0	0
SNV:-2T,6C	0	1	0	0	0	0	0	0	0
SNV:-15T,-13A	0	1	0	0	0	0	0	0	0
SNV:-15T,-14A,-8C,-4C,-2C	0	1	0	0	0	0	0	0	0
SNV:-12G,4T,6T	0	1	0	0	0	0	0	0	0
SNV:-6T,2T,3A,5T	0	1	0	0	0	0	0	0	0
SNV:-16G,-14C,-12A,-6G,-4C,-2T,-1G	0	1	0	0	0	0	0	0	0
SNV:-7T,2A	0	1	0	0	0	0	0	0	0
SNV:-7A,6C	0	1	0	0	0	0	0	0	0
SNV:-7T,5T	0	1	0	0	0	0	0	0	0
SNV:-13T,-12G,6T	0	1	0	0	0	0	0	0	0
SNV:-15T,-14T,-9T,1T,4T	0	1	0	0	0	0	0	0	0
SNV:-11T,-3A	0	1	0	0	0	0	0	0	0
SNV:-11T,2A,6T	0	1	0	0	0	0	0	0	0
SNV:-7T,-4A,-2C,-1A	0	1	0	0	0	0	0	0	0
SNV:-1G,6A	0	1	0	0	0	0	0	0	0
SNV:-12G,6C	0	1	0	0	0	0	0	0	0
SNV:-14C,-9T	0	1	0	0	0	0	0	0	0
SNV:-15T,3A,4T,5T	0	1	0	0	0	0	0	0	0
SNV:-3T,-2C	0	1	0	0	0	0	0	0	0
SNV:-15T,-3G,5C	0	0	1	0	0	0	0	0	0
SNV:-7T,5C,6T	0	0	1	0	0	0	0	0	0
SNV:-13T,-9A	0	0	1	0	0	0	0	0	0
SNV:-11C,6C	0	0	1	0	0	0	0	0	0
SNV:-10T,-8C,-7T	0	0	1	0	0	0	0	0	0
SNV:-15A,-12A,-8G,4G	0	0	1	0	0	0	0	0	0
SNV:-10G,2T,3A	0	0	1	0	0	0	0	0	0
SNV:-12A,-8G,2T,3A	0	0	1	0	0	0	0	0	0
SNV:-6T,-5C,-3G,-2C	0	0	1	0	0	0	0	0	0
SNV:-4A,1C	0	0	1	0	0	0	0	0	0
SNV:-15T,-7T,6T	0	0	1	0	0	0	0	0	0
SNV:-15T,-7T,1T,4T	0	0	1	0	0	0	0	0	0
SNV:2A,6T	0	0	1	0	0	0	0	0	0
SNV:-16G,-15T,-13T,3A	0	0	1	0	0	0	0	0	0
SNV:-15A,2T,3A	0	0	1	0	0	0	0	0	0
SNV:1T,2T,3A	0	0	1	0	0	0	0	0	0
SNV:-12A,3C	0	0	1	0	0	0	0	0	0
SNV:-16G,6T	0	0	1	0	0	0	0	0	0
SNV:-16G,2T,3A	0	0	1	0	0	0	0	0	0
SNV:-10T,3C	0	0	0	1	0	0	0	0	0
SNV:-14T,1T,6T	0	0	0	1	0	0	0	0	0
SNV:-1A,6T	0	0	0	1	0	0	0	0	0
SNV:-15T,-11T,5T,6T	0	0	0	1	0	0	0	0	0
SNV:-7T,4A	0	0	0	1	0	0	0	0	0
SNV:-13A,-6A,2A	0	0	0	1	0	0	0	0	0
SNV:-10G,1T,4T	0	0	0	1	0	0	0	0	0
SNV:-11T,5T	0	0	0	1	0	0	0	0	0
SNV:-15T,2A,5T,6T	0	0	0	1	0	0	0	0	0
SNV:-15T,1T,4A	0	0	0	1	0	0	0	0	0
SNV:-15T,-9A,5T	0	0	0	1	0	0	0	0	0
SNV:-4G,5T	0	0	0	1	0	0	0	0	0
SNV:-11G,3A	0	0	0	0	1	0	0	0	0
SNV:-11G,6T	0	0	0	0	1	0	0	0	0
SNV:-2C,3A	0	0	0	0	1	0	0	0	0
SNV:-16G,-2G	0	0	0	0	1	0	0	0	0
SNV:-8T,1T,6T	0	0	0	0	1	0	0	0	0
SNV:-11G,-8G	0	0	0	0	1	0	0	0	0
SNV:-7T,-5G,-4C	0	0	0	0	1	0	0	0	0
SNV:-8T,3A,5A	0	0	0	0	1	0	0	0	0
SNV:-15T,4T	0	0	0	0	1	0	0	0	0
SNV:-6G,2T,3A	0	0	0	0	1	0	0	0	0
SNV:-11T,-9T	0	0	0	0	1	0	0	0	0
SNV:3A,4T	0	0	0	0	1	0	0	0	0
SNV:-5A,-3A	0	0	0	0	1	0	0	0	0
SNV:-13T,6T	0	0	0	0	1	0	0	0	0
SNV:-14T,-13A,1T,4T	0	0	0	0	1	0	0	0	0
SNV:-12G,3G	0	0	0	0	1	0	0	0	0
SNV:-8T,-3T	0	0	0	0	1	0	0	0	0
SNV:-4G	0	0	0	0	1	0	0	0	0
SNV:-15T,-14T,-11T,5T,6T	0	0	0	0	1	0	0	0	0
SNV:-15T,-11T,6T	0	0	0	0	0	1	0	0	0
SNV:-16A,1A	0	0	0	0	0	1	0	0	0
SNV:-5C,2A	0	0	0	0	0	1	0	0	0
SNV:-2T,2T,3A	0	0	0	0	0	1	0	0	0
SNV:2T,3A,4A,6A	0	0	0	0	0	1	0	0	0
SNV:-15A,-14T,-6T	0	0	0	0	0	1	0	0	0
SNV:-4G,-2C,-1G,1A	0	0	0	0	0	1	0	0	0
SNV:-15A,-5A	0	0	0	0	0	1	0	0	0
SNV:-6A,2T,3A	0	0	0	0	0	1	0	0	0
SNV:-15T,-11T,1T	0	0	0	0	0	1	0	0	0
SNV:-14T,2T,3A,6T	0	0	0	0	0	1	0	0	0
SNV:-15T,3G,4T	0	0	0	0	0	1	0	0	0
SNV:-15T,-14T,-13T,-11T,-9A,1T	0	0	0	0	0	1	0	0	0
SNV:-14T,-7T	0	0	0	0	0	1	0	0	0
SNV:-11C,-9T	0	0	0	0	0	1	0	0	0
SNV:-15T,-14T,-9T,1T,4T,5T	0	0	0	0	0	1	0	0	0
SNV:-15T,4A,6T	0	0	0	0	0	1	0	0	0
SNV:-15T,-10A,-8T,1T,5T,6T	0	0	0	0	0	1	0	0	0
SNV:3A,6T	0	0	0	0	0	1	0	0	0
SNV:-16C,-13G,-12C	0	0	0	0	0	1	0	0	0
SNV:-15T,-14T,-8T,-7T,5T,6T	0	0	0	0	0	1	0	0	0
SNV:-15T,-8T	0	0	0	0	0	1	0	0	0
SNV:4T,6T	0	0	0	0	0	1	0	0	0
SNV:-16A,-7A,2T,3A	0	0	0	0	0	1	0	0	0
SNV:-5C,5T	0	0	0	0	0	1	0	0	0
SNV:-15T,-14T,1T	0	0	0	0	0	1	0	0	0
SNV:-13T,1T	0	0	0	0	0	1	0	0	0
SNV:-14A,-3G,-2C,2A,3A	0	0	0	0	0	1	0	0	0
SNV:5C,6A	0	0	0	0	0	1	0	0	0
SNV:-15T,-14T,-10A	0	0	0	0	0	1	0	0	0
SNV:-7T,4A,6T	0	0	0	0	0	0	1	0	0
SNV:-11T,-6A	0	0	0	0	0	0	1	0	0
SNV:-15C,-14A,-4A	0	0	0	0	0	0	1	0	0
SNV:-7A,-6G	0	0	0	0	0	0	1	0	0
SNV:-11T,6T	0	0	0	0	0	0	1	0	0
SNV:-16G,-15C,-8G,4T	0	0	0	0	0	0	1	0	0
SNV:-14T,5T	0	0	0	0	0	0	1	0	0
SNV:-12C,-9A	0	0	0	0	0	0	1	0	0
SNV:-12G,6T	0	0	0	0	0	0	1	0	0
SNV:-3T,-2G	0	0	0	0	0	0	1	0	0
SNV:-9G,1C	0	0	0	0	0	0	1	0	0
SNV:-15T,-11T	0	0	0	0	0	0	1	0	0
SNV:-15T,-14A,-10G,6T	0	0	0	0	0	0	1	0	0
SNV:-3A,-2T,1A	0	0	0	0	0	0	1	0	0
SNV:-8T,-7T,4T,6T	0	0	0	0	0	0	1	0	0
SNV:-5C,-3T	0	0	0	0	0	0	1	0	0
SNV:1T,4A,6C	0	0	0	0	0	0	1	0	0
SNV:-15T,-2C,3A	0	0	0	0	0	0	1	0	0
SNV:-15T,-11G,-7T	0	0	0	0	0	0	1	0	0
SNV:-7T,2T	0	0	0	0	0	0	1	0	0
SNV:-4G,1T,2T	0	0	0	0	0	0	1	0	0
SNV:-7A,-5G,-3A	0	0	0	0	0	0	1	0	0
SNV:-15T,-7T,3A,5T	0	0	0	0	0	0	0	1	0
SNV:-8T,-2C	0	0	0	0	0	0	0	1	0
SNV:-2C,4A	0	0	0	0	0	0	0	1	0
SNV:-15T,-9T,1T,5T,6T	0	0	0	0	0	0	0	1	0
SNV:-12C,-3A	0	0	0	0	0	0	0	1	0
SNV:-15T,-9A	0	0	0	0	0	0	0	1	0
SNV:-14T,-11G,-7C	0	0	0	0	0	0	0	1	0
SNV:-16G,-13G,-12G,6C	0	0	0	0	0	0	0	1	0
SNV:-9G,1A,5T,6T	0	0	0	0	0	0	0	1	0
SNV:-7T,4T	0	0	0	0	0	0	0	1	0
SNV:-15T,2G	0	0	0	0	0	0	0	1	0
SNV:-7C,1T,5T	0	0	0	0	0	0	0	1	0
SNV:1A,5T	0	0	0	0	0	0	0	1	0
SNV:-14T,6A	0	0	0	0	0	0	0	1	0
SNV:-15T,-13A,6T	0	0	0	0	0	0	0	1	0
SNV:-1G,1C	0	0	0	0	0	0	0	1	0
SNV:-5C,4T	0	0	0	0	0	0	0	1	0
SNV:-14T,-11T,-2T	0	0	0	0	0	0	0	1	0
SNV:-11G,-10A,-1A,3C	0	0	0	0	0	0	0	0	1
SNV:-16A,2T,3A	0	0	0	0	0	0	0	0	1
SNV:-7T,-6T	0	0	0	0	0	0	0	0	1
SNV:-15C,-12G,-8C,-4A,1T,2A	0	0	0	0	0	0	0	0	1
SNV:-2C,5C	0	0	0	0	0	0	0	0	1
SNV:-6A,2T	0	0	0	0	0	0	0	0	1
SNV:-13A,-2C	0	0	0	0	0	0	0	0	1
SNV:-12G,-4A,4T	0	0	0	0	0	0	0	0	1
SNV:-3G,3A	0	0	0	0	0	0	0	0	1
SNV:-8T,3A,6T	0	0	0	0	0	0	0	0	1
SNV:-15T,-8T,-7A,6C	0	0	0	0	0	0	0	0	1
SNV:-16C,-8C,1C	0	0	0	0	0	0	0	0	1
SNV:-14T,4T	0	0	0	0	0	0	0	0	1
SNV:-12A,2T,3A	0	0	0	0	0	0	0	0	1
SNV:-14A,-11G	0	0	0	0	0	0	0	0	1
SNV:-14T,1T	0	0	0	0	0	0	0	0	1
SNV:-13T,-5A	0	0	0	0	0	0	0	0	1
SNV:-15T,-5C	0	0	0	0	0	0	0	0	1
-1:1I	254	3576	2767	228	1617	2071	81	2558	1493
-7:7D	22	1985	678	44	639	229	16	900	194
-2:2I	1	432	192	42	146	301	6	193	126
-14:14D	49	495	247	19	188	117	4	216	82
-3:2D	0	635	163	9	104	81	0	191	52
-2:1I	26	216	237	0	137	110	0	115	102
-9:15D	15	283	105	5	141	71	3	155	56
-15:19D	3	220	133	12	127	51	0	115	29
-6:21D	22	193	119	2	121	32	4	137	22
1:4D	9	129	136	1	76	69	0	115	80
-3:9D	8	217	68	0	59	32	0	125	13
2:1I	16	64	46	38	30	49	27	190	8
-4:6D	0	128	73	0	34	57	0	120	14
-11:9D	8	160	88	0	40	57	0	35	28
-1:2I	0	109	36	14	65	23	0	97	59
1:6D	0	107	66	8	64	24	0	67	40
-2:1D	5	49	101	0	58	47	0	68	22
-3:12D	8	129	59	3	56	7	0	62	19
-9:8D	1	84	39	0	30	42	0	66	22
1:9D	27	88	36	1	33	34	0	46	10
-8:7D	0	47	52	9	41	35	0	36	36
-1:1D	0	97	78	0	10	15	0	31	14
-7:12D	0	68	25	0	37	23	0	60	16
-14:22D	6	52	52	0	30	16	0	39	29
1:5D	0	45	42	0	25	38	0	38	34
-9:6D	0	64	56	4	10	18	0	13	13
-1:3D	0	76	28	3	31	17	0	9	4
-1:40I	19	17	42	0	15	14	0	60	0
1:8D	0	27	49	0	12	1	0	47	30
-1:41I	19	40	13	0	6	10	0	63	12
1:7D	0	63	35	0	23	6	0	28	3
1:1D	0	42	33	7	18	10	1	34	0
1:10D	0	72	24	4	16	18	0	0	8
-10:16D	6	53	29	0	28	0	0	7	13
-10:19D	0	49	25	9	13	7	0	30	0
-2:3I	9	11	31	0	20	11	0	38	9
-12:11D	0	59	17	0	9	22	0	18	3
-10:7D	0	35	37	0	13	14	0	25	0
2:1D	0	58	31	0	0	8	0	0	23
-14:18D	0	26	47	0	6	3	0	31	4
-13:28D	0	34	18	16	30	5	0	9	3
-1:42I	0	18	26	0	27	4	0	40	0
1:1I	0	44	23	0	8	0	0	4	25
-1:17D	0	7	52	6	9	0	0	22	5
-1:38I	0	22	21	0	10	0	11	36	1
-16:15D	19	28	15	0	7	6	0	5	19
-8:20D	0	36	12	0	26	0	0	1	21
-1:39I	0	1	0	0	0	27	0	37	30
-4:3D	0	33	18	0	11	16	0	4	12
-1:18D	0	51	13	0	12	0	0	15	2
1:15D	0	41	23	0	8	0	0	6	13
-13:16D	0	20	24	9	7	12	0	0	17
-2:14D	0	27	0	0	22	7	0	21	8
-11:10D	0	32	16	12	16	0	0	4	3
-9:18D	0	31	3	1	18	13	0	12	1
-1:44I	11	10	8	0	22	7	0	17	3
-2:13D	0	21	31	0	0	7	0	18	1
-15:14D	9	27	20	9	6	0	0	4	1
-11:21D	0	27	15	0	16	7	0	7	4
-1:82I	0	0	0	0	11	13	0	15	37
-6:6D	22	11	22	0	1	0	0	1	17
-1:80I	0	18	29	0	18	0	0	9	0
-1:43I	0	8	5	0	14	16	0	30	0
1:11D	0	9	40	5	6	7	0	6	0
-10:8D	0	5	13	10	22	4	0	19	0
-3:1I	15	48	0	0	4	0	0	0	5
-1:5D	0	32	13	0	11	6	0	10	0
-17:18D	0	12	6	0	6	28	0	14	6
-2:2D	5	31	15	0	0	4	0	13	0
-5:4D	0	35	27	0	6	0	0	0	0
-1:69I	0	4	0	0	0	0	0	53	11
-8:8D	0	12	5	0	15	16	0	16	4
-1:6D	0	21	13	0	0	0	0	33	0
-1:30I	0	15	7	0	4	6	0	21	14
-1:70I	0	16	10	0	6	10	0	16	9
-3:4D	10	15	0	0	4	5	0	18	14
-3:17D	0	17	4	0	22	0	0	18	4
-2:41I	0	4	0	0	19	41	0	0	0
-1:7D	0	28	6	0	12	6	0	10	0
1:8I	0	22	16	0	13	0	0	0	10
-4:24D	15	26	0	0	5	0	0	14	0
-13:10D	0	23	22	0	4	2	0	6	3
-11:18D	0	15	8	0	1	3	0	20	13
-10:24D	0	28	6	0	11	0	0	12	2
-3:15D	0	10	20	0	12	0	0	16	1
-1:5I	0	9	33	0	4	7	0	6	0
-11:22D	0	28	0	0	0	16	0	12	0
1:16D	0	31	4	0	8	3	1	3	6
-2:15D	0	33	17	0	0	0	0	5	0
-1:35I	0	9	2	0	16	0	0	11	16
-17:23D	0	0	21	0	5	0	0	27	0
-7:11D	5	23	8	3	5	0	0	8	0
-10:10D	2	25	0	0	16	0	0	9	0
-1:29I	0	3	6	0	10	32	0	0	0
-9:9D	0	13	0	0	7	3	0	15	12
-2:43I	0	0	9	0	16	0	0	21	4
1:3I	11	20	11	0	0	0	0	7	0
-14:27D	0	28	0	0	9	0	0	2	9
-1:33I	0	10	8	0	0	11	0	19	0
1:41I	0	13	27	2	6	0	0	0	0
6:8I	0	0	33	0	0	0	0	0	15
1:34I	0	11	0	0	3	12	0	9	12
-1:3I	0	14	15	0	9	0	0	4	5
1:2D	0	10	8	0	3	6	0	20	0
-12:29D	0	40	3	0	3	0	0	0	0
-1:66I	0	12	12	0	11	6	0	0	5
-1:75I	0	4	27	0	3	0	0	11	0
1:13I	0	0	16	0	3	13	0	0	13
-3:30I	0	13	15	0	0	16	0	0	0
-3:10D	20	6	6	0	5	6	0	0	0
-9:14D	0	37	0	0	1	0	0	0	5
-1:10I	0	19	13	0	0	4	0	7	0
-1:37I	0	0	11	0	0	4	0	15	13
-3:7D	0	11	0	0	3	0	0	28	0
-1:62I	0	6	0	0	10	0	0	26	0
-1:84I	0	9	0	0	12	8	0	0	12
-11:15D	0	19	0	0	7	6	0	9	0
-2:7D	0	28	0	0	12	0	0	1	0
-13:11D	0	13	0	0	8	0	0	14	6
-1:76I	0	20	11	0	0	0	0	0	10
-1:74I	0	7	8	0	5	0	0	21	0
2:24I	0	0	31	0	0	10	0	0	0
1:4I	0	11	3	0	10	0	0	16	0
-4:3I	0	21	11	0	0	2	0	6	0
2:30I	0	9	13	0	15	0	0	0	3
2:18I	0	0	28	0	0	10	0	2	0
-2:76I	0	15	0	0	10	14	0	0	0
-10:13D	0	5	13	0	3	10	0	8	0
-1:67I	0	0	0	0	0	1	0	11	27
-21:27D	0	19	18	0	1	0	0	0	0
-1:83I	0	6	0	0	2	0	0	30	0
-17:26D	0	8	11	0	8	1	0	10	0
-1:8I	0	19	16	0	0	3	0	0	0
-1:72I	0	9	0	0	0	0	0	14	15
-14:13D	0	12	7	0	9	5	0	4	1
-3:18D	0	1	7	0	8	0	0	15	7
-15:23D	0	6	11	0	3	10	0	8	0
-3:28I	0	0	0	0	0	33	0	0	5
-1:9I	7	14	0	0	3	6	0	7	0
-1:6I	0	14	0	0	3	2	0	18	0
-13:12D	0	13	5	0	1	8	0	0	10
1:21I	0	25	0	0	0	0	0	0	12
6:3I	0	0	16	0	0	9	0	0	12
-1:78I	0	0	2	0	5	0	0	7	23
1:13D	0	18	1	0	8	4	0	0	5
-1:77I	0	18	0	0	2	5	0	0	11
1:40I	0	4	0	0	10	9	0	13	0
-3:1D	0	11	9	0	9	0	0	0	6
-2:45I	0	12	0	0	0	0	0	0	22
-1:71I	0	6	0	0	0	15	0	13	0
-10:31I,-6:1D,-1:25I	0	0	0	0	0	34	0	0	0
-2:4I	0	5	0	0	2	7	0	15	4
-6:5D	0	12	8	0	3	0	0	8	2
1:14D	0	7	12	0	1	2	0	9	2
-1:89I	0	0	16	0	0	3	0	1	13
-1:65I	0	0	0	0	12	0	0	18	3
1:44I	0	0	0	0	3	0	0	24	6
-1:4I	0	9	15	0	0	0	0	8	0
-1:73I	0	7	0	0	17	0	0	8	0
-1:86I	0	13	0	0	9	10	0	0	0
-5:1I	0	10	0	0	3	0	0	19	0
-11:19D	0	15	0	5	8	0	0	4	0
-1:50I	0	4	0	0	12	0	0	16	0
-2:82I	0	0	8	0	5	0	0	16	3
-4:46I	0	0	0	0	0	0	0	32	0
-1:4D	17	5	0	0	0	1	0	0	8
1:43I	0	12	0	0	0	0	0	19	0
-3:12I	0	17	11	0	2	0	0	0	0
-1:52I	0	24	6	0	0	0	0	0	0
-4:20D	1	2	9	0	10	0	0	4	3
-2:5I	0	15	0	0	9	0	0	5	0
-3:14D	0	14	0	7	8	0	0	0	0
-3:39I	0	16	7	0	6	0	0	0	0
-1:11D	0	3	0	0	3	7	0	16	0
2:15I	0	0	13	0	0	2	0	0	14
-4:12D	0	0	24	0	0	0	0	5	0
-2:88I	0	0	5	0	8	0	0	0	16
-13:31D	2	8	0	9	8	1	0	0	0
-5:22D	0	15	0	0	5	5	0	3	0
-1:45I	0	7	0	0	0	1	0	20	0
-1:15I	0	0	28	0	0	0	0	0	0
-2:49I	0	0	0	0	0	0	0	0	28
-2:10D	0	16	0	0	0	11	0	0	0
1:19I	0	14	9	0	0	4	0	0	0
1:78I	0	9	0	0	14	0	0	4	0
-5:11D	0	4	18	0	5	0	0	0	0
-17:14D	0	8	19	0	0	0	0	0	0
1:12D	0	10	0	0	10	1	0	0	6
5:10I	0	1	6	0	0	0	0	0	20
1:82I	0	0	0	0	0	0	0	27	0
1:14I	0	7	0	0	5	0	0	0	14
-2:19I	0	5	0	0	5	8	0	1	7
-19:35D	0	11	0	0	7	0	0	8	0
-9:12D	0	13	0	0	0	0	0	13	0
-2:84I	0	4	0	0	0	10	0	0	12
-9:23D	0	1	0	5	9	0	0	11	0
-3:40I	0	0	16	0	0	10	0	0	0
1:52I	0	0	26	0	0	0	0	0	0
1:67I	0	0	0	0	1	0	0	25	0
-1:17I	0	0	0	0	0	11	0	15	0
-1:11I	0	12	7	0	6	0	0	0	0
1:18I	0	5	0	0	0	0	20	0	0
-15:28D	0	7	0	0	13	0	0	5	0
1:83I	0	1	0	0	6	7	0	11	0
1:17I	0	11	0	0	0	12	0	0	2
-11:23D	0	10	3	0	3	3	0	6	0
-18:24D	0	5	5	0	4	9	0	0	2
-15:20D	0	0	8	0	0	6	0	3	8
-11:1I,-6:54I,1:3I	0	0	0	0	0	0	0	25	0
-18:32D	0	6	7	0	0	9	0	2	0
2:39I	0	4	18	0	0	1	0	0	1
-10:11D	0	2	0	0	8	6	0	8	0
-1:34I	0	0	14	0	0	0	0	10	0
-3:42I	0	0	8	0	3	6	0	7	0
-19:21D	0	13	0	0	4	2	0	4	0
-4:70I	0	23	0	0	0	0	0	0	0
-15:13D	0	11	0	0	1	11	0	0	0
-4:15D	0	16	2	0	0	0	0	5	0
-31:33D	0	18	4	0	0	0	0	1	0
-11:16D	0	0	10	0	7	1	5	0	0
1:11I	0	0	4	0	0	0	0	19	0
-1:21I	0	0	0	0	0	0	0	0	23
-3:77I	0	21	0	0	0	0	0	1	0
5:9I	0	8	5	5	0	0	0	0	4
-5:3I	0	18	4	0	0	0	0	0	0
-3:46I	0	6	0	0	16	0	0	0	0
-47:51D	0	12	10	0	0	0	0	0	0
-21:30D	0	3	12	0	1	6	0	0	0
-5:6D	0	6	8	0	0	6	0	2	0
-3:25I	0	0	0	0	0	16	0	6	0
-2:77I	0	0	0	0	0	22	0	0	0
-1:56I	0	0	0	0	0	0	0	22	0
-1:12I	0	17	2	0	0	2	0	0	0
-5:11I	0	4	11	0	0	0	0	6	0
-18:27D	0	1	20	0	0	0	0	0	0
-1:2D	0	0	7	0	5	0	0	5	4
2:25I	0	0	0	6	0	15	0	0	0
-2:39I	0	0	0	0	5	0	0	16	0
-3:43I	0	0	0	0	0	11	0	0	10
2:46I	20	0	0	0	0	0	0	0	0
1:88I	0	14	0	0	6	0	0	0	0
1:62I	0	5	0	0	0	15	0	0	0
-3:62I	0	20	0	0	0	0	0	0	0
-10:1D,-3:2D	0	14	0	0	6	0	0	0	0
1:2I	0	8	0	0	1	5	0	6	0
-1:31I	0	9	0	0	0	11	0	0	0
-2:40I	0	9	0	0	11	0	0	0	0
1:36I	0	5	0	0	0	15	0	0	0
-2:11D	0	1	16	0	3	0	0	0	0
-25:27D	0	0	5	0	5	2	0	8	0
-29:42D	0	0	20	0	0	0	0	0	0
-1:54I	0	0	0	0	20	0	0	0	0
-2:87I	0	0	0	0	7	0	0	13	0
-4:15I,-1:46I	0	0	0	0	0	0	0	20	0
-9:10D	10	2	0	0	0	7	0	0	0
-15:1D	2	1	4	1	2	1	5	3	0
-1:53I	0	10	0	0	0	0	0	0	9
-1:58I	0	2	1	0	9	0	0	0	7
-2:42I	0	11	0	0	0	0	0	8	0
-1:8D	0	4	0	0	5	0	0	0	10
1:29I	0	5	0	0	0	10	0	0	4
-6:3D	0	15	0	0	0	4	0	0	0
-2:24I	0	8	0	0	0	0	0	11	0
1:10I	0	5	0	0	0	0	0	0	14
6:25I	0	0	15	0	0	4	0	0	0
-3:2I	0	0	1	0	0	0	0	3	15
-3:83I	0	0	3	16	0	0	0	0	0
-2:36I,3:42I	0	0	0	0	0	0	0	19	0
-10:61I,-8:5D	0	0	0	0	0	0	0	0	19
-19:8D,-7:7D	0	18	0	0	0	0	0	0	0
-2:73I	0	9	0	0	7	0	0	0	2
-14:12D	0	4	0	0	0	8	0	0	6
-1:10D	0	2	0	0	4	11	0	0	1
-15:25D	0	8	10	0	0	0	0	0	0
-8:13D	0	18	0	0	0	0	0	0	0
-1:25I	0	11	7	0	0	0	0	0	0
-19:5D,-10:17D	0	0	18	0	0	0	0	0	0
4:4I,5:8D	0	0	18	0	0	0	0	0	0
-7:2D	0	0	18	0	0	0	0	0	0
1:23I	0	0	0	18	0	0	0	0	0
2:6D	0	0	0	0	0	10	0	8	0
-2:74I	0	0	0	0	0	0	0	18	0
-4:17I,-1:13I	0	0	0	0	0	0	0	18	0
-38:39D	6	3	0	0	0	8	0	0	0
-5:1D	1	0	6	0	2	0	0	2	6
1:7I	0	9	8	0	0	0	0	0	0
-3:70I	0	4	0	0	8	0	0	5	0
-13:24D	0	9	0	0	0	5	0	3	0
-1:90I	0	0	4	0	0	0	0	13	0
-11:30D	0	0	2	0	0	9	0	2	4
-1:18I	0	0	0	0	4	5	0	0	8
-7:35I,-2:24I	0	0	0	0	0	0	0	17	0
2:4I	0	0	0	0	0	0	0	0	17
-10:1D	2	2	7	1	1	1	1	0	1
-12:5D,5:8I	16	0	0	0	0	0	0	0	0
-3:4I,-1:1D	0	5	4	0	7	0	0	0	0
2:3D	0	8	0	0	0	1	0	0	7
-9:21D	0	12	0	0	0	0	0	4	0
-1:64I	0	12	0	0	4	0	0	0	0
-1:7I	0	9	0	0	1	0	0	6	0
-4:17D	0	7	0	0	0	7	0	2	0
2:2D	0	10	6	0	0	0	0	0	0
-8:1I	0	6	0	0	0	0	0	10	0
-1:16I	0	4	12	0	0	0	0	0	0
-1:81I	0	3	0	0	3	0	0	2	8
-9:30D	0	0	2	0	14	0	0	0	0
-2:37I	0	0	16	0	0	0	0	0	0
2:14I,4:1D	0	0	9	0	0	7	0	0	0
-12:18D	0	0	13	0	0	0	0	0	3
-2:44I	0	0	8	0	8	0	0	0	0
-2:8D	0	0	0	0	2	3	0	11	0
1:27I,4:7I	0	0	0	0	0	0	0	0	16
1:59I,4:4I	0	15	0	0	0	0	0	0	0
-19:19D	0	7	0	0	0	3	0	5	0
-4:8D	0	11	0	0	0	0	0	4	0
-2:36I	0	11	0	0	4	0	0	0	0
-7:42D	0	15	0	0	0	0	0	0	0
-2:16D	0	6	2	0	0	0	0	7	0
-3:3I,1:11I	0	15	0	0	0	0	0	0	0
1:68I	0	12	0	0	3	0	0	0	0
-27:21D	0	0	15	0	0	0	0	0	0
-3:13I,-1:1D	0	0	15	0	0	0	0	0	0
1:30I	0	0	9	0	0	6	0	0	0
1:70I	0	0	0	0	6	9	0	0	0
-2:66I	0	0	0	0	15	0	0	0	0
1:72I	0	0	0	0	7	0	0	0	8
1:42I	0	0	0	0	3	10	0	0	2
-1:88I	0	0	0	0	15	0	0	0	0
-10:25D	0	0	0	0	6	7	0	2	0
2:1D,4:7I	0	0	0	0	2	0	0	0	13
-1:79I	0	0	0	0	1	8	0	0	6
-1:19I,3:25I	0	0	0	0	0	0	0	15	0
-1:26I	0	0	0	0	0	0	0	0	15
-12:8I,-6:65I,-1:3I	0	0	0	0	0	0	0	0	15
-9:1I,-6:53I,-3:2D	0	0	0	0	0	0	0	0	15
-16:1D	1	1	2	0	0	6	1	2	1
-13:20D	0	10	0	0	0	0	0	4	0
-9:27D	0	10	0	0	1	0	0	2	1
-1:27I	0	9	0	0	5	0	0	0	0
-3:6I,-1:1D	0	14	0	0	0	0	0	0	0
1:3I,5:1D	0	14	0	0	0	0	0	0	0
-9:20D	0	3	0	0	2	0	0	3	6
-18:19D	0	1	3	0	2	0	0	8	0
-2:65I	0	0	9	0	0	5	0	0	0
-3:10I,1:3I,4:24I	0	0	14	0	0	0	0	0	0
-1:32I	0	0	4	0	0	2	0	8	0
-5:5D	0	0	3	0	0	11	0	0	0
-2:69I	0	0	0	0	2	0	0	0	12
-2:13I	0	0	0	0	14	0	0	0	0
-2:6I	0	0	0	0	0	13	0	1	0
2:10I,4:4D	0	0	0	0	0	14	0	0	0
-9:17I	0	0	0	0	0	0	0	14	0
-4:45I	0	0	0	0	0	0	0	14	0
-10:42I,-7:14I,-2:10I	0	0	0	0	0	0	0	14	0
-1:26I,3:9I	0	0	0	0	0	0	0	14	0
1:22I	0	0	0	0	0	0	0	0	14
2:6I	0	0	0	0	0	0	0	0	14
-9:26D	13	0	0	0	0	0	0	0	0
-27:28D	0	13	0	0	0	0	0	0	0
-12:7I,-1:30I	0	13	0	0	0	0	0	0	0
-23:22D	0	13	0	0	0	0	0	0	0
-13:18I,-11:3I,-4:25I,-1:14I	0	12	0	0	0	0	0	1	0
-12:5I,-7:7D	0	13	0	0	0	0	0	0	0
-1:63I	0	5	0	0	0	7	0	1	0
-5:1D,-2:8I	0	13	0	0	0	0	0	0	0
2:19I,6:4I	0	13	0	0	0	0	0	0	0
-10:15D	0	5	0	0	8	0	0	0	0
-12:17D	0	13	0	0	0	0	0	0	0
2:11I	0	9	4	0	0	0	0	0	0
-2:25I	0	0	13	0	0	0	0	0	0
1:15I,4:17I	0	0	13	0	0	0	0	0	0
1:38I	0	0	13	0	0	0	0	0	0
-2:71I	0	0	9	0	4	0	0	0	0
-8:1I,-3:2D	0	0	13	0	0	0	0	0	0
1:2D,4:1I	0	0	0	0	0	13	0	0	0
-12:16I,-6:8I	0	0	0	0	0	13	0	0	0
-12:2D,-3:2D	0	0	0	0	0	0	0	13	0
-4:42I	0	0	0	0	0	0	0	13	0
-6:30I,-1:25I	0	0	0	0	0	0	0	13	0
1:53I	0	0	0	0	0	0	0	13	0
-14:2D,-6:9I,-4:4I,-2:8I	0	0	0	0	0	0	0	13	0
-10:40D	0	0	0	0	0	0	0	13	0
-8:37I,-5:1I,-2:21I	0	0	0	0	0	0	0	0	13
1:32I	1	0	11	0	0	0	0	0	0
1:28I	0	6	6	0	0	0	0	0	0
-26:34D	0	12	0	0	0	0	0	0	0
-11:20D	0	8	0	0	3	0	0	1	0
-2:48I	0	10	0	0	0	0	0	2	0
1:9I	0	12	0	0	0	0	0	0	0
2:58I	0	12	0	0	0	0	0	0	0
-15:17D	0	12	0	0	0	0	0	0	0
-1:24I	0	12	0	0	0	0	0	0	0
3:13I,5:1D	0	5	7	0	0	0	0	0	0
-2:61I	0	12	0	0	0	0	0	0	0
-14:25D	0	11	0	0	0	0	0	0	1
-1:1I,4:6I	0	12	0	0	0	0	0	0	0
1:12I	0	6	0	0	0	3	0	0	3
-12:9D	0	7	3	0	0	0	0	2	0
-1:13I	0	4	0	0	0	0	0	8	0
-4:8I,-1:1D	0	0	7	0	5	0	0	0	0
-2:20D	0	0	5	0	1	0	0	3	3
-4:24I	0	0	12	0	0	0	0	0	0
-7:1I,-3:2D	0	0	12	0	0	0	0	0	0
-24:22D	0	0	12	0	0	0	0	0	0
-19:15D	0	0	9	0	1	0	0	2	0
-8:1I,-6:23I	0	0	12	0	0	0	0	0	0
-13:29D	0	0	4	0	0	0	0	8	0
-2:8I	0	0	10	0	2	0	0	0	0
-7:3D,-1:2I	0	0	12	0	0	0	0	0	0
-1:19I	0	0	5	0	0	7	0	0	0
1:13I,3:1D	0	0	5	0	0	0	0	0	7
-1:36I	0	0	2	0	0	0	0	0	10
-1:20I	0	0	0	0	0	12	0	0	0
-1:20D	0	0	0	0	0	9	0	3	0
-2:90I	0	0	0	0	0	0	0	12	0
-11:19I,-4:22I,-1:7I	0	0	0	0	0	0	0	12	0
-10:1I,-7:31I,-3:25I	0	0	0	0	0	0	0	12	0
3:71I	0	0	0	0	0	0	0	12	0
1:46I	0	0	0	0	0	0	0	0	12
-3:17I	0	0	0	0	0	0	0	0	12
1:9I,3:2I,5:13I	0	0	0	0	0	0	0	0	12
-2:9I	0	3	0	0	3	0	0	0	5
-1:61I	0	11	0	0	0	0	0	0	0
-7:20I	0	11	0	0	0	0	0	0	0
-1:14I	0	5	0	0	6	0	0	0	0
-12:12D	0	6	0	0	0	0	0	1	4
-3:2I,-2:1D	0	11	0	0	0	0	0	0	0
2:11D	0	6	5	0	0	0	0	0	0
-13:5I,-11:16I,-8:2D,-4:8I,-2:1D	0	11	0	0	0	0	0	0	0
1:75I	0	5	0	0	0	0	0	0	6
1:86I	0	11	0	0	0	0	0	0	0
-1:49I	0	10	0	0	1	0	0	0	0
-2:12I	0	1	0	0	0	0	0	10	0
1:5I	0	2	0	0	6	0	0	0	3
-5:2D,-2:1I	0	0	11	0	0	0	0	0	0
1:87I	0	0	8	0	3	0	0	0	0
-1:59I	0	0	11	0	0	0	0	0	0
5:1I	0	0	11	0	0	0	0	0	0
-10:28D	0	0	0	0	7	3	0	0	1
-8:19D	0	0	0	0	11	0	0	0	0
1:77I	0	0	0	0	11	0	0	0	0
-1:3D,5:1I	0	0	0	0	11	0	0	0	0
-12:24D	0	0	0	0	3	0	0	8	0
1:63I	0	0	0	0	6	5	0	0	0
-3:3I	0	0	0	0	11	0	0	0	0
-3:45I	0	0	0	0	6	0	0	5	0
-10:17D	0	0	0	0	3	5	0	3	0
-16:33D	0	0	0	0	2	0	0	9	0
-2:54I	0	0	0	0	0	7	0	0	4
2:26I	0	0	0	0	0	11	0	0	0
-6:1D,-4:13I,-1:8D	0	0	0	0	0	0	11	0	0
-4:16D	0	0	0	0	0	0	0	11	0
-8:20I,1:9I	0	0	0	0	0	0	0	11	0
-6:1I,-2:34I	0	0	0	0	0	0	0	11	0
2:3D,6:25I	0	0	0	0	0	0	0	11	0
-6:21I	0	0	0	0	0	0	0	0	11
3:27I	0	0	0	0	0	0	0	0	11
-15:22I,-6:7I,-2:35I	0	0	0	0	0	0	0	0	11
-5:1D,-2:7I	0	10	0	0	0	0	0	0	0
-5:12I	0	6	0	0	0	0	0	4	0
-19:14D,2:1D	0	10	0	0	0	0	0	0	0
1:45I	0	10	0	0	0	0	0	0	0
-3:73I	0	10	0	0	0	0	0	0	0
-15:22D	0	7	0	0	0	0	0	3	0
-7:72I	0	10	0	0	0	0	0	0	0
-6:15I	0	10	0	0	0	0	0	0	0
-1:10I,2:1D,5:6I	0	10	0	0	0	0	0	0	0
-7:9I	0	10	0	0	0	0	0	0	0
-2:60I	0	10	0	0	0	0	0	0	0
-7:1I	0	10	0	0	0	0	0	0	0
-19:36D	0	5	0	0	0	0	0	5	0
-3:39D	0	0	10	0	0	0	0	0	0
1:27D	0	0	10	0	0	0	0	0	0
1:10I,3:4I	0	0	10	0	0	0	0	0	0
2:9D	0	0	10	0	0	0	0	0	0
-14:7I,-1:4I	0	0	10	0	0	0	0	0	0
-6:6I,1:9D	0	0	10	0	0	0	0	0	0
-9:33I,-4:40I,-2:10I	0	0	0	0	10	0	0	0	0
-3:67I	0	0	0	0	10	0	0	0	0
-4:42D	0	0	0	0	10	0	0	0	0
-12:6D,-1:26I	0	0	0	0	10	0	0	0	0
3:28I	0	0	0	0	1	8	0	0	1
-11:34D	0	0	0	0	3	2	0	5	0
1:51I	0	0	0	0	3	6	0	0	1
2:23I	0	0	0	0	0	10	0	0	0
-3:29I	0	0	0	0	0	10	0	0	0
-24:11D,-7:7D	0	0	0	0	0	10	0	0	0
2:14I,4:8I	0	0	0	0	0	10	0	0	0
3:9D	0	0	0	0	0	10	0	0	0
2:24D	0	0	0	0	0	0	0	10	0
-14:2D,-10:5D,-1:2I	0	0	0	0	0	0	0	10	0
1:33I	0	0	0	0	0	0	0	10	0
2:1D,4:12I	0	0	0	0	0	0	0	0	10
-6:1D	0	0	0	0	0	0	0	0	10
1:71I	5	0	0	0	3	1	0	0	0
-46:46D	0	4	0	0	0	5	0	0	0
-38:47D	0	6	0	0	0	3	0	0	0
-1:1D,3:4I	0	9	0	0	0	0	0	0	0
-2:18I	0	9	0	0	0	0	0	0	0
-13:2D,-7:5D	0	9	0	0	0	0	0	0	0
-10:6D	0	9	0	0	0	0	0	0	0
-5:2D,4:1D	0	9	0	0	0	0	0	0	0
5:2D	0	6	0	0	0	3	0	0	0
1:65I	0	9	0	0	0	0	0	0	0
4:39I	0	9	0	0	0	0	0	0	0
-3:9I	0	3	0	0	0	6	0	0	0
-16:19D	0	5	0	0	4	0	0	0	0
-9:22D	0	3	6	0	0	0	0	0	0
-2:33I	0	9	0	0	0	0	0	0	0
-1:4I,2:8I	0	9	0	0	0	0	0	0	0
-3:4D,5:1D	0	9	0	0	0	0	0	0	0
-9:44I,-1:20I	0	9	0	0	0	0	0	0	0
-2:35I,1:28I	0	9	0	0	0	0	0	0	0
1:1D,6:69I	0	9	0	0	0	0	0	0	0
-2:38I	0	4	0	0	3	0	0	2	0
1:5I,3:4I	0	9	0	0	0	0	0	0	0
2:17I	0	0	9	0	0	0	0	0	0
-3:2D,4:1D	0	0	9	0	0	0	0	0	0
-2:10I,1:1D	0	0	0	0	9	0	0	0	0
-12:52I,-6:16I,-2:1I	0	0	0	0	9	0	0	0	0
-6:40I,-2:19I	0	0	0	0	9	0	0	0	0
-11:3I,-3:62I	0	0	0	0	9	0	0	0	0
-3:80I	0	0	0	0	9	0	0	0	0
-13:2D,-9:13I,-6:18I	0	0	0	0	9	0	0	0	0
1:15I,5:14I	0	0	0	0	9	0	0	0	0
1:6I	0	0	0	0	3	6	0	0	0
-10:14D	0	0	0	0	3	0	0	6	0
-17:16D	0	0	0	0	2	0	0	0	7
5:25I	0	0	0	0	1	8	0	0	0
-13:9D,1:4I	0	0	0	0	1	8	0	0	0
-7:47I	0	0	0	0	0	9	0	0	0
1:9I,4:3I	0	0	0	0	0	9	0	0	0
-3:37I	0	0	0	0	0	5	0	4	0
-3:18I	0	0	0	0	0	0	0	9	0
-12:13I,-7:49I,-4:13I,-2:1D	0	0	0	0	0	0	0	9	0
-9:23I,-4:5I	0	0	0	0	0	0	0	9	0
-2:41I,2:1D	0	0	0	0	0	0	0	9	0
5:5I	0	0	0	0	0	0	0	9	0
-4:23I,1:1I	0	0	0	0	0	0	0	9	0
-3:10I,-1:4I	0	0	0	0	0	0	0	9	0
5:29I	0	0	0	0	0	0	0	0	9
-2:64I	0	0	0	0	0	0	0	0	9
-13:25D	0	7	0	0	0	1	0	0	0
-3:2I,-1:1D	0	8	0	0	0	0	0	0	0
-19:8D,-6:10I,-3:2D	0	8	0	0	0	0	0	0	0
-3:3I,-1:19I	0	8	0	0	0	0	0	0	0
-6:36D	0	8	0	0	0	0	0	0	0
3:61I	0	6	0	0	2	0	0	0	0
-6:5I,-4:16I,-1:12I	0	8	0	0	0	0	0	0	0
5:30I	0	8	0	0	0	0	0	0	0
-24:30D	0	8	0	0	0	0	0	0	0
-1:23I	0	8	0	0	0	0	0	0	0
-33:50D	0	8	0	0	0	0	0	0	0
-13:23D	0	8	0	0	0	0	0	0	0
1:2I,3:1I	0	8	0	0	0	0	0	0	0
-3:1D,4:2I	0	8	0	0	0	0	0	0	0
-9:33I	0	8	0	0	0	0	0	0	0
-1:1D,4:1D	0	8	0	0	0	0	0	0	0
-6:3D,2:2D	0	8	0	0	0	0	0	0	0
1:66I	0	8	0	0	0	0	0	0	0
-4:6I,-1:1D	0	8	0	0	0	0	0	0	0
1:2I,4:13I	0	8	0	0	0	0	0	0	0
2:2I	0	8	0	0	0	0	0	0	0
-5:10I	0	1	1	0	0	0	0	6	0
1:1D,3:4I	0	0	8	0	0	0	0	0	0
-48:52D	0	0	7	0	0	0	0	0	1
-5:2D,-1:5D	0	0	2	0	6	0	0	0	0
-7:16D	0	0	8	0	0	0	0	0	0
-24:23D	0	0	8	0	0	0	0	0	0
-10:30I,-8:6I,-5:1D	0	0	8	0	0	0	0	0	0
-4:16I,-1:1D	0	0	8	0	0	0	0	0	0
-1:47I	0	0	3	0	0	0	0	5	0
-5:4I	0	0	0	0	8	0	0	0	0
-14:33I,-11:16I,-4:22I,-1:2I	0	0	0	0	8	0	0	0	0
1:1D,3:26I	0	0	0	0	8	0	0	0	0
-3:78I	0	0	0	0	8	0	0	0	0
-2:80I	0	0	0	0	7	1	0	0	0
-14:21I,-3:2D	0	0	0	0	8	0	0	0	0
-7:2D,-3:2D	0	0	0	0	8	0	0	0	0
-1:20I,4:9D	0	0	0	0	8	0	0	0	0
-11:9I,-4:22I,-1:5I	0	0	0	0	0	8	0	0	0
-12:27I,-6:25I,-3:2I	0	0	0	0	0	8	0	0	0
-2:26I	0	0	0	0	0	8	0	0	0
2:5I	0	0	0	0	0	8	0	0	0
-4:25I,-2:4I	0	0	0	0	0	8	0	0	0
-18:16D	0	0	0	0	0	2	0	6	0
1:1D,5:65I	0	0	0	0	0	0	0	8	0
-15:16I,-7:14I,1:2I	0	0	0	0	0	0	0	8	0
-5:1I,1:10D	0	0	0	0	0	0	0	8	0
-1:22I	0	0	0	0	0	0	0	8	0
-16:16D	0	0	0	0	0	0	0	8	0
-2:81I	0	0	0	0	0	0	0	8	0
-7:1I,-4:6D	0	0	0	0	0	0	0	0	8
-8:4D	0	0	0	0	0	0	0	0	8
-6:1I,-3:12D	0	0	0	0	0	0	0	0	8
4:1D	2	0	1	1	0	1	0	1	1
-11:4I,-1:19I	0	7	0	0	0	0	0	0	0
-3:54I,-1:8I	0	7	0	0	0	0	0	0	0
-2:34I	0	7	0	0	0	0	0	0	0
-18:23D	0	6	0	0	1	0	0	0	0
3:6D	0	7	0	0	0	0	0	0	0
-5:14D	0	7	0	0	0	0	0	0	0
-9:33I,-8:1D,-5:4D	0	7	0	0	0	0	0	0	0
-8:25D	0	7	0	0	0	0	0	0	0
-10:1D,-6:22I,-4:1I	0	7	0	0	0	0	0	0	0
-16:12D	0	7	0	0	0	0	0	0	0
-10:49D	0	7	0	0	0	0	0	0	0
-1:2D,6:2D	0	7	0	0	0	0	0	0	0
-4:40I	0	4	0	0	3	0	0	0	0
-2:22I	0	7	0	0	0	0	0	0	0
-15:21D	0	5	0	0	0	0	0	2	0
1:81I	0	7	0	0	0	0	0	0	0
-13:34D	0	7	0	0	0	0	0	0	0
-6:14I,1:14I	0	7	0	0	0	0	0	0	0
-13:6I	0	7	0	0	0	0	0	0	0
-19:23D	0	7	0	0	0	0	0	0	0
4:16I	0	7	0	0	0	0	0	0	0
-16:25D	0	7	0	0	0	0	0	0	0
-18:48D	0	0	7	0	0	0	0	0	0
-3:30D	0	0	7	0	0	0	0	0	0
-12:6D,4:1I	0	0	7	0	0	0	0	0	0
-9:24I,-5:4I	0	0	7	0	0	0	0	0	0
-5:1D,2:14I	0	0	7	0	0	0	0	0	0
-2:62I	0	0	7	0	0	0	0	0	0
-3:32D	0	0	7	0	0	0	0	0	0
-1:9I,4:6D	0	0	7	0	0	0	0	0	0
-8:16D	0	0	3	0	1	0	0	3	0
-4:9D	0	0	1	0	0	0	0	6	0
-13:28I,-2:1D	0	0	0	0	7	0	0	0	0
-1:68I	0	0	0	0	5	0	0	2	0
5:8D	0	0	0	0	7	0	0	0	0
-56:56D	0	0	0	0	7	0	0	0	0
-7:12I,1:15I,4:2D	0	0	0	0	7	0	0	0	0
-14:63I,-2:6I	0	0	0	0	0	7	0	0	0
5:4I	0	0	0	0	0	7	0	0	0
-15:41D	0	0	0	0	0	7	0	0	0
-4:10D	0	0	0	0	0	7	0	0	0
-4:39I	0	0	0	0	0	0	0	7	0
2:3D,6:33I	0	0	0	0	0	0	0	7	0
-16:29D	0	0	0	0	0	0	0	7	0
-14:46I,-3:2D	0	0	0	0	0	0	0	7	0
2:7I,6:12I	0	0	0	0	0	0	0	7	0
-3:75I	0	0	0	0	0	0	0	7	0
-5:52I	0	0	0	0	0	0	0	0	7
-11:16I,-1:29I	0	0	0	0	0	0	0	0	7
-17:17D	0	0	0	0	0	0	0	0	7
-2:55I	0	0	0	0	0	0	0	0	7
-3:61I	0	0	0	0	0	0	0	0	7
-21:19D	0	0	0	0	0	0	0	0	7
-19:19D,4:1D	0	0	0	0	0	0	0	0	7
-3:2D,4:4I,6:1I	0	0	0	0	0	0	0	0	7
-10:1D,-4:3D	0	0	0	0	0	0	0	0	7
-2:19I,1:8I	0	0	0	0	0	0	0	0	7
-16:9D	0	6	0	0	0	0	0	0	0
-3:79I	0	6	0	0	0	0	0	0	0
-12:1D,-8:8I,-3:10I	0	6	0	0	0	0	0	0	0
-3:17I,-1:16I	0	6	0	0	0	0	0	0	0
-13:9I,-8:2D,-3:18I	0	6	0	0	0	0	0	0	0
-13:17D	0	6	0	0	0	0	0	0	0
-16:21D	0	5	0	0	1	0	0	0	0
-4:2I	0	6	0	0	0	0	0	0	0
-10:1D,-1:1D	0	6	0	0	0	0	0	0	0
-3:45I,-1:4I	0	6	0	0	0	0	0	0	0
-9:3D,-3:2D	0	6	0	0	0	0	0	0	0
-10:74I,-3:6I	0	6	0	0	0	0	0	0	0
-3:7I,-1:1D	0	6	0	0	0	0	0	0	0
-13:15D	0	6	0	0	0	0	0	0	0
-21:18D	0	5	1	0	0	0	0	0	0
-12:29I,-4:3D	0	6	0	0	0	0	0	0	0
-10:35I,-3:16I,-1:8I	0	6	0	0	0	0	0	0	0
-15:31D	0	6	0	0	0	0	0	0	0
-30:29D	0	2	0	0	0	0	0	0	4
-6:9D	0	6	0	0	0	0	0	0	0
-4:15I,-1:1D	0	6	0	0	0	0	0	0	0
-3:11D	0	5	0	0	0	1	0	0	0
-10:32I,-4:8I,-2:2I	0	6	0	0	0	0	0	0	0
-11:15I,-3:6I,-1:1I	0	6	0	0	0	0	0	0	0
-4:19D	0	5	0	0	1	0	0	0	0
-4:23I,-1:1D	0	6	0	0	0	0	0	0	0
-57:61D	0	2	0	0	4	0	0	0	0
-2:46I	0	1	0	0	0	0	0	5	0
-3:82I	0	0	6	0	0	0	0	0	0
-16:43D	0	0	6	0	0	0	0	0	0
1:4I,6:2I	0	0	6	0	0	0	0	0	0
-3:27I	0	0	6	0	0	0	0	0	0
-45:63D	0	0	6	0	0	0	0	0	0
-34:37D	0	0	6	0	0	0	0	0	0
-22:48D	0	0	6	0	0	0	0	0	0
-2:31I	0	0	6	0	0	0	0	0	0
-8:2D	0	0	6	0	0	0	0	0	0
1:35I	0	0	6	0	0	0	0	0	0
4:2I	0	0	6	0	0	0	0	0	0
-7:1D	0	0	6	0	0	0	0	0	0
6:13I	0	0	6	0	0	0	0	0	0
2:14D	0	0	0	4	2	0	0	0	0
1:55I	0	0	0	0	6	0	0	0	0
-4:74I	0	0	0	0	6	0	0	0	0
-2:57I	0	0	0	0	6	0	0	0	0
-5:74I	0	0	0	0	6	0	0	0	0
-9:36I,-1:25I	0	0	0	0	6	0	0	0	0
-8:8I	0	0	0	0	6	0	0	0	0
-10:3I,-6:1D	0	0	0	0	6	0	0	0	0
-10:4D,-2:26I	0	0	0	0	6	0	0	0	0
-3:6I	0	0	0	0	6	0	0	0	0
-9:17D	0	0	0	0	6	0	0	0	0
1:39I	0	0	0	0	1	0	0	5	0
-11:10I,-8:39I,-5:24I,-1:5I	0	0	0	0	6	0	0	0	0
-1:57I	0	0	0	0	3	3	0	0	0
-2:79I	0	0	0	0	3	0	0	3	0
-16:36D	0	0	0	0	6	0	0	0	0
-5:19D	0	0	0	0	5	0	0	0	1
-8:2I,-3:2D	0	0	0	0	6	0	0	0	0
-14:21D	0	0	0	0	1	5	0	0	0
-8:14D	0	0	0	0	0	6	0	0	0
-1:60I	0	0	0	0	0	6	0	0	0
-4:79I	0	0	0	0	0	6	0	0	0
-38:53D	0	0	0	0	0	6	0	0	0
-11:24D	0	0	0	0	0	6	0	0	0
1:48I,5:1I	0	0	0	0	0	0	0	6	0
-3:72I	0	0	0	0	0	0	0	6	0
-17:35D	0	0	0	0	0	0	0	6	0
-6:76I,-4:3I	0	0	0	0	0	0	0	6	0
-4:66I,4:6I	0	0	0	0	0	0	0	6	0
1:69I	0	0	0	0	0	0	0	6	0
-12:25D	0	0	0	0	0	0	0	6	0
2:62I,5:12I	0	0	0	0	0	0	0	6	0
-3:2D,5:1D	0	0	0	0	0	0	0	0	6
1:14I,5:23I	0	0	0	0	0	0	0	0	6
-14:32D	0	5	0	0	0	0	0	0	0
-22:38D	0	5	0	0	0	0	0	0	0
1:1I,2:7D	0	5	0	0	0	0	0	0	0
-7:11I,-3:2D	0	5	0	0	0	0	0	0	0
5:6I	0	5	0	0	0	0	0	0	0
3:1I	0	5	0	0	0	0	0	0	0
-18:17D	0	5	0	0	0	0	0	0	0
-10:26D	0	5	0	0	0	0	0	0	0
-14:3D,-7:1D,-1:22I	0	5	0	0	0	0	0	0	0
2:16I	0	5	0	0	0	0	0	0	0
-1:3D,5:6I	0	5	0	0	0	0	0	0	0
-5:19I,-3:2D	0	5	0	0	0	0	0	0	0
-12:18I,-8:8I,-5:1I	0	5	0	0	0	0	0	0	0
-30:36D	0	5	0	0	0	0	0	0	0
-15:49D	0	5	0	0	0	0	0	0	0
-1:11I,6:5I	0	5	0	0	0	0	0	0	0
4:2D	0	3	0	0	0	1	0	0	1
-5:13I	0	2	0	0	0	0	0	3	0
-14:11I	0	5	0	0	0	0	0	0	0
-8:2D,-1:28I	0	0	5	0	0	0	0	0	0
-16:13D	0	0	4	0	1	0	0	0	0
-43:51D	0	0	3	0	0	1	0	0	1
-3:27D	0	0	4	0	0	0	0	0	1
-3:16I	0	0	0	5	0	0	0	0	0
-28:40D	0	0	0	0	5	0	0	0	0
-4:65I	0	0	0	0	5	0	0	0	0
-3:7I,-1:6I	0	0	0	0	5	0	0	0	0
-12:26D	0	0	0	0	5	0	0	0	0
-10:19I,-2:1I	0	0	0	0	5	0	0	0	0
-2:3D	0	0	0	0	5	0	0	0	0
-3:6I,-1:4I	0	0	0	0	5	0	0	0	0
-2:35I	0	0	0	0	4	0	0	0	1
-13:14I,-9:2I,-2:4I	0	0	0	0	5	0	0	0	0
2:12D	0	0	0	0	5	0	0	0	0
-1:46I	0	0	0	0	3	0	0	0	2
-6:20I,-1:7I	0	0	0	0	5	0	0	0	0
-10:1D,-7:5I	0	0	0	0	0	5	0	0	0
1:6I,3:3I	0	0	0	0	0	5	0	0	0
2:10I,5:9D	0	0	0	0	0	5	0	0	0
1:27I	0	0	0	0	0	5	0	0	0
-58:65D	0	0	0	0	0	5	0	0	0
-9:36D	0	0	0	0	0	5	0	0	0
6:4I	0	0	0	0	0	5	0	0	0
-9:38D	0	0	0	0	0	0	0	5	0
-13:42D	0	0	0	0	0	0	0	5	0
-4:13D	0	0	0	0	0	0	0	5	0
-11:24I,-6:21I	0	0	0	0	0	0	0	5	0
-26:31D	0	0	0	0	0	0	0	5	0
-6:22I,-4:1I	0	0	0	0	0	0	0	5	0
-46:59D	0	0	0	0	0	0	0	5	0
2:15D	0	0	0	0	0	0	0	5	0
-8:8I,-4:6I,5:10I	0	0	0	0	0	0	0	5	0
-2:2D,5:1D	0	0	0	0	0	0	0	5	0
-7:52I,-4:2I	0	0	0	0	0	0	0	5	0
-5:6I	0	0	0	0	0	0	0	0	5
1:19D	0	0	0	0	0	0	0	0	5
1:3I,5:2I	0	0	0	0	0	0	0	0	5
1:47I	0	0	0	0	0	0	0	0	5
-4:62I	0	0	0	0	0	0	0	0	5
-32:32D	0	0	0	0	0	0	0	0	5
-10:5D,-2:22I	0	0	0	0	0	0	0	0	5
5:1D	0	2	2	0	0	0	0	0	0
-4:1I,1:11I	0	4	0	0	0	0	0	0	0
-36:34D	0	2	2	0	0	0	0	0	0
-7:48I,-5:17I	0	4	0	0	0	0	0	0	0
-3:2I,-1:50I	0	4	0	0	0	0	0	0	0
-2:83I	0	4	0	0	0	0	0	0	0
-3:28D	0	4	0	0	0	0	0	0	0
-9:6I,-6:4I,-2:18I,5:2I	0	4	0	0	0	0	0	0	0
-10:5D,1:4I	0	4	0	0	0	0	0	0	0
-12:32D	0	4	0	0	0	0	0	0	0
-15:1D,-7:7D	0	4	0	0	0	0	0	0	0
-4:1I	0	4	0	0	0	0	0	0	0
-24:29D	0	4	0	0	0	0	0	0	0
-12:1D,-8:7I,-3:1D	0	4	0	0	0	0	0	0	0
-5:26I	0	4	0	0	0	0	0	0	0
-5:43I,-2:8I	0	4	0	0	0	0	0	0	0
-10:49I,-8:13I,1:18I	0	4	0	0	0	0	0	0	0
1:31I,3:1D	0	4	0	0	0	0	0	0	0
-1:2D,4:3D	0	4	0	0	0	0	0	0	0
-10:13I,-6:28I,-1:12I	0	4	0	0	0	0	0	0	0
-18:42D	0	2	0	0	0	2	0	0	0
-14:5D,-1:5D	0	0	4	0	0	0	0	0	0
-34:40D	0	0	4	0	0	0	0	0	0
1:76I	0	0	4	0	0	0	0	0	0
-33:36D	0	0	3	0	0	0	0	0	1
-12:23D	0	0	4	0	0	0	0	0	0
1:79I	0	0	4	0	0	0	0	0	0
-11:17D	0	0	4	0	0	0	0	0	0
-18:28D	0	0	4	0	0	0	0	0	0
-3:8I,-1:1D	0	0	4	0	0	0	0	0	0
-17:22D	0	0	0	0	4	0	0	0	0
-13:16I,-11:3I,-9:1I,-1:53I	0	0	0	0	4	0	0	0	0
-10:20I,-3:10I	0	0	0	0	4	0	0	0	0
-4:44I	0	0	0	0	4	0	0	0	0
-8:18I	0	0	0	0	4	0	0	0	0
-7:5I	0	0	0	0	4	0	0	0	0
1:22D	0	0	0	0	4	0	0	0	0
-5:62I,-2:1D	0	0	0	0	4	0	0	0	0
1:17I,5:9I	0	0	0	0	4	0	0	0	0
-25:39D	0	0	0	0	4	0	0	0	0
-1:35I,4:2I	0	0	0	0	4	0	0	0	0
-21:39D	0	0	0	0	2	0	0	2	0
-6:17D	0	0	0	0	4	0	0	0	0
-4:41D	0	0	0	0	4	0	0	0	0
-1:85I	0	0	0	0	1	3	0	0	0
-2:35D	0	0	0	0	0	4	0	0	0
-34:48D	0	0	0	0	0	4	0	0	0
-6:64I	0	0	0	0	0	4	0	0	0
2:19I	0	0	0	0	0	4	0	0	0
-5:2D,-2:4I	0	0	0	0	0	4	0	0	0
-2:11I	0	0	0	0	0	0	4	0	0
-6:14I,1:8I	0	0	0	0	0	0	0	4	0
-1:98I	0	0	0	0	0	0	0	4	0
-5:7I	0	0	0	0	0	0	0	3	1
-3:55I,-1:2I	0	0	0	0	0	0	0	4	0
-8:5D,-1:1D	0	0	0	0	0	0	0	4	0
1:21I,6:16I	0	0	0	0	0	0	0	4	0
-7:5D,2:1D	0	0	0	0	0	0	0	4	0
-11:31D	0	0	0	0	0	0	0	4	0
-11:9I,-9:8I,-1:5I	0	0	0	0	0	0	0	4	0
-18:9D,-6:13D	0	0	0	0	0	0	0	4	0
3:1D	0	0	0	0	0	0	0	4	0
-2:5D	0	0	0	0	0	0	0	4	0
1:34D	0	0	0	0	0	0	0	4	0
-10:2D,1:1I	0	0	0	0	0	0	0	4	0
-2:14I	0	0	0	0	0	0	0	0	4
-3:19D	0	0	0	0	0	0	0	0	4
1:11I,5:7I	0	0	0	0	0	0	0	0	4
-37:48D	0	0	0	0	0	0	0	0	4
-1:91I	2	0	0	0	1	0	0	0	0
1:50I,6:2I	0	3	0	0	0	0	0	0	0
-35:48D	0	3	0	0	0	0	0	0	0
-5:1I,2:16D	0	3	0	0	0	0	0	0	0
-18:20D	0	3	0	0	0	0	0	0	0
2:26D	0	3	0	0	0	0	0	0	0
4:16D	0	3	0	0	0	0	0	0	0
-3:10I,-1:1D	0	3	0	0	0	0	0	0	0
-5:2D	0	1	0	0	0	0	0	0	2
-4:73I	0	1	0	0	0	0	0	2	0
-23:31D	0	3	0	0	0	0	0	0	0
-3:66I	0	3	0	0	0	0	0	0	0
-19:28D	0	3	0	0	0	0	0	0	0
-19:24D	0	3	0	0	0	0	0	0	0
-45:48D	0	3	0	0	0	0	0	0	0
-17:20D	0	1	0	0	2	0	0	0	0
-3:20I,-2:1D	0	1	2	0	0	0	0	0	0
1:16I	0	0	3	0	0	0	0	0	0
5:4D	0	0	3	0	0	0	0	0	0
-7:4D,-1:1I	0	0	3	0	0	0	0	0	0
-2:91I	0	0	1	0	0	0	0	0	2
-2:15I	0	0	0	0	3	0	0	0	0
1:16I,5:16I	0	0	0	0	3	0	0	0	0
-3:8D	0	0	0	0	3	0	0	0	0
-11:37D	0	0	0	0	3	0	0	0	0
-1:5I,1:1D,5:5D	0	0	0	0	3	0	0	0	0
-7:13D	0	0	0	0	3	0	0	0	0
-3:9I,-1:1D	0	0	0	0	3	0	0	0	0
-3:64I	0	0	0	0	3	0	0	0	0
-3:14I	0	0	0	0	3	0	0	0	0
-48:53D	0	0	0	0	3	0	0	0	0
-40:41D	0	0	0	0	3	0	0	0	0
-11:22I,-5:2D,1:1I	0	0	0	0	3	0	0	0	0
2:72I	0	0	0	0	3	0	0	0	0
-1:94I	0	0	0	0	3	0	0	0	0
-6:22I,1:1I	0	0	0	0	3	0	0	0	0
-13:13D	0	0	0	0	3	0	0	0	0
-35:38D	0	0	0	0	3	0	0	0	0
-10:4D,-3:2D	0	0	0	0	1	2	0	0	0
-9:14I,-1:44I	0	0	0	0	3	0	0	0	0
1:24I	0	0	0	0	0	1	0	0	2
-10:2D,-3:2D	0	0	0	0	0	3	0	0	0
2:33I	0	0	0	0	0	3	0	0	0
1:75I,4:4I	0	0	0	0	0	3	0	0	0
-54:58D	0	0	0	0	0	3	0	0	0
2:61I	0	0	0	0	0	3	0	0	0
-16:27D	0	0	0	0	0	3	0	0	0
-24:36D	0	0	0	0	0	0	0	3	0
-4:14I,1:8I	0	0	0	0	0	0	0	3	0
-3:54I,-1:2I	0	0	0	0	0	0	0	3	0
-5:13D	0	0	0	0	0	0	0	3	0
-27:16D,1:5D	0	0	0	0	0	0	0	3	0
-32:33D	0	0	0	0	0	0	0	3	0
-3:36I	0	0	0	0	0	0	0	3	0
-5:9I	0	0	0	0	0	0	0	3	0
-4:27D	0	0	0	0	0	0	0	3	0
-15:24D	0	0	0	0	0	0	0	3	0
-3:90I	0	0	0	0	0	0	0	0	3
-7:3I,-1:18I	0	0	0	0	0	0	0	0	3
1:19I,5:40I	0	0	0	0	0	0	0	0	3
1:49I	0	0	0	0	0	0	0	0	3
-7:11I,-1:20I	0	0	0	0	0	0	0	0	3
-2:78I	0	0	0	0	0	0	0	0	3
4:1I	0	0	0	0	0	0	0	0	3
-3:2D,4:16D	0	0	0	0	0	0	0	0	3
-8:54I,-4:8I	0	0	0	0	0	0	0	0	3
3:26I	0	0	0	0	0	0	0	0	3
-1:55I	0	0	0	0	0	0	0	0	3
-11:2D	0	1	0	0	0	0	0	1	0
-3:19I,-2:1D	0	2	0	0	0	0	0	0	0
-3:99I	0	2	0	0	0	0	0	0	0
-18:9D,-6:3D	0	2	0	0	0	0	0	0	0
-6:1I,-3:2D	0	2	0	0	0	0	0	0	0
-24:17D	0	2	0	0	0	0	0	0	0
-8:11D	0	2	0	0	0	0	0	0	0
2:8I,4:7D	0	1	0	0	0	0	0	1	0
2:3I	0	2	0	0	0	0	0	0	0
-5:45I	0	2	0	0	0	0	0	0	0
4:59I	0	2	0	0	0	0	0	0	0
-5:8D	0	2	0	0	0	0	0	0	0
-1:4D,5:13I	0	0	2	0	0	0	0	0	0
-6:51I,-4:1I,-1:27I	0	0	2	0	0	0	0	0	0
-8:1D	0	0	2	0	0	0	0	0	0
-11:1D	0	0	1	1	0	0	0	0	0
-27:33D	0	0	0	0	2	0	0	0	0
-21:24D	0	0	0	0	2	0	0	0	0
-2:70I	0	0	0	0	2	0	0	0	0
-7:5D	0	0	0	0	2	0	0	0	0
-12:21D	0	0	0	0	2	0	0	0	0
-11:1I,-10:8D	0	0	0	0	2	0	0	0	0
-1:19D	0	0	0	0	2	0	0	0	0
-3:8I	0	0	0	0	2	0	0	0	0
-7:10I,-4:46I,-1:10I	0	0	0	0	2	0	0	0	0
-2:56I,1:14I	0	0	0	0	2	0	0	0	0
-7:4I,-4:25I	0	0	0	0	2	0	0	0	0
-2:89I	0	0	0	0	2	0	0	0	0
-13:40D	0	0	0	0	2	0	0	0	0
-8:3I	0	0	0	0	2	0	0	0	0
-10:45I,-6:24I,-2:5I	0	0	0	0	2	0	0	0	0
-11:4D,-4:3D	0	0	0	0	2	0	0	0	0
1:25I	0	0	0	0	2	0	0	0	0
-10:2D,-5:23I,-2:9I	0	0	0	0	2	0	0	0	0
-3:53I	0	0	0	0	2	0	0	0	0
-12:1D	0	0	0	0	1	0	0	0	1
-1:28I	0	0	0	0	2	0	0	0	0
-12:10I,-10:5I,-7:17I,-4:3I,-1:8I	0	0	0	0	2	0	0	0	0
-10:21I,-1:7I	0	0	0	0	2	0	0	0	0
-7:5I,-3:2D	0	0	0	0	0	2	0	0	0
-6:31D	0	0	0	0	0	2	0	0	0
-1:87I	0	0	0	0	0	2	0	0	0
-11:13I,-9:18I,-6:3I,-3:2D	0	0	0	0	0	2	0	0	0
1:30I,2:3D	0	0	0	0	0	2	0	0	0
-54:62D	0	0	0	0	0	2	0	0	0
4:3D	0	0	0	0	0	0	1	0	1
-13:41I,-6:1I,-1:17I	0	0	0	0	0	0	0	2	0
-3:4D,5:9D	0	0	0	0	0	0	0	2	0
-3:4I	0	0	0	0	0	0	0	2	0
-4:2D	0	0	0	0	0	0	0	2	0
-7:18I	0	0	0	0	0	0	0	2	0
-6:16D	0	0	0	0	0	0	0	2	0
4:13D	0	0	0	0	0	0	0	2	0
-17:31D	0	0	0	0	0	0	0	2	0
-18:43D	0	0	0	0	0	0	0	2	0
-32:52D	0	0	0	0	0	0	0	2	0
-3:52I,-1:2I	0	0	0	0	0	0	0	2	0
-33:44D	0	0	0	0	0	0	0	2	0
-3:69I	0	0	0	0	0	0	0	2	0
-8:21I,-1:10I	0	0	0	0	0	0	0	0	2
-23:36D	0	0	0	0	0	0	0	0	2
-5:51I	0	0	0	0	0	0	0	0	2
-36:37D	0	0	0	0	0	0	0	0	2
1:60I,3:6I	0	0	0	0	0	0	0	0	2
-6:2D,1:9D	1	0	0	0	0	0	0	0	0
3:1D,6:36I	1	0	0	0	0	0	0	0	0
-4:4I,-1:1D	0	1	0	0	0	0	0	0	0
-3:52I	0	1	0	0	0	0	0	0	0
-12:1D,-9:45I,-5:29I,-1:3I	0	1	0	0	0	0	0	0	0
2:42I	0	1	0	0	0	0	0	0	0
-8:1I,-2:2I	0	1	0	0	0	0	0	0	0
-3:23I,-2:1D	0	1	0	0	0	0	0	0	0
-6:14I,1:50I,3:16I	0	1	0	0	0	0	0	0	0
3:11I	0	1	0	0	0	0	0	0	0
-5:28I	0	1	0	0	0	0	0	0	0
2:3I,5:1D	0	1	0	0	0	0	0	0	0
-13:47I,-4:11I,-1:2I	0	1	0	0	0	0	0	0	0
-5:25I	0	1	0	0	0	0	0	0	0
-7:6I,-3:1D	0	1	0	0	0	0	0	0	0
-8:16I,-1:8I	0	1	0	0	0	0	0	0	0
-4:7I	0	1	0	0	0	0	0	0	0
-7:71I,-4:2I,-1:8I	0	1	0	0	0	0	0	0	0
-5:22I,-2:1D	0	1	0	0	0	0	0	0	0
2:11I,4:2I	0	1	0	0	0	0	0	0	0
-5:29I	0	1	0	0	0	0	0	0	0
-5:27I	0	1	0	0	0	0	0	0	0
-15:1D,-1:1I	0	1	0	0	0	0	0	0	0
-12:6D	0	1	0	0	0	0	0	0	0
-21:12D,-3:2D	0	1	0	0	0	0	0	0	0
-13:3D	0	1	0	0	0	0	0	0	0
-7:3D,1:12D	0	1	0	0	0	0	0	0	0
-9:44I,-5:20I	0	1	0	0	0	0	0	0	0
-3:98I	0	1	0	0	0	0	0	0	0
-2:92I	0	1	0	0	0	0	0	0	0
1:70I,4:29I	0	1	0	0	0	0	0	0	0
1:1D,3:28I	0	1	0	0	0	0	0	0	0
-20:31D	0	0	1	0	0	0	0	0	0
-3:21I,-2:1D	0	0	1	0	0	0	0	0	0
-13:59I,-10:25I,-7:1D	0	0	1	0	0	0	0	0	0
2:1I,4:3D	0	0	1	0	0	0	0	0	0
-13:29I,-6:54I	0	0	1	0	0	0	0	0	0
-35:41D	0	0	1	0	0	0	0	0	0
6:7I	0	0	1	0	0	0	0	0	0
2:1D,4:4I	0	0	1	0	0	0	0	0	0
-14:10D	0	0	1	0	0	0	0	0	0
-6:6I,1:9I	0	0	1	0	0	0	0	0	0
-48:51D	0	0	1	0	0	0	0	0	0
-3:17I,-2:1D	0	0	1	0	0	0	0	0	0
-10:15I,-1:5I	0	0	1	0	0	0	0	0	0
-5:5D,4:2D	0	0	0	1	0	0	0	0	0
-13:4D,-5:4D	0	0	0	0	1	0	0	0	0
-3:86I	0	0	0	0	1	0	0	0	0
-5:2D,4:1I,5:2D	0	0	0	0	1	0	0	0	0
-4:28I	0	0	0	0	1	0	0	0	0
-8:71I	0	0	0	0	1	0	0	0	0
-12:13I,-1:17I	0	0	0	0	1	0	0	0	0
-1:100I	0	0	0	0	1	0	0	0	0
-14:53I,-12:1D,-6:11I,-1:7I	0	0	0	0	1	0	0	0	0
-13:1D	0	0	0	0	1	0	0	0	0
-1:28I,4:4I,6:2D	0	0	0	0	1	0	0	0	0
-6:1D,1:4I	0	0	0	0	1	0	0	0	0
-8:27I,-3:20I	0	0	0	0	1	0	0	0	0
-5:25D	0	0	0	0	1	0	0	0	0
-4:30I	0	0	0	0	1	0	0	0	0
1:89I	0	0	0	0	1	0	0	0	0
1:47I,5:14I	0	0	0	0	0	1	0	0	0
5:13I	0	0	0	0	0	1	0	0	0
-8:9D	0	0	0	0	0	1	0	0	0
-13:21D	0	0	0	0	0	0	1	0	0
-2:17I	0	0	0	0	0	0	0	1	0
-3:56I,-1:2I	0	0	0	0	0	0	0	1	0
1:8I,3:4D	0	0	0	0	0	0	0	1	0
-8:8D,2:1I	0	0	0	0	0	0	0	1	0
-1:2I,3:42I	0	0	0	0	0	0	0	1	0
-5:35I,-2:24I	0	0	0	0	0	0	0	1	0
-11:1D,-1:1I	0	0	0	0	0	0	0	1	0
-2:68I	0	0	0	0	0	0	0	1	0
-29:29D	0	0	0	0	0	0	0	1	0
-8:41I,-4:24I,-1:3I	0	0	0	0	0	0	0	1	0
4:1D,6:17I	0	0	0	0	0	0	0	1	0
-3:53I,-1:2I	0	0	0	0	0	0	0	1	0
-3:57I,-1:2I	0	0	0	0	0	0	0	1	0
-3:51I,-1:2I	0	0	0	0	0	0	0	1	0
1:43I,4:9I	0	0	0	0	0	0	0	1	0
-7:16I,-4:25I,-1:13I	0	0	0	0	0	0	0	1	0
-15:6I,-2:83I	0	0	0	0	0	0	0	1	0
-3:40I,2:38I	0	0	0	0	0	0	0	1	0
1:37I	0	0	0	0	0	0	0	1	0
-5:46I	0	0	0	0	0	0	0	1	0
-5:8I	0	0	0	0	0	0	0	1	0
2:52I,5:13I	0	0	0	0	0	0	0	1	0
5:21I	0	0	0	0	0	0	0	0	1
-1:97I	0	0	0	0	0	0	0	0	1
-5:53I	0	0	0	0	0	0	0	0	1
-9:20I,-6:59I	0	0	0	0	0	0	0	0	1
3:34I	0	0	0	0	0	0	0	0	1
-3:23I,-1:10I	0	0	0	0	0	0	0	0	1
-2:13I,2:8I	0	0	0	0	0	0	0	0	1
-6:14I,1:5I	0	0	0	0	0	0	0	0	1
Other	5	662	313	9	427	354	16	1123	353

## Sheet: Reporter_mutRFP-Off_target-1
Sample	I.NT	I.RNP...65mer.unco...SpCas9.WT.	I.RNPD...65mer.coup...SpCas9.SNAP.	II.NT	II.RNP...65mer.unco...SpCas9.WT.	II.RNPD...65mer.coup...SpCas9.SNAP.	III.NT	III.RNP...65mer.unco...SpCas9.WT.	III.RNPD...65mer.coup...SpCas9.SNAP.
no variant	205175	142426	237252	144149	150456	305050	93001	106614	518793
SNV:-15T	102	71	99	70	62	139	28	42	201
SNV:-3A	97	78	119	51	70	164	23	30	153
SNV:4T	99	54	94	78	67	113	25	44	165
SNV:-8A	87	52	98	60	64	132	28	33	148
SNV:3C	65	70	73	81	73	81	23	45	181
SNV:5T	65	56	71	53	37	86	23	24	161
SNV:-7G	70	49	79	46	50	92	12	34	136
SNV:-2G	73	54	81	59	37	74	16	45	121
SNV:-4C	61	51	61	49	29	88	19	44	156
SNV:-10G	62	51	62	54	40	85	21	33	123
SNV:-12A	55	47	59	37	48	111	22	28	115
SNV:-9A	58	40	67	30	47	83	23	36	109
SNV:-14T	61	41	63	39	42	82	18	29	114
SNV:-1C	38	27	74	39	28	57	20	39	124
SNV:6T	55	37	57	29	47	62	21	24	86
SNV:-11C	54	26	47	37	25	63	14	33	107
SNV:2A	48	33	55	33	42	73	19	12	83
SNV:-5A	57	38	53	26	31	73	19	24	74
SNV:-13T	34	14	47	22	30	70	13	23	77
SNV:-15A	33	26	47	35	30	40	11	23	79
SNV:-6T	20	23	43	21	24	33	19	24	109
SNV:1T	39	29	39	22	21	43	21	13	88
SNV:-14A	36	24	28	23	34	52	13	24	71
SNV:4A	22	14	31	15	24	34	9	12	49
SNV:1A	24	11	36	20	13	37	4	10	43
SNV:2T	18	15	28	20	16	31	11	7	46
SNV:-3T	20	13	20	13	18	21	8	9	66
SNV:5A	26	20	22	18	11	35	2	9	39
SNV:6A	29	22	19	12	10	28	7	9	37
SNV:-13A	17	13	25	8	14	30	9	10	44
SNV:-8T	15	10	19	15	12	39	10	11	39
SNV:-12T	25	11	17	13	17	24	5	7	46
SNV:-10T	23	16	17	10	13	21	7	12	43
SNV:-6A	18	8	12	18	9	22	3	10	33
SNV:-9T	11	7	13	10	9	15	9	10	32
SNV:-5T	13	11	14	12	6	13	3	5	37
SNV:-2T	10	7	13	5	14	11	11	8	22
SNV:-4A	16	5	16	6	4	12	2	5	20
SNV:-12G	8	7	14	8	6	12	4	9	14
SNV:4C	6	0	10	9	5	10	2	8	16
SNV:-11A	5	7	7	6	5	13	4	7	10
SNV:-1A	9	2	1	6	11	10	1	6	17
SNV:-15C	2	3	10	2	6	13	2	5	20
SNV:-14C	9	4	12	3	6	5	1	2	20
SNV:-3G	5	5	11	7	6	5	1	8	14
SNV:-8G	7	3	10	3	5	7	5	0	16
SNV:5C	6	7	5	2	2	8	4	1	21
SNV:2G	14	6	8	3	2	7	2	2	9
SNV:-9G	7	3	11	6	5	9	0	4	6
SNV:1C	4	7	5	6	2	8	0	4	12
SNV:-7T	5	6	9	4	0	7	0	3	9
SNV:3A	1	4	3	8	3	9	5	3	5
SNV:6C	4	5	4	2	2	11	1	1	11
SNV:-13C	3	4	4	2	6	6	1	5	5
SNV:-5G	4	3	6	6	1	1	3	1	9
SNV:-6C	10	2	5	2	1	3	0	0	9
SNV:-2C	8	1	6	2	2	4	0	1	8
SNV:-7C	2	3	4	5	2	0	1	2	3
SNV:-4G	2	1	2	3	2	3	1	1	6
SNV:-10C	2	3	5	0	2	1	1	0	2
SNV:-11G	4	2	1	1	1	1	0	1	4
SNV:3G	2	0	1	0	2	1	1	3	5
SNV:-1G	1	1	1	2	3	1	0	0	2
SNV:-6T,-12A,-13T	1	0	0	0	0	1	0	0	3
SNV:-8A,-14T	0	0	1	0	1	2	0	0	1
SNV:2A,-8A	1	0	2	0	1	0	0	0	0
SNV:1T,-12A	0	0	2	1	1	0	0	0	0
SNV:-7G,-8A	1	0	1	0	1	0	0	0	0
SNV:2A,-12A	1	0	0	0	0	0	2	0	0
SNV:3G,2A	1	0	0	1	0	0	0	1	0
SNV:-5A,-8A	1	0	0	0	0	1	0	1	0
SNV:-5A,-12A	1	0	1	0	0	1	0	0	0
SNV:-9A,-12A	0	0	0	2	0	0	0	1	0
SNV:6T,-13T	0	0	0	0	1	0	1	0	1
SNV:3G,2A,-1G	2	0	0	0	0	0	0	0	0
SNV:6T,5T	2	0	0	0	0	0	0	0	0
SNV:-8A,-14A	1	0	1	0	0	0	0	0	0
SNV:5T,4T	1	0	0	0	0	0	0	0	1
SNV:-3A,-8A	2	0	0	0	0	0	0	0	0
SNV:4T,-4C	1	0	1	0	0	0	0	0	0
SNV:-8A,-9A,-11A	1	0	0	0	0	1	0	0	0
SNV:3C,-5A	1	0	0	0	0	0	0	0	1
SNV:5T,-3A	1	0	0	1	0	0	0	0	0
SNV:6T,-12A	1	0	0	0	0	0	0	0	1
SNV:6T,4T,-12A,-13T	1	0	0	0	0	1	0	0	0
SNV:-8A,-9A,-11A,-12G	1	0	0	0	0	1	0	0	0
SNV:4T,-6T	1	0	0	0	0	0	1	0	0
SNV:-9A,-14T	0	1	0	0	0	0	0	1	0
SNV:-12A,-15A	0	1	0	0	0	1	0	0	0
SNV:-1C,-11C	0	1	0	0	0	0	0	1	0
SNV:3C,2T	0	1	1	0	0	0	0	0	0
SNV:-8A,-15A	0	1	1	0	0	0	0	0	0
SNV:3C,-8A	0	1	0	0	0	0	0	0	1
SNV:-12A,-14T	0	2	0	0	0	0	0	0	0
SNV:2A,-3A	0	1	0	0	0	1	0	0	0
SNV:6T,2A,-13T	0	1	0	0	0	0	0	0	1
SNV:2T,-8A	0	0	1	0	0	0	0	0	1
SNV:5A,4T	0	0	1	0	0	1	0	0	0
SNV:-8A,-15T	0	0	2	0	0	0	0	0	0
SNV:5T,-6T	0	0	1	0	0	1	0	0	0
SNV:-4C,-15T	0	0	1	0	0	0	0	0	1
SNV:3C,-4C	0	0	0	2	0	0	0	0	0
SNV:-7G,-10G	0	0	0	1	0	0	0	0	1
SNV:-5G,-11A	0	0	0	1	0	1	0	0	0
SNV:-1C,-13T	0	0	0	1	0	0	0	0	1
SNV:3C,1A	0	0	0	1	0	1	0	0	0
SNV:4T,-14T	0	0	0	1	0	1	0	0	0
SNV:6T,5T,4T	0	0	0	0	1	1	0	0	0
SNV:5T,4T,-12A	0	0	0	0	1	0	0	0	1
SNV:6T,1T	0	0	0	0	0	1	0	0	1
SNV:1T,-6T,-12A	0	0	0	0	0	1	1	0	0
SNV:-13A,-14C	0	0	0	0	0	1	0	0	1
SNV:2A,-9A	0	0	0	0	0	1	0	0	1
SNV:1T,-13T	0	0	0	0	0	0	1	1	0
SNV:-5G,-13A,-14T	0	0	0	0	0	0	1	0	1
SNV:5T,2A	0	0	0	0	0	0	0	1	1
SNV:-5A,-7T	0	0	0	0	0	0	0	0	2
SNV:6T,-5A,-13T	0	0	0	0	0	0	0	0	2
SNV:-1C,-15T	1	0	0	0	0	0	0	0	0
SNV:6T,2A,-5A,-6T	1	0	0	0	0	0	0	0	0
SNV:-9G,-12A,-14A	1	0	0	0	0	0	0	0	0
SNV:2A,1A	1	0	0	0	0	0	0	0	0
SNV:3A,-8A	1	0	0	0	0	0	0	0	0
SNV:5C,4C	1	0	0	0	0	0	0	0	0
SNV:5A,2A,1A	1	0	0	0	0	0	0	0	0
SNV:-6A,-14A	1	0	0	0	0	0	0	0	0
SNV:6A,4T	1	0	0	0	0	0	0	0	0
SNV:5T,-2T,-6T	1	0	0	0	0	0	0	0	0
SNV:2A,-14C	1	0	0	0	0	0	0	0	0
SNV:5T,2A,-8A,-12A,-15T	1	0	0	0	0	0	0	0	0
SNV:-11C,-15T	1	0	0	0	0	0	0	0	0
SNV:4A,-7G	1	0	0	0	0	0	0	0	0
SNV:1A,-12T	1	0	0	0	0	0	0	0	0
SNV:4T,-9A	1	0	0	0	0	0	0	0	0
SNV:-4C,-8T	1	0	0	0	0	0	0	0	0
SNV:3G,-1G	1	0	0	0	0	0	0	0	0
SNV:-3A,-8A,-13A	1	0	0	0	0	0	0	0	0
SNV:-6T,-7C	1	0	0	0	0	0	0	0	0
SNV:-10G,-12A	1	0	0	0	0	0	0	0	0
SNV:5A,-14A,-15A	0	1	0	0	0	0	0	0	0
SNV:-9A,-12G	0	1	0	0	0	0	0	0	0
SNV:-12T,-13T	0	1	0	0	0	0	0	0	0
SNV:4A,-3A	0	1	0	0	0	0	0	0	0
SNV:-1A,-6A	0	1	0	0	0	0	0	0	0
SNV:6T,5T,-3A,-4G,-5A,-9A,-14T,-15T	0	1	0	0	0	0	0	0	0
SNV:-8A,-9G	0	1	0	0	0	0	0	0	0
SNV:-2G,-8A	0	1	0	0	0	0	0	0	0
SNV:-5A,-14C	0	1	0	0	0	0	0	0	0
SNV:5T,-14A	0	1	0	0	0	0	0	0	0
SNV:3C,2A	0	1	0	0	0	0	0	0	0
SNV:1A,-2C	0	1	0	0	0	0	0	0	0
SNV:5A,2A	0	1	0	0	0	0	0	0	0
SNV:-9A,-12G,-14C	0	1	0	0	0	0	0	0	0
SNV:5T,-5G,-14T	0	1	0	0	0	0	0	0	0
SNV:-5G,-13A,-14C	0	1	0	0	0	0	0	0	0
SNV:-2G,-3A	0	1	0	0	0	0	0	0	0
SNV:-9A,-11A,-13A,-14C	0	1	0	0	0	0	0	0	0
SNV:1A,-3A,-8A,-11A,-14T	0	1	0	0	0	0	0	0	0
SNV:-1G,-3A,-4C,-5T	0	1	0	0	0	0	0	0	0
SNV:-5G,-8A,-11A	0	1	0	0	0	0	0	0	0
SNV:4T,-7C,-9T,-14T	0	1	0	0	0	0	0	0	0
SNV:2A,-2T	0	1	0	0	0	0	0	0	0
SNV:2A,-10G	0	1	0	0	0	0	0	0	0
SNV:5A,-5A	0	1	0	0	0	0	0	0	0
SNV:-3A,-12A	0	1	0	0	0	0	0	0	0
SNV:-10G,-15A	0	1	0	0	0	0	0	0	0
SNV:5T,2A,-3A,-5A,-8A,-9A,-12A	0	1	0	0	0	0	0	0	0
SNV:-11A,-13A,-14T	0	1	0	0	0	0	0	0	0
SNV:3G,-12A	0	1	0	0	0	0	0	0	0
SNV:6A,-9G	0	0	1	0	0	0	0	0	0
SNV:6T,5T,-15T	0	0	1	0	0	0	0	0	0
SNV:-9A,-12A,-14T	0	0	1	0	0	0	0	0	0
SNV:2A,-7G	0	0	1	0	0	0	0	0	0
SNV:-2T,-4C,-8A	0	0	1	0	0	0	0	0	0
SNV:-9T,-15T	0	0	1	0	0	0	0	0	0
SNV:-12T,-13C	0	0	1	0	0	0	0	0	0
SNV:2A,-5A,-8A,-12A	0	0	1	0	0	0	0	0	0
SNV:6T,-14T	0	0	1	0	0	0	0	0	0
SNV:-5A,-6T	0	0	1	0	0	0	0	0	0
SNV:-7T,-13A	0	0	1	0	0	0	0	0	0
SNV:2G,1A	0	0	1	0	0	0	0	0	0
SNV:-3A,-5G,-9A,-11A,-14T	0	0	1	0	0	0	0	0	0
SNV:-5G,-8A,-9A	0	0	1	0	0	0	0	0	0
SNV:3C,-11C	0	0	1	0	0	0	0	0	0
SNV:5T,4T,1T	0	0	1	0	0	0	0	0	0
SNV:6T,2A,-2C	0	0	1	0	0	0	0	0	0
SNV:-6T,-15A	0	0	1	0	0	0	0	0	0
SNV:4T,2A,-12A	0	0	1	0	0	0	0	0	0
SNV:5T,-5A,-14T,-15T	0	0	1	0	0	0	0	0	0
SNV:6T,5T,4T,-5A,-9A,-12A	0	0	1	0	0	0	0	0	0
SNV:-8A,-12G,-13A	0	0	1	0	0	0	0	0	0
SNV:-5G,-14T	0	0	1	0	0	0	0	0	0
SNV:6A,5A	0	0	1	0	0	0	0	0	0
SNV:-8A,-11A	0	0	1	0	0	0	0	0	0
SNV:2A,-5A,-8A,-9A,-12A	0	0	1	0	0	0	0	0	0
SNV:2A,-15T	0	0	1	0	0	0	0	0	0
SNV:6A,-4G	0	0	0	1	0	0	0	0	0
SNV:5T,4T,-2T	0	0	0	1	0	0	0	0	0
SNV:6C,5T,4T	0	0	0	1	0	0	0	0	0
SNV:6A,-8A	0	0	0	1	0	0	0	0	0
SNV:-4C,-11C	0	0	0	1	0	0	0	0	0
SNV:3C,-7G	0	0	0	1	0	0	0	0	0
SNV:5T,2A,-5A,-8A,-9A,-12A	0	0	0	1	0	0	0	0	0
SNV:2A,-5A,-9A,-12A	0	0	0	1	0	0	0	0	0
SNV:4T,1A	0	0	0	1	0	0	0	0	0
SNV:-1A,-4C,-6A,-10C	0	0	0	1	0	0	0	0	0
SNV:-5G,-9G,-11A,-13A,-14C	0	0	0	1	0	0	0	0	0
SNV:3C,-15T	0	0	0	1	0	0	0	0	0
SNV:1T,-1C	0	0	0	1	0	0	0	0	0
SNV:6T,-3A,-5G,-8A,-11A,-12G,-13A	0	0	0	1	0	0	0	0	0
SNV:-7T,-9A	0	0	0	1	0	0	0	0	0
SNV:3C,-9G	0	0	0	1	0	0	0	0	0
SNV:-5G,-11C	0	0	0	1	0	0	0	0	0
SNV:3C,-14A	0	0	0	0	1	0	0	0	0
SNV:3C,-6T	0	0	0	0	1	0	0	0	0
SNV:-6C,-12A	0	0	0	0	1	0	0	0	0
SNV:5A,-1A	0	0	0	0	1	0	0	0	0
SNV:-1G,-14T	0	0	0	0	1	0	0	0	0
SNV:4T,-13T	0	0	0	0	1	0	0	0	0
SNV:5T,2T	0	0	0	0	1	0	0	0	0
SNV:4T,3C	0	0	0	0	1	0	0	0	0
SNV:6T,3C	0	0	0	0	1	0	0	0	0
SNV:5T,-9A	0	0	0	0	1	0	0	0	0
SNV:-8A,-13A,-14C	0	0	0	0	1	0	0	0	0
SNV:3G,2T	0	0	0	0	1	0	0	0	0
SNV:6T,-8A	0	0	0	0	1	0	0	0	0
SNV:-3A,-7G	0	0	0	0	1	0	0	0	0
SNV:-14A,-15A	0	0	0	0	1	0	0	0	0
SNV:-2C,-3A	0	0	0	0	1	0	0	0	0
SNV:1A,-1C	0	0	0	0	1	0	0	0	0
SNV:-2C,-8A	0	0	0	0	1	0	0	0	0
SNV:5A,-8A	0	0	0	0	1	0	0	0	0
SNV:-6A,-7T	0	0	0	0	1	0	0	0	0
SNV:-2G,-10G	0	0	0	0	1	0	0	0	0
SNV:-5A,-8A,-9G,-12G	0	0	0	0	0	1	0	0	0
SNV:-5G,-8A,-12G,-14T	0	0	0	0	0	1	0	0	0
SNV:6T,5T,2A,-5A,-9A,-12A	0	0	0	0	0	1	0	0	0
SNV:5T,-13T	0	0	0	0	0	1	0	0	0
SNV:-2G,-9A	0	0	0	0	0	1	0	0	0
SNV:-3A,-14T	0	0	0	0	0	1	0	0	0
SNV:4T,-8A	0	0	0	0	0	1	0	0	0
SNV:-12A,-14A	0	0	0	0	0	1	0	0	0
SNV:-5A,-13T	0	0	0	0	0	1	0	0	0
SNV:-3A,-5A,-13T	0	0	0	0	0	1	0	0	0
SNV:6A,2A	0	0	0	0	0	1	0	0	0
SNV:-4G,-10G,-14A	0	0	0	0	0	1	0	0	0
SNV:6T,5T,4T,2A,-12A	0	0	0	0	0	1	0	0	0
SNV:-4C,-9A	0	0	0	0	0	1	0	0	0
SNV:6T,4T,-6T,-12A	0	0	0	0	0	1	0	0	0
SNV:-4G,-11G	0	0	0	0	0	1	0	0	0
SNV:-6T,-12A	0	0	0	0	0	1	0	0	0
SNV:-8A,-14C	0	0	0	0	0	1	0	0	0
SNV:6T,2A,-5A,-13T	0	0	0	0	0	1	0	0	0
SNV:6T,2A	0	0	0	0	0	1	0	0	0
SNV:3C,-3A	0	0	0	0	0	1	0	0	0
SNV:2A,-15A	0	0	0	0	0	1	0	0	0
SNV:-4G,-8A,-9A,-12A,-13C,-15A	0	0	0	0	0	1	0	0	0
SNV:-1A,-12G,-13A,-14C	0	0	0	0	0	1	0	0	0
SNV:6T,-9A,-11A,-12A	0	0	0	0	0	1	0	0	0
SNV:-9A,-11C	0	0	0	0	0	1	0	0	0
SNV:-1A,-9A,-15T	0	0	0	0	0	1	0	0	0
SNV:-14C,-15T	0	0	0	0	0	1	0	0	0
SNV:-5A,-9A	0	0	0	0	0	1	0	0	0
SNV:-3A,-8A,-9A	0	0	0	0	0	1	0	0	0
SNV:6C,5A	0	0	0	0	0	1	0	0	0
SNV:3G,1T	0	0	0	0	0	1	0	0	0
SNV:-11A,-14T	0	0	0	0	0	1	0	0	0
SNV:2A,-3A,-9A	0	0	0	0	0	1	0	0	0
SNV:6T,-15T	0	0	0	0	0	1	0	0	0
SNV:5T,4T,2A,-5A,-12A	0	0	0	0	0	1	0	0	0
SNV:5A,4A,1A,-1A,-3T,-5T	0	0	0	0	0	1	0	0	0
SNV:6T,-6T	0	0	0	0	0	1	0	0	0
SNV:5T,-2C	0	0	0	0	0	1	0	0	0
SNV:6T,-14A	0	0	0	0	0	1	0	0	0
SNV:2A,-7T	0	0	0	0	0	1	0	0	0
SNV:6T,5T,4T,-6T,-9A,-12A	0	0	0	0	0	1	0	0	0
SNV:-3A,-6A	0	0	0	0	0	1	0	0	0
SNV:-5A,-15T	0	0	0	0	0	0	1	0	0
SNV:-5G,-8A,-13A,-14T	0	0	0	0	0	0	1	0	0
SNV:5A,-12A,-14T	0	0	0	0	0	0	1	0	0
SNV:-9A,-11A,-14T	0	0	0	0	0	0	1	0	0
SNV:2A,-3A,-5A,-12A	0	0	0	0	0	0	1	0	0
SNV:6A,-3A	0	0	0	0	0	0	1	0	0
SNV:-3A,-5A,-9A	0	0	0	0	0	0	1	0	0
SNV:4C,-9A	0	0	0	0	0	0	1	0	0
SNV:6C,-15T	0	0	0	0	0	0	0	1	0
SNV:5T,-2T	0	0	0	0	0	0	0	1	0
SNV:-8T,-9T	0	0	0	0	0	0	0	1	0
SNV:-11A,-13A	0	0	0	0	0	0	0	1	0
SNV:-2T,-10C	0	0	0	0	0	0	0	1	0
SNV:-8A,-12G	0	0	0	0	0	0	0	1	0
SNV:-4C,-12G	0	0	0	0	0	0	0	1	0
SNV:1T,-10G	0	0	0	0	0	0	0	1	0
SNV:-1C,-13C	0	0	0	0	0	0	0	1	0
SNV:5A,-8A,-12A,-14T	0	0	0	0	0	0	0	1	0
SNV:-5G,-9A,-14T	0	0	0	0	0	0	0	1	0
SNV:5A,-9A	0	0	0	0	0	0	0	1	0
SNV:4T,-12A	0	0	0	0	0	0	0	1	0
SNV:5T,-8A	0	0	0	0	0	0	0	1	0
SNV:-5G,-8A,-12G,-13A,-14T	0	0	0	0	0	0	0	1	0
SNV:3G,-10G	0	0	0	0	0	0	0	1	0
SNV:4T,-6T,-15T	0	0	0	0	0	0	0	1	0
SNV:6C,1C	0	0	0	0	0	0	0	1	0
SNV:-5A,-8A,-9A	0	0	0	0	0	0	0	0	1
SNV:-6C,-11C	0	0	0	0	0	0	0	0	1
SNV:-8A,-13A	0	0	0	0	0	0	0	0	1
SNV:6T,5T,4T,-6T,-14T,-15T	0	0	0	0	0	0	0	0	1
SNV:6T,4T	0	0	0	0	0	0	0	0	1
SNV:-1C,-14T	0	0	0	0	0	0	0	0	1
SNV:6T,-4C,-12G	0	0	0	0	0	0	0	0	1
SNV:-8A,-12T,-13A	0	0	0	0	0	0	0	0	1
SNV:2G,-9A	0	0	0	0	0	0	0	0	1
SNV:-2C,-14A	0	0	0	0	0	0	0	0	1
SNV:-11G,-12T,-13T	0	0	0	0	0	0	0	0	1
SNV:-4C,-6C,-10C,-11C	0	0	0	0	0	0	0	0	1
SNV:4T,2A,-5A	0	0	0	0	0	0	0	0	1
SNV:-3A,-10G	0	0	0	0	0	0	0	0	1
SNV:6T,5T,2T,-9G	0	0	0	0	0	0	0	0	1
SNV:2A,-13T	0	0	0	0	0	0	0	0	1
SNV:6T,2A,-6T,-12A	0	0	0	0	0	0	0	0	1
SNV:-8A,-9A,-12A,-13A,-14T	0	0	0	0	0	0	0	0	1
SNV:-5A,-12A,-13T	0	0	0	0	0	0	0	0	1
SNV:-12A,-13A,-15A	0	0	0	0	0	0	0	0	1
SNV:-5A,-15A	0	0	0	0	0	0	0	0	1
SNV:-2G,-14C	0	0	0	0	0	0	0	0	1
SNV:-10T,-15T	0	0	0	0	0	0	0	0	1
SNV:-4C,-12A	0	0	0	0	0	0	0	0	1
SNV:4T,-6T,-13T	0	0	0	0	0	0	0	0	1
SNV:1T,-4C	0	0	0	0	0	0	0	0	1
SNV:6T,5T,4T,-6T,-12A,-15T	0	0	0	0	0	0	0	0	1
SNV:-5A,-12A,-14T	0	0	0	0	0	0	0	0	1
SNV:-12A,-13T	0	0	0	0	0	0	0	0	1
SNV:-3A,-8A,-12G	0	0	0	0	0	0	0	0	1
SNV:6T,4T,1T,-6T,-12A	0	0	0	0	0	0	0	0	1
SNV:2A,-14T	0	0	0	0	0	0	0	0	1
SNV:-3A,-8A,-9A,-12A	0	0	0	0	0	0	0	0	1
SNV:5A,-14A	0	0	0	0	0	0	0	0	1
SNV:6T,5T,4T,-13T	0	0	0	0	0	0	0	0	1
SNV:5T,-13T,-14T	0	0	0	0	0	0	0	0	1
SNV:6T,-13A	0	0	0	0	0	0	0	0	1
SNV:4T,-15A	0	0	0	0	0	0	0	0	1
SNV:-3A,-5T,-10T	0	0	0	0	0	0	0	0	1
SNV:-2C,-10G	0	0	0	0	0	0	0	0	1
SNV:5T,4T,-8A,-12A,-13T	0	0	0	0	0	0	0	0	1
SNV:-6A,-10G	0	0	0	0	0	0	0	0	1
SNV:5T,-5T,-14T	0	0	0	0	0	0	0	0	1
SNV:-5A,-12A,-15T	0	0	0	0	0	0	0	0	1
SNV:3G,-1G,-2C	0	0	0	0	0	0	0	0	1
SNV:5T,4T,-3A,-5A,-8A,-12A	0	0	0	0	0	0	0	0	1
SNV:5A,-3A,-8A,-14T	0	0	0	0	0	0	0	0	1
SNV:-4G,-13T	0	0	0	0	0	0	0	0	1
SNV:6T,-11C	0	0	0	0	0	0	0	0	1
SNV:6T,2A,1T,-3A,-5A,-12A,-14T	0	0	0	0	0	0	0	0	1
SNV:5T,2A,-5A,-12A	0	0	0	0	0	0	0	0	1
SNV:5T,-12A	0	0	0	0	0	0	0	0	1
SNV:3G,-4C,-11A	0	0	0	0	0	0	0	0	1
SNV:-9G,-10G	0	0	0	0	0	0	0	0	1
SNV:-7G,-15A	0	0	0	0	0	0	0	0	1
SNV:4A,1T	0	0	0	0	0	0	0	0	1
SNV:2T,-14A	0	0	0	0	0	0	0	0	1
-13:1D	17	17	28	14	16	39	8	8	44
6:1D	14	11	10	11	10	16	4	5	22
1:1I	0	0	0	0	2	19	0	2	52
-8:1D	1	1	4	2	4	4	1	2	4
4:12D	0	11	0	0	0	0	0	0	0
-3:6D	0	10	0	0	0	0	0	0	0
5:2D	0	0	0	1	1	1	0	0	2
1:15I	0	0	0	0	5	0	0	0	0
2:41I	0	0	0	0	5	0	0	0	0
-10:2D	0	0	0	0	1	2	0	0	2
-12:18D	0	4	0	0	0	0	0	0	0
-12:1D	1	0	0	0	0	0	0	1	1
2:3D	1	0	0	0	1	0	0	0	1
-10:45D	1	0	1	0	0	0	0	0	0
-10:1D	0	0	1	0	0	0	0	0	1
-14:2D	0	0	1	1	0	0	0	0	0
-11:1D	0	0	0	1	0	0	0	0	1
-7:2D	0	0	0	0	0	1	0	0	1
-1:2D	0	1	0	0	0	0	0	0	0
2:2D	0	1	0	0	0	0	0	0	0
3:3D	0	0	1	0	0	0	0	0	0
-2:6D	0	0	0	0	1	0	0	0	0
1:1D	0	0	0	0	0	0	1	0	0
-8:2D	0	0	0	0	0	0	1	0	0
-9:3D	0	0	0	0	0	0	0	1	0
-7:1D	0	0	0	0	0	0	0	1	0
-2:2D	0	0	0	0	0	0	0	0	1
-2:1D	0	0	0	0	0	0	0	0	1
3:2D	0	0	0	0	0	0	0	0	1
Other	0	0	1	1	1	1	0	0	0

## Sheet: Reporter_mutRFP-Off_target-2
Sample	I.NT	I.RNP...65mer.unco...SpCas9.WT.	I.RNPD...65mer.coup...SpCas9.SNAP.	II.NT	II.RNP...65mer.unco...SpCas9.WT.	II.RNPD...65mer.coup...SpCas9.SNAP.	III.NT	III.RNP...65mer.unco...SpCas9.WT.	III.RNPD...65mer.coup...SpCas9.SNAP.
no variant	1022072	90328	152167	130072	321519	116221	103547	88604	105170
SNV:-10C	297	34	71	53	112	28	30	31	47
SNV:-8A	317	28	53	42	113	32	23	36	38
SNV:-11C	295	22	54	44	108	29	30	47	35
SNV:5T	314	25	42	42	103	31	24	24	20
SNV:-4C	243	24	64	44	88	30	29	39	43
SNV:-12A	272	29	34	32	71	41	33	13	9
SNV:-15C	213	28	61	43	85	28	17	32	24
SNV:-12T	261	36	31	35	94	30	13	11	8
SNV:-3C	198	26	46	34	81	33	26	36	37
SNV:3C	224	28	47	37	82	26	21	26	21
SNV:-7G	227	17	52	26	69	28	20	28	42
SNV:-14T	250	21	34	31	73	25	24	13	36
SNV:1C	203	22	46	28	67	30	18	38	51
SNV:-6T	289	15	32	17	81	18	15	12	17
SNV:6T	264	22	39	31	71	33	11	9	16
SNV:-9A	219	28	37	31	73	26	23	24	20
SNV:-13T	232	17	24	26	65	34	16	10	16
SNV:-5A	227	15	27	30	65	16	22	10	15
SNV:2A	201	15	33	32	67	22	13	19	20
SNV:-2A	206	14	30	29	61	28	17	13	18
SNV:-1G	184	22	35	27	48	21	14	35	30
SNV:4G	175	16	42	21	57	20	26	18	25
SNV:-8T	174	13	33	32	63	20	19	7	18
SNV:-14A	165	17	27	24	51	13	19	13	14
SNV:2G	159	16	32	27	54	29	1	9	5
SNV:6A	141	13	17	18	38	14	12	7	11
SNV:2T	133	10	28	11	38	12	3	7	12
SNV:-9T	94	9	16	15	32	11	6	9	9
SNV:-2T	89	6	16	16	17	10	11	11	14
SNV:-11A	116	6	8	7	16	13	3	2	4
SNV:-3A	79	6	15	20	21	5	8	6	14
SNV:-1T	90	10	8	11	25	7	5	9	3
SNV:5A	82	6	13	8	26	5	6	9	4
SNV:-5T	63	3	17	20	22	10	4	12	1
SNV:4T	80	6	10	6	20	6	8	3	7
SNV:-6A	73	6	9	4	28	5	3	4	6
SNV:3A	70	3	7	10	21	10	6	4	5
SNV:-13A	61	7	8	10	17	9	7	3	11
SNV:-10A	74	7	7	5	13	3	9	5	10
SNV:-15A	58	6	10	9	23	10	4	3	7
SNV:-12G	65	2	4	14	19	9	4	1	7
SNV:-3G	59	8	7	6	19	11	1	1	0
SNV:-8G	53	4	7	7	22	3	2	5	3
SNV:1A	36	5	5	4	12	4	6	3	5
SNV:-7T	27	5	6	7	19	7	4	0	4
SNV:5C	30	1	10	8	13	6	3	3	2
SNV:3G	36	2	6	7	15	5	0	1	2
SNV:-9G	26	4	3	5	13	4	5	2	4
SNV:-6C	27	3	3	4	11	5	2	1	1
SNV:-14C	27	3	3	4	4	9	1	3	3
SNV:-4A	27	2	3	5	7	4	3	1	1
SNV:-11G	33	2	5	0	6	2	1	1	3
SNV:6C	26	3	0	7	3	5	0	3	2
SNV:4C	23	2	6	2	7	3	1	1	2
SNV:-10G	28	3	3	0	2	2	0	0	3
SNV:-2G	18	2	2	2	5	2	1	4	2
SNV:-4G	22	1	3	2	3	3	1	1	2
SNV:-5G	18	1	5	2	6	2	1	1	1
SNV:-13C	20	0	2	2	5	1	1	1	0
SNV:-15G	15	4	3	2	3	0	0	0	0
SNV:-12A,-5A	10	3	2	5	0	0	0	0	0
SNV:-12T,6T	14	1	0	4	1	0	0	0	0
SNV:-1C	8	0	1	4	1	0	0	0	1
SNV:-12T,-6T	6	0	0	2	2	0	0	0	0
SNV:1G	4	1	1	1	0	0	1	1	0
SNV:-7C	2	0	1	1	1	0	0	1	2
SNV:-12T,-8T	3	0	1	2	1	0	0	0	0
SNV:-13T,5T	6	0	0	1	0	0	0	0	0
SNV:-6T,6T	5	0	0	0	1	0	0	0	0
SNV:-13T,-6T,5T	3	0	0	0	1	1	0	0	0
SNV:-12T,5T	4	0	0	0	1	0	0	0	0
SNV:-6T,5T	2	0	0	1	0	1	0	0	0
SNV:-13T,-6T	3	0	1	0	0	0	0	0	0
SNV:-12A,6T	3	0	0	0	1	0	0	0	0
SNV:-13T,5T,6T	4	0	0	0	0	0	0	0	0
SNV:-11A,-3G	4	0	0	0	0	0	0	0	0
SNV:-10C,-3C	1	0	0	1	0	1	0	0	0
SNV:-11A,-10G	2	0	0	1	0	0	0	0	0
SNV:-13T,-5A	3	0	0	0	0	0	0	0	0
SNV:-11C,-3C	1	0	0	0	1	0	0	1	0
SNV:-14T,-13T	2	0	1	0	0	0	0	0	0
SNV:-8T,6T	3	0	0	0	0	0	0	0	0
SNV:-10C,1C	0	0	1	0	0	1	0	1	0
SNV:-12T,-6T,6T	0	0	1	0	2	0	0	0	0
SNV:-6T,5T,6T	2	0	0	0	0	0	0	0	0
SNV:-13T,-6T,5T,6T	2	0	0	0	0	0	0	0	0
SNV:-12T,-4A	1	0	0	0	1	0	0	0	0
SNV:5T,6T	1	0	0	0	1	0	0	0	0
SNV:-14A,-12A,-5A	1	0	0	0	0	1	0	0	0
SNV:-12A,-8A	2	0	0	0	0	0	0	0	0
SNV:-10C,3C	1	0	0	0	1	0	0	0	0
SNV:-13T,-5A,5T	1	0	0	0	0	1	0	0	0
SNV:-14T,-6T	2	0	0	0	0	0	0	0	0
SNV:-14T,-13T,-6T,5T	1	0	1	0	0	0	0	0	0
SNV:-8T,-6T	1	0	0	1	0	0	0	0	0
SNV:-12T,-11A	1	0	1	0	0	0	0	0	0
SNV:-3G,-1C	2	0	0	0	0	0	0	0	0
SNV:-8T,-2A	2	0	0	0	0	0	0	0	0
SNV:-3G,5A	2	0	0	0	0	0	0	0	0
SNV:-10G,6T	2	0	0	0	0	0	0	0	0
SNV:-12T,-8A,2T	1	0	0	1	0	0	0	0	0
SNV:-12A,-11G	2	0	0	0	0	0	0	0	0
SNV:-14T,-13T,-6T,5T,6T	1	0	1	0	0	0	0	0	0
SNV:-12G,-2T	1	1	0	0	0	0	0	0	0
SNV:-12A,-6T	1	0	0	0	1	0	0	0	0
SNV:-5G,6T	0	1	1	0	0	0	0	0	0
SNV:-12A,-9A	0	0	1	0	1	0	0	0	0
SNV:-9T,-8T	0	0	1	0	0	1	0	0	0
SNV:-13A,-8A	0	0	0	0	1	0	0	1	0
SNV:-11A,-7T	0	0	0	0	2	0	0	0	0
SNV:-12T,-6C	0	0	0	0	2	0	0	0	0
SNV:2T,3C	0	0	0	0	0	2	0	0	0
SNV:-11A,-7T,5A	1	0	0	0	0	0	0	0	0
SNV:-10G,5A	1	0	0	0	0	0	0	0	0
SNV:-12T,3G	1	0	0	0	0	0	0	0	0
SNV:-10C,-3A	1	0	0	0	0	0	0	0	0
SNV:-12G,-2A,6T	1	0	0	0	0	0	0	0	0
SNV:-7T,2T	1	0	0	0	0	0	0	0	0
SNV:-14A,-11C	1	0	0	0	0	0	0	0	0
SNV:-5A,6T	1	0	0	0	0	0	0	0	0
SNV:-5A,2T	1	0	0	0	0	0	0	0	0
SNV:-11A,-5T,-4G	1	0	0	0	0	0	0	0	0
SNV:-5A,-4C,1A	1	0	0	0	0	0	0	0	0
SNV:-7G,-4A	1	0	0	0	0	0	0	0	0
SNV:2T,5A	1	0	0	0	0	0	0	0	0
SNV:-12T,-4G	1	0	0	0	0	0	0	0	0
SNV:-13A,-12A	1	0	0	0	0	0	0	0	0
SNV:-13C,4G	1	0	0	0	0	0	0	0	0
SNV:-13A,-12A,-11A,-9A,-7C	1	0	0	0	0	0	0	0	0
SNV:-15G,-4C	1	0	0	0	0	0	0	0	0
SNV:-10C,5T	1	0	0	0	0	0	0	0	0
SNV:-14T,-6T,5T	1	0	0	0	0	0	0	0	0
SNV:-4C,2T	1	0	0	0	0	0	0	0	0
SNV:-14T,-13T,6T	1	0	0	0	0	0	0	0	0
SNV:-1T,1C	1	0	0	0	0	0	0	0	0
SNV:-12T,-8T,-6T	1	0	0	0	0	0	0	0	0
SNV:-11A,-1C,3G	1	0	0	0	0	0	0	0	0
SNV:-3G,4T	1	0	0	0	0	0	0	0	0
SNV:-8T,-1T	1	0	0	0	0	0	0	0	0
SNV:-14T,1C	1	0	0	0	0	0	0	0	0
SNV:-13T,-12A,-11C	1	0	0	0	0	0	0	0	0
SNV:-4C,5T	1	0	0	0	0	0	0	0	0
SNV:-8T,4G	1	0	0	0	0	0	0	0	0
SNV:-7G,-6A	1	0	0	0	0	0	0	0	0
SNV:-6T,6A	1	0	0	0	0	0	0	0	0
SNV:-14T,-13T,-12A	1	0	0	0	0	0	0	0	0
SNV:-12T,-9T,-5T	1	0	0	0	0	0	0	0	0
SNV:-5A,5A	1	0	0	0	0	0	0	0	0
SNV:-3A,3G	1	0	0	0	0	0	0	0	0
SNV:-7T,-3C	1	0	0	0	0	0	0	0	0
SNV:-4C,-1G	1	0	0	0	0	0	0	0	0
SNV:-6C,5T	1	0	0	0	0	0	0	0	0
SNV:-9T,-6T	1	0	0	0	0	0	0	0	0
SNV:-12A,-7G	1	0	0	0	0	0	0	0	0
SNV:-5A,5T	1	0	0	0	0	0	0	0	0
SNV:-11A,-10G,-3G	1	0	0	0	0	0	0	0	0
SNV:-8A,-5A	1	0	0	0	0	0	0	0	0
SNV:-4A,5A	1	0	0	0	0	0	0	0	0
SNV:-10C,-1T	1	0	0	0	0	0	0	0	0
SNV:-5G,1C	1	0	0	0	0	0	0	0	0
SNV:-10C,-5T,3A	1	0	0	0	0	0	0	0	0
SNV:-9A,-8A	1	0	0	0	0	0	0	0	0
SNV:-12T,-5A	1	0	0	0	0	0	0	0	0
SNV:-6T,-5A,6A	1	0	0	0	0	0	0	0	0
SNV:-8A,5T	1	0	0	0	0	0	0	0	0
SNV:-12T,-6T,2G	1	0	0	0	0	0	0	0	0
SNV:-9A,5T	1	0	0	0	0	0	0	0	0
SNV:-11A,2G	1	0	0	0	0	0	0	0	0
SNV:-12A,2G	1	0	0	0	0	0	0	0	0
SNV:-12G,-11A	1	0	0	0	0	0	0	0	0
SNV:-11G,-8T	1	0	0	0	0	0	0	0	0
SNV:-12T,-11G	1	0	0	0	0	0	0	0	0
SNV:-2T,6T	1	0	0	0	0	0	0	0	0
SNV:-13A,5T	1	0	0	0	0	0	0	0	0
SNV:-9G,2T,3G	1	0	0	0	0	0	0	0	0
SNV:-12A,-8A,-5A	1	0	0	0	0	0	0	0	0
SNV:-15A,-7G	1	0	0	0	0	0	0	0	0
SNV:-8G,-3A	1	0	0	0	0	0	0	0	0
SNV:1C,5C	1	0	0	0	0	0	0	0	0
SNV:-2A,5A	1	0	0	0	0	0	0	0	0
SNV:-12T,-11G,-1C	1	0	0	0	0	0	0	0	0
SNV:3G,5A	1	0	0	0	0	0	0	0	0
SNV:-13T,-9A	1	0	0	0	0	0	0	0	0
SNV:-12A,-8T	1	0	0	0	0	0	0	0	0
SNV:4C,6T	1	0	0	0	0	0	0	0	0
SNV:-9A,-1T	1	0	0	0	0	0	0	0	0
SNV:-11A,-7G	1	0	0	0	0	0	0	0	0
SNV:-15A,-9T,-6T	1	0	0	0	0	0	0	0	0
SNV:-6T,-3C	1	0	0	0	0	0	0	0	0
SNV:-9A,-1G	1	0	0	0	0	0	0	0	0
SNV:-10A,-4C	1	0	0	0	0	0	0	0	0
SNV:-11A,-1C,4C	1	0	0	0	0	0	0	0	0
SNV:-12T,-8T,-5A	1	0	0	0	0	0	0	0	0
SNV:-8T,-4A	1	0	0	0	0	0	0	0	0
SNV:-13T,-6T,6A	1	0	0	0	0	0	0	0	0
SNV:-12T,-6T,-5A	1	0	0	0	0	0	0	0	0
SNV:-7G,-6A,-5T	1	0	0	0	0	0	0	0	0
SNV:-4C,-2G	1	0	0	0	0	0	0	0	0
SNV:-15G,2T	1	0	0	0	0	0	0	0	0
SNV:-12T,-10C,-9T	1	0	0	0	0	0	0	0	0
SNV:-13T,-8G,6A	1	0	0	0	0	0	0	0	0
SNV:-12T,-8A,6T	1	0	0	0	0	0	0	0	0
SNV:-7G,4G	1	0	0	0	0	0	0	0	0
SNV:-14A,-7G	1	0	0	0	0	0	0	0	0
SNV:-5T,-3G	1	0	0	0	0	0	0	0	0
SNV:2A,6A	1	0	0	0	0	0	0	0	0
SNV:-14T,-3C	1	0	0	0	0	0	0	0	0
SNV:-14T,-2A,5T,6T	1	0	0	0	0	0	0	0	0
SNV:-14T,-13T,-8A,5T,6T	1	0	0	0	0	0	0	0	0
SNV:-13T,-8A,-6A	1	0	0	0	0	0	0	0	0
SNV:-13T,-8A,6T	1	0	0	0	0	0	0	0	0
SNV:-11C,3A	1	0	0	0	0	0	0	0	0
SNV:-9A,-6T,5T,6T	1	0	0	0	0	0	0	0	0
SNV:-14A,-8T	1	0	0	0	0	0	0	0	0
SNV:-5A,1A,6T	1	0	0	0	0	0	0	0	0
SNV:-11A,5C	1	0	0	0	0	0	0	0	0
SNV:-11A,-8A	1	0	0	0	0	0	0	0	0
SNV:-13T,4T	1	0	0	0	0	0	0	0	0
SNV:-6A,-5G	1	0	0	0	0	0	0	0	0
SNV:-8A,-3C	1	0	0	0	0	0	0	0	0
SNV:-8A,2T	1	0	0	0	0	0	0	0	0
SNV:-5A,-1G	1	0	0	0	0	0	0	0	0
SNV:-12T,-8T,-2A,6T	1	0	0	0	0	0	0	0	0
SNV:-9A,-5A,1G	1	0	0	0	0	0	0	0	0
SNV:-12A,-6C	1	0	0	0	0	0	0	0	0
SNV:-8T,4T	1	0	0	0	0	0	0	0	0
SNV:-5T,-4A,6A	1	0	0	0	0	0	0	0	0
SNV:-11A,4C,5A,6T	1	0	0	0	0	0	0	0	0
SNV:-13T,-10C	1	0	0	0	0	0	0	0	0
SNV:1A,2T	1	0	0	0	0	0	0	0	0
SNV:-4C,6T	1	0	0	0	0	0	0	0	0
SNV:-2T,3C	1	0	0	0	0	0	0	0	0
SNV:-15C,4T	1	0	0	0	0	0	0	0	0
SNV:-10G,-3G	1	0	0	0	0	0	0	0	0
SNV:-12T,-8T,-6C	1	0	0	0	0	0	0	0	0
SNV:-4G,-3G	1	0	0	0	0	0	0	0	0
SNV:-12G,-4G,4T	1	0	0	0	0	0	0	0	0
SNV:-7G,5A	1	0	0	0	0	0	0	0	0
SNV:-10A,-9G	1	0	0	0	0	0	0	0	0
SNV:-6T,-5T	1	0	0	0	0	0	0	0	0
SNV:-2A,1A	1	0	0	0	0	0	0	0	0
SNV:-5A,5T,6T	1	0	0	0	0	0	0	0	0
SNV:-12A,-5T	1	0	0	0	0	0	0	0	0
SNV:-13T,-8A,-5A,-3C,-2T,2G,6A	0	1	0	0	0	0	0	0	0
SNV:-11A,5A	0	1	0	0	0	0	0	0	0
SNV:-3C,-2T	0	1	0	0	0	0	0	0	0
SNV:3A,6T	0	1	0	0	0	0	0	0	0
SNV:-3A,2A	0	1	0	0	0	0	0	0	0
SNV:-12T,-4A,6T	0	1	0	0	0	0	0	0	0
SNV:4T,6T	0	1	0	0	0	0	0	0	0
SNV:-10A,-2A	0	1	0	0	0	0	0	0	0
SNV:-6A,-5T,6A	0	1	0	0	0	0	0	0	0
SNV:-11C,-8A	0	1	0	0	0	0	0	0	0
SNV:-13A,4C	0	1	0	0	0	0	0	0	0
SNV:-7T,-1T	0	1	0	0	0	0	0	0	0
SNV:-12G,4T	0	1	0	0	0	0	0	0	0
SNV:-8A,-3G	0	1	0	0	0	0	0	0	0
SNV:-4G,3G	0	1	0	0	0	0	0	0	0
SNV:-13T,-9A,-6T	0	0	1	0	0	0	0	0	0
SNV:-14T,-8T	0	0	1	0	0	0	0	0	0
SNV:-10G,5A,6T	0	0	1	0	0	0	0	0	0
SNV:-15A,4G	0	0	1	0	0	0	0	0	0
SNV:-13T,-6T,-5A	0	0	1	0	0	0	0	0	0
SNV:-6T,-5A	0	0	1	0	0	0	0	0	0
SNV:-12T,-8T,-2A	0	0	1	0	0	0	0	0	0
SNV:-6T,2A	0	0	1	0	0	0	0	0	0
SNV:-14T,-13T,5T	0	0	1	0	0	0	0	0	0
SNV:4C,5A	0	0	1	0	0	0	0	0	0
SNV:-7T,-2T	0	0	1	0	0	0	0	0	0
SNV:-3C,3C	0	0	1	0	0	0	0	0	0
SNV:-7T,4T	0	0	1	0	0	0	0	0	0
SNV:-14T,-5T	0	0	1	0	0	0	0	0	0
SNV:3C,6T	0	0	1	0	0	0	0	0	0
SNV:-11C,-2T	0	0	1	0	0	0	0	0	0
SNV:1C,3C,6T	0	0	1	0	0	0	0	0	0
SNV:-7T,6C	0	0	1	0	0	0	0	0	0
SNV:-4A,-2G	0	0	0	1	0	0	0	0	0
SNV:-13T,-6T,6T	0	0	0	1	0	0	0	0	0
SNV:-5G,-3C	0	0	0	1	0	0	0	0	0
SNV:-13T,-12A,-6T	0	0	0	1	0	0	0	0	0
SNV:-11C,-7G	0	0	0	1	0	0	0	0	0
SNV:-8T,-6T,6T	0	0	0	1	0	0	0	0	0
SNV:-10C,-3G	0	0	0	1	0	0	0	0	0
SNV:-11G,-10C,-3C,-1T	0	0	0	1	0	0	0	0	0
SNV:-13T,6T	0	0	0	1	0	0	0	0	0
SNV:-12A,-2G	0	0	0	1	0	0	0	0	0
SNV:-14T,-13T,-6T	0	0	0	1	0	0	0	0	0
SNV:-2A,5C	0	0	0	1	0	0	0	0	0
SNV:-15G,-12T,-10G,-6C,-3C,-2A,-1T	0	0	0	1	0	0	0	0	0
SNV:-6A,-2G	0	0	0	1	0	0	0	0	0
SNV:-12G,-8T	0	0	0	1	0	0	0	0	0
SNV:-12G,-7T	0	0	0	1	0	0	0	0	0
SNV:-3G,3C	0	0	0	1	0	0	0	0	0
SNV:-1G,4G	0	0	0	1	0	0	0	0	0
SNV:-2A,6T	0	0	0	0	1	0	0	0	0
SNV:-12A,5T	0	0	0	0	1	0	0	0	0
SNV:-15C,1C	0	0	0	0	1	0	0	0	0
SNV:-7T,3G	0	0	0	0	1	0	0	0	0
SNV:5A,6T	0	0	0	0	1	0	0	0	0
SNV:-12G,5A	0	0	0	0	1	0	0	0	0
SNV:1C,4C	0	0	0	0	1	0	0	0	0
SNV:-12T,-2A	0	0	0	0	1	0	0	0	0
SNV:-9G,-8A,-6A,-5A	0	0	0	0	1	0	0	0	0
SNV:-3G,-2T	0	0	0	0	1	0	0	0	0
SNV:-12T,-10G	0	0	0	0	1	0	0	0	0
SNV:-9T,-8G	0	0	0	0	1	0	0	0	0
SNV:-12T,1C	0	0	0	0	1	0	0	0	0
SNV:-8A,-4C	0	0	0	0	1	0	0	0	0
SNV:-14T,-1G	0	0	0	0	1	0	0	0	0
SNV:-8A,3C,5T	0	0	0	0	1	0	0	0	0
SNV:-12T,-9T	0	0	0	0	1	0	0	0	0
SNV:-12T,4T	0	0	0	0	1	0	0	0	0
SNV:-11C,-6T	0	0	0	0	1	0	0	0	0
SNV:-8T,-5G	0	0	0	0	1	0	0	0	0
SNV:-12A,-11G,-10C	0	0	0	0	1	0	0	0	0
SNV:-4C,-3A	0	0	0	0	1	0	0	0	0
SNV:-7T,6T	0	0	0	0	1	0	0	0	0
SNV:3A,5T	0	0	0	0	1	0	0	0	0
SNV:-15C,-3C	0	0	0	0	1	0	0	0	0
SNV:-11A,4C	0	0	0	0	1	0	0	0	0
SNV:-9A,-2G	0	0	0	0	1	0	0	0	0
SNV:-9G,-8A	0	0	0	0	1	0	0	0	0
SNV:-12A,5A	0	0	0	0	1	0	0	0	0
SNV:-14T,-9G	0	0	0	0	1	0	0	0	0
SNV:-13T,-12G,6C	0	0	0	0	1	0	0	0	0
SNV:-14C,-13T,-12T,-9T	0	0	0	0	1	0	0	0	0
SNV:-9T,6T	0	0	0	0	1	0	0	0	0
SNV:-12T,2T,6T	0	0	0	0	0	1	0	0	0
SNV:-1C,3G	0	0	0	0	0	1	0	0	0
SNV:-5A,1A	0	0	0	0	0	1	0	0	0
SNV:-9A,-5T	0	0	0	0	0	1	0	0	0
SNV:2T,3A	0	0	0	0	0	1	0	0	0
SNV:-9A,6T	0	0	0	0	0	1	0	0	0
SNV:-12G,2T	0	0	0	0	0	1	0	0	0
SNV:-8G,3G	0	0	0	0	0	1	0	0	0
SNV:-12A,-3A	0	0	0	0	0	1	0	0	0
SNV:-13A,-11A,-10A	0	0	0	0	0	1	0	0	0
SNV:-11A,-6C	0	0	0	0	0	1	0	0	0
SNV:-14T,-13T,5T,6T	0	0	0	0	0	1	0	0	0
SNV:-13T,-2T	0	0	0	0	0	1	0	0	0
SNV:-13T,1C	0	0	0	0	0	0	1	0	0
SNV:-11A,-5T	0	0	0	0	0	0	1	0	0
SNV:-3C,1G,3G	0	0	0	0	0	0	1	0	0
SNV:-8A,-5T	0	0	0	0	0	0	1	0	0
SNV:-9A,-8A,-5A	0	0	0	0	0	0	1	0	0
SNV:-8G,-4A	0	0	0	0	0	0	0	1	0
SNV:-7T,-6T,1G	0	0	0	0	0	0	0	1	0
SNV:-13C,-2T	0	0	0	0	0	0	0	1	0
SNV:-4C,6C	0	0	0	0	0	0	0	0	1
SNV:-14A,-8A	0	0	0	0	0	0	0	0	1
SNV:-14T,-6A	0	0	0	0	0	0	0	0	1
4:1D	73	5	18	12	26	7	6	9	18
-9:1D	57	5	8	9	18	5	10	5	10
5:1D	16	0	3	4	6	4	2	5	1
1:2D	20	0	5	1	7	1	3	2	2
-11:1D	20	0	2	1	8	4	1	1	2
-14:1D	11	0	2	0	2	0	2	0	2
-4:1D	5	2	4	0	3	0	1	1	3
-2:1D	6	0	1	0	3	0	0	4	1
3:1D	3	0	0	0	4	0	1	0	1
-15:1D	4	0	0	0	1	0	0	1	1
-9:2D	2	1	1	0	1	0	0	0	0
-12:1D	2	0	1	0	1	1	0	0	0
-1:2D	1	0	0	1	1	0	0	0	1
1:1D	2	1	0	0	0	0	0	0	0
-3:3D	1	0	0	0	0	1	0	0	0
4:2D	1	0	1	0	0	0	0	0	0
-7:2D	1	0	0	0	0	0	0	0	0
-13:2D	0	1	0	0	0	0	0	0	0
-5:3D	0	0	1	0	0	0	0	0	0
-7:1D	0	0	0	0	0	1	0	0	0
3:2D	0	0	0	0	0	0	1	0	0
-9:3D	0	0	0	0	0	0	0	1	0

## Sheet: Reporter_mutRFP-Off_target-3
Sample	I.NT	I.RNP...65mer.unco...SpCas9.WT.	I.RNPD...65mer.coup...SpCas9.SNAP.	II.NT	II.RNP...65mer.unco...SpCas9.WT.	II.RNPD...65mer.coup...SpCas9.SNAP.	III.NT	III.RNP...65mer.unco...SpCas9.WT.	III.RNPD...65mer.coup...SpCas9.SNAP.
no variant	184363	90314	269080	94683	85854	124693	97428	117148	96460
SNV:-9A	69	38	84	37	32	33	25	33	30
SNV:4T	70	32	83	22	27	35	20	32	26
SNV:-10A	52	23	59	33	21	25	35	32	26
SNV:-13A	55	28	58	26	28	25	25	23	21
SNV:5T	48	18	78	22	20	33	24	24	19
SNV:-11A	43	24	69	30	17	30	23	25	19
SNV:3C	30	25	46	22	19	25	13	22	20
SNV:-3A	33	17	58	17	20	22	16	19	19
SNV:6T	33	19	50	16	21	22	14	20	18
SNV:1T	27	13	47	17	21	20	13	23	14
SNV:-6A	30	13	47	18	15	21	11	16	22
SNV:2A	30	20	41	15	18	21	11	17	17
SNV:-15G	26	10	49	17	15	11	17	17	18
SNV:-5C	28	9	40	14	21	19	15	12	21
SNV:-16C	31	12	31	18	13	24	19	16	9
SNV:4A	32	13	28	19	10	23	13	18	15
SNV:-8G	30	17	32	17	9	21	20	13	11
SNV:-7T	40	11	38	13	13	13	7	17	18
SNV:-14T	27	18	37	15	9	16	13	17	14
SNV:-12C	27	16	38	20	16	18	10	12	8
SNV:-1C	22	4	30	8	12	25	7	16	12
SNV:-4C	14	10	38	14	12	14	8	15	11
SNV:-2G	15	9	29	11	8	15	9	14	11
SNV:5A	21	12	27	7	12	14	6	11	9
SNV:-8T	27	11	23	6	9	9	6	8	11
SNV:-9T	21	7	25	7	9	13	6	13	9
SNV:-3T	14	8	26	11	6	13	10	14	7
SNV:-11T	15	6	15	12	5	8	12	13	7
SNV:2T	10	13	18	10	4	14	5	10	8
SNV:6A	20	3	20	5	7	7	7	12	9
SNV:-10T	16	5	20	3	8	7	10	12	7
SNV:1A	8	7	21	4	8	10	6	10	7
SNV:-16A	13	14	17	2	5	15	4	6	4
SNV:-5G	8	10	21	6	2	9	4	14	3
SNV:-13T	8	7	17	13	4	10	3	5	3
SNV:-14A	6	4	20	10	4	7	5	8	5
SNV:-6T	13	7	13	6	1	12	7	3	6
SNV:3A	10	3	12	5	4	9	4	8	10
SNV:-4G	7	3	11	8	2	7	4	8	7
SNV:-1A	8	10	11	5	2	6	5	2	5
SNV:-16G	5	7	12	4	1	9	6	4	2
SNV:-4A	2	1	15	2	4	5	4	5	5
SNV:-7A	7	5	6	2	4	5	3	5	2
SNV:4C	4	2	10	6	3	3	2	5	2
SNV:6C	7	4	7	4	1	4	1	3	2
SNV:-2T	8	3	4	1	2	1	5	4	4
SNV:1C	7	1	4	1	4	3	3	5	2
SNV:-9G	4	2	6	2	4	0	1	4	7
SNV:5C	5	1	6	4	1	3	6	2	2
SNV:-6G	6	2	6	1	2	3	2	3	4
SNV:-10G	4	3	10	0	1	1	3	4	1
SNV:-15T	7	1	4	2	3	2	3	1	2
SNV:-11G	3	1	9	1	0	5	1	1	3
SNV:-12A	2	3	4	0	2	5	2	2	2
SNV:-13G	2	1	7	2	1	3	1	2	2
SNV:-5A	3	1	5	3	2	0	3	2	1
SNV:-1G	6	4	4	3	0	0	0	1	1
SNV:-8C	1	2	5	3	1	1	1	1	4
SNV:-3G	3	1	3	1	1	2	2	1	4
SNV:-14C	3	2	5	0	1	0	2	0	2
SNV:-7C	1	2	3	1	2	0	4	1	0
SNV:2G	1	1	7	1	1	0	2	0	0
SNV:3G	3	1	1	0	0	2	1	1	0
SNV:-15C	1	0	4	2	0	0	0	0	0
SNV:-2C	1	1	1	0	1	2	0	0	0
SNV:-16G,-13A	0	0	2	0	1	0	0	1	0
SNV:-12G	0	0	2	0	0	1	0	0	1
SNV:-8T,-6T	1	0	0	0	0	0	1	0	1
SNV:-13A,-5G	0	0	1	0	0	0	1	1	0
SNV:-13A,-1A	0	0	0	0	0	0	1	2	0
SNV:-15G,4A	1	0	1	0	0	0	0	0	0
SNV:1T,2A	1	0	1	0	0	0	0	0	0
SNV:-10T,5T	0	0	1	0	0	0	1	0	0
SNV:-8G,4A	0	0	2	0	0	0	0	0	0
SNV:-13A,2A	0	0	0	0	1	1	0	0	0
SNV:-16G,-1A	0	0	0	0	0	1	0	1	0
SNV:2A,6T	0	0	0	0	0	0	0	0	2
SNV:-11T,-7T,4T	1	0	0	0	0	0	0	0	0
SNV:-16A,-4G	1	0	0	0	0	0	0	0	0
SNV:-4G,-3T	1	0	0	0	0	0	0	0	0
SNV:-8T,4T	1	0	0	0	0	0	0	0	0
SNV:-11T,5T	1	0	0	0	0	0	0	0	0
SNV:4A,5T,6C	1	0	0	0	0	0	0	0	0
SNV:-9T,1A	1	0	0	0	0	0	0	0	0
SNV:-15C,-13A,4T	1	0	0	0	0	0	0	0	0
SNV:-13A,4T	1	0	0	0	0	0	0	0	0
SNV:-7T,5T	1	0	0	0	0	0	0	0	0
SNV:-3T,6T	1	0	0	0	0	0	0	0	0
SNV:-14T,-11A,-1A	1	0	0	0	0	0	0	0	0
SNV:1C,3C	0	1	0	0	0	0	0	0	0
SNV:-15C,-7T,4C	0	1	0	0	0	0	0	0	0
SNV:-1G,6T	0	1	0	0	0	0	0	0	0
SNV:-11T,-6T	0	1	0	0	0	0	0	0	0
SNV:-6A,-1C	0	1	0	0	0	0	0	0	0
SNV:-10A,-4C,3C,5C	0	0	1	0	0	0	0	0	0
SNV:-10T,-7C,4T,5T	0	0	1	0	0	0	0	0	0
SNV:-15C,-7C,4C,5T	0	0	1	0	0	0	0	0	0
SNV:-16C,-3A	0	0	1	0	0	0	0	0	0
SNV:-8C,-7A	0	0	1	0	0	0	0	0	0
SNV:-6T,-3A,-2C	0	0	1	0	0	0	0	0	0
SNV:-15T,-11T	0	0	1	0	0	0	0	0	0
SNV:-2T,2T,6A	0	0	1	0	0	0	0	0	0
SNV:-11T,1T,2A,4C	0	0	1	0	0	0	0	0	0
SNV:-15C,-8C,-5C,5T,6T	0	0	1	0	0	0	0	0	0
SNV:-16A,-7C,-3G	0	0	1	0	0	0	0	0	0
SNV:-15C,-10A,-8C,5A	0	0	1	0	0	0	0	0	0
SNV:-14C,-8T	0	0	1	0	0	0	0	0	0
SNV:1T,4T	0	0	1	0	0	0	0	0	0
SNV:-4G,6A	0	0	1	0	0	0	0	0	0
SNV:-16G,-5G	0	0	1	0	0	0	0	0	0
SNV:-9T,-8T	0	0	1	0	0	0	0	0	0
SNV:1T,3C,4A	0	0	1	0	0	0	0	0	0
SNV:-5C,1A	0	0	1	0	0	0	0	0	0
SNV:-16A,-15G	0	0	1	0	0	0	0	0	0
SNV:-15T,-11G,-9T,-7T,4A	0	0	1	0	0	0	0	0	0
SNV:-12C,-1G,2G	0	0	1	0	0	0	0	0	0
SNV:-11T,-9A	0	0	1	0	0	0	0	0	0
SNV:-10T,-1G,5T	0	0	1	0	0	0	0	0	0
SNV:1C,4A	0	0	1	0	0	0	0	0	0
SNV:-7A,-6T	0	0	1	0	0	0	0	0	0
SNV:-13A,-8T	0	0	1	0	0	0	0	0	0
SNV:-15G,-4G,4T,5T,6C	0	0	1	0	0	0	0	0	0
SNV:-14T,-8G	0	0	1	0	0	0	0	0	0
SNV:-1A,4T	0	0	1	0	0	0	0	0	0
SNV:-13T,-4G	0	0	1	0	0	0	0	0	0
SNV:-13A,1T	0	0	1	0	0	0	0	0	0
SNV:-13T,-9A,2A	0	0	1	0	0	0	0	0	0
SNV:-8T,3A	0	0	0	1	0	0	0	0	0
SNV:-10T,4T	0	0	0	1	0	0	0	0	0
SNV:-10A,-8G	0	0	0	1	0	0	0	0	0
SNV:-12A,-10G	0	0	0	1	0	0	0	0	0
SNV:-10A,-3T	0	0	0	1	0	0	0	0	0
SNV:-13A,-5G,-1A	0	0	0	1	0	0	0	0	0
SNV:-6A,5T,6T	0	0	0	1	0	0	0	0	0
SNV:-7A,1T	0	0	0	1	0	0	0	0	0
SNV:-14T,-5G	0	0	0	1	0	0	0	0	0
SNV:-13A,-7T	0	0	0	1	0	0	0	0	0
SNV:-16C,3A	0	0	0	1	0	0	0	0	0
SNV:-8G,4A,5A	0	0	0	1	0	0	0	0	0
SNV:-3A,5T	0	0	0	1	0	0	0	0	0
SNV:-11A,-6T	0	0	0	1	0	0	0	0	0
SNV:2T,4C,5T	0	0	0	0	1	0	0	0	0
SNV:-10A,4T	0	0	0	0	1	0	0	0	0
SNV:-10G,-8T,-5A	0	0	0	0	1	0	0	0	0
SNV:-16C,3A,5A	0	0	0	0	1	0	0	0	0
SNV:-14T,1T	0	0	0	0	1	0	0	0	0
SNV:-16C,2G	0	0	0	0	1	0	0	0	0
SNV:-13T,-5C	0	0	0	0	1	0	0	0	0
SNV:-13A,-6T	0	0	0	0	1	0	0	0	0
SNV:-13A,2A,5T	0	0	0	0	1	0	0	0	0
SNV:-3G,4C,5C	0	0	0	0	1	0	0	0	0
SNV:-15T,-11T,-8T,-6G,-3T	0	0	0	0	0	1	0	0	0
SNV:-8T,1C	0	0	0	0	0	1	0	0	0
SNV:-14T,-13G,-3T	0	0	0	0	0	1	0	0	0
SNV:-14T,-6A,6A	0	0	0	0	0	1	0	0	0
SNV:-8C,-5G,-4G,-1G,3G	0	0	0	0	0	1	0	0	0
SNV:-11A,6A	0	0	0	0	0	1	0	0	0
SNV:-16A,-3G	0	0	0	0	0	1	0	0	0
SNV:-15C,-2C	0	0	0	0	0	1	0	0	0
SNV:-15C,-10A,4T	0	0	0	0	0	1	0	0	0
SNV:-15C,4T	0	0	0	0	0	1	0	0	0
SNV:-16C,-2G	0	0	0	0	0	1	0	0	0
SNV:-14C,-12C,-1C,4C,5A,6C	0	0	0	0	0	1	0	0	0
SNV:-15T,-11G,-8T	0	0	0	0	0	1	0	0	0
SNV:-12G,6T	0	0	0	0	0	1	0	0	0
SNV:-7A,3C	0	0	0	0	0	0	1	0	0
SNV:-8G,5A	0	0	0	0	0	0	1	0	0
SNV:-10A,-8T	0	0	0	0	0	0	1	0	0
SNV:-8C,1T	0	0	0	0	0	0	1	0	0
SNV:-16C,-14A,-12C	0	0	0	0	0	0	1	0	0
SNV:-11G,-6A	0	0	0	0	0	0	1	0	0
SNV:-15G,6A	0	0	0	0	0	0	1	0	0
SNV:-13T,-3A,-1G,3G	0	0	0	0	0	0	1	0	0
SNV:-1G,2G	0	0	0	0	0	0	1	0	0
SNV:-5G,-1G	0	0	0	0	0	0	1	0	0
SNV:-13A,-10T	0	0	0	0	0	0	1	0	0
SNV:-15C,-8T,-6T	0	0	0	0	0	0	1	0	0
SNV:-13T,-12C	0	0	0	0	0	0	1	0	0
SNV:-12C,6T	0	0	0	0	0	0	1	0	0
SNV:-13T,3A,5A	0	0	0	0	0	0	0	1	0
SNV:-11T,-10T	0	0	0	0	0	0	0	1	0
SNV:-13T,-12G,-11T,-10T,5A	0	0	0	0	0	0	0	1	0
SNV:-13G,5A	0	0	0	0	0	0	0	1	0
SNV:-13T,-10T	0	0	0	0	0	0	0	1	0
SNV:-6A,4A	0	0	0	0	0	0	0	1	0
SNV:-9T,3C	0	0	0	0	0	0	0	1	0
SNV:-16C,-12G	0	0	0	0	0	0	0	1	0
SNV:-4G,3C	0	0	0	0	0	0	0	1	0
SNV:1A,5A	0	0	0	0	0	0	0	1	0
SNV:1C,5T	0	0	0	0	0	0	0	0	1
SNV:-13G,-11T	0	0	0	0	0	0	0	0	1
SNV:-16C,-12C,-1G	0	0	0	0	0	0	0	0	1
SNV:-14T,3C	0	0	0	0	0	0	0	0	1
SNV:-1A,6T	0	0	0	0	0	0	0	0	1
SNV:-6A,3G	0	0	0	0	0	0	0	0	1
SNV:-14T,-6A,1T	0	0	0	0	0	0	0	0	1
SNV:-13A,-10A	0	0	0	0	0	0	0	0	1
4:1D	12	7	17	3	9	10	6	7	11
-11:1D	6	5	15	4	5	7	3	4	4
-5:1D	6	2	2	1	1	0	1	0	2
-16:1D	2	1	3	1	2	0	2	1	0
-11:2D	0	2	1	1	0	0	1	2	0
-12:1D	0	0	0	0	0	0	1	2	1
-8:2D	1	0	0	0	1	0	0	0	0
2:2D	0	0	1	0	0	1	0	0	0
-17:6D	0	0	0	1	0	1	0	0	0
-3:1D	0	0	0	0	0	0	1	0	1
-9:2I,-7:2D	1	0	0	0	0	0	0	0	0
3:2D	1	0	0	0	0	0	0	0	0
-11:1I	0	1	0	0	0	0	0	0	0
-1:3D	0	0	0	0	0	1	0	0	0
-17:2D	0	0	0	0	0	0	1	0	0
-15:1D	0	0	0	0	0	0	0	1	0
2:2I	0	0	0	0	0	0	0	1	0
Other	1	0	0	0	0	0	0	0	0

## Sheet: HEK293T_HBB
Sample	I.NT	I.RNP...65mer.unco...SpCas9.WT.	I.RNPD...65mer.coup...SpCas9.SNAP.	II.NT	II.RNP...65mer.unco...SpCas9.WT.	II.RNPD...65mer.coup...SpCas9.SNAP.	III.NT	III.RNP...65mer.unco...SpCas9.WT.	III.RNPD...65mer.coup...SpCas9.SNAP.	IV.NT	IV.RNP.unco..65.mer..SpCas9.WT.	IV.RNPD.coup..65.mer..SpCas9.SNAP.
no variant	178125	125117	133553	176531	159632	140289	174677	161360	130164	157844	162447	157860
Corrected: SNV:-1C,1C	2	117	2943	5	112	4373	1	86	2482	1	46	2438
SNV:-5A	54	42	39	58	325	52	79	32	59	25	378	84
SNV:-9G	61	56	63	85	155	60	100	53	68	81	190	87
SNV:5A	37	32	55	52	81	30	46	52	31	45	97	41
SNV:3C	33	26	32	44	105	28	44	27	34	29	99	38
SNV:6T	26	18	27	22	126	30	36	14	31	19	127	35
SNV:1A	24	22	44	27	93	42	40	24	27	23	105	33
SNV:-2G	41	21	29	41	49	44	50	43	29	37	58	39
SNV:1C	20	30	51	30	36	56	32	19	69	22	24	65
SNV:6A	52	29	17	46	40	28	38	53	40	33	40	36
SNV:-15C	27	25	34	43	27	17	54	34	18	45	46	25
SNV:-1C	8	32	48	9	46	80	9	4	41	4	47	27
SNV:-9T	20	9	15	21	56	21	29	23	20	19	77	30
SNV:-13A	27	20	12	31	62	21	32	15	15	20	51	27
SNV:4T	36	33	18	22	23	26	25	16	23	32	30	38
SNV:-14C	16	16	20	18	40	11	20	33	15	22	44	40
SNV:-1T,2G,5A	0	23	65	1	31	108	0	0	28	0	10	23
SNV:-7G	23	15	16	14	41	16	43	18	14	15	41	29
SNV:2G	20	19	21	18	32	22	21	26	15	26	36	28
SNV:-1T	24	14	22	23	43	35	15	14	20	14	37	16
SNV:-12A	22	12	20	29	40	19	13	18	25	17	35	27
SNV:2C	14	17	15	32	48	16	20	12	19	16	46	18
SNV:-14A	16	24	22	22	25	21	23	20	13	24	27	36
SNV:-4T	25	23	16	19	46	15	19	20	10	19	38	21
SNV:-3T	16	17	20	21	14	16	24	24	21	25	30	34
SNV:-16C	22	17	21	19	18	13	34	18	27	12	19	34
SNV:-6T	9	13	29	12	25	24	17	22	14	30	37	19
SNV:-10T	19	6	11	19	27	25	17	17	16	23	40	12
SNV:1G	22	10	16	10	42	18	16	15	16	11	49	6
SNV:-12T	25	10	23	21	21	13	14	17	22	11	16	20
SNV:-16G	9	7	10	13	49	7	11	3	10	4	70	16
SNV:-11T	18	12	14	34	24	18	20	16	6	15	19	11
SNV:-11A	12	6	11	23	28	19	24	18	8	9	30	13
SNV:-14T	31	9	9	13	41	18	10	4	11	14	22	16
SNV:3G	16	10	14	14	19	15	22	17	10	21	25	9
SNV:-6A	12	12	9	9	18	15	13	12	19	20	30	13
SNV:-8T	14	10	7	16	21	14	17	17	13	14	19	20
SNV:-16A	16	13	14	16	25	10	12	18	14	7	14	19
SNV:-4A	12	13	7	9	19	14	19	14	6	17	37	10
SNV:-13T	20	9	10	21	13	19	10	8	10	11	8	36
SNV:-17A	17	5	9	14	18	13	12	10	14	10	22	15
SNV:5T	4	7	8	15	33	12	10	9	13	4	25	12
SNV:-1A	12	5	8	11	14	32	13	9	8	6	24	7
SNV:-10A	3	10	7	18	23	7	19	18	13	8	14	5
SNV:4A	7	11	8	14	18	8	13	16	11	10	18	8
SNV:-3A	7	5	4	11	25	6	13	10	13	19	17	10
SNV:-17T	18	15	11	9	10	12	12	9	9	9	15	9
SNV:-9G,-5A	3	0	10	4	38	5	3	3	6	4	48	12
SNV:-5T	9	11	7	7	26	6	6	3	11	8	26	13
SNV:-2C	12	6	8	5	25	7	16	6	4	9	22	10
SNV:-2T	5	12	6	15	23	9	8	4	6	11	10	12
SNV:-3G	5	3	1	1	25	7	6	5	4	5	35	13
SNV:3T	6	5	6	13	14	4	2	8	3	9	16	11
SNV:-9C	10	6	1	10	5	7	8	10	2	9	18	10
SNV:6C	8	8	7	5	10	3	11	3	10	1	22	5
SNV:-7C	5	4	4	6	12	6	11	8	3	5	20	2
SNV:-7T	5	10	8	7	10	3	7	3	6	4	13	6
SNV:-5C	5	6	4	6	8	5	4	8	1	6	9	5
SNV:5C	6	3	6	4	11	4	3	4	5	4	6	8
SNV:2T	2	3	2	11	11	4	4	4	1	4	10	8
SNV:-4C	4	1	6	4	11	3	5	3	5	3	9	2
SNV:-8A	2	4	1	8	10	4	3	4	6	2	7	3
SNV:-15G	6	1	4	3	7	5	4	5	0	2	7	5
SNV:-17T,-1T,2G,5A	0	0	14	0	11	10	0	0	13	0	0	0
SNV:-5A,1A	1	0	1	2	20	0	1	0	1	2	19	0
SNV:-15A	8	6	0	3	3	3	2	3	2	7	3	3
SNV:-13G	3	4	5	1	3	1	3	1	1	4	4	7
SNV:-1T,2G	0	2	4	0	0	30	1	0	0	0	0	0
SNV:-10G	5	1	2	4	7	2	2	1	0	2	5	3
SNV:-12G	4	0	0	5	5	3	4	2	2	4	3	1
SNV:-5A,5A	0	1	0	0	11	0	0	0	1	0	16	3
SNV:-1C,1A	0	1	4	0	4	11	0	0	4	0	3	5
SNV:-4T,-1T	2	0	2	1	3	1	1	4	1	2	6	5
SNV:-9G,1A	1	2	1	3	7	0	1	0	2	1	6	2
SNV:-16G,-9G	2	2	2	0	6	1	0	0	1	0	9	2
SNV:-11G	1	0	1	2	2	3	3	1	2	2	6	0
SNV:-6C	1	1	3	1	5	1	1	2	2	0	3	2
SNV:4G	2	2	1	1	4	2	1	0	2	1	3	2
SNV:-1A,1C	0	1	4	0	0	13	0	1	1	0	0	1
SNV:-9G,-5A,5A	0	1	0	0	13	0	0	0	0	0	7	0
SNV:-8G	2	0	0	1	3	2	1	3	2	0	6	0
SNV:2C,4T	1	1	3	1	4	1	1	2	2	0	2	2
SNV:-9G,3C	2	0	2	0	6	2	0	1	1	0	2	3
SNV:1C,3C,5C,6C	0	16	0	0	0	0	0	0	0	0	0	0
SNV:-17G	2	2	0	0	1	1	6	0	0	0	3	0
SNV:-11A,-5A	3	1	0	0	4	2	0	1	1	0	2	0
SNV:-9G,6T	0	1	0	0	6	0	0	0	0	1	6	0
SNV:-5A,-3G	0	1	0	0	8	0	0	0	0	0	2	2
SNV:-5A,6T	0	0	0	0	4	0	0	0	1	0	7	1
SNV:-2G,-1C	1	0	0	1	2	1	2	0	2	0	2	1
SNV:-3T,-2G	0	12	0	0	0	0	0	0	0	0	0	0
SNV:-9T,-5A	0	1	0	0	4	1	0	0	1	0	4	1
SNV:-1A,1G	0	0	0	0	1	3	0	0	0	0	0	8
SNV:1A,3C	1	1	1	1	1	0	0	0	2	1	2	1
SNV:-16G,1A	0	0	1	0	5	0	0	0	1	0	4	0
SNV:-17A,1A	1	1	1	1	1	0	1	1	1	0	2	0
SNV:-5A,-1C	0	0	1	0	5	0	0	0	1	0	3	0
SNV:-9G,-5A,1A	0	0	0	0	5	0	0	0	0	0	5	0
SNV:-5A,3C	0	0	0	0	5	0	0	1	1	0	3	0
SNV:-14C,-5A	1	0	0	0	1	0	0	1	0	1	4	1
SNV:-9G,5A	0	0	0	1	2	0	1	1	1	0	2	1
SNV:-16G,-5A	0	0	0	0	4	0	0	0	0	0	5	0
SNV:-3A,1G	0	1	0	2	0	1	0	2	0	2	0	0
SNV:1G,3C	0	0	0	1	3	1	0	0	0	0	2	1
SNV:1A,2C	1	0	1	1	0	0	0	0	1	0	3	0
SNV:-13A,4A	1	0	0	1	0	0	0	0	2	2	1	0
SNV:-12A,-5A	1	0	0	0	2	0	0	0	0	0	1	3
SNV:-1C,3C	0	2	1	0	1	1	0	0	0	0	2	0
SNV:-17T,-9G	0	1	0	0	1	1	0	0	1	0	2	1
SNV:-16A,-9G	0	1	0	0	0	1	2	1	0	1	1	0
SNV:-17A,-5A	0	0	0	1	4	0	0	0	0	0	2	0
SNV:-13A,-5A	0	0	0	0	3	0	0	0	0	0	4	0
SNV:-5A,1A,5A	0	0	0	0	3	0	0	0	0	0	4	0
SNV:-16A,-5A	0	0	0	0	3	0	1	0	0	0	2	1
SNV:-9G,-1C,1C	0	0	0	0	1	3	0	0	2	0	0	1
SNV:-1C,1C,5C	0	0	0	0	0	7	0	0	0	0	0	0
SNV:-1T,3C	1	0	0	0	1	0	1	0	0	0	3	0
SNV:-1T,6T	0	0	1	1	2	0	0	0	0	0	2	0
SNV:-14T,-4T	0	0	1	1	1	1	0	1	0	1	0	0
SNV:-2C,-1T	0	0	1	1	1	0	0	1	0	0	2	0
SNV:-14T,-6T	0	0	0	1	1	1	0	0	1	1	0	1
SNV:-3A,1G,2C	0	0	0	1	2	0	0	1	0	1	0	1
SNV:-16G,5A	0	0	0	0	2	0	0	0	0	0	3	1
SNV:-2T,3C	0	0	0	0	2	0	0	1	1	0	2	0
SNV:-3G,1A	0	0	0	0	4	0	0	0	0	0	2	0
SNV:-9G,-5A,6T	0	0	0	0	3	0	0	0	0	0	3	0
SNV:1G,2C	0	0	0	0	2	1	0	0	1	1	1	0
SNV:1A,5A	0	0	0	0	3	1	0	0	0	0	2	0
SNV:-17A,-11A	1	0	0	1	2	0	0	0	1	0	0	0
SNV:-9C,-6T	1	0	0	0	2	1	0	1	0	0	0	0
SNV:-9C,-5A	0	1	1	1	0	0	0	1	0	1	0	0
SNV:-1C,1G	0	1	1	0	0	0	0	0	2	0	1	0
SNV:-5C,-2C	0	1	2	1	0	1	0	0	0	0	0	0
SNV:-16G,-3A,1G	0	1	2	1	0	0	0	0	0	0	1	0
SNV:-14T,2C	0	1	0	0	0	1	0	0	1	0	1	1
SNV:-1C,1C,5A	0	0	1	0	0	2	0	0	2	0	0	0
SNV:2G,5A	0	0	1	1	0	1	0	0	0	0	2	0
SNV:-5A,-1T	0	0	1	0	2	0	0	0	0	0	1	1
SNV:1A,2G	0	0	1	1	1	0	1	0	0	1	0	0
SNV:5T,6T	0	0	1	0	1	0	0	1	0	1	1	0
SNV:3C,6T	0	0	1	2	0	0	0	0	0	0	1	1
SNV:-14C,-9T	0	0	0	1	0	0	0	0	0	0	4	0
SNV:-9G,-3G	0	0	0	1	1	0	0	1	0	0	2	0
SNV:-16G,-12A	0	0	0	2	1	0	1	0	1	0	0	0
SNV:-9T,1A	0	0	0	1	3	0	0	0	0	0	1	0
SNV:-16G,-11A	0	0	0	0	4	0	0	0	1	0	0	0
SNV:-1C,6T	0	0	0	0	2	0	0	0	0	0	3	0
SNV:-14C,-13A	0	0	0	0	1	0	1	0	0	0	2	1
SNV:-16G,6T	0	0	0	0	3	0	0	0	0	0	2	0
SNV:-4A,-1C,1C	0	0	0	0	0	1	0	0	3	0	0	1
SNV:-4T,-2C	0	0	0	0	0	0	1	0	0	0	3	1
SNV:-14C,-9C	1	0	0	1	0	0	1	0	0	0	1	0
SNV:-16G,3C	1	0	0	0	2	0	0	0	0	0	1	0
SNV:-12A,-9T	1	0	0	0	1	0	0	0	1	0	0	1
SNV:-1A,3C	1	0	0	1	1	0	0	0	0	0	1	0
SNV:-13A,-4T	1	0	1	0	1	0	0	0	0	0	1	0
SNV:-16G,-3A	1	0	0	0	1	0	0	1	0	1	0	0
SNV:-2T,-1T	0	1	1	0	1	1	0	0	0	0	0	0
SNV:-13A,-3A	0	1	0	1	0	0	2	0	0	0	0	0
SNV:-17T,-11A	0	1	1	0	1	0	0	0	0	1	0	0
SNV:-1C,1C,6T	0	1	0	0	0	0	0	0	2	0	1	0
SNV:-13A,1A	0	0	1	0	1	0	1	0	1	0	0	0
SNV:-14T,-9C,-7C	0	0	1	0	1	0	0	1	1	0	0	0
SNV:-2G,-1C,1C	0	0	2	0	0	0	0	0	2	0	0	0
SNV:-5A,-1C,1C	0	0	1	0	0	2	0	0	0	0	0	1
SNV:-7G,-1C,1C	0	0	1	0	0	1	0	0	0	0	0	2
SNV:-1C,1C,3C	0	0	2	0	0	1	0	0	1	0	0	0
SNV:-17A,-12A	0	0	0	1	1	1	0	0	0	0	1	0
SNV:-10T,-9G,-5A	0	0	0	1	1	0	0	0	0	0	2	0
SNV:-13A,-12A	0	0	0	1	0	0	0	0	1	1	1	0
SNV:-17T,-5A	0	0	0	1	0	0	0	0	0	1	1	1
SNV:-10T,-5A	0	0	0	1	2	0	0	0	0	0	1	0
SNV:-16A,-9G,-5A	0	0	0	0	2	0	0	0	0	0	2	0
SNV:-5T,-4T	0	0	0	0	2	0	1	0	0	0	1	0
SNV:-16G,-5A,1A	0	0	0	0	1	0	0	0	0	0	3	0
SNV:-17A,3C	0	0	0	0	2	0	0	0	0	0	2	0
SNV:-11A,1A	0	0	0	0	1	0	1	0	1	1	0	0
SNV:-1C,1A,2C	0	0	0	0	4	0	0	0	0	0	0	0
SNV:-9G,-5A,1A,5A	0	0	0	0	2	0	1	0	1	0	0	0
SNV:-6T,-1T	0	0	0	0	2	1	0	0	0	0	1	0
SNV:-7G,-5A	0	0	0	0	3	0	0	0	0	0	1	0
SNV:-5A,6C	0	0	0	0	2	0	0	0	0	0	2	0
SNV:-7C,-2G	0	0	0	0	2	1	0	0	0	0	1	0
SNV:-14T,3C	0	0	0	0	1	0	2	0	0	0	0	1
SNV:-13A,-9T	0	0	0	0	1	0	1	0	0	0	2	0
SNV:-4C,-1C,1C	0	0	0	0	0	4	0	0	0	0	0	0
SNV:-16A,-13A	0	0	0	0	0	0	2	0	1	0	0	1
SNV:-9C,-6A	2	0	0	1	0	0	0	0	0	0	0	0
SNV:-9C,-8A	1	1	0	0	1	0	0	0	0	0	0	0
SNV:-9G,-7G	1	0	0	0	0	0	0	0	0	0	2	0
SNV:-17A,-16G	1	0	0	0	0	0	0	1	0	0	1	0
SNV:-17A,-5T	1	1	0	0	0	1	0	0	0	0	0	0
SNV:-17A,-9G,1A	1	0	0	1	1	0	0	0	0	0	0	0
SNV:-5T,-1T	1	0	1	0	0	1	0	0	0	0	0	0
SNV:-13A,-10T	1	0	0	0	1	0	0	0	0	0	1	0
SNV:-5T,-4T,-2C,-1T	0	1	0	0	0	0	0	1	0	0	1	0
SNV:-14T,-4T,-1T	0	2	0	0	0	0	1	0	0	0	0	0
SNV:-9G,-3G,1A	0	1	0	0	1	0	1	0	0	0	0	0
SNV:1A,4T	0	1	0	0	1	1	0	0	0	0	0	0
SNV:1A,2C,4T	0	1	0	0	0	0	0	0	1	0	0	1
SNV:-12T,-5A	0	1	0	0	0	0	0	0	0	0	1	1
SNV:-2T,-1C,1C	0	0	1	0	0	0	0	0	1	0	0	1
SNV:-3T,-1C,1C	0	0	2	0	0	1	0	0	0	0	0	0
SNV:-14C,-1T	0	0	1	0	1	0	0	0	0	0	1	0
SNV:-2C,3C	0	0	1	1	0	0	1	0	0	0	0	0
SNV:-17A,-9G	0	0	1	0	1	0	0	0	0	0	1	0
SNV:-13A,2T	0	0	1	0	0	0	0	1	0	0	1	0
SNV:-3A,2C	0	0	1	0	0	0	0	1	0	0	0	1
SNV:-17T,-1C,1C	0	0	3	0	0	0	0	0	0	0	0	0
SNV:-1A,1A	0	0	3	0	0	0	0	0	0	0	0	0
SNV:-14T,-1C,1C	0	0	2	0	0	1	0	0	0	0	0	0
SNV:-9T,-2T	0	0	0	1	1	0	0	0	0	1	0	0
SNV:-1T,2C	0	0	0	1	1	0	0	0	0	0	1	0
SNV:-12T,-6A	0	0	0	3	0	0	0	0	0	0	0	0
SNV:-14T,-5A	0	0	0	0	2	0	0	0	1	0	0	0
SNV:-9G,-5A,-3G,1A	0	0	0	0	1	0	0	0	0	0	2	0
SNV:-5T,-4T,-1C	0	0	0	0	2	1	0	0	0	0	0	0
SNV:-11A,-1C	0	0	0	0	1	0	0	0	0	0	2	0
SNV:-4A,6A	0	0	0	0	2	0	0	0	1	0	0	0
SNV:-5A,5C	0	0	0	0	1	1	0	0	0	0	1	0
SNV:-16G,-9G,-5A	0	0	0	0	1	0	0	0	0	0	2	0
SNV:-9C,-5T	0	0	0	0	1	0	0	0	1	0	0	1
SNV:-15A,-6T	0	0	0	0	3	0	0	0	0	0	0	0
SNV:-10G,-9G	0	0	0	0	1	0	0	0	0	0	2	0
SNV:-9G,-5A,-3G	0	0	0	0	2	0	0	0	0	0	1	0
SNV:-14T,-5T	0	0	0	0	1	0	0	0	1	0	1	0
SNV:-16A,-13A,-9T	0	0	0	0	1	0	1	0	0	0	1	0
SNV:5A,6T	0	0	0	0	1	0	0	0	0	0	2	0
SNV:-2G,1G	0	0	0	0	1	1	0	0	0	0	1	0
SNV:-9G,-1C	0	0	0	0	1	0	0	0	0	0	2	0
SNV:-13A,-1T	0	0	0	0	1	0	1	0	0	0	1	0
SNV:-9G,-1C,1A	0	0	0	0	1	0	0	0	1	0	1	0
SNV:-16A,1A	0	0	0	0	1	1	0	0	0	0	1	0
SNV:-1A,1G,2T	0	0	0	0	0	3	0	0	0	0	0	0
SNV:-1C,1C,3G	0	0	0	0	0	3	0	0	0	0	0	0
SNV:-11T,-1C,1C	0	0	0	0	0	2	0	0	0	0	0	1
SNV:3C,5T	0	0	0	0	0	0	1	0	0	0	0	2
SNV:-11A,3C	0	0	0	0	0	0	1	0	1	0	1	0
SNV:-4T,2T	0	0	0	0	0	0	1	0	1	0	0	1
SNV:-2G,3G	0	0	0	0	0	0	1	1	0	0	1	0
SNV:-13A,-11A,3C	0	0	0	0	0	0	0	0	1	1	0	1
SNV:-14T,-1T	0	0	0	0	0	0	0	0	0	1	2	0
SNV:-3G,3C	0	0	0	0	0	0	0	0	0	0	3	0
SNV:-9G,-5A,3C	0	0	0	0	0	0	0	0	0	0	1	2
SNV:1A,6T	0	0	0	0	0	0	0	0	0	0	3	0
SNV:-4T,1A,3C	2	0	0	0	0	0	0	0	0	0	0	0
SNV:-4T,1A	1	0	0	0	0	0	0	1	0	0	0	0
SNV:-9G,-2G	1	0	0	0	0	0	0	0	0	0	1	0
SNV:-13T,6T	1	0	0	0	0	0	0	0	0	0	1	0
SNV:-5A,-3A,3C	1	0	0	0	0	0	0	1	0	0	0	0
SNV:-4T,2C	1	1	0	0	0	0	0	0	0	0	0	0
SNV:-4A,-3G	1	0	0	0	0	0	0	0	0	0	1	0
SNV:-4T,-2T,-1C,1A	1	0	0	0	0	1	0	0	0	0	0	0
SNV:-2T,-1T,1G,2C	1	0	0	0	0	0	0	0	0	0	0	1
SNV:-9G,2C	1	0	1	0	0	0	0	0	0	0	0	0
SNV:-9T,-4T	1	0	0	0	0	0	0	0	0	1	0	0
SNV:-17T,-9G,-5A	1	0	0	0	0	0	0	0	0	0	0	1
SNV:-12A,4A	1	0	0	0	1	0	0	0	0	0	0	0
SNV:-1T,6C	1	0	1	0	0	0	0	0	0	0	0	0
SNV:-12A,6T	2	0	0	0	0	0	0	0	0	0	0	0
SNV:-17T,-16G,-9G	1	0	0	0	1	0	0	0	0	0	0	0
SNV:-3G,-2G	1	0	0	0	0	1	0	0	0	0	0	0
SNV:-17T,-1T,2G	0	2	0	0	0	0	0	0	0	0	0	0
SNV:-15C,3C	0	1	0	0	0	0	0	0	0	0	1	0
SNV:1A,4A	0	1	0	0	0	0	0	0	0	0	1	0
SNV:-16A,-12A	0	1	0	0	0	0	0	0	0	0	1	0
SNV:-9C,3C	0	1	0	0	0	0	1	0	0	0	0	0
SNV:-15G,-9G	0	1	0	0	0	0	0	0	0	0	1	0
SNV:-12A,1G	0	1	0	0	0	0	1	0	0	0	0	0
SNV:-4T,-1C,3C	0	1	0	0	0	0	0	0	1	0	0	0
SNV:-3A,1A	0	1	0	0	1	0	0	0	0	0	0	0
SNV:-6T,-1C,1C	0	0	1	0	0	0	0	0	1	0	0	0
SNV:-9G,6C	0	0	1	0	0	0	0	0	0	0	1	0
SNV:-2G,-1A	0	0	1	0	0	0	0	0	0	0	1	0
SNV:-2C,-1C,1C	0	0	1	0	0	0	0	0	1	0	0	0
SNV:-14T,1G	0	0	1	0	0	0	0	1	0	0	0	0
SNV:-9G,1A,3C	0	0	1	1	0	0	0	0	0	0	0	0
SNV:-5T,-3A,1G,2C	0	0	1	0	1	0	0	0	0	0	0	0
SNV:-6T,-5A,-4A,-2C	0	0	1	0	0	0	0	0	1	0	0	0
SNV:-13A,-11A	0	0	1	0	0	0	0	0	0	0	1	0
SNV:1G,4A,5A	0	0	2	0	0	0	0	0	0	0	0	0
SNV:-16A,-1C,1C	0	0	1	0	0	0	0	0	0	0	0	1
SNV:-13T,-1C,1C	0	0	1	0	0	0	0	0	1	0	0	0
SNV:-5A,4A	0	0	1	0	0	0	0	0	1	0	0	0
SNV:-7C,-1C	0	0	1	0	0	0	0	0	0	0	1	0
SNV:-13A,-1C,1C	0	0	1	0	0	1	0	0	0	0	0	0
SNV:-12A,-7C,-2T	0	0	1	0	0	1	0	0	0	0	0	0
SNV:3C,4T	0	0	1	0	0	0	0	0	1	0	0	0
SNV:-17A,-3A,1G	0	0	0	1	0	0	0	0	1	0	0	0
SNV:1C,4T,6C	0	0	0	1	0	0	0	0	1	0	0	0
SNV:-11A,4A	0	0	0	1	1	0	0	0	0	0	0	0
SNV:-14C,-6C	0	0	0	1	0	0	0	0	1	0	0	0
SNV:-10A,-3G	0	0	0	1	0	0	0	0	0	0	1	0
SNV:-15A,-5A	0	0	0	1	0	0	0	0	0	0	1	0
SNV:-3A,2T	0	0	0	1	1	0	0	0	0	0	0	0
SNV:-9G,5C	0	0	0	1	0	0	0	0	0	0	1	0
SNV:5A,6A	0	0	0	0	2	0	0	0	0	0	0	0
SNV:-3G,6T	0	0	0	0	2	0	0	0	0	0	0	0
SNV:-9C,1G	0	0	0	0	2	0	0	0	0	0	0	0
SNV:1C,3G	0	0	0	0	1	0	1	0	0	0	0	0
SNV:-13A,1A,2G	0	0	0	0	1	0	0	0	0	0	1	0
SNV:-17A,-5A,5A	0	0	0	0	2	0	0	0	0	0	0	0
SNV:-9G,-3G,3C	0	0	0	0	1	0	0	0	0	0	1	0
SNV:-16G,-4T	0	0	0	0	1	1	0	0	0	0	0	0
SNV:-11A,-10G	0	0	0	0	1	0	0	0	0	0	1	0
SNV:-13A,-5A,1A	0	0	0	0	1	0	0	0	0	0	1	0
SNV:-5T,-4C,-1T	0	0	0	0	1	1	0	0	0	0	0	0
SNV:-6T,3C	0	0	0	0	2	0	0	0	0	0	0	0
SNV:-16A,-5A,1A	0	0	0	0	2	0	0	0	0	0	0	0
SNV:-9T,6A	0	0	0	0	2	0	0	0	0	0	0	0
SNV:-17A,-1T	0	0	0	0	1	0	0	0	1	0	0	0
SNV:-3A,-1A	0	0	0	0	2	0	0	0	0	0	0	0
SNV:-5C,5A	0	0	0	0	1	0	0	0	0	1	0	0
SNV:-12A,-4T	0	0	0	0	1	0	1	0	0	0	0	0
SNV:-16A,-3G	0	0	0	0	1	0	0	0	0	0	1	0
SNV:-17A,-11A,-5A	0	0	0	0	2	0	0	0	0	0	0	0
SNV:-5A,3C,5A	0	0	0	0	1	0	0	0	0	0	1	0
SNV:-5A,2C	0	0	0	0	1	1	0	0	0	0	0	0
SNV:3G,6C	0	0	0	0	1	0	0	0	1	0	0	0
SNV:-17A,-5A,1A	0	0	0	0	1	0	0	0	0	0	1	0
SNV:-12G,-5A	0	0	0	0	2	0	0	0	0	0	0	0
SNV:-10T,-5A,-3G,1A	0	0	0	0	2	0	0	0	0	0	0	0
SNV:-17A,-16G,-15G	0	0	0	0	1	0	0	0	0	0	1	0
SNV:1C,5A	0	0	0	0	1	0	0	0	1	0	0	0
SNV:-5T,-2G	0	0	0	0	1	0	1	0	0	0	0	0
SNV:-11A,6T	0	0	0	0	1	0	0	0	0	0	1	0
SNV:-13A,-4T,2T	0	0	0	0	1	0	1	0	0	0	0	0
SNV:-5A,-2T	0	0	0	0	1	0	0	0	0	0	1	0
SNV:-16G,-15G,-9G	0	0	0	0	2	0	0	0	0	0	0	0
SNV:-5A,-3A	0	0	0	0	1	0	0	0	0	1	0	0
SNV:-2G,6T	0	0	0	0	2	0	0	0	0	0	0	0
SNV:-13G,-7G	0	0	0	0	1	0	0	0	0	0	1	0
SNV:-6C,-5A	0	0	0	0	1	1	0	0	0	0	0	0
SNV:-5A,-1C,1A	0	0	0	0	1	0	0	0	0	0	1	0
SNV:-10G,-5A	0	0	0	0	1	0	0	0	0	0	1	0
SNV:1C,3C	0	0	0	0	1	0	0	0	0	0	1	0
SNV:-14T,2T	0	0	0	0	1	0	0	0	0	1	0	0
SNV:-14T,-6T,2C	0	0	0	0	1	0	0	0	0	0	0	1
SNV:-17A,-16G,-5A,5A	0	0	0	0	1	0	0	0	0	0	1	0
SNV:-9G,-5A,1G	0	0	0	0	1	0	0	0	0	0	1	0
SNV:-10T,-9T	0	0	0	0	2	0	0	0	0	0	0	0
SNV:-15G,3C	0	0	0	0	1	0	0	0	0	0	1	0
SNV:-11A,-5T	0	0	0	0	2	0	0	0	0	0	0	0
SNV:-17A,-3G	0	0	0	0	1	0	0	0	0	1	0	0
SNV:-5T,-1C	0	0	0	0	1	0	0	0	0	1	0	0
SNV:-3T,-2C	0	0	0	0	1	0	0	0	0	0	1	0
SNV:-13A,-3G,2T	0	0	0	0	1	0	0	0	0	1	0	0
SNV:-16G,-12A,-5A	0	0	0	0	1	0	0	0	0	0	1	0
SNV:-10T,-9G	0	0	0	0	1	0	0	0	1	0	0	0
SNV:-16A,-10T	0	0	0	0	0	1	0	1	0	0	0	0
SNV:-1C,1C,4T	0	0	0	0	0	1	0	0	1	0	0	0
SNV:-16C,-1C,1C	0	0	0	0	0	1	0	0	0	0	0	1
SNV:-1A,6T	0	0	0	0	0	1	0	0	0	0	0	1
SNV:-1T,1C	0	0	0	0	0	2	0	0	0	0	0	0
SNV:-2G,4A	0	0	0	0	0	1	0	0	0	0	0	1
SNV:-14T,-4T,-3T,-2T,-1A,2T	0	0	0	0	0	1	0	0	0	0	0	1
SNV:-5T,6C	0	0	0	0	0	1	0	0	0	0	0	1
SNV:-17A,-12T,-5A	0	0	0	0	0	1	0	0	1	0	0	0
SNV:-16A,-9G,-5A,5A	0	0	0	0	0	1	0	0	0	0	1	0
SNV:-12A,3C	0	0	0	0	0	1	0	0	0	0	1	0
SNV:1C,6T	0	0	0	0	0	0	1	0	1	0	0	0
SNV:-13A,-7C	0	0	0	0	0	0	1	1	0	0	0	0
SNV:-4A,2C	0	0	0	0	0	0	1	0	0	0	1	0
SNV:-14T,-5T,-4T,-1T	0	0	0	0	0	0	1	0	0	0	1	0
SNV:-12T,3C	0	0	0	0	0	0	1	0	0	0	0	1
SNV:-4T,-2T,-1T,1A	0	0	0	0	0	0	0	1	0	0	0	1
SNV:-5C,6T	0	0	0	0	0	0	0	1	0	0	1	0
SNV:-4A,-2G	0	0	0	0	0	0	0	1	0	0	1	0
SNV:-4C,-3A,-2G	0	0	0	0	0	0	0	1	0	0	1	0
SNV:-4T,-2T	0	0	0	0	0	0	0	1	0	0	1	0
SNV:-5T,2C	0	0	0	0	0	0	0	1	0	0	1	0
SNV:-7T,2C	0	0	0	0	0	0	0	2	0	0	0	0
SNV:-2G,3C	0	0	0	0	0	0	0	1	0	1	0	0
SNV:-3A,-1T,2C	0	0	0	0	0	0	0	0	1	1	0	0
SNV:2C,3C	0	0	0	0	0	0	0	0	1	1	0	0
SNV:-16A,-9G,-5A,-3G	0	0	0	0	0	0	0	0	1	0	1	0
SNV:-5T,6T	0	0	0	0	0	0	0	0	1	0	0	1
SNV:-4T,-2C,-1T	0	0	0	0	0	0	0	0	1	1	0	0
SNV:-1C,1C,4A	0	0	0	0	0	0	0	0	1	0	0	1
SNV:-2C,5T	0	0	0	0	0	0	0	0	1	0	1	0
SNV:-9T,-4A	0	0	0	0	0	0	0	0	1	0	1	0
SNV:3C,6A	0	0	0	0	0	0	0	0	1	0	1	0
SNV:-1T,5T	0	0	0	0	0	0	0	0	1	0	1	0
SNV:-5T,5T	0	0	0	0	0	0	0	0	1	0	0	1
SNV:-6T,-4T	0	0	0	0	0	0	0	0	0	1	0	1
SNV:1A,5A,6T	0	0	0	0	0	0	0	0	0	0	2	0
SNV:2G,5C	0	0	0	0	0	0	0	0	0	0	2	0
SNV:-16G,-9T	0	0	0	0	0	0	0	0	0	0	2	0
SNV:-16G,-5A,5A	0	0	0	0	0	0	0	0	0	0	2	0
SNV:-14C,-7C	0	0	0	0	0	0	0	0	0	0	1	1
SNV:-13A,-4T,-2C,-1T	0	0	0	0	0	0	0	0	0	0	0	2
SNV:-11T,-6A	1	0	0	0	0	0	0	0	0	0	0	0
SNV:-16G,-15G,-5T,-4T,-2C,2G	1	0	0	0	0	0	0	0	0	0	0	0
SNV:-10T,2G	1	0	0	0	0	0	0	0	0	0	0	0
SNV:-14C,-2C	1	0	0	0	0	0	0	0	0	0	0	0
SNV:-13A,-6T	1	0	0	0	0	0	0	0	0	0	0	0
SNV:-12A,-9T,-2T	1	0	0	0	0	0	0	0	0	0	0	0
SNV:-1C,2T,3G	1	0	0	0	0	0	0	0	0	0	0	0
SNV:-17G,-14T,-11T	1	0	0	0	0	0	0	0	0	0	0	0
SNV:-17T,-16C,-11G,-9G,-7G,-5A,-1T	1	0	0	0	0	0	0	0	0	0	0	0
SNV:-13A,-9C	1	0	0	0	0	0	0	0	0	0	0	0
SNV:-4A,-1T,1A,3T	1	0	0	0	0	0	0	0	0	0	0	0
SNV:-4T,1G,3C	1	0	0	0	0	0	0	0	0	0	0	0
SNV:-17T,-16G,-12A	1	0	0	0	0	0	0	0	0	0	0	0
SNV:-16G,-13G,-9C,-2C	1	0	0	0	0	0	0	0	0	0	0	0
SNV:-14A,-4T	1	0	0	0	0	0	0	0	0	0	0	0
SNV:-13A,-4T,-3A,-2C,-1T	1	0	0	0	0	0	0	0	0	0	0	0
SNV:-17T,-10A	1	0	0	0	0	0	0	0	0	0	0	0
SNV:-14T,-13T,-10G	1	0	0	0	0	0	0	0	0	0	0	0
SNV:-14C,-2C,2T	1	0	0	0	0	0	0	0	0	0	0	0
SNV:-10T,-1T,1A	1	0	0	0	0	0	0	0	0	0	0	0
SNV:2C,5T	1	0	0	0	0	0	0	0	0	0	0	0
SNV:-5C,-4T,2T	1	0	0	0	0	0	0	0	0	0	0	0
SNV:-14A,-7C	1	0	0	0	0	0	0	0	0	0	0	0
SNV:-15G,-3A,1G	1	0	0	0	0	0	0	0	0	0	0	0
SNV:-6A,-2C	1	0	0	0	0	0	0	0	0	0	0	0
SNV:-4T,-2C,1C,3T	1	0	0	0	0	0	0	0	0	0	0	0
SNV:-16G,-12A,-10T	1	0	0	0	0	0	0	0	0	0	0	0
SNV:-14T,-13G,-12T,-11A,-4A,-3G,-2G,1G,3C	1	0	0	0	0	0	0	0	0	0	0	0
SNV:-6T,-4T,-2C,1G,2C	1	0	0	0	0	0	0	0	0	0	0	0
SNV:-13G,1G	1	0	0	0	0	0	0	0	0	0	0	0
SNV:-13A,-11A,-2G,2T,3C	1	0	0	0	0	0	0	0	0	0	0	0
SNV:-9C,-7C,-6C,2G	1	0	0	0	0	0	0	0	0	0	0	0
SNV:-6T,-4C,-2G,2C	1	0	0	0	0	0	0	0	0	0	0	0
SNV:-16G,-5C,1G	1	0	0	0	0	0	0	0	0	0	0	0
SNV:2T,5C	1	0	0	0	0	0	0	0	0	0	0	0
SNV:-16C,-13A	1	0	0	0	0	0	0	0	0	0	0	0
SNV:-13A,-12A,-3A	1	0	0	0	0	0	0	0	0	0	0	0
SNV:-16A,-12T,-7C,-1C	1	0	0	0	0	0	0	0	0	0	0	0
SNV:-7C,-2G,1C	0	1	0	0	0	0	0	0	0	0	0	0
SNV:-8G,-4T,-2C	0	1	0	0	0	0	0	0	0	0	0	0
SNV:-17T,-2G	0	1	0	0	0	0	0	0	0	0	0	0
SNV:-14C,-12A,-9T,-7C,-2G,-1C,2G,4A	0	1	0	0	0	0	0	0	0	0	0	0
SNV:-16G,-14C,-3A,5A	0	1	0	0	0	0	0	0	0	0	0	0
SNV:-16G,-15G,-5T,-4T,-1T,2C	0	1	0	0	0	0	0	0	0	0	0	0
SNV:-16G,-15G,-3A,1G	0	1	0	0	0	0	0	0	0	0	0	0
SNV:-16C,-5A	0	1	0	0	0	0	0	0	0	0	0	0
SNV:-13A,-9C,-6C,-5C,-2G,-1A	0	1	0	0	0	0	0	0	0	0	0	0
SNV:-7G,-4C,3C	0	1	0	0	0	0	0	0	0	0	0	0
SNV:-4C,1A	0	1	0	0	0	0	0	0	0	0	0	0
SNV:-12A,-4T,4A	0	1	0	0	0	0	0	0	0	0	0	0
SNV:2C,3T,4T,5C,6T	0	1	0	0	0	0	0	0	0	0	0	0
SNV:-11A,-10A,3C,4A	0	1	0	0	0	0	0	0	0	0	0	0
SNV:-16G,-5T,-4T,-3A,1G	0	1	0	0	0	0	0	0	0	0	0	0
SNV:-11A,-2C,-1C	0	1	0	0	0	0	0	0	0	0	0	0
SNV:-2G,4T	0	1	0	0	0	0	0	0	0	0	0	0
SNV:-11T,-8T	0	1	0	0	0	0	0	0	0	0	0	0
SNV:-17T,-5A,5A	0	1	0	0	0	0	0	0	0	0	0	0
SNV:-14C,6T	0	1	0	0	0	0	0	0	0	0	0	0
SNV:-5C,-4A,-1T	0	1	0	0	0	0	0	0	0	0	0	0
SNV:-6A,-1C	0	1	0	0	0	0	0	0	0	0	0	0
SNV:-14T,-13G	0	1	0	0	0	0	0	0	0	0	0	0
SNV:-13A,-11A,-4T,-2T,2T	0	1	0	0	0	0	0	0	0	0	0	0
SNV:-11A,-9T	0	1	0	0	0	0	0	0	0	0	0	0
SNV:-5T,2T	0	1	0	0	0	0	0	0	0	0	0	0
SNV:-14T,-13A	0	1	0	0	0	0	0	0	0	0	0	0
SNV:-14T,-12A,-9T,-7C,-2T	0	1	0	0	0	0	0	0	0	0	0	0
SNV:-16A,-12T,-9T,-7G,-5A,1G	0	1	0	0	0	0	0	0	0	0	0	0
SNV:-13A,-10T,-4C,-2C,2G	0	1	0	0	0	0	0	0	0	0	0	0
SNV:-8G,-7T	0	1	0	0	0	0	0	0	0	0	0	0
SNV:-4T,-2C,-1T,2T	0	1	0	0	0	0	0	0	0	0	0	0
SNV:-14T,-8T	0	1	0	0	0	0	0	0	0	0	0	0
SNV:-11A,-10A,4A	0	1	0	0	0	0	0	0	0	0	0	0
SNV:1C,4T	0	1	0	0	0	0	0	0	0	0	0	0
SNV:-10T,-9G,5A	0	1	0	0	0	0	0	0	0	0	0	0
SNV:-9G,-5A,-3G,-1C,5A	0	1	0	0	0	0	0	0	0	0	0	0
SNV:-7T,1A	0	1	0	0	0	0	0	0	0	0	0	0
SNV:-9C,-2C	0	1	0	0	0	0	0	0	0	0	0	0
SNV:-14T,-5A,-2T	0	1	0	0	0	0	0	0	0	0	0	0
SNV:-8T,-4A	0	1	0	0	0	0	0	0	0	0	0	0
SNV:3G,4T	0	1	0	0	0	0	0	0	0	0	0	0
SNV:-4A,-3G,-1C,1A,4T	0	1	0	0	0	0	0	0	0	0	0	0
SNV:3C,6C	0	1	0	0	0	0	0	0	0	0	0	0
SNV:-17T,-15G,3C	0	1	0	0	0	0	0	0	0	0	0	0
SNV:-17A,-5A,-3A,-2G,1A	0	1	0	0	0	0	0	0	0	0	0	0
SNV:-5C,-4C,-3G,-2C,6T	0	1	0	0	0	0	0	0	0	0	0	0
SNV:5C,6A	0	1	0	0	0	0	0	0	0	0	0	0
SNV:-5C,1A	0	0	1	0	0	0	0	0	0	0	0	0
SNV:-17A,-16G,-13A,-12A,-3A,1G	0	0	1	0	0	0	0	0	0	0	0	0
SNV:-12A,1G,2C	0	0	1	0	0	0	0	0	0	0	0	0
SNV:-6C,-4T,6T	0	0	1	0	0	0	0	0	0	0	0	0
SNV:-14C,5T	0	0	1	0	0	0	0	0	0	0	0	0
SNV:-6T,-4T,3T,4T	0	0	1	0	0	0	0	0	0	0	0	0
SNV:-15C,-1C,1C	0	0	1	0	0	0	0	0	0	0	0	0
SNV:-13T,1C	0	0	1	0	0	0	0	0	0	0	0	0
SNV:-14A,-13A,-9C,-7T,-5C,-4T,-1C,1C	0	0	1	0	0	0	0	0	0	0	0	0
SNV:1G,3G	0	0	1	0	0	0	0	0	0	0	0	0
SNV:-16C,-9C	0	0	1	0	0	0	0	0	0	0	0	0
SNV:-16G,-2C,-1T	0	0	1	0	0	0	0	0	0	0	0	0
SNV:-16C,-14T,-1C,1C	0	0	1	0	0	0	0	0	0	0	0	0
SNV:-13A,-9C,-7C,1A	0	0	1	0	0	0	0	0	0	0	0	0
SNV:-2G,1A,2G,4A	0	0	1	0	0	0	0	0	0	0	0	0
SNV:-12A,-10G,-9G,-5A	0	0	1	0	0	0	0	0	0	0	0	0
SNV:-10G,-5T,-2G	0	0	1	0	0	0	0	0	0	0	0	0
SNV:-7G,-1T,2G,5A	0	0	1	0	0	0	0	0	0	0	0	0
SNV:-9G,-7C,-3G,1G,2T	0	0	1	0	0	0	0	0	0	0	0	0
SNV:-16G,-3A,1G,2C	0	0	1	0	0	0	0	0	0	0	0	0
SNV:-4T,3C	0	0	1	0	0	0	0	0	0	0	0	0
SNV:-5C,-4C,-2G,1G	0	0	1	0	0	0	0	0	0	0	0	0
SNV:-17T,-7T	0	0	1	0	0	0	0	0	0	0	0	0
SNV:-16G,-12T,-1T,3T,5T	0	0	1	0	0	0	0	0	0	0	0	0
SNV:-14T,-1A	0	0	1	0	0	0	0	0	0	0	0	0
SNV:-13A,1G,3G,4A,6C	0	0	1	0	0	0	0	0	0	0	0	0
SNV:-13A,-1C,1A,2T	0	0	1	0	0	0	0	0	0	0	0	0
SNV:-14T,-4C	0	0	1	0	0	0	0	0	0	0	0	0
SNV:-13T,-12T	0	0	1	0	0	0	0	0	0	0	0	0
SNV:-13T,-4C	0	0	1	0	0	0	0	0	0	0	0	0
SNV:-10A,-9T	0	0	1	0	0	0	0	0	0	0	0	0
SNV:-15G,-14C,-7C,-3G,-2T,-1T	0	0	1	0	0	0	0	0	0	0	0	0
SNV:-14T,-7G	0	0	1	0	0	0	0	0	0	0	0	0
SNV:-11T,-10T,-9G,-4A	0	0	1	0	0	0	0	0	0	0	0	0
SNV:-7G,2G,3G	0	0	1	0	0	0	0	0	0	0	0	0
SNV:-13T,-4A	0	0	1	0	0	0	0	0	0	0	0	0
SNV:-4T,-3G	0	0	1	0	0	0	0	0	0	0	0	0
SNV:-4C,1A,3G	0	0	1	0	0	0	0	0	0	0	0	0
SNV:-12A,-1C,1C	0	0	1	0	0	0	0	0	0	0	0	0
SNV:-11A,-2T	0	0	1	0	0	0	0	0	0	0	0	0
SNV:2C,3T	0	0	1	0	0	0	0	0	0	0	0	0
SNV:-12T,-6T,2C	0	0	1	0	0	0	0	0	0	0	0	0
SNV:-13G,-3A,-1C,1A	0	0	1	0	0	0	0	0	0	0	0	0
SNV:-9G,-5T,3C	0	0	1	0	0	0	0	0	0	0	0	0
SNV:-16A,5A	0	0	1	0	0	0	0	0	0	0	0	0
SNV:-7C,-3G	0	0	1	0	0	0	0	0	0	0	0	0
SNV:-12A,-10T,-1C,1C	0	0	1	0	0	0	0	0	0	0	0	0
SNV:-6T,-5T,5T	0	0	1	0	0	0	0	0	0	0	0	0
SNV:-17A,-16G,-3A,1G	0	0	0	1	0	0	0	0	0	0	0	0
SNV:-10A,-9C	0	0	0	1	0	0	0	0	0	0	0	0
SNV:-14T,-7C	0	0	0	1	0	0	0	0	0	0	0	0
SNV:-1C,1A,3C,5A	0	0	0	1	0	0	0	0	0	0	0	0
SNV:-9T,-6C,-5C,5C,6T	0	0	0	1	0	0	0	0	0	0	0	0
SNV:-4T,2C,6A	0	0	0	1	0	0	0	0	0	0	0	0
SNV:-14T,-9C,-7C,-6T	0	0	0	1	0	0	0	0	0	0	0	0
SNV:-13A,-4C	0	0	0	1	0	0	0	0	0	0	0	0
SNV:-15G,-9G,-5A,1A	0	0	0	1	0	0	0	0	0	0	0	0
SNV:-16G,-12A,-9C,-3A,1G	0	0	0	1	0	0	0	0	0	0	0	0
SNV:-17A,-16G,-12A,2C	0	0	0	1	0	0	0	0	0	0	0	0
SNV:-4T,-2C,2C	0	0	0	1	0	0	0	0	0	0	0	0
SNV:-17A,-16G,-12A,-3A,1G	0	0	0	1	0	0	0	0	0	0	0	0
SNV:-13A,-7T,-2C	0	0	0	1	0	0	0	0	0	0	0	0
SNV:-9C,1C	0	0	0	1	0	0	0	0	0	0	0	0
SNV:-14C,-13G,-9C,3C	0	0	0	1	0	0	0	0	0	0	0	0
SNV:-1C,3C,4A	0	0	0	1	0	0	0	0	0	0	0	0
SNV:-9G,1G,4A	0	0	0	1	0	0	0	0	0	0	0	0
SNV:-5C,-3A,1G	0	0	0	1	0	0	0	0	0	0	0	0
SNV:-5C,-2C,-1C	0	0	0	1	0	0	0	0	0	0	0	0
SNV:-15G,1G	0	0	0	1	0	0	0	0	0	0	0	0
SNV:-15C,-1T,3G	0	0	0	1	0	0	0	0	0	0	0	0
SNV:-16C,-14T,-7G	0	0	0	1	0	0	0	0	0	0	0	0
SNV:-9C,-8G,-4T,-1T	0	0	0	1	0	0	0	0	0	0	0	0
SNV:-16G,-15G	0	0	0	1	0	0	0	0	0	0	0	0
SNV:-12A,-2T,-1T,2T,3T	0	0	0	1	0	0	0	0	0	0	0	0
SNV:-9G,-5A,5T	0	0	0	1	0	0	0	0	0	0	0	0
SNV:-14A,-13A,-9C,-6T,-1T	0	0	0	1	0	0	0	0	0	0	0	0
SNV:-3A,4A	0	0	0	1	0	0	0	0	0	0	0	0
SNV:-13T,-5A	0	0	0	1	0	0	0	0	0	0	0	0
SNV:-9C,-1A	0	0	0	1	0	0	0	0	0	0	0	0
SNV:-13T,-6T,-4T,-2C,1C	0	0	0	1	0	0	0	0	0	0	0	0
SNV:-6T,-4T,-1T,1C	0	0	0	1	0	0	0	0	0	0	0	0
SNV:-1T,2T	0	0	0	1	0	0	0	0	0	0	0	0
SNV:-13A,-5T,-4T,-1T	0	0	0	1	0	0	0	0	0	0	0	0
SNV:1C,3C,4G	0	0	0	1	0	0	0	0	0	0	0	0
SNV:-12A,-7C	0	0	0	1	0	0	0	0	0	0	0	0
SNV:-5C,-2C,1A	0	0	0	1	0	0	0	0	0	0	0	0
SNV:-9G,-5A,-1C,3C	0	0	0	1	0	0	0	0	0	0	0	0
SNV:-14C,4A	0	0	0	1	0	0	0	0	0	0	0	0
SNV:-2C,6T	0	0	0	1	0	0	0	0	0	0	0	0
SNV:1C,4A,5A	0	0	0	1	0	0	0	0	0	0	0	0
SNV:-13A,2C	0	0	0	1	0	0	0	0	0	0	0	0
SNV:-5A,3T	0	0	0	1	0	0	0	0	0	0	0	0
SNV:-16G,1G	0	0	0	1	0	0	0	0	0	0	0	0
SNV:-2C,1G	0	0	0	1	0	0	0	0	0	0	0	0
SNV:-14C,-3G	0	0	0	1	0	0	0	0	0	0	0	0
SNV:-16G,-14C	0	0	0	1	0	0	0	0	0	0	0	0
SNV:-16A,3C	0	0	0	1	0	0	0	0	0	0	0	0
SNV:-1C,2T,5C	0	0	0	1	0	0	0	0	0	0	0	0
SNV:-14T,-9T	0	0	0	1	0	0	0	0	0	0	0	0
SNV:-6A,-1C,1A	0	0	0	1	0	0	0	0	0	0	0	0
SNV:-15C,-9C	0	0	0	1	0	0	0	0	0	0	0	0
SNV:-11A,-10A,3C	0	0	0	1	0	0	0	0	0	0	0	0
SNV:-2T,1C	0	0	0	1	0	0	0	0	0	0	0	0
SNV:-14C,-6T	0	0	0	1	0	0	0	0	0	0	0	0
SNV:-14C,-2G,-1T,6T	0	0	0	1	0	0	0	0	0	0	0	0
SNV:-9T,1A,4A	0	0	0	1	0	0	0	0	0	0	0	0
SNV:-9C,-2G	0	0	0	1	0	0	0	0	0	0	0	0
SNV:-6T,-3G,-1A	0	0	0	1	0	0	0	0	0	0	0	0
SNV:-16G,-15G,-10T	0	0	0	1	0	0	0	0	0	0	0	0
SNV:-17T,-16G,-5A,-1C,5C	0	0	0	0	1	0	0	0	0	0	0	0
SNV:-9T,-2G,1C,3T,6A	0	0	0	0	1	0	0	0	0	0	0	0
SNV:-5A,-3G,3C	0	0	0	0	1	0	0	0	0	0	0	0
SNV:-17A,-16G,-10G	0	0	0	0	1	0	0	0	0	0	0	0
SNV:-10T,-3G	0	0	0	0	1	0	0	0	0	0	0	0
SNV:-5T,-4T,2C	0	0	0	0	1	0	0	0	0	0	0	0
SNV:-5A,-4A,-2G	0	0	0	0	1	0	0	0	0	0	0	0
SNV:-17T,-11A,-5A,1A,5A	0	0	0	0	1	0	0	0	0	0	0	0
SNV:-17T,-11A,-1C	0	0	0	0	1	0	0	0	0	0	0	0
SNV:-9G,-5C,-2C,-1T	0	0	0	0	1	0	0	0	0	0	0	0
SNV:-15G,-9G,-5A	0	0	0	0	1	0	0	0	0	0	0	0
SNV:-13T,-12T,-7C,-5C,3G,4T	0	0	0	0	1	0	0	0	0	0	0	0
SNV:-17A,-16G,-7C	0	0	0	0	1	0	0	0	0	0	0	0
SNV:-9T,-7C,-5T	0	0	0	0	1	0	0	0	0	0	0	0
SNV:-7C,-2T,1C	0	0	0	0	1	0	0	0	0	0	0	0
SNV:-10A,-1T	0	0	0	0	1	0	0	0	0	0	0	0
SNV:-15G,-9G,-1C,1A	0	0	0	0	1	0	0	0	0	0	0	0
SNV:-16G,-12A,-5A,-1C	0	0	0	0	1	0	0	0	0	0	0	0
SNV:-7C,1A	0	0	0	0	1	0	0	0	0	0	0	0
SNV:-16G,-5T	0	0	0	0	1	0	0	0	0	0	0	0
SNV:-10T,-5C,5A	0	0	0	0	1	0	0	0	0	0	0	0
SNV:-15G,-3A,1A,3C	0	0	0	0	1	0	0	0	0	0	0	0
SNV:-16A,-9G,-5A,-1C,1A,3C,5A	0	0	0	0	1	0	0	0	0	0	0	0
SNV:-16G,-9G,-1C,1A,5A	0	0	0	0	1	0	0	0	0	0	0	0
SNV:-13A,-10T,-9T,1A	0	0	0	0	1	0	0	0	0	0	0	0
SNV:-13G,-12A,-11A,-10G,-8A,-4A,-2T,6T	0	0	0	0	1	0	0	0	0	0	0	0
SNV:-8A,4A	0	0	0	0	1	0	0	0	0	0	0	0
SNV:-14C,-5A,4A	0	0	0	0	1	0	0	0	0	0	0	0
SNV:-17A,-12A,-3G,1A	0	0	0	0	1	0	0	0	0	0	0	0
SNV:-17A,-16G,1A,3C	0	0	0	0	1	0	0	0	0	0	0	0
SNV:-6A,-2T,-1A	0	0	0	0	1	0	0	0	0	0	0	0
SNV:-17A,5A	0	0	0	0	1	0	0	0	0	0	0	0
SNV:-17G,-12A,-11G,2C	0	0	0	0	1	0	0	0	0	0	0	0
SNV:2C,6C	0	0	0	0	1	0	0	0	0	0	0	0
SNV:-9T,-4C	0	0	0	0	1	0	0	0	0	0	0	0
SNV:-9G,-5A,1A,6T	0	0	0	0	1	0	0	0	0	0	0	0
SNV:-9T,6C	0	0	0	0	1	0	0	0	0	0	0	0
SNV:-9C,-3A,3T	0	0	0	0	1	0	0	0	0	0	0	0
SNV:-16G,1A,6T	0	0	0	0	1	0	0	0	0	0	0	0
SNV:-17A,-16G,-14C	0	0	0	0	1	0	0	0	0	0	0	0
SNV:-3G,2G	0	0	0	0	1	0	0	0	0	0	0	0
SNV:-15G,-12A,-11A,-5A,-1C,3C,6T	0	0	0	0	1	0	0	0	0	0	0	0
SNV:-10T,3C	0	0	0	0	1	0	0	0	0	0	0	0
SNV:-16G,-3G	0	0	0	0	1	0	0	0	0	0	0	0
SNV:-9G,-4C,-1T,1A	0	0	0	0	1	0	0	0	0	0	0	0
SNV:-9G,3C,6T	0	0	0	0	1	0	0	0	0	0	0	0
SNV:-11A,-3G	0	0	0	0	1	0	0	0	0	0	0	0
SNV:-15G,-3G,1A,5A	0	0	0	0	1	0	0	0	0	0	0	0
SNV:-12A,-9G,-7C,-4C,-2T	0	0	0	0	1	0	0	0	0	0	0	0
SNV:-15G,-3T	0	0	0	0	1	0	0	0	0	0	0	0
SNV:-17A,-9G,1A,5A	0	0	0	0	1	0	0	0	0	0	0	0
SNV:2T,6A	0	0	0	0	1	0	0	0	0	0	0	0
SNV:-16G,-9T,-5A	0	0	0	0	1	0	0	0	0	0	0	0
SNV:-9T,4A,6C	0	0	0	0	1	0	0	0	0	0	0	0
SNV:-14C,-13A,-10T,-5A	0	0	0	0	1	0	0	0	0	0	0	0
SNV:-17A,-14T,-5A,5A	0	0	0	0	1	0	0	0	0	0	0	0
SNV:-14C,-10T	0	0	0	0	1	0	0	0	0	0	0	0
SNV:-6A,1C,3C	0	0	0	0	1	0	0	0	0	0	0	0
SNV:-6T,-4T,4T	0	0	0	0	1	0	0	0	0	0	0	0
SNV:-3G,2T	0	0	0	0	1	0	0	0	0	0	0	0
SNV:-7G,-2G,1A,3C,6C	0	0	0	0	1	0	0	0	0	0	0	0
SNV:-16G,-10T,-3G	0	0	0	0	1	0	0	0	0	0	0	0
SNV:-16G,-7C	0	0	0	0	1	0	0	0	0	0	0	0
SNV:-9G,1G	0	0	0	0	1	0	0	0	0	0	0	0
SNV:-17A,5C	0	0	0	0	1	0	0	0	0	0	0	0
SNV:-6C,1A	0	0	0	0	1	0	0	0	0	0	0	0
SNV:-6A,-5T	0	0	0	0	1	0	0	0	0	0	0	0
SNV:-11A,-10T,-9G	0	0	0	0	1	0	0	0	0	0	0	0
SNV:-16G,-12A,-9G,-3G	0	0	0	0	1	0	0	0	0	0	0	0
SNV:-7T,-6T,-2C,-1T	0	0	0	0	1	0	0	0	0	0	0	0
SNV:-6A,6A	0	0	0	0	1	0	0	0	0	0	0	0
SNV:-12A,-5A,6T	0	0	0	0	1	0	0	0	0	0	0	0
SNV:-15C,-12A	0	0	0	0	1	0	0	0	0	0	0	0
SNV:-14A,-9C,-1T,3C	0	0	0	0	1	0	0	0	0	0	0	0
SNV:-17A,-16G,-9G,-5A,-1C	0	0	0	0	1	0	0	0	0	0	0	0
SNV:-14T,-12T,-4A	0	0	0	0	1	0	0	0	0	0	0	0
SNV:-14C,-12G,-5A	0	0	0	0	1	0	0	0	0	0	0	0
SNV:-15C,-5A	0	0	0	0	1	0	0	0	0	0	0	0
SNV:-16G,-5A,-3G,1A,3C	0	0	0	0	1	0	0	0	0	0	0	0
SNV:-16G,-11A,-3G,1A,5A	0	0	0	0	1	0	0	0	0	0	0	0
SNV:-13T,-12T,-4C,3C	0	0	0	0	1	0	0	0	0	0	0	0
SNV:-4A,-3A,-1A,3T	0	0	0	0	1	0	0	0	0	0	0	0
SNV:-9T,-7C,1A	0	0	0	0	1	0	0	0	0	0	0	0
SNV:-16G,-9G,-5A,1A	0	0	0	0	1	0	0	0	0	0	0	0
SNV:-4A,-2G,-1A	0	0	0	0	1	0	0	0	0	0	0	0
SNV:-13A,2G	0	0	0	0	1	0	0	0	0	0	0	0
SNV:-10G,-5A,1A,2G	0	0	0	0	1	0	0	0	0	0	0	0
SNV:-4T,-2C,6T	0	0	0	0	1	0	0	0	0	0	0	0
SNV:-13A,-5T,-4T,-3G,-2C,-1T,2G	0	0	0	0	1	0	0	0	0	0	0	0
SNV:-7G,-5A,2T	0	0	0	0	1	0	0	0	0	0	0	0
SNV:-2G,2C	0	0	0	0	1	0	0	0	0	0	0	0
SNV:-10G,-2C	0	0	0	0	1	0	0	0	0	0	0	0
SNV:-10G,-5A,-3T	0	0	0	0	1	0	0	0	0	0	0	0
SNV:-16G,-10G,-4A,-2T,5T	0	0	0	0	1	0	0	0	0	0	0	0
SNV:-4C,-2T	0	0	0	0	1	0	0	0	0	0	0	0
SNV:-1C,3C,5A	0	0	0	0	1	0	0	0	0	0	0	0
SNV:-17A,-12A,-11A,-9G	0	0	0	0	1	0	0	0	0	0	0	0
SNV:-14C,6C	0	0	0	0	1	0	0	0	0	0	0	0
SNV:-9G,-4A	0	0	0	0	1	0	0	0	0	0	0	0
SNV:-9T,-5A,2T,6A	0	0	0	0	1	0	0	0	0	0	0	0
SNV:-6C,-5T,-1C,3G	0	0	0	0	1	0	0	0	0	0	0	0
SNV:-3A,-1C,3G	0	0	0	0	1	0	0	0	0	0	0	0
SNV:-6T,1G,6T	0	0	0	0	1	0	0	0	0	0	0	0
SNV:-10G,-6A,-1A,3G	0	0	0	0	1	0	0	0	0	0	0	0
SNV:-13A,6C	0	0	0	0	1	0	0	0	0	0	0	0
SNV:-16G,-1T	0	0	0	0	1	0	0	0	0	0	0	0
SNV:-13A,-12G,-9T	0	0	0	0	1	0	0	0	0	0	0	0
SNV:-9G,-5A,-2C	0	0	0	0	1	0	0	0	0	0	0	0
SNV:-5A,1G	0	0	0	0	1	0	0	0	0	0	0	0
SNV:-13T,-11A,-1T	0	0	0	0	1	0	0	0	0	0	0	0
SNV:-10T,1A,5A	0	0	0	0	1	0	0	0	0	0	0	0
SNV:-17A,-9G,-5A,1A,3C	0	0	0	0	1	0	0	0	0	0	0	0
SNV:-9G,-5A,-3G,6C	0	0	0	0	1	0	0	0	0	0	0	0
SNV:-16G,-3G,1A	0	0	0	0	1	0	0	0	0	0	0	0
SNV:-5C,-3G,3C	0	0	0	0	1	0	0	0	0	0	0	0
SNV:-17A,-2C	0	0	0	0	1	0	0	0	0	0	0	0
SNV:-10T,-5A,1A	0	0	0	0	1	0	0	0	0	0	0	0
SNV:-5C,-4A	0	0	0	0	1	0	0	0	0	0	0	0
SNV:-17A,-10G,-5A,5A	0	0	0	0	1	0	0	0	0	0	0	0
SNV:-13A,-9C,-6T,-4T,-1T	0	0	0	0	1	0	0	0	0	0	0	0
SNV:-13A,-1A	0	0	0	0	1	0	0	0	0	0	0	0
SNV:-17A,-11A,-5A,1A	0	0	0	0	1	0	0	0	0	0	0	0
SNV:-9G,3C,5C	0	0	0	0	1	0	0	0	0	0	0	0
SNV:-16G,-13G	0	0	0	0	1	0	0	0	0	0	0	0
SNV:-3G,-2G,2G	0	0	0	0	1	0	0	0	0	0	0	0
SNV:-5T,-2C,-1T,2C	0	0	0	0	1	0	0	0	0	0	0	0
SNV:-2C,3T	0	0	0	0	1	0	0	0	0	0	0	0
SNV:-5A,-4A,-2T	0	0	0	0	1	0	0	0	0	0	0	0
SNV:-15A,-7T	0	0	0	0	1	0	0	0	0	0	0	0
SNV:-9T,-6T	0	0	0	0	1	0	0	0	0	0	0	0
SNV:-6A,-3G,-2C	0	0	0	0	1	0	0	0	0	0	0	0
SNV:-9T,1G	0	0	0	0	1	0	0	0	0	0	0	0
SNV:-10A,-4C	0	0	0	0	1	0	0	0	0	0	0	0
SNV:-13T,6A	0	0	0	0	1	0	0	0	0	0	0	0
SNV:-7T,6T	0	0	0	0	1	0	0	0	0	0	0	0
SNV:-9T,-7C	0	0	0	0	1	0	0	0	0	0	0	0
SNV:-6A,1G	0	0	0	0	1	0	0	0	0	0	0	0
SNV:-1T,2C,6T	0	0	0	0	1	0	0	0	0	0	0	0
SNV:-6C,-3A,-2C,6C	0	0	0	0	1	0	0	0	0	0	0	0
SNV:-4C,1A,4A	0	0	0	0	1	0	0	0	0	0	0	0
SNV:-6C,-1C,1C,2T,3C	0	0	0	0	1	0	0	0	0	0	0	0
SNV:-17A,-12A,6T	0	0	0	0	1	0	0	0	0	0	0	0
SNV:-9T,6T	0	0	0	0	1	0	0	0	0	0	0	0
SNV:-17A,-2T,6T	0	0	0	0	1	0	0	0	0	0	0	0
SNV:-14T,-6T,5T,6A	0	0	0	0	1	0	0	0	0	0	0	0
SNV:-16G,-11A,-3A	0	0	0	0	1	0	0	0	0	0	0	0
SNV:-13G,-12A,-11T,-10A,-5C,-4T,-3T,3T	0	0	0	0	1	0	0	0	0	0	0	0
SNV:-14C,-6T,1G,5T	0	0	0	0	1	0	0	0	0	0	0	0
SNV:-3T,-1T	0	0	0	0	1	0	0	0	0	0	0	0
SNV:-16A,-13T,3C	0	0	0	0	1	0	0	0	0	0	0	0
SNV:-16G,-5A,2T,5A	0	0	0	0	1	0	0	0	0	0	0	0
SNV:-3A,4G,6T	0	0	0	0	1	0	0	0	0	0	0	0
SNV:-10T,-6C,-3A,6C	0	0	0	0	1	0	0	0	0	0	0	0
SNV:-9T,-5A,-3G,1A	0	0	0	0	1	0	0	0	0	0	0	0
SNV:-9T,-5A,-3G	0	0	0	0	1	0	0	0	0	0	0	0
SNV:-12G,2T	0	0	0	0	1	0	0	0	0	0	0	0
SNV:-10G,-9G,-5A	0	0	0	0	1	0	0	0	0	0	0	0
SNV:-13A,-9G	0	0	0	0	1	0	0	0	0	0	0	0
SNV:-10T,-9T,-5A	0	0	0	0	1	0	0	0	0	0	0	0
SNV:-1T,3T,6C	0	0	0	0	1	0	0	0	0	0	0	0
SNV:-4T,6T	0	0	0	0	1	0	0	0	0	0	0	0
SNV:-13A,-11A,2T	0	0	0	0	1	0	0	0	0	0	0	0
SNV:-16G,-15G,-12A,-3A,1G	0	0	0	0	1	0	0	0	0	0	0	0
SNV:-12G,-10T	0	0	0	0	1	0	0	0	0	0	0	0
SNV:-17A,-11A,1C	0	0	0	0	1	0	0	0	0	0	0	0
SNV:-10A,-9G	0	0	0	0	1	0	0	0	0	0	0	0
SNV:-16G,-13G,-9G	0	0	0	0	1	0	0	0	0	0	0	0
SNV:-9G,-6A	0	0	0	0	1	0	0	0	0	0	0	0
SNV:-5C,-4T,-2G,-1A	0	0	0	0	1	0	0	0	0	0	0	0
SNV:-5C,-4A,-3G	0	0	0	0	1	0	0	0	0	0	0	0
SNV:1G,4A	0	0	0	0	1	0	0	0	0	0	0	0
SNV:-14C,-13T,-12T,4T	0	0	0	0	1	0	0	0	0	0	0	0
SNV:-15G,-9G,-3T	0	0	0	0	1	0	0	0	0	0	0	0
SNV:-5T,-4T,-2T	0	0	0	0	1	0	0	0	0	0	0	0
SNV:-5A,-1T,1A	0	0	0	0	1	0	0	0	0	0	0	0
SNV:-16G,-9T,-3G,6T	0	0	0	0	1	0	0	0	0	0	0	0
SNV:-2T,5C	0	0	0	0	1	0	0	0	0	0	0	0
SNV:-11G,2C	0	0	0	0	1	0	0	0	0	0	0	0
SNV:-9T,-6T,-2G,-1C,1A	0	0	0	0	1	0	0	0	0	0	0	0
SNV:-6T,-5T,3G	0	0	0	0	1	0	0	0	0	0	0	0
SNV:-13A,-10T,-9T,-7C,-5A	0	0	0	0	1	0	0	0	0	0	0	0
SNV:-2G,2T	0	0	0	0	1	0	0	0	0	0	0	0
SNV:-7C,-1T	0	0	0	0	1	0	0	0	0	0	0	0
SNV:-16G,1A,5A	0	0	0	0	1	0	0	0	0	0	0	0
SNV:-4C,-3A	0	0	0	0	1	0	0	0	0	0	0	0
SNV:-5C,-1C	0	0	0	0	1	0	0	0	0	0	0	0
SNV:-10T,-5A,5A,6T	0	0	0	0	1	0	0	0	0	0	0	0
SNV:-13A,-1A,2T	0	0	0	0	1	0	0	0	0	0	0	0
SNV:-17A,-13A,-5C,6T	0	0	0	0	1	0	0	0	0	0	0	0
SNV:-16C,-13A,-9C,-6C,-5C,-4T,1G	0	0	0	0	1	0	0	0	0	0	0	0
SNV:-5A,-2G,-1C,1A	0	0	0	0	1	0	0	0	0	0	0	0
SNV:-12A,1A	0	0	0	0	1	0	0	0	0	0	0	0
SNV:-16A,-9G,6C	0	0	0	0	1	0	0	0	0	0	0	0
SNV:-6T,-1T,5T,6T	0	0	0	0	1	0	0	0	0	0	0	0
SNV:-14T,-3A,2C	0	0	0	0	1	0	0	0	0	0	0	0
SNV:-17A,-5T,-3A	0	0	0	0	1	0	0	0	0	0	0	0
SNV:-14A,6C	0	0	0	0	1	0	0	0	0	0	0	0
SNV:-16G,-9G,-5A,6T	0	0	0	0	1	0	0	0	0	0	0	0
SNV:-17A,-5A,3C	0	0	0	0	1	0	0	0	0	0	0	0
SNV:-12A,-9G,-5A	0	0	0	0	1	0	0	0	0	0	0	0
SNV:-4T,2T,3G	0	0	0	0	1	0	0	0	0	0	0	0
SNV:-16A,-5A,1A,6T	0	0	0	0	1	0	0	0	0	0	0	0
SNV:1A,5C,6T	0	0	0	0	1	0	0	0	0	0	0	0
SNV:-5T,3C	0	0	0	0	1	0	0	0	0	0	0	0
SNV:-16A,-12A,-2T,1C	0	0	0	0	1	0	0	0	0	0	0	0
SNV:-1C,5A	0	0	0	0	1	0	0	0	0	0	0	0
SNV:-12A,-3A	0	0	0	0	1	0	0	0	0	0	0	0
SNV:-16G,-9G,-5A,5A	0	0	0	0	1	0	0	0	0	0	0	0
SNV:-4T,5T	0	0	0	0	1	0	0	0	0	0	0	0
SNV:-14A,-13A,-8G,-1T	0	0	0	0	1	0	0	0	0	0	0	0
SNV:-3A,-2C,2G	0	0	0	0	1	0	0	0	0	0	0	0
SNV:-10A,-5T,2G	0	0	0	0	1	0	0	0	0	0	0	0
SNV:-14C,-13A,-5A,-3G,-1C	0	0	0	0	1	0	0	0	0	0	0	0
SNV:-13A,6T	0	0	0	0	1	0	0	0	0	0	0	0
SNV:-9G,1A,4G	0	0	0	0	1	0	0	0	0	0	0	0
SNV:-17A,-16G,6T	0	0	0	0	1	0	0	0	0	0	0	0
SNV:-9G,-4T	0	0	0	0	1	0	0	0	0	0	0	0
SNV:-6T,1A	0	0	0	0	1	0	0	0	0	0	0	0
SNV:2C,6T	0	0	0	0	1	0	0	0	0	0	0	0
SNV:-9G,-5T,6T	0	0	0	0	1	0	0	0	0	0	0	0
SNV:-1A,5T	0	0	0	0	1	0	0	0	0	0	0	0
SNV:-16G,-3A,5A	0	0	0	0	1	0	0	0	0	0	0	0
SNV:-3A,6T	0	0	0	0	1	0	0	0	0	0	0	0
SNV:-13A,-5A,1G	0	0	0	0	1	0	0	0	0	0	0	0
SNV:-1C,2T,3C	0	0	0	0	1	0	0	0	0	0	0	0
SNV:-5A,-4T,-1A,1G,3T	0	0	0	0	1	0	0	0	0	0	0	0
SNV:-9G,-4C,-2G,5C	0	0	0	0	1	0	0	0	0	0	0	0
SNV:-12A,-9T,-7C,-4C	0	0	0	0	1	0	0	0	0	0	0	0
SNV:-17T,-13A,6T	0	0	0	0	1	0	0	0	0	0	0	0
SNV:-14T,-4T,2C	0	0	0	0	1	0	0	0	0	0	0	0
SNV:-16A,-15G,-5A	0	0	0	0	1	0	0	0	0	0	0	0
SNV:-16A,-1T	0	0	0	0	1	0	0	0	0	0	0	0
SNV:-17A,-2C,-1T,6T	0	0	0	0	1	0	0	0	0	0	0	0
SNV:-15G,-1T	0	0	0	0	1	0	0	0	0	0	0	0
SNV:-12T,-1T	0	0	0	0	1	0	0	0	0	0	0	0
SNV:-17A,-16G,-14T,-12A,-5T,1G,2C	0	0	0	0	1	0	0	0	0	0	0	0
SNV:-17A,-16G,-15G,-12A,-3A,1G	0	0	0	0	1	0	0	0	0	0	0	0
SNV:-16G,-11A,-5A	0	0	0	0	1	0	0	0	0	0	0	0
SNV:-12G,-2G	0	0	0	0	1	0	0	0	0	0	0	0
SNV:-16A,-10T,-9G,-5A,-3G	0	0	0	0	1	0	0	0	0	0	0	0
SNV:-17A,-16G,-5C	0	0	0	0	1	0	0	0	0	0	0	0
SNV:-17A,-16G,-12A,-7G	0	0	0	0	1	0	0	0	0	0	0	0
SNV:-16G,-9G,5A	0	0	0	0	1	0	0	0	0	0	0	0
SNV:-4T,-1C	0	0	0	0	1	0	0	0	0	0	0	0
SNV:-17A,-16G,-1C,1A,2T	0	0	0	0	1	0	0	0	0	0	0	0
SNV:-4T,5A	0	0	0	0	1	0	0	0	0	0	0	0
SNV:-16G,-11A,-10A,-6T,3C,6T	0	0	0	0	1	0	0	0	0	0	0	0
SNV:-9T,-6T,1G	0	0	0	0	1	0	0	0	0	0	0	0
SNV:-9T,-2G	0	0	0	0	1	0	0	0	0	0	0	0
SNV:-6T,-3A,3T	0	0	0	0	1	0	0	0	0	0	0	0
SNV:-13G,-5C	0	0	0	0	1	0	0	0	0	0	0	0
SNV:-14C,-10A,-2G,1G	0	0	0	0	1	0	0	0	0	0	0	0
SNV:-16A,-7C	0	0	0	0	1	0	0	0	0	0	0	0
SNV:-11A,-7T	0	0	0	0	1	0	0	0	0	0	0	0
SNV:-9T,-6T,-4T,-1T,5T,6T	0	0	0	0	1	0	0	0	0	0	0	0
SNV:-4C,-2G	0	0	0	0	1	0	0	0	0	0	0	0
SNV:-14C,-12A	0	0	0	0	1	0	0	0	0	0	0	0
SNV:-2C,-1C,1G,3C	0	0	0	0	1	0	0	0	0	0	0	0
SNV:-13G,-10G,-9G,-8G,-7G,-3G,-2G,1G	0	0	0	0	1	0	0	0	0	0	0	0
SNV:-12G,-3G	0	0	0	0	1	0	0	0	0	0	0	0
SNV:1C,2T	0	0	0	0	1	0	0	0	0	0	0	0
SNV:-16G,-2G,1A,6A	0	0	0	0	0	1	0	0	0	0	0	0
SNV:-10T,-1C	0	0	0	0	0	1	0	0	0	0	0	0
SNV:-6T,-4A	0	0	0	0	0	1	0	0	0	0	0	0
SNV:-1C,5C	0	0	0	0	0	1	0	0	0	0	0	0
SNV:-10G,5T,6A	0	0	0	0	0	1	0	0	0	0	0	0
SNV:-3A,-1C,1C	0	0	0	0	0	1	0	0	0	0	0	0
SNV:-17T,-3A	0	0	0	0	0	1	0	0	0	0	0	0
SNV:-5T,-4T,-1T	0	0	0	0	0	1	0	0	0	0	0	0
SNV:-7G,-2G	0	0	0	0	0	1	0	0	0	0	0	0
SNV:-9T,-2C	0	0	0	0	0	1	0	0	0	0	0	0
SNV:-10T,-2C,-1A,1G,5T	0	0	0	0	0	1	0	0	0	0	0	0
SNV:-12T,-9T,-5A,-2C	0	0	0	0	0	1	0	0	0	0	0	0
SNV:-6C,-1T	0	0	0	0	0	1	0	0	0	0	0	0
SNV:-9C,-5T,-4T,-1C,2T,3C	0	0	0	0	0	1	0	0	0	0	0	0
SNV:-1C,1C,6A	0	0	0	0	0	1	0	0	0	0	0	0
SNV:-6C,-1C	0	0	0	0	0	1	0	0	0	0	0	0
SNV:-14A,-6T,-4T	0	0	0	0	0	1	0	0	0	0	0	0
SNV:-16A,-6T	0	0	0	0	0	1	0	0	0	0	0	0
SNV:-16A,-15C,4A	0	0	0	0	0	1	0	0	0	0	0	0
SNV:-7C,-5T	0	0	0	0	0	1	0	0	0	0	0	0
SNV:-8G,-2T	0	0	0	0	0	1	0	0	0	0	0	0
SNV:-3G,-1C	0	0	0	0	0	1	0	0	0	0	0	0
SNV:-16A,-9G,-5A,1A	0	0	0	0	0	1	0	0	0	0	0	0
SNV:-12A,-1T	0	0	0	0	0	1	0	0	0	0	0	0
SNV:-7G,-5A,-1C	0	0	0	0	0	1	0	0	0	0	0	0
SNV:-5A,1C	0	0	0	0	0	1	0	0	0	0	0	0
SNV:-2C,-1A,1C	0	0	0	0	0	1	0	0	0	0	0	0
SNV:-14T,-9C,-6C,-3G,-1C	0	0	0	0	0	1	0	0	0	0	0	0
SNV:-9T,4A	0	0	0	0	0	1	0	0	0	0	0	0
SNV:-7T,-2T,-1C,1C	0	0	0	0	0	1	0	0	0	0	0	0
SNV:-9T,-5C,-1C,1A	0	0	0	0	0	1	0	0	0	0	0	0
SNV:-7C,4A	0	0	0	0	0	1	0	0	0	0	0	0
SNV:1C,3C,5T	0	0	0	0	0	1	0	0	0	0	0	0
SNV:-1C,1C,3T	0	0	0	0	0	1	0	0	0	0	0	0
SNV:-4A,-1A	0	0	0	0	0	1	0	0	0	0	0	0
SNV:-1C,1A,3T	0	0	0	0	0	1	0	0	0	0	0	0
SNV:2T,3C	0	0	0	0	0	1	0	0	0	0	0	0
SNV:-5A,-2C,-1A	0	0	0	0	0	1	0	0	0	0	0	0
SNV:1G,4A,6C	0	0	0	0	0	1	0	0	0	0	0	0
SNV:-8A,-2T	0	0	0	0	0	1	0	0	0	0	0	0
SNV:-12G,-8G	0	0	0	0	0	1	0	0	0	0	0	0
SNV:-11G,-3T	0	0	0	0	0	1	0	0	0	0	0	0
SNV:-14A,-12T,-6C,-5T,-4T,-2T	0	0	0	0	0	1	0	0	0	0	0	0
SNV:-2C,1C,3C	0	0	0	0	0	1	0	0	0	0	0	0
SNV:-5A,-4A	0	0	0	0	0	1	0	0	0	0	0	0
SNV:-10A,-2C	0	0	0	0	0	1	0	0	0	0	0	0
SNV:-14C,-6A,5T	0	0	0	0	0	1	0	0	0	0	0	0
SNV:-2C,1C	0	0	0	0	0	1	0	0	0	0	0	0
SNV:-14A,-13A,-5C,-1T	0	0	0	0	0	1	0	0	0	0	0	0
SNV:1C,3C,4A	0	0	0	0	0	1	0	0	0	0	0	0
SNV:-2G,2G	0	0	0	0	0	1	0	0	0	0	0	0
SNV:-14T,-4C,2C	0	0	0	0	0	1	0	0	0	0	0	0
SNV:-16G,-13A,-3A,1G	0	0	0	0	0	1	0	0	0	0	0	0
SNV:3G,5A	0	0	0	0	0	1	0	0	0	0	0	0
SNV:-13A,-4T,-2T,-1T	0	0	0	0	0	1	0	0	0	0	0	0
SNV:-13A,-4T,-3A,-2T,-1T	0	0	0	0	0	1	0	0	0	0	0	0
SNV:-6T,-5T,-1C	0	0	0	0	0	1	0	0	0	0	0	0
SNV:-2G,-1T	0	0	0	0	0	1	0	0	0	0	0	0
SNV:-13G,-1C,1C	0	0	0	0	0	1	0	0	0	0	0	0
SNV:-11A,1G	0	0	0	0	0	1	0	0	0	0	0	0
SNV:-10G,-7T,-5T,5T,6T	0	0	0	0	0	1	0	0	0	0	0	0
SNV:-6T,6A	0	0	0	0	0	1	0	0	0	0	0	0
SNV:-16G,-2C,-1C,1C	0	0	0	0	0	1	0	0	0	0	0	0
SNV:-14A,-9C	0	0	0	0	0	1	0	0	0	0	0	0
SNV:-9C,-7T	0	0	0	0	0	1	0	0	0	0	0	0
SNV:-2C,-1C,1A	0	0	0	0	0	1	0	0	0	0	0	0
SNV:1C,3C,4G,5A	0	0	0	0	0	1	0	0	0	0	0	0
SNV:-5T,-2T,-1C,1C,3C	0	0	0	0	0	1	0	0	0	0	0	0
SNV:-17T,-10T,-5A	0	0	0	0	0	1	0	0	0	0	0	0
SNV:-4T,-1T,2C	0	0	0	0	0	0	1	0	0	0	0	0
SNV:-9G,-3G,4A	0	0	0	0	0	0	1	0	0	0	0	0
SNV:-17A,2C	0	0	0	0	0	0	1	0	0	0	0	0
SNV:-17T,-15G,-9G,1A,3C	0	0	0	0	0	0	1	0	0	0	0	0
SNV:-14T,-8T,5T	0	0	0	0	0	0	1	0	0	0	0	0
SNV:-7G,-2G,-1T	0	0	0	0	0	0	1	0	0	0	0	0
SNV:-15G,6T	0	0	0	0	0	0	1	0	0	0	0	0
SNV:-4C,-3G,1C	0	0	0	0	0	0	1	0	0	0	0	0
SNV:-13A,-12A,-11A,-10A,-8A	0	0	0	0	0	0	1	0	0	0	0	0
SNV:-5A,1A,3C	0	0	0	0	0	0	1	0	0	0	0	0
SNV:-9C,-4T	0	0	0	0	0	0	1	0	0	0	0	0
SNV:-16G,-15G,-12A,-3A,1G,2C	0	0	0	0	0	0	1	0	0	0	0	0
SNV:-4T,-2T,-1T,1A,3C	0	0	0	0	0	0	1	0	0	0	0	0
SNV:-2C,-1T,1A	0	0	0	0	0	0	1	0	0	0	0	0
SNV:-7T,-5A	0	0	0	0	0	0	1	0	0	0	0	0
SNV:-11A,-5A,1A	0	0	0	0	0	0	1	0	0	0	0	0
SNV:-12A,-5C	0	0	0	0	0	0	1	0	0	0	0	0
SNV:1G,5C	0	0	0	0	0	0	1	0	0	0	0	0
SNV:-14C,-12T,-10T,-5A,5A	0	0	0	0	0	0	1	0	0	0	0	0
SNV:-5A,-2G	0	0	0	0	0	0	1	0	0	0	0	0
SNV:-9G,1C	0	0	0	0	0	0	1	0	0	0	0	0
SNV:-1C,3G	0	0	0	0	0	0	1	0	0	0	0	0
SNV:-17T,-15C,-14C	0	0	0	0	0	0	1	0	0	0	0	0
SNV:-4C,-2T,-1C,1A	0	0	0	0	0	0	1	0	0	0	0	0
SNV:-8T,2C,4A	0	0	0	0	0	0	1	0	0	0	0	0
SNV:-7G,-4C,-2G	0	0	0	0	0	0	1	0	0	0	0	0
SNV:-10T,1A	0	0	0	0	0	0	1	0	0	0	0	0
SNV:-11A,-8A,3C	0	0	0	0	0	0	1	0	0	0	0	0
SNV:-16A,-11A,-8A,-5A,3C	0	0	0	0	0	0	1	0	0	0	0	0
SNV:-14C,-4T	0	0	0	0	0	0	1	0	0	0	0	0
SNV:-16G,-1A	0	0	0	0	0	0	1	0	0	0	0	0
SNV:-9T,5A	0	0	0	0	0	0	1	0	0	0	0	0
SNV:-13A,-12G,-11A	0	0	0	0	0	0	1	0	0	0	0	0
SNV:-7C,4T	0	0	0	0	0	0	1	0	0	0	0	0
SNV:-12A,-9T,-3A,4A	0	0	0	0	0	0	1	0	0	0	0	0
SNV:-1T,1G	0	0	0	0	0	0	1	0	0	0	0	0
SNV:-7C,3C	0	0	0	0	0	0	1	0	0	0	0	0
SNV:-2T,1C,5C	0	0	0	0	0	0	1	0	0	0	0	0
SNV:-15C,-13T	0	0	0	0	0	0	1	0	0	0	0	0
SNV:-13A,-2C,-1T	0	0	0	0	0	0	1	0	0	0	0	0
SNV:-13A,-4T,-1T	0	0	0	0	0	0	1	0	0	0	0	0
SNV:-4T,4T	0	0	0	0	0	0	1	0	0	0	0	0
SNV:-14C,-4C	0	0	0	0	0	0	1	0	0	0	0	0
SNV:-17A,-3G,2T	0	0	0	0	0	0	1	0	0	0	0	0
SNV:-16G,-15G,-9G,-5A,3C	0	0	0	0	0	0	1	0	0	0	0	0
SNV:-14C,-9T,-3G,2T	0	0	0	0	0	0	1	0	0	0	0	0
SNV:-13T,-9C	0	0	0	0	0	0	1	0	0	0	0	0
SNV:-16A,-5A,-4C,-1C	0	0	0	0	0	0	1	0	0	0	0	0
SNV:-12T,4A	0	0	0	0	0	0	1	0	0	0	0	0
SNV:-15G,-14C,-13A,-9G,-4A,-2C,1G	0	0	0	0	0	0	1	0	0	0	0	0
SNV:-16G,-5A,3C	0	0	0	0	0	0	1	0	0	0	0	0
SNV:3T,4T	0	0	0	0	0	0	1	0	0	0	0	0
SNV:-16G,-12A,-11A,-9C,-7C	0	0	0	0	0	0	1	0	0	0	0	0
SNV:-14T,1A	0	0	0	0	0	0	1	0	0	0	0	0
SNV:-11G,-2G	0	0	0	0	0	0	1	0	0	0	0	0
SNV:-13A,-4T,-3A,-2C,-1T,3C	0	0	0	0	0	0	1	0	0	0	0	0
SNV:-13A,-4T,-2C,-1T,1G	0	0	0	0	0	0	1	0	0	0	0	0
SNV:-9T,-8T,-4C,-2T	0	0	0	0	0	0	1	0	0	0	0	0
SNV:-7T,-6A	0	0	0	0	0	0	1	0	0	0	0	0
SNV:-7C,1G	0	0	0	0	0	0	1	0	0	0	0	0
SNV:-8A,5C	0	0	0	0	0	0	0	1	0	0	0	0
SNV:-16A,-15G,-14T,-4T,-1T	0	0	0	0	0	0	0	1	0	0	0	0
SNV:-6T,-5T,-1T	0	0	0	0	0	0	0	1	0	0	0	0
SNV:-5T,-1T,2G	0	0	0	0	0	0	0	1	0	0	0	0
SNV:-14A,-9C,-5C,-4A,-2C,-1T	0	0	0	0	0	0	0	1	0	0	0	0
SNV:-12A,2T	0	0	0	0	0	0	0	1	0	0	0	0
SNV:-13A,-12A,-5T,-4T,-2C,-1T,2C	0	0	0	0	0	0	0	1	0	0	0	0
SNV:-16G,-5T,-4T,-1T,2C	0	0	0	0	0	0	0	1	0	0	0	0
SNV:-16G,-15G,1G	0	0	0	0	0	0	0	1	0	0	0	0
SNV:-9C,-7G,-1C	0	0	0	0	0	0	0	1	0	0	0	0
SNV:-15C,5A	0	0	0	0	0	0	0	1	0	0	0	0
SNV:-15C,-2C	0	0	0	0	0	0	0	1	0	0	0	0
SNV:-11A,-1T,1C	0	0	0	0	0	0	0	1	0	0	0	0
SNV:-14A,-8T,-3A,4A,6T	0	0	0	0	0	0	0	1	0	0	0	0
SNV:-17A,-16G,-12A,1G,2C	0	0	0	0	0	0	0	1	0	0	0	0
SNV:-16G,2C	0	0	0	0	0	0	0	1	0	0	0	0
SNV:-7C,-5C,6C	0	0	0	0	0	0	0	1	0	0	0	0
SNV:-7C,-5T,6T	0	0	0	0	0	0	0	1	0	0	0	0
SNV:-14T,-4C,-3T,-2T,-1T,1A	0	0	0	0	0	0	0	1	0	0	0	0
SNV:-6T,-2C	0	0	0	0	0	0	0	1	0	0	0	0
SNV:-9G,-2C	0	0	0	0	0	0	0	1	0	0	0	0
SNV:-8G,-5A,-1C,1A,5A	0	0	0	0	0	0	0	1	0	0	0	0
SNV:-12A,4G	0	0	0	0	0	0	0	1	0	0	0	0
SNV:-11A,6A	0	0	0	0	0	0	0	1	0	0	0	0
SNV:-9T,-1A	0	0	0	0	0	0	0	1	0	0	0	0
SNV:-16G,-12A,-9T,5A	0	0	0	0	0	0	0	1	0	0	0	0
SNV:-15C,-6T	0	0	0	0	0	0	0	1	0	0	0	0
SNV:-6T,-4A,-2C	0	0	0	0	0	0	0	1	0	0	0	0
SNV:-6T,-5T	0	0	0	0	0	0	0	1	0	0	0	0
SNV:-9G,-5A,-3G,5A	0	0	0	0	0	0	0	1	0	0	0	0
SNV:-12A,-2G,1G	0	0	0	0	0	0	0	1	0	0	0	0
SNV:-9C,4T	0	0	0	0	0	0	0	1	0	0	0	0
SNV:4T,6T	0	0	0	0	0	0	0	1	0	0	0	0
SNV:-4T,3C,4T	0	0	0	0	0	0	0	1	0	0	0	0
SNV:-6T,-5C,-4T,-1T	0	0	0	0	0	0	0	1	0	0	0	0
SNV:-4T,1G	0	0	0	0	0	0	0	1	0	0	0	0
SNV:-4C,1G,2C	0	0	0	0	0	0	0	1	0	0	0	0
SNV:-4T,1G,2C	0	0	0	0	0	0	0	1	0	0	0	0
SNV:-5A,6A	0	0	0	0	0	0	0	1	0	0	0	0
SNV:-13G,-4A,-3G,1A	0	0	0	0	0	0	0	1	0	0	0	0
SNV:-10T,2C	0	0	0	0	0	0	0	1	0	0	0	0
SNV:-14T,-8G	0	0	0	0	0	0	0	1	0	0	0	0
SNV:-16A,-2C,-1C,2C	0	0	0	0	0	0	0	1	0	0	0	0
SNV:-17A,-16G,-15G,-13A,-12A,-3A,1G	0	0	0	0	0	0	0	1	0	0	0	0
SNV:-4C,-1C,3C,4A	0	0	0	0	0	0	0	1	0	0	0	0
SNV:-13A,-11A,-4A,2T,3C,4A	0	0	0	0	0	0	0	1	0	0	0	0
SNV:-2T,-1C,2C	0	0	0	0	0	0	0	0	1	0	0	0
SNV:-7C,-6A	0	0	0	0	0	0	0	0	1	0	0	0
SNV:-10A,-9C,-1T	0	0	0	0	0	0	0	0	1	0	0	0
SNV:-17T,-15G,-1A,1A	0	0	0	0	0	0	0	0	1	0	0	0
SNV:-16G,-1C,1A	0	0	0	0	0	0	0	0	1	0	0	0
SNV:-7G,-1C	0	0	0	0	0	0	0	0	1	0	0	0
SNV:-16C,-6C	0	0	0	0	0	0	0	0	1	0	0	0
SNV:-6A,-5A	0	0	0	0	0	0	0	0	1	0	0	0
SNV:1A,2T	0	0	0	0	0	0	0	0	1	0	0	0
SNV:-10T,-7G,-4C	0	0	0	0	0	0	0	0	1	0	0	0
SNV:-6A,5A,6A	0	0	0	0	0	0	0	0	1	0	0	0
SNV:1C,3G,4G	0	0	0	0	0	0	0	0	1	0	0	0
SNV:-8T,-1A	0	0	0	0	0	0	0	0	1	0	0	0
SNV:-4T,-2T,-1C,1C,2T	0	0	0	0	0	0	0	0	1	0	0	0
SNV:-11A,2G	0	0	0	0	0	0	0	0	1	0	0	0
SNV:-14C,-13A,-7C	0	0	0	0	0	0	0	0	1	0	0	0
SNV:-12A,-11A	0	0	0	0	0	0	0	0	1	0	0	0
SNV:-16C,-6A	0	0	0	0	0	0	0	0	1	0	0	0
SNV:-17A,-16G,-5T,-3A,1G,2C	0	0	0	0	0	0	0	0	1	0	0	0
SNV:-12A,-3A,1G	0	0	0	0	0	0	0	0	1	0	0	0
SNV:-17A,-16G,-15G,-3A,1G,2C	0	0	0	0	0	0	0	0	1	0	0	0
SNV:-9T,-6A	0	0	0	0	0	0	0	0	1	0	0	0
SNV:-2C,5C	0	0	0	0	0	0	0	0	1	0	0	0
SNV:-3G,5C	0	0	0	0	0	0	0	0	1	0	0	0
SNV:-9C,-2C,3C	0	0	0	0	0	0	0	0	1	0	0	0
SNV:-8A,-1C,1C	0	0	0	0	0	0	0	0	1	0	0	0
SNV:-7C,-1C,1C	0	0	0	0	0	0	0	0	1	0	0	0
SNV:-4C,5T	0	0	0	0	0	0	0	0	1	0	0	0
SNV:-16A,6T	0	0	0	0	0	0	0	0	1	0	0	0
SNV:-17A,-16G,-13G	0	0	0	0	0	0	0	0	1	0	0	0
SNV:-8G,-5T	0	0	0	0	0	0	0	0	1	0	0	0
SNV:-13A,-10T,1A	0	0	0	0	0	0	0	0	1	0	0	0
SNV:-16A,-10T,-9T,4A,5A	0	0	0	0	0	0	0	0	1	0	0	0
SNV:-11A,2T	0	0	0	0	0	0	0	0	1	0	0	0
SNV:-4T,-3A,-2C,-1T	0	0	0	0	0	0	0	0	1	0	0	0
SNV:-12A,-2G	0	0	0	0	0	0	0	0	1	0	0	0
SNV:-14C,-1T,4A,6T	0	0	0	0	0	0	0	0	1	0	0	0
SNV:-12A,-4A,6A	0	0	0	0	0	0	0	0	1	0	0	0
SNV:-12A,-1C,1C,3G	0	0	0	0	0	0	0	0	1	0	0	0
SNV:-15G,1A	0	0	0	0	0	0	0	0	1	0	0	0
SNV:-2G,1A	0	0	0	0	0	0	0	0	1	0	0	0
SNV:-16A,-12A,1A	0	0	0	0	0	0	0	0	1	0	0	0
SNV:-9C,-7C,-4T	0	0	0	0	0	0	0	0	0	1	0	0
SNV:-7T,-1T,1C,2C	0	0	0	0	0	0	0	0	0	1	0	0
SNV:-5C,5C	0	0	0	0	0	0	0	0	0	1	0	0
SNV:-9C,2C,3C	0	0	0	0	0	0	0	0	0	1	0	0
SNV:-5A,-1C,1A,5A	0	0	0	0	0	0	0	0	0	1	0	0
SNV:-14C,-13A,-5A,-4C,-2C,1C	0	0	0	0	0	0	0	0	0	1	0	0
SNV:-6T,-2C,1A,4T	0	0	0	0	0	0	0	0	0	1	0	0
SNV:-16A,-14A,-7C,-6T,1G	0	0	0	0	0	0	0	0	0	1	0	0
SNV:-12A,-8G,-7C,-2T	0	0	0	0	0	0	0	0	0	1	0	0
SNV:-5T,5T,6T	0	0	0	0	0	0	0	0	0	1	0	0
SNV:-2C,4A	0	0	0	0	0	0	0	0	0	1	0	0
SNV:-16C,-12A,-5C,1G	0	0	0	0	0	0	0	0	0	1	0	0
SNV:-6C,-5C,-4T	0	0	0	0	0	0	0	0	0	1	0	0
SNV:-2T,3C,5C,6C	0	0	0	0	0	0	0	0	0	1	0	0
SNV:-5A,-4T,-2C,-1A,1A,3C	0	0	0	0	0	0	0	0	0	1	0	0
SNV:-6T,-5T,3C	0	0	0	0	0	0	0	0	0	1	0	0
SNV:-16G,-15G,-12A,1G,2C	0	0	0	0	0	0	0	0	0	1	0	0
SNV:-15C,-3T	0	0	0	0	0	0	0	0	0	1	0	0
SNV:-14C,-2G,3C	0	0	0	0	0	0	0	0	0	1	0	0
SNV:-7T,-3G	0	0	0	0	0	0	0	0	0	1	0	0
SNV:-13A,-3G	0	0	0	0	0	0	0	0	0	1	0	0
SNV:-14T,-5C	0	0	0	0	0	0	0	0	0	1	0	0
SNV:-10T,1G	0	0	0	0	0	0	0	0	0	1	0	0
SNV:-9T,-3T	0	0	0	0	0	0	0	0	0	1	0	0
SNV:-16C,3C	0	0	0	0	0	0	0	0	0	1	0	0
SNV:-16G,-3A,1G,2G	0	0	0	0	0	0	0	0	0	1	0	0
SNV:-14C,-11T	0	0	0	0	0	0	0	0	0	1	0	0
SNV:-13T,-2C	0	0	0	0	0	0	0	0	0	1	0	0
SNV:-14T,1G,5C	0	0	0	0	0	0	0	0	0	1	0	0
SNV:-17A,-16G,-5T	0	0	0	0	0	0	0	0	0	1	0	0
SNV:-12A,-6A	0	0	0	0	0	0	0	0	0	1	0	0
SNV:-4T,-3A,-2G,1A	0	0	0	0	0	0	0	0	0	1	0	0
SNV:-17A,-6T,-4T	0	0	0	0	0	0	0	0	0	1	0	0
SNV:-2C,-1T,1C	0	0	0	0	0	0	0	0	0	1	0	0
SNV:-14A,-9T,-6C,-5C,-1T	0	0	0	0	0	0	0	0	0	1	0	0
SNV:-16G,-4T,-2C,-1T	0	0	0	0	0	0	0	0	0	1	0	0
SNV:-16G,-15G,-5T,-4T,1G	0	0	0	0	0	0	0	0	0	1	0	0
SNV:-14C,1G	0	0	0	0	0	0	0	0	0	1	0	0
SNV:-14A,-7T,-5C,-2C,-1T	0	0	0	0	0	0	0	0	0	1	0	0
SNV:-7G,-4C,-2G,6C	0	0	0	0	0	0	0	0	0	1	0	0
SNV:-9G,3T	0	0	0	0	0	0	0	0	0	1	0	0
SNV:-12T,-8A,4A	0	0	0	0	0	0	0	0	0	1	0	0
SNV:-4A,-3G,-1C,1C,2T,3G	0	0	0	0	0	0	0	0	0	1	0	0
SNV:-14T,-2C	0	0	0	0	0	0	0	0	0	1	0	0
SNV:-9C,-4A	0	0	0	0	0	0	0	0	0	1	0	0
SNV:-10T,-3G,-1C	0	0	0	0	0	0	0	0	0	1	0	0
SNV:-14T,-3T,-2G,2T	0	0	0	0	0	0	0	0	0	1	0	0
SNV:-14C,-9G,-5A	0	0	0	0	0	0	0	0	0	0	1	0
SNV:-10T,-9G,-1C,5A	0	0	0	0	0	0	0	0	0	0	1	0
SNV:-16G,-12A,1A	0	0	0	0	0	0	0	0	0	0	1	0
SNV:-15A,-9G,-5A	0	0	0	0	0	0	0	0	0	0	1	0
SNV:-12A,-9C,-8T,-7C,-5A	0	0	0	0	0	0	0	0	0	0	1	0
SNV:-14C,-5A,6C	0	0	0	0	0	0	0	0	0	0	1	0
SNV:-16G,-5C	0	0	0	0	0	0	0	0	0	0	1	0
SNV:-14T,-9C,-7C,-4T	0	0	0	0	0	0	0	0	0	0	1	0
SNV:-4C,-2C	0	0	0	0	0	0	0	0	0	0	1	0
SNV:4T,5T	0	0	0	0	0	0	0	0	0	0	1	0
SNV:-14T,5C	0	0	0	0	0	0	0	0	0	0	1	0
SNV:-16A,-9T	0	0	0	0	0	0	0	0	0	0	1	0
SNV:-5A,2T	0	0	0	0	0	0	0	0	0	0	1	0
SNV:-17A,-11A,5A	0	0	0	0	0	0	0	0	0	0	1	0
SNV:-7T,-6C	0	0	0	0	0	0	0	0	0	0	1	0
SNV:-11T,5A	0	0	0	0	0	0	0	0	0	0	1	0
SNV:-16G,-13T,-2C,-1T,1C,3G	0	0	0	0	0	0	0	0	0	0	1	0
SNV:-7C,-5A	0	0	0	0	0	0	0	0	0	0	1	0
SNV:-17A,-16G,-9G,1A,6T	0	0	0	0	0	0	0	0	0	0	1	0
SNV:-5C,1G	0	0	0	0	0	0	0	0	0	0	1	0
SNV:-10T,-9T,-1C,5A,6T	0	0	0	0	0	0	0	0	0	0	1	0
SNV:-9G,-1C,5A	0	0	0	0	0	0	0	0	0	0	1	0
SNV:-14C,1G,6T	0	0	0	0	0	0	0	0	0	0	1	0
SNV:-10A,-5A,-2C	0	0	0	0	0	0	0	0	0	0	1	0
SNV:-5T,1G,2C	0	0	0	0	0	0	0	0	0	0	1	0
SNV:-16C,-14T,3G	0	0	0	0	0	0	0	0	0	0	1	0
SNV:-9G,-5C	0	0	0	0	0	0	0	0	0	0	1	0
SNV:-17G,-9G,-4A,1A	0	0	0	0	0	0	0	0	0	0	1	0
SNV:-17T,-9G,-3G,2G,3C,5A	0	0	0	0	0	0	0	0	0	0	1	0
SNV:-10G,-9G,1A	0	0	0	0	0	0	0	0	0	0	1	0
SNV:-16A,-10G,-5A,-3G,-2G,1A,6C	0	0	0	0	0	0	0	0	0	0	1	0
SNV:-9G,1A,6T	0	0	0	0	0	0	0	0	0	0	1	0
SNV:-13A,-2G	0	0	0	0	0	0	0	0	0	0	1	0
SNV:-9T,-3G	0	0	0	0	0	0	0	0	0	0	1	0
SNV:-14T,5T	0	0	0	0	0	0	0	0	0	0	1	0
SNV:-2C,3C,4T	0	0	0	0	0	0	0	0	0	0	1	0
SNV:-11A,5A	0	0	0	0	0	0	0	0	0	0	1	0
SNV:-9T,-6C	0	0	0	0	0	0	0	0	0	0	1	0
SNV:-13A,-9T,-3A	0	0	0	0	0	0	0	0	0	0	1	0
SNV:-14T,-4A	0	0	0	0	0	0	0	0	0	0	1	0
SNV:-11A,-5A,3C,6T	0	0	0	0	0	0	0	0	0	0	1	0
SNV:-13A,-3G,1A	0	0	0	0	0	0	0	0	0	0	1	0
SNV:-5C,-4T,-2C,-1T,2C	0	0	0	0	0	0	0	0	0	0	1	0
SNV:-17A,-13A,-9G,1A	0	0	0	0	0	0	0	0	0	0	1	0
SNV:-12A,-9G	0	0	0	0	0	0	0	0	0	0	1	0
SNV:-9G,-5A,-1C	0	0	0	0	0	0	0	0	0	0	1	0
SNV:-17A,-16G,-1C	0	0	0	0	0	0	0	0	0	0	1	0
SNV:-12A,-9T,3G,4T	0	0	0	0	0	0	0	0	0	0	1	0
SNV:-17A,-15G,-3A,1G,2C	0	0	0	0	0	0	0	0	0	0	1	0
SNV:-16C,-14T	0	0	0	0	0	0	0	0	0	0	1	0
SNV:-7T,-1A,6C	0	0	0	0	0	0	0	0	0	0	1	0
SNV:-15G,-9C,-7C,-6T,3C,4A	0	0	0	0	0	0	0	0	0	0	1	0
SNV:-13A,-11A,-8A	0	0	0	0	0	0	0	0	0	0	1	0
SNV:-16A,-14C,-10A,-7T	0	0	0	0	0	0	0	0	0	0	1	0
SNV:-16G,-2C	0	0	0	0	0	0	0	0	0	0	1	0
SNV:-17A,1G	0	0	0	0	0	0	0	0	0	0	1	0
SNV:-16G,-15G,1A,3C	0	0	0	0	0	0	0	0	0	0	1	0
SNV:-5A,-1A,1A	0	0	0	0	0	0	0	0	0	0	1	0
SNV:-9T,-7T,-5C,-4T,5C	0	0	0	0	0	0	0	0	0	0	1	0
SNV:-14C,-9C,1C	0	0	0	0	0	0	0	0	0	0	1	0
SNV:-9C,-1T	0	0	0	0	0	0	0	0	0	0	1	0
SNV:-16G,-9G,-1C,1A,3C	0	0	0	0	0	0	0	0	0	0	1	0
SNV:-11A,-9G	0	0	0	0	0	0	0	0	0	0	1	0
SNV:-16G,-9G,-7G	0	0	0	0	0	0	0	0	0	0	1	0
SNV:-10G,-5A,6A	0	0	0	0	0	0	0	0	0	0	1	0
SNV:-17A,-12A,1A	0	0	0	0	0	0	0	0	0	0	1	0
SNV:3C,5A	0	0	0	0	0	0	0	0	0	0	1	0
SNV:-4C,-3G,-2T,-1T,6T	0	0	0	0	0	0	0	0	0	0	1	0
SNV:-17T,-9G,3C	0	0	0	0	0	0	0	0	0	0	1	0
SNV:-5C,6A	0	0	0	0	0	0	0	0	0	0	1	0
SNV:-16G,-15G,-11A,-10T,-5A	0	0	0	0	0	0	0	0	0	0	1	0
SNV:-13A,-11A,-10A,3C	0	0	0	0	0	0	0	0	0	0	1	0
SNV:-17A,-16G,-12T,1A	0	0	0	0	0	0	0	0	0	0	1	0
SNV:-4T,-1T,2T	0	0	0	0	0	0	0	0	0	0	1	0
SNV:-17A,-10A,1A	0	0	0	0	0	0	0	0	0	0	1	0
SNV:-17A,-16G,-13A,-12A,-5T,2C	0	0	0	0	0	0	0	0	0	0	1	0
SNV:-16G,-9G,1A	0	0	0	0	0	0	0	0	0	0	1	0
SNV:-11T,-8T,-6T,-4A,5T	0	0	0	0	0	0	0	0	0	0	1	0
SNV:-16G,-9G,-1C	0	0	0	0	0	0	0	0	0	0	1	0
SNV:-5C,3T	0	0	0	0	0	0	0	0	0	0	1	0
SNV:-16A,-6C,-3G,-2G	0	0	0	0	0	0	0	0	0	0	1	0
SNV:-5A,-3G,5A	0	0	0	0	0	0	0	0	0	0	1	0
SNV:-10T,2T	0	0	0	0	0	0	0	0	0	0	1	0
SNV:-9G,-5A,-3G,1A,3C	0	0	0	0	0	0	0	0	0	0	1	0
SNV:-7T,-4T,-2C	0	0	0	0	0	0	0	0	0	0	1	0
SNV:-6C,-5T,-4A,5C	0	0	0	0	0	0	0	0	0	0	1	0
SNV:1G,5A	0	0	0	0	0	0	0	0	0	0	1	0
SNV:-7T,-4C	0	0	0	0	0	0	0	0	0	0	1	0
SNV:-12G,-7C,6C	0	0	0	0	0	0	0	0	0	0	1	0
SNV:-13A,-12G	0	0	0	0	0	0	0	0	0	0	1	0
SNV:-12T,1G	0	0	0	0	0	0	0	0	0	0	1	0
SNV:-17G,-16A,-10G,-9G,-6A,5C	0	0	0	0	0	0	0	0	0	0	1	0
SNV:-12G,-11A,-10G	0	0	0	0	0	0	0	0	0	0	1	0
SNV:-14T,-9T,-3T,-2T,2T	0	0	0	0	0	0	0	0	0	0	1	0
SNV:-17A,-16G,1A	0	0	0	0	0	0	0	0	0	0	1	0
SNV:-7C,2T	0	0	0	0	0	0	0	0	0	0	1	0
SNV:-14C,-12G	0	0	0	0	0	0	0	0	0	0	1	0
SNV:-16G,-9G,-1T	0	0	0	0	0	0	0	0	0	0	1	0
SNV:-15G,-14C,-9G,-1T,1A	0	0	0	0	0	0	0	0	0	0	1	0
SNV:-16G,-7G	0	0	0	0	0	0	0	0	0	0	1	0
SNV:-15A,-11A,-9T,-8G,-5A,6T	0	0	0	0	0	0	0	0	0	0	1	0
SNV:-4A,-3A,1A	0	0	0	0	0	0	0	0	0	0	1	0
SNV:-5A,-4A,-3A,-2C,-1A,3T	0	0	0	0	0	0	0	0	0	0	1	0
SNV:-6T,-3A	0	0	0	0	0	0	0	0	0	0	1	0
SNV:-17T,-5A,-3G,-2C	0	0	0	0	0	0	0	0	0	0	1	0
SNV:-13A,-2T	0	0	0	0	0	0	0	0	0	0	1	0
SNV:-5A,-3G,4A	0	0	0	0	0	0	0	0	0	0	1	0
SNV:-9G,-5A,3C,5A	0	0	0	0	0	0	0	0	0	0	1	0
SNV:-14A,-5A	0	0	0	0	0	0	0	0	0	0	1	0
SNV:-13A,-12G,-7C	0	0	0	0	0	0	0	0	0	0	1	0
SNV:-9G,-2G,-1A,5T	0	0	0	0	0	0	0	0	0	0	1	0
SNV:-5C,2C	0	0	0	0	0	0	0	0	0	0	1	0
SNV:-6A,2C	0	0	0	0	0	0	0	0	0	0	1	0
SNV:-17A,-10T	0	0	0	0	0	0	0	0	0	0	1	0
SNV:-16G,-11A,-9G,-5A,-1C,5A	0	0	0	0	0	0	0	0	0	0	1	0
SNV:-4A,-1T,3T	0	0	0	0	0	0	0	0	0	0	1	0
SNV:-14C,-10T,-9T,-7C,-5A	0	0	0	0	0	0	0	0	0	0	1	0
SNV:-7C,-2C	0	0	0	0	0	0	0	0	0	0	1	0
SNV:-9C,-8G,5A	0	0	0	0	0	0	0	0	0	0	1	0
SNV:-11T,-8G,-1C,1A,3G,4G	0	0	0	0	0	0	0	0	0	0	1	0
SNV:-10A,1G,3C	0	0	0	0	0	0	0	0	0	0	1	0
SNV:-14C,-10T,-7C,-6C	0	0	0	0	0	0	0	0	0	0	1	0
SNV:-17A,6T	0	0	0	0	0	0	0	0	0	0	1	0
SNV:-7G,-6C,4A	0	0	0	0	0	0	0	0	0	0	1	0
SNV:-2C,1A,2T	0	0	0	0	0	0	0	0	0	0	1	0
SNV:-10T,-6C,-3G	0	0	0	0	0	0	0	0	0	0	1	0
SNV:-2T,-1T,3T	0	0	0	0	0	0	0	0	0	0	1	0
SNV:-6T,5A	0	0	0	0	0	0	0	0	0	0	1	0
SNV:-17T,3C	0	0	0	0	0	0	0	0	0	0	1	0
SNV:-13A,-10T,6C	0	0	0	0	0	0	0	0	0	0	1	0
SNV:-15G,1A,3C	0	0	0	0	0	0	0	0	0	0	1	0
SNV:-5T,-2T,1A,4A	0	0	0	0	0	0	0	0	0	0	1	0
SNV:-14C,-5A,-3G	0	0	0	0	0	0	0	0	0	0	1	0
SNV:-17A,-4T,-3G	0	0	0	0	0	0	0	0	0	0	1	0
SNV:-17A,-16G,-12A,1A,5A	0	0	0	0	0	0	0	0	0	0	1	0
SNV:-15G,-7G	0	0	0	0	0	0	0	0	0	0	1	0
SNV:-3A,5A	0	0	0	0	0	0	0	0	0	0	1	0
SNV:-12T,-8A	0	0	0	0	0	0	0	0	0	0	1	0
SNV:-5A,-1A	0	0	0	0	0	0	0	0	0	0	1	0
SNV:-14T,-12A,-3A,1G	0	0	0	0	0	0	0	0	0	0	1	0
SNV:-5T,1G	0	0	0	0	0	0	0	0	0	0	1	0
SNV:-7C,-5T,-1C	0	0	0	0	0	0	0	0	0	0	1	0
SNV:-13A,-9T,-7T,-5C,-2C	0	0	0	0	0	0	0	0	0	0	1	0
SNV:-15G,-8A,3C	0	0	0	0	0	0	0	0	0	0	1	0
SNV:-9T,-6C,6C	0	0	0	0	0	0	0	0	0	0	1	0
SNV:-3G,1G	0	0	0	0	0	0	0	0	0	0	1	0
SNV:-7T,-5C,-2C,-1T,2C	0	0	0	0	0	0	0	0	0	0	1	0
SNV:-8A,-5A,-1A	0	0	0	0	0	0	0	0	0	0	1	0
SNV:1C,6C	0	0	0	0	0	0	0	0	0	0	1	0
SNV:-16G,3C,5A	0	0	0	0	0	0	0	0	0	0	1	0
SNV:-16G,-10T,-3G,-1C,1A	0	0	0	0	0	0	0	0	0	0	1	0
SNV:1C,3T	0	0	0	0	0	0	0	0	0	0	1	0
SNV:-17T,-14A,3T,4A	0	0	0	0	0	0	0	0	0	0	1	0
SNV:-17A,-10T,-3G	0	0	0	0	0	0	0	0	0	0	1	0
SNV:-5A,1A,2T	0	0	0	0	0	0	0	0	0	0	1	0
SNV:-9G,-3A	0	0	0	0	0	0	0	0	0	0	1	0
SNV:-13A,-12G,-11A,-5A,2T,3C	0	0	0	0	0	0	0	0	0	0	1	0
SNV:-17A,-13A,1A	0	0	0	0	0	0	0	0	0	0	1	0
SNV:-1C,2T,6A	0	0	0	0	0	0	0	0	0	0	1	0
SNV:-5C,-2C,-1A,5T	0	0	0	0	0	0	0	0	0	0	1	0
SNV:-9T,2C,6C	0	0	0	0	0	0	0	0	0	0	1	0
SNV:-17A,-13G,-10T,5T	0	0	0	0	0	0	0	0	0	0	1	0
SNV:-17A,1A,3C	0	0	0	0	0	0	0	0	0	0	1	0
SNV:-11T,2T	0	0	0	0	0	0	0	0	0	0	1	0
SNV:-17A,-16G,-12A,-5T,-3A,-2C,-1T,2C	0	0	0	0	0	0	0	0	0	0	1	0
SNV:-17A,-9G,-1A	0	0	0	0	0	0	0	0	0	0	1	0
SNV:-14T,-13A,-11T,-6C,-4T	0	0	0	0	0	0	0	0	0	0	1	0
SNV:-14T,-6T,-4C,2C	0	0	0	0	0	0	0	0	0	0	1	0
SNV:-6T,-4T,1G,2C	0	0	0	0	0	0	0	0	0	0	1	0
SNV:-15A,3G	0	0	0	0	0	0	0	0	0	0	1	0
SNV:-16G,1A,3C	0	0	0	0	0	0	0	0	0	0	1	0
SNV:-16A,-9G,1A	0	0	0	0	0	0	0	0	0	0	1	0
SNV:-14C,3C	0	0	0	0	0	0	0	0	0	0	1	0
SNV:-13A,5A	0	0	0	0	0	0	0	0	0	0	1	0
SNV:-16G,-9G,-5A,3C	0	0	0	0	0	0	0	0	0	0	1	0
SNV:-4T,1C	0	0	0	0	0	0	0	0	0	0	1	0
SNV:-1T,1A	0	0	0	0	0	0	0	0	0	0	1	0
SNV:-6A,5A	0	0	0	0	0	0	0	0	0	0	1	0
SNV:-13A,-7C,-3G	0	0	0	0	0	0	0	0	0	0	1	0
SNV:-9G,-3G,-1C	0	0	0	0	0	0	0	0	0	0	1	0
SNV:-7C,-3G,1G	0	0	0	0	0	0	0	0	0	0	1	0
SNV:-14A,-9C,-8G,-7T,-5C	0	0	0	0	0	0	0	0	0	0	1	0
SNV:-4C,-1C	0	0	0	0	0	0	0	0	0	0	1	0
SNV:-13A,-5A,2T	0	0	0	0	0	0	0	0	0	0	1	0
SNV:-16A,-10T,1A	0	0	0	0	0	0	0	0	0	0	1	0
SNV:3C,4A	0	0	0	0	0	0	0	0	0	0	1	0
SNV:-6T,2C	0	0	0	0	0	0	0	0	0	0	1	0
SNV:-12G,-9T,-2G,-1C	0	0	0	0	0	0	0	0	0	0	1	0
SNV:-5A,1A,6T	0	0	0	0	0	0	0	0	0	0	1	0
SNV:-17T,1A	0	0	0	0	0	0	0	0	0	0	1	0
SNV:-17T,-11A,1A	0	0	0	0	0	0	0	0	0	0	1	0
SNV:-14T,-4A,-2T	0	0	0	0	0	0	0	0	0	0	1	0
SNV:-9T,2G	0	0	0	0	0	0	0	0	0	0	1	0
SNV:-16G,-5A,3C,5A	0	0	0	0	0	0	0	0	0	0	1	0
SNV:-17A,1G,3C,4A	0	0	0	0	0	0	0	0	0	0	1	0
SNV:-6T,4A	0	0	0	0	0	0	0	0	0	0	1	0
SNV:3G,4G	0	0	0	0	0	0	0	0	0	0	1	0
SNV:-9T,-7G,-5C,-3T,-2C	0	0	0	0	0	0	0	0	0	0	1	0
SNV:-14C,-13A,-7C,-5A,4A	0	0	0	0	0	0	0	0	0	0	1	0
SNV:2C,5A	0	0	0	0	0	0	0	0	0	0	1	0
SNV:-16A,-5A,5A	0	0	0	0	0	0	0	0	0	0	1	0
SNV:-14C,-13A,-4T,-2C,-1T	0	0	0	0	0	0	0	0	0	0	1	0
SNV:-14C,-9G,-5A,2C	0	0	0	0	0	0	0	0	0	0	1	0
SNV:-7G,-5A,-3G,-1C,3C	0	0	0	0	0	0	0	0	0	0	1	0
SNV:-16G,-9G,3C	0	0	0	0	0	0	0	0	0	0	1	0
SNV:-11G,-5C	0	0	0	0	0	0	0	0	0	0	1	0
SNV:-11G,-10T,-6C,-5C,-2G	0	0	0	0	0	0	0	0	0	0	1	0
SNV:1A,3C,5C	0	0	0	0	0	0	0	0	0	0	1	0
SNV:2C,6A	0	0	0	0	0	0	0	0	0	0	1	0
SNV:-16G,-5A,-3G	0	0	0	0	0	0	0	0	0	0	1	0
SNV:-15C,6T	0	0	0	0	0	0	0	0	0	0	1	0
SNV:-16G,-1T,2G,5A	0	0	0	0	0	0	0	0	0	0	1	0
SNV:-11A,-5A,5A	0	0	0	0	0	0	0	0	0	0	1	0
SNV:-8G,-1T	0	0	0	0	0	0	0	0	0	0	1	0
SNV:-12T,-10G,-6A	0	0	0	0	0	0	0	0	0	0	1	0
SNV:-9G,-1C,3C	0	0	0	0	0	0	0	0	0	0	1	0
SNV:-11G,-9T,-6C	0	0	0	0	0	0	0	0	0	0	1	0
SNV:-16A,-13A,-6C	0	0	0	0	0	0	0	0	0	0	1	0
SNV:-16G,-9G,-5A,-3G,1A	0	0	0	0	0	0	0	0	0	0	1	0
SNV:-16A,-10T,-9G,-5A	0	0	0	0	0	0	0	0	0	0	1	0
SNV:-16G,3C,6T	0	0	0	0	0	0	0	0	0	0	1	0
SNV:-13G,-12T	0	0	0	0	0	0	0	0	0	0	1	0
SNV:1G,3C,4A	0	0	0	0	0	0	0	0	0	0	1	0
SNV:-6A,-5C,-4C	0	0	0	0	0	0	0	0	0	0	1	0
SNV:-1A,3C,4T	0	0	0	0	0	0	0	0	0	0	1	0
SNV:-12A,-10T	0	0	0	0	0	0	0	0	0	0	1	0
SNV:1A,4G	0	0	0	0	0	0	0	0	0	0	1	0
SNV:-5A,-4C	0	0	0	0	0	0	0	0	0	0	1	0
SNV:-17A,-16G,-13A,-12A,1A	0	0	0	0	0	0	0	0	0	0	0	1
SNV:3C,4A,5A	0	0	0	0	0	0	0	0	0	0	0	1
SNV:-6C,-5T,-2T,3C	0	0	0	0	0	0	0	0	0	0	0	1
SNV:-7C,-5A,5A	0	0	0	0	0	0	0	0	0	0	0	1
SNV:-10A,-1C,1C	0	0	0	0	0	0	0	0	0	0	0	1
SNV:-14C,-13A,-9T,1A,2T	0	0	0	0	0	0	0	0	0	0	0	1
SNV:-1A,2T	0	0	0	0	0	0	0	0	0	0	0	1
SNV:-2T,-1T,1A	0	0	0	0	0	0	0	0	0	0	0	1
SNV:-3A,1A,2C	0	0	0	0	0	0	0	0	0	0	0	1
SNV:-6A,-1C,1G	0	0	0	0	0	0	0	0	0	0	0	1
SNV:-7G,6C	0	0	0	0	0	0	0	0	0	0	0	1
SNV:-5A,-4T,3T	0	0	0	0	0	0	0	0	0	0	0	1
SNV:-4T,-2T,-1T,3C	0	0	0	0	0	0	0	0	0	0	0	1
SNV:-17A,1C	0	0	0	0	0	0	0	0	0	0	0	1
SNV:-2C,-1T,2C	0	0	0	0	0	0	0	0	0	0	0	1
SNV:-9C,-6T,-1T,1C,3G	0	0	0	0	0	0	0	0	0	0	0	1
SNV:-9G,-1A	0	0	0	0	0	0	0	0	0	0	0	1
SNV:-12T,-1C,1C	0	0	0	0	0	0	0	0	0	0	0	1
SNV:-12T,-5C,1G	0	0	0	0	0	0	0	0	0	0	0	1
SNV:-9T,-1C,1C	0	0	0	0	0	0	0	0	0	0	0	1
SNV:-4C,2T	0	0	0	0	0	0	0	0	0	0	0	1
SNV:-11A,-5A,5A,6A	0	0	0	0	0	0	0	0	0	0	0	1
SNV:-17A,-10A	0	0	0	0	0	0	0	0	0	0	0	1
SNV:-12A,-3G	0	0	0	0	0	0	0	0	0	0	0	1
SNV:-14C,-5T,-2C	0	0	0	0	0	0	0	0	0	0	0	1
SNV:-9C,-3T	0	0	0	0	0	0	0	0	0	0	0	1
SNV:-14C,-7C,-2G	0	0	0	0	0	0	0	0	0	0	0	1
SNV:-15A,-12A,-5A	0	0	0	0	0	0	0	0	0	0	0	1
SNV:4A,5A	0	0	0	0	0	0	0	0	0	0	0	1
SNV:-8T,-1C,1C	0	0	0	0	0	0	0	0	0	0	0	1
SNV:-17A,-14T	0	0	0	0	0	0	0	0	0	0	0	1
SNV:-13A,-4T,-2T,-1T,2G	0	0	0	0	0	0	0	0	0	0	0	1
SNV:-15G,-14C,-11T,-4A,-1C,4T	0	0	0	0	0	0	0	0	0	0	0	1
SNV:-13A,1G	0	0	0	0	0	0	0	0	0	0	0	1
SNV:-3A,6C	0	0	0	0	0	0	0	0	0	0	0	1
SNV:-16A,-3A	0	0	0	0	0	0	0	0	0	0	0	1
SNV:-16A,-13A,-5A	0	0	0	0	0	0	0	0	0	0	0	1
SNV:-6T,-4C,1G,2C	0	0	0	0	0	0	0	0	0	0	0	1
SNV:-12A,-9T,-5A,-4C	0	0	0	0	0	0	0	0	0	0	0	1
SNV:-9C,-7C,3C	0	0	0	0	0	0	0	0	0	0	0	1
SNV:-13A,-11A,2T,3C	0	0	0	0	0	0	0	0	0	0	0	1
SNV:-17A,-16A,1A	0	0	0	0	0	0	0	0	0	0	0	1
SNV:-14C,1A	0	0	0	0	0	0	0	0	0	0	0	1
SNV:-9T,-6C,-5T,6T	0	0	0	0	0	0	0	0	0	0	0	1
SNV:-13A,-4T,-3T,-1T,1A	0	0	0	0	0	0	0	0	0	0	0	1
SNV:-7T,-6A,-1C	0	0	0	0	0	0	0	0	0	0	0	1
SNV:-12A,-9T,-5A	0	0	0	0	0	0	0	0	0	0	0	1
SNV:-14A,-1C	0	0	0	0	0	0	0	0	0	0	0	1
-5:9D	2	868	667	3	720	982	3	715	412	0	597	398
1:1I	0	168	362	1	114	562	0	43	248	0	28	232
-1:1I	2	201	246	1	75	502	0	16	128	0	43	131
-1:8D	0	239	155	1	151	194	0	167	62	0	123	70
-2:2D	0	93	228	0	121	381	0	12	142	0	51	100
-1:1D	0	105	234	0	27	377	0	28	146	1	27	124
-7:7D	1	111	245	1	127	245	1	67	36	0	47	53
-15:15D	0	90	144	1	52	163	0	34	70	1	23	14
-6:6D	0	103	146	0	42	95	0	57	59	0	28	50
-14:13D	1	77	113	0	81	122	3	50	34	1	40	33
-2:2I	0	54	135	1	25	202	0	31	35	0	5	51
-9:9D	1	73	110	0	87	130	0	6	31	0	17	25
-13:1D	45	24	40	43	40	38	40	21	31	32	37	33
-12:12D	0	79	84	0	31	146	0	24	22	0	13	9
-10:10D	1	72	64	0	93	130	0	16	9	0	17	4
1:1D	3	72	67	1	38	82	2	28	38	3	9	42
-8:5D	1	57	54	15	39	134	1	0	32	0	6	44
-9:11D	0	64	95	0	41	57	0	23	11	0	30	34
-9:18D	0	82	41	0	28	61	1	32	14	0	32	21
-16:16D	0	29	57	0	46	115	0	10	14	0	25	15
-8:14D	0	63	25	0	31	50	0	11	45	0	28	24
-7:9D	0	62	32	0	28	47	0	30	5	0	42	17
1:2I	0	11	62	0	7	109	0	0	49	0	3	19
-8:8D	0	24	65	0	20	67	0	19	35	0	7	5
-10:16D	0	69	18	2	39	53	0	34	13	1	8	0
-6:10D	0	24	26	0	61	33	0	4	3	0	50	25
2:1D	20	30	9	12	22	23	19	20	12	20	11	18
-11:11D	0	21	71	0	24	34	0	28	0	0	15	18
-4:3D	0	27	37	0	17	53	1	0	30	0	0	44
-9:10D	0	49	32	0	13	38	0	11	29	0	9	2
-3:28I	0	0	37	0	0	60	1	0	27	0	0	58
-14:19D	0	39	25	0	14	24	0	17	7	0	16	11
-1:6D	0	30	41	0	22	15	0	15	7	0	5	12
-14:14D	0	20	25	0	16	40	0	10	5	0	9	19
-1:29I	0	0	37	0	0	55	0	0	14	0	0	35
-8:26D	0	12	36	0	31	36	0	7	11	0	6	0
-10:20D	0	38	0	0	25	18	0	13	0	0	11	11
-17:27D	0	18	11	0	9	51	0	13	0	0	3	11
-14:22D	0	54	13	0	15	26	0	2	0	0	2	0
-6:1D	6	7	12	2	6	31	4	5	8	12	14	4
-2:3D	0	6	29	0	20	22	0	0	6	0	10	15
-7:6D	0	20	19	0	5	24	0	13	0	0	9	15
-9:8D	0	7	31	0	0	35	0	21	8	0	0	3
1:8D	0	35	22	0	1	20	0	0	0	0	0	27
-11:26D	0	29	26	0	2	15	0	7	4	0	18	4
-4:8D	0	14	1	0	0	39	0	12	6	0	21	8
-10:11D	0	32	11	0	9	31	0	0	0	0	1	14
-2:1I	0	31	21	0	22	4	0	19	0	0	0	1
-1:10D	0	0	7	0	0	12	0	23	5	0	43	8
-13:15D	0	28	9	0	0	41	0	0	12	0	5	0
-1:2I	0	15	22	0	0	5	0	0	26	0	19	6
-13:16D	0	27	30	0	3	11	0	0	7	0	9	4
-7:8D	0	7	1	0	55	5	0	6	5	0	3	0
-7:16D	1	19	0	0	47	1	0	13	0	0	0	0
-10:28D	0	29	12	0	7	10	0	3	8	0	3	8
-12:27D	0	6	14	0	8	29	0	0	0	0	8	13
-14:18D	0	6	8	0	0	22	0	26	0	0	15	0
1:36I	0	4	10	0	0	5	0	0	7	0	0	47
1:40I	0	24	6	0	30	10	0	0	0	0	0	0
-2:4D	0	10	5	0	5	8	0	9	4	0	4	22
-1:12I	0	1	14	0	0	23	0	0	11	0	0	18
-1:2I,2:7D	0	21	15	0	0	0	0	14	0	0	0	16
-12:15D	0	20	14	0	3	14	0	10	0	0	4	0
-1:27I	0	0	15	0	0	35	0	0	14	0	0	1
-11:21D	0	13	2	0	12	9	0	18	9	0	0	1
-10:7D	0	19	18	1	16	2	0	4	0	0	3	0
1:3I	0	0	16	0	10	24	0	6	6	0	0	0
1:39I	0	28	6	0	11	14	0	0	0	0	0	0
-5:4D	0	0	8	0	14	13	0	0	3	0	0	21
-16:17D	0	11	6	0	0	31	0	0	0	0	0	9
-12:22D	0	14	0	0	13	25	0	1	0	0	0	4
-1:20I	0	0	12	0	0	29	0	0	0	0	0	16
-19:19D	0	15	9	0	8	24	0	0	0	0	0	0
-1:5D	0	27	0	0	0	19	0	6	3	0	0	0
1:2D	0	9	1	0	0	11	0	8	3	0	7	16
-3:6D	0	0	12	0	1	26	0	5	3	0	3	5
-13:23D	0	10	17	0	0	7	0	10	0	0	0	5
-6:1I,-1:8D	0	3	9	0	0	10	0	0	13	0	6	8
-11:14D	0	5	2	0	11	16	0	9	0	0	6	0
-3:13D	0	12	20	1	1	5	0	0	0	0	7	2
-1:1I,2:7D	0	21	10	0	0	4	0	0	0	0	3	7
-11:24D	0	4	0	0	2	0	0	22	0	0	10	7
-16:1D	4	3	1	3	4	1	8	1	3	1	2	13
-12:11D	0	15	8	0	4	11	0	0	0	0	6	0
-10:9D	0	0	26	0	0	18	0	0	0	0	0	0
-11:10D	0	0	2	0	8	21	0	0	13	0	0	0
1:42I	0	2	17	0	13	10	0	0	0	0	0	0
-6:4D	0	4	0	0	7	22	0	0	9	0	0	0
-1:4I	0	2	20	0	0	3	0	16	0	0	0	0
-1:16I	0	0	9	0	0	12	0	0	0	0	0	20
-4:3I	0	0	9	0	0	8	0	0	9	0	0	15
1:4D	0	9	18	0	2	11	0	0	0	0	0	0
-10:13D	0	9	2	0	15	7	0	0	0	0	6	1
-1:2D	0	0	9	0	8	9	0	0	1	0	0	13
-13:12D	0	12	9	0	7	10	0	0	0	0	1	0
-9:17D	0	12	9	0	14	1	0	0	3	0	0	0
-2:1D	0	0	18	0	0	11	0	4	0	0	0	6
-1:26I	0	0	7	0	0	7	0	0	11	0	0	14
1:11D	0	6	9	0	0	16	0	0	0	0	7	0
-1:39I	0	10	8	0	1	18	0	0	0	0	0	1
-21:21D	0	6	0	0	7	11	0	0	0	0	0	14
1:23D	0	0	28	0	0	0	0	0	0	0	0	10
3:7I	0	0	18	0	12	8	0	0	0	0	0	0
-1:13I	0	0	22	0	0	14	0	0	2	0	0	0
1:41I	0	21	4	0	0	9	0	0	0	0	0	3
-17:17D	0	9	7	0	7	13	0	0	0	0	1	0
-11:17D	0	8	7	0	3	6	0	9	4	0	0	0
-14:16D	0	9	12	0	6	0	0	4	0	0	6	0
-18:33D	0	15	4	0	0	18	0	0	0	0	0	0
-2:30I	0	0	7	0	0	9	0	0	14	0	0	7
-3:21I	0	0	0	0	0	20	0	0	14	0	0	3
1:44I	0	20	0	0	7	9	0	0	0	0	0	0
1:7D	0	4	17	0	1	4	0	0	10	0	0	0
1:3D	0	0	7	0	5	23	0	1	0	0	0	0
-2:11I	0	0	0	0	0	14	0	9	13	0	0	0
1:79I	0	5	17	0	0	0	0	0	0	0	0	13
-6:11D	0	13	3	0	6	12	0	0	0	0	0	1
1:17D	0	0	6	0	18	8	0	0	0	0	0	2
-13:11D	0	4	0	0	0	15	0	14	0	0	0	0
1:10D	0	2	4	0	15	6	0	0	0	0	6	0
-11:8D	0	7	2	0	7	8	0	5	0	0	4	0
1:63I	0	0	12	0	3	10	0	8	0	0	0	0
-1:19I	0	0	13	0	0	8	0	0	6	0	0	6
-12:18D	0	14	0	1	2	15	0	0	0	0	0	0
1:78I	0	8	9	0	8	7	0	0	0	0	0	0
-16:22D	0	16	0	0	15	1	0	0	0	0	0	0
-1:3I	0	1	4	0	0	10	0	17	0	0	0	0
-14:21D	0	8	0	0	0	8	0	16	0	0	0	0
-4:34D	0	14	0	0	6	4	0	0	0	0	0	8
-10:18D	0	8	6	0	0	10	0	0	0	0	0	8
1:4I	0	2	9	0	9	7	0	0	0	0	0	5
-1:17I	0	0	2	0	0	7	0	0	5	0	0	18
-12:30D	0	12	0	0	19	0	0	0	0	0	0	0
-7:28D	0	12	0	0	0	4	0	0	0	0	15	0
-2:24I	0	0	11	0	0	12	0	0	0	0	0	8
-19:28D	0	0	2	0	8	9	0	2	0	1	0	9
-14:34D	0	2	1	0	0	20	0	0	0	0	6	1
-3:21D	0	6	4	1	7	8	0	0	0	0	0	4
-1:14I	0	0	0	0	5	6	0	0	9	0	0	9
5:1D	2	1	2	1	9	0	2	4	3	0	3	1
-23:22D	1	3	0	0	17	3	0	0	0	0	2	2
-1:41I	0	6	6	0	0	16	0	0	0	0	0	0
-19:20D	0	0	7	0	3	10	0	3	5	0	0	0
-1:32I	0	9	0	0	18	0	0	0	0	0	0	0
-25:27D	0	5	0	0	12	0	0	0	1	0	9	0
1:43I	0	10	9	1	0	7	0	0	0	0	0	0
-13:20D	0	0	0	0	0	0	0	25	0	0	0	2
-8:21D	0	8	1	0	0	3	0	0	0	0	14	0
-2:29I	0	0	3	0	0	11	0	0	7	0	0	5
-1:18I	0	0	19	0	0	6	0	0	0	0	0	0
-12:37D	0	0	0	0	22	3	0	0	0	0	0	0
-6:1D,-1:8D	0	0	0	0	3	9	0	13	0	0	0	0
-5:8D	0	6	11	0	4	3	0	0	0	0	0	0
-2:74I	0	9	0	0	0	15	0	0	0	0	0	0
-4:33D	0	0	13	0	0	1	0	3	0	0	7	0
-22:33D	0	0	8	0	7	9	0	0	0	0	0	0
4:1D	2	0	7	0	1	0	4	0	7	1	1	0
-11:19D	0	9	0	0	11	0	0	0	0	0	3	0
1:59I	0	0	6	0	0	0	0	17	0	0	0	0
1:26I	0	0	23	0	0	0	0	0	0	0	0	0
1:70I	0	0	0	0	6	9	0	0	0	0	0	8
-9:14D	0	3	0	0	0	18	0	0	0	0	1	0
-14:10D	0	8	14	0	0	0	0	0	0	0	0	0
-8:6D	0	17	0	0	0	5	0	0	0	0	0	0
-15:19D	0	20	2	0	0	0	0	0	0	0	0	0
1:77I	0	7	5	0	1	0	0	0	0	0	0	9
-10:12D	0	4	6	0	12	0	0	0	0	0	0	0
-2:3I	0	9	0	0	0	3	0	0	0	1	0	9
-15:23D	0	0	12	0	0	0	0	6	0	0	4	0
1:38I	0	0	9	0	8	0	0	0	5	0	0	0
1:13D	0	0	0	0	5	12	0	0	0	0	5	0
1:66I	0	3	7	0	3	8	0	0	0	0	0	0
-16:25D	0	5	3	0	10	0	0	3	0	0	0	0
-1:48I	0	2	5	0	4	0	0	0	10	0	0	0
-10:19D	0	7	8	0	0	6	0	0	0	0	0	0
-3:3I	0	3	0	0	5	8	0	0	2	0	0	3
-1:79I	0	0	21	0	0	0	0	0	0	0	0	0
-52:51D	0	0	0	0	0	21	0	0	0	0	0	0
-11:12D	0	14	1	0	0	0	0	0	5	0	0	0
-19:21D	0	2	8	0	4	1	0	5	0	0	0	0
-2:11D	0	0	1	0	10	0	0	0	0	0	0	9
1:18D	0	0	0	0	11	0	0	0	0	0	0	9
-6:1I	1	0	9	0	0	4	0	0	5	0	0	0
-7:1D	3	1	1	2	3	1	3	0	0	1	2	2
-14:12D	0	16	3	0	0	0	0	0	0	0	0	0
-2:8D	0	9	0	0	0	0	0	9	0	0	0	1
-1:45I	0	6	13	0	0	0	0	0	0	0	0	0
-16:13D	0	0	12	0	0	0	0	0	0	0	7	0
-23:23D	0	0	17	0	0	2	0	0	0	0	0	0
1:35I	0	0	3	0	0	13	0	0	0	0	0	3
-13:31D	0	0	7	0	2	2	0	0	0	0	8	0
-1:15I	0	0	1	0	0	9	0	0	5	0	4	0
1:56I	0	0	0	0	0	6	0	0	4	0	0	9
2:13I,5:5I	0	18	0	0	0	0	0	0	0	0	0	0
-1:40I	0	8	0	0	0	10	0	0	0	0	0	0
-16:18D	0	12	0	0	4	0	0	0	0	0	2	0
1:74I	0	0	10	0	0	8	0	0	0	0	0	0
1:30I	0	0	13	0	0	5	0	0	0	0	0	0
-10:6D	0	0	0	0	4	14	0	0	0	0	0	0
-13:26D	0	0	0	0	0	2	0	0	0	0	13	3
-2:86I,1:11I	0	0	0	0	0	0	1	17	0	0	0	0
-10:22D	0	16	1	0	0	0	0	0	0	0	0	0
1:80I	0	2	6	0	0	9	0	0	0	0	0	0
-1:8I	0	0	6	0	0	11	0	0	0	0	0	0
-12:14D	0	0	0	0	8	7	0	0	0	0	2	0
-3:1D	0	0	0	0	3	6	0	0	8	0	0	0
-6:1I,-1:2I	0	0	0	0	0	0	0	17	0	0	0	0
-19:18D	1	0	4	0	11	0	0	0	0	0	0	0
-20:26D	0	3	0	0	3	2	0	0	7	0	1	0
-16:1D,-8:8D	0	5	0	0	0	0	0	11	0	0	0	0
-1:1I,2:3D	0	16	0	0	0	0	0	0	0	0	0	0
-2:16I,2:5D	0	12	0	0	1	0	0	0	0	0	3	0
-13:28D	0	4	4	0	1	6	0	0	0	0	0	1
-1:10I	0	0	8	0	0	0	0	0	8	0	0	0
-4:9I,1:4D	0	0	16	0	0	0	0	0	0	0	0	0
2:1I	0	0	3	0	0	3	0	8	0	0	0	2
1:65I	0	0	6	0	0	5	0	0	0	0	0	5
-12:13D	0	0	5	0	3	0	0	0	0	0	8	0
-2:1I,1:2D	0	0	4	0	0	12	0	0	0	0	0	0
-1:7D	0	0	3	0	0	13	0	0	0	0	0	0
-1:38I	0	0	0	1	0	11	0	0	0	0	0	4
-14:23D	0	0	0	0	3	13	0	0	0	0	0	0
-7:16I,1:16I	0	15	0	0	0	0	0	0	0	0	0	0
-11:14I,-5:10I,1:3I	0	15	0	0	0	0	0	0	0	0	0	0
-1:28I	0	1	0	0	0	14	0	0	0	0	0	0
-9:30D	0	0	3	0	0	0	0	12	0	0	0	0
-2:24I,2:1I	0	0	2	0	0	1	0	0	4	0	0	8
1:50I	0	0	0	0	11	4	0	0	0	0	0	0
-12:20D	0	0	0	0	10	3	0	0	0	0	0	2
5:33D	0	0	0	0	15	0	0	0	0	0	0	0
-8:23D	0	0	0	0	5	9	0	0	0	0	1	0
-1:16D	0	0	0	0	0	6	0	9	0	0	0	0
-1:59I	0	0	0	0	0	15	0	0	0	0	0	0
1:34I	0	6	4	0	0	4	0	0	0	0	0	0
-2:1I,1:2D,5:9I	0	1	8	0	0	5	0	0	0	0	0	0
-3:64I	0	0	2	0	0	5	0	0	7	0	0	0
6:22I	0	0	4	0	0	10	0	0	0	0	0	0
-7:15D	0	0	7	0	5	2	0	0	0	0	0	0
-14:41D	0	0	2	0	0	12	0	0	0	0	0	0
-31:48D	0	0	4	0	0	0	0	0	0	0	0	10
-21:38D	0	0	5	0	0	3	0	0	0	0	6	0
-16:24D	0	0	0	0	8	5	0	0	0	0	1	0
1:2I,5:9I	0	0	0	0	4	1	0	0	0	0	9	0
-9:23I,1:5I	0	0	0	0	14	0	0	0	0	0	0	0
-1:7I	0	0	0	0	5	9	0	0	0	0	0	0
3:2I,6:83I	0	0	0	0	0	14	0	0	0	0	0	0
-12:17D	0	0	0	0	0	5	0	0	0	0	0	9
-10:1I,-9:18D	0	0	0	0	0	14	0	0	0	0	0	0
-3:4D	0	0	0	0	0	11	0	0	0	0	0	3
2:2D	1	1	0	0	5	6	0	0	0	0	0	0
-15:22D	0	8	0	0	0	5	0	0	0	0	0	0
-1:22D	0	8	0	0	3	2	0	0	0	0	0	0
-13:22I,-6:3D,1:3I	0	13	0	0	0	0	0	0	0	0	0	0
-9:33D	0	13	0	0	0	0	0	0	0	0	0	0
-1:25I	0	0	5	0	0	0	0	0	0	0	0	8
-1:5I	0	0	11	0	0	0	0	0	0	0	0	2
-2:5I	0	0	3	0	0	10	0	0	0	0	0	0
-17:20D	0	0	2	0	0	6	0	3	2	0	0	0
-14:1D	0	0	0	1	0	4	3	0	1	0	1	3
-17:25D	0	0	0	0	2	0	0	0	0	0	11	0
-17:42D	0	0	0	0	13	0	0	0	0	0	0	0
-2:12I	0	0	0	0	7	6	0	0	0	0	0	0
-1:75I	0	0	0	0	0	13	0	0	0	0	0	0
-5:25D	0	0	0	0	0	13	0	0	0	0	0	0
-15:32D	0	0	0	0	0	9	0	0	0	0	0	4
-14:5I,-1:2I	0	0	0	0	0	13	0	0	0	0	0	0
-4:6D	0	0	0	0	0	0	0	13	0	0	0	0
-13:6D,-4:6D	0	0	0	0	0	0	0	0	13	0	0	0
-6:23I,-1:38I	0	0	12	0	0	0	0	0	0	0	0	0
-34:43D	0	0	9	0	0	3	0	0	0	0	0	0
-15:11I,-10:21I,-3:2D	0	0	0	0	12	0	0	0	0	0	0	0
2:28I	0	0	0	0	12	0	0	0	0	0	0	0
4:58I	0	0	0	0	0	12	0	0	0	0	0	0
-25:25D	0	0	0	0	0	12	0	0	0	0	0	0
-11:29D	0	0	0	0	0	3	0	9	0	0	0	0
-16:8I,-14:13D	0	0	0	0	0	12	0	0	0	0	0	0
-1:2I,5:4D	0	0	0	0	0	12	0	0	0	0	0	0
1:7I	0	0	0	0	0	3	0	9	0	0	0	0
-5:12D	0	0	0	0	0	0	0	12	0	0	0	0
1:2D,5:12I	0	0	0	0	0	0	0	0	12	0	0	0
-12:32D	0	11	0	0	0	0	0	0	0	0	0	0
-16:1D,-10:46I,-4:27I,-1:16I	0	11	0	0	0	0	0	0	0	0	0	0
1:37I	0	1	7	0	0	3	0	0	0	0	0	0
-14:37D	0	6	0	0	0	5	0	0	0	0	0	0
-11:3I,-4:18I,-1:1D	0	11	0	0	0	0	0	0	0	0	0	0
1:45I	0	2	5	0	4	0	0	0	0	0	0	0
-9:1D	0	1	1	2	0	0	0	3	0	3	0	1
-9:21D	0	2	1	0	0	8	0	0	0	0	0	0
-12:39D	0	0	11	0	0	0	0	0	0	0	0	0
-15:18D	0	0	3	0	2	1	0	5	0	0	0	0
-1:1I,2:1I	0	0	11	0	0	0	0	0	0	0	0	0
-1:76I	0	0	2	0	0	9	0	0	0	0	0	0
-14:35D	0	0	1	0	5	1	0	0	0	0	4	0
-13:1D,-6:6D	0	0	2	0	0	0	0	0	9	0	0	0
-13:1I	0	0	8	0	1	0	0	0	0	0	2	0
-11:13D	0	0	3	0	7	0	0	0	0	0	1	0
-7:13I,-2:3I	0	0	0	0	11	0	0	0	0	0	0	0
-1:42I	0	0	0	0	7	4	0	0	0	0	0	0
-3:5I,1:4D	0	0	0	0	5	6	0	0	0	0	0	0
-1:72I	0	0	0	0	11	0	0	0	0	0	0	0
-3:67I	0	0	0	0	11	0	0	0	0	0	0	0
1:9I	0	0	0	0	3	0	0	0	0	0	8	0
1:67I	0	0	0	0	0	11	0	0	0	0	0	0
1:17I	0	0	0	0	0	9	0	2	0	0	0	0
1:54I	0	0	0	0	0	11	0	0	0	0	0	0
-6:1D,-1:2I,2:7D	0	0	0	0	0	9	0	0	0	0	2	0
-15:26D	0	0	0	0	0	3	0	0	0	0	8	0
3:31I	0	0	0	0	0	0	0	11	0	0	0	0
-5:9I	0	0	0	0	0	0	0	0	5	0	0	6
5:4I	0	0	0	0	0	0	0	0	11	0	0	0
-9:15D	0	0	0	0	0	0	0	0	0	0	1	10
-1:36I	0	0	0	0	0	0	0	0	0	0	0	11
-2:16I,4:1D	0	0	0	0	0	0	0	0	0	0	0	11
-2:4I,2:8I	0	10	0	0	0	0	0	0	0	0	0	0
-3:16D	0	7	0	0	2	0	0	0	0	0	1	0
-6:19D	0	10	0	0	0	0	0	0	0	0	0	0
-4:14D	0	5	1	0	3	0	0	0	0	0	0	1
-13:1D,-7:6D	0	10	0	0	0	0	0	0	0	0	0	0
1:19D	0	3	0	0	0	7	0	0	0	0	0	0
1:14I	0	9	0	1	0	0	0	0	0	0	0	0
-9:29D	0	2	8	0	0	0	0	0	0	0	0	0
-15:25D	0	0	10	0	0	0	0	0	0	0	0	0
-18:25D	0	0	10	0	0	0	0	0	0	0	0	0
5:19I	0	0	2	0	0	4	0	0	0	0	0	4
-5:3D	0	0	4	0	0	0	0	5	1	0	0	0
-1:74I	0	0	10	0	0	0	0	0	0	0	0	0
-2:68I	0	0	1	0	0	0	0	0	9	0	0	0
-6:7D	0	0	3	0	7	0	0	0	0	0	0	0
-13:2D	0	0	0	1	0	0	2	4	1	0	0	2
-8:1D,-3:35I	0	0	0	0	10	0	0	0	0	0	0	0
-14:30D	0	0	0	0	10	0	0	0	0	0	0	0
-4:2D	0	0	0	0	9	1	0	0	0	0	0	0
-5:21I,1:13I	0	0	0	0	10	0	0	0	0	0	0	0
1:29I	0	0	0	0	3	7	0	0	0	0	0	0
6:15I	0	0	0	0	1	9	0	0	0	0	0	0
-9:1D,-4:63I,-2:7I	0	0	0	0	0	10	0	0	0	0	0	0
-15:20I,-5:3I	0	0	0	0	0	10	0	0	0	0	0	0
-4:61I	0	0	0	0	0	10	0	0	0	0	0	0
-3:18I	0	0	0	0	0	10	0	0	0	0	0	0
-13:40D	0	0	0	0	0	10	0	0	0	0	0	0
-2:25I	0	0	0	0	0	10	0	0	0	0	0	0
-31:31D	0	0	0	0	0	10	0	0	0	0	0	0
-3:32D	0	0	0	0	0	0	0	0	0	0	10	0
-7:67I,-4:13I	0	9	0	0	0	0	0	0	0	0	0	0
1:8I,5:2I	0	9	0	0	0	0	0	0	0	0	0	0
-5:16D	0	9	0	0	0	0	0	0	0	0	0	0
-3:33I	0	9	0	0	0	0	0	0	0	0	0	0
-4:27D	0	9	0	0	0	0	0	0	0	0	0	0
-1:70I	0	9	0	0	0	0	0	0	0	0	0	0
-12:25D	0	6	0	0	0	0	0	0	0	0	3	0
-11:6D,-1:1D	0	9	0	0	0	0	0	0	0	0	0	0
-1:68I	0	5	0	0	0	0	0	0	0	0	4	0
-8:19D	0	2	7	0	0	0	0	0	0	0	0	0
5:16I	0	2	3	0	0	3	0	0	0	0	0	1
1:71I	0	4	0	0	0	5	0	0	0	0	0	0
-14:4D,-3:16I,-1:1D	0	0	9	0	0	0	0	0	0	0	0	0
1:62I	0	0	2	0	0	7	0	0	0	0	0	0
-3:74I	0	0	9	0	0	0	0	0	0	0	0	0
-16:1D,-6:6D	0	0	9	0	0	0	0	0	0	0	0	0
-1:23I	0	0	7	0	0	0	0	0	2	0	0	0
-5:89I,1:3I	0	0	9	0	0	0	0	0	0	0	0	0
1:68I	0	0	4	0	0	5	0	0	0	0	0	0
1:83I	0	0	2	0	0	7	0	0	0	0	0	0
-20:10D,-2:3D	0	0	0	0	9	0	0	0	0	0	0	0
1:90I	0	0	0	0	9	0	0	0	0	0	0	0
-13:25D	0	0	0	0	3	6	0	0	0	0	0	0
-5:21D	0	0	0	0	2	7	0	0	0	0	0	0
-6:1D,4:10D	0	0	0	0	9	0	0	0	0	0	0	0
-5:13D	0	0	0	0	2	0	0	0	7	0	0	0
1:57I	0	0	0	0	0	9	0	0	0	0	0	0
-27:38D	0	0	0	0	0	9	0	0	0	0	0	0
-3:20D	0	0	0	0	0	9	0	0	0	0	0	0
-20:13D,1:11I	0	0	0	0	0	9	0	0	0	0	0	0
-8:31I,-3:13I	0	0	0	0	0	9	0	0	0	0	0	0
-3:17I,3:9I,5:2D	0	0	0	0	0	9	0	0	0	0	0	0
-3:2D	0	0	0	0	0	4	0	0	0	0	0	5
-33:49D	0	0	0	0	0	0	0	0	0	0	9	0
-20:30D	1	5	2	0	0	0	0	0	0	0	0	0
-6:4I,-2:22I,1:6I	0	8	0	0	0	0	0	0	0	0	0	0
-9:64I,-4:8I,-1:11I	0	8	0	0	0	0	0	0	0	0	0	0
-5:3D,-1:2I,4:8D	0	8	0	0	0	0	0	0	0	0	0	0
-8:18I,1:40I	0	8	0	0	0	0	0	0	0	0	0	0
-1:63I	0	4	0	0	0	4	0	0	0	0	0	0
-5:85I,-1:1I	0	8	0	0	0	0	0	0	0	0	0	0
-12:19I,-6:59I	0	8	0	0	0	0	0	0	0	0	0	0
-1:84I	0	8	0	0	0	0	0	0	0	0	0	0
-13:14D	0	6	2	0	0	0	0	0	0	0	0	0
-2:44I	0	8	0	0	0	0	0	0	0	0	0	0
-1:61I	0	0	8	0	0	0	0	0	0	0	0	0
-22:23D	0	0	8	0	0	0	0	0	0	0	0	0
-1:8I,2:5D	0	0	8	0	0	0	0	0	0	0	0	0
1:16D	0	0	5	0	0	3	0	0	0	0	0	0
-8:39D	0	0	5	0	0	2	0	0	0	0	1	0
2:99I	0	0	8	0	0	0	0	0	0	0	0	0
5:8I	0	0	8	0	0	0	0	0	0	0	0	0
1:46I	0	0	3	0	0	0	0	0	0	0	0	5
-3:7D	0	0	0	1	0	1	0	0	5	0	1	0
-18:24D	0	0	0	0	8	0	0	0	0	0	0	0
-12:22I,-10:5D,-1:2I	0	0	0	0	8	0	0	0	0	0	0	0
-15:29I,-12:7I,-8:1D,1:23I	0	0	0	0	8	0	0	0	0	0	0	0
-3:59I	0	0	0	0	8	0	0	0	0	0	0	0
-13:19I,-5:4D	0	0	0	0	0	8	0	0	0	0	0	0
-10:35D	0	0	0	0	0	8	0	0	0	0	0	0
-5:5I,-1:4I	0	0	0	0	0	8	0	0	0	0	0	0
-6:1I,-2:2D	0	0	0	0	0	8	0	0	0	0	0	0
-1:2I,5:12I	0	0	0	0	0	8	0	0	0	0	0	0
-7:67I,-4:3D	0	0	0	0	0	8	0	0	0	0	0	0
-8:29D	0	0	0	0	0	8	0	0	0	0	0	0
-1:18I,1:1D	0	0	0	0	0	8	0	0	0	0	0	0
1:27I	0	0	0	0	0	1	0	0	0	0	0	7
-16:1D,-9:10D	0	0	0	0	0	0	0	0	8	0	0	0
-11:25I,-5:2I	0	0	0	0	0	0	0	0	8	0	0	0
-5:31I,-1:2I	0	0	0	0	0	0	0	0	8	0	0	0
-13:1D,-6:4D,3:2I	0	0	0	0	0	0	0	0	0	0	8	0
-35:36D	0	0	0	0	0	0	0	0	0	0	6	2
-1:65I	0	0	0	0	0	0	0	0	0	0	0	8
-7:38I,-1:20I	0	0	0	0	0	0	0	0	0	0	0	8
-9:19D	1	0	0	0	0	6	0	0	0	0	0	0
1:81I	0	5	0	0	0	2	0	0	0	0	0	0
-4:55I,-2:31I	0	7	0	0	0	0	0	0	0	0	0	0
1:2I,6:36I	0	7	0	0	0	0	0	0	0	0	0	0
-25:34D	0	7	0	0	0	0	0	0	0	0	0	0
1:5I,2:5D	0	7	0	0	0	0	0	0	0	0	0	0
-13:32D	0	7	0	0	0	0	0	0	0	0	0	0
-1:14D	0	7	0	0	0	0	0	0	0	0	0	0
-12:21D	0	4	0	0	1	2	0	0	0	0	0	0
-1:81I	0	7	0	0	0	0	0	0	0	0	0	0
-11:20D	0	2	1	0	4	0	0	0	0	0	0	0
-2:17D	0	0	7	0	0	0	0	0	0	0	0	0
-14:5D,-7:14I,-1:1I,5:22I	0	0	7	0	0	0	0	0	0	0	0	0
1:1D,4:18I	0	0	7	0	0	0	0	0	0	0	0	0
-13:24D	0	0	6	0	0	0	0	0	0	0	1	0
2:32I	0	0	7	0	0	0	0	0	0	0	0	0
-5:29I,-2:2D	0	0	0	0	7	0	0	0	0	0	0	0
-8:15D	0	0	0	0	7	0	0	0	0	0	0	0
-13:1D,-7:8D	0	0	0	0	7	0	0	0	0	0	0	0
-3:46I	0	0	0	0	7	0	0	0	0	0	0	0
-16:15D	0	0	0	0	4	1	0	0	0	0	0	2
-4:77I	0	0	0	0	7	0	0	0	0	0	0	0
-8:22I,-1:3I	0	0	0	0	7	0	0	0	0	0	0	0
-1:70I,2:3D	0	0	0	0	7	0	0	0	0	0	0	0
-12:25I,-8:21I,-4:30I,1:12I	0	0	0	0	7	0	0	0	0	0	0	0
1:69I	0	0	0	0	2	4	0	0	1	0	0	0
-16:1D,-9:9D	0	0	0	0	0	7	0	0	0	0	0	0
-1:69I	0	0	0	0	0	7	0	0	0	0	0	0
-2:35I	0	0	0	0	0	7	0	0	0	0	0	0
5:17I	0	0	0	0	0	7	0	0	0	0	0	0
-2:59I	0	0	0	0	0	7	0	0	0	0	0	0
1:6I,5:2D	0	0	0	0	0	7	0	0	0	0	0	0
-3:11D	0	0	0	0	0	7	0	0	0	0	0	0
1:51I	0	0	0	0	0	7	0	0	0	0	0	0
-3:45I	0	0	0	0	0	7	0	0	0	0	0	0
-13:29I,-2:2D	0	0	0	0	0	7	0	0	0	0	0	0
-16:34D	0	0	0	0	0	1	0	0	0	0	6	0
-5:27I,-3:1D,2:12I	0	0	0	0	0	7	0	0	0	0	0	0
-3:11I,2:1I	0	0	0	0	0	7	0	0	0	0	0	0
3:20I,5:5I	0	0	0	0	0	7	0	0	0	0	0	0
-13:2D,-5:9D	0	0	0	0	0	0	0	7	0	0	0	0
-16:1D,-11:14D	0	0	0	0	0	0	0	7	0	0	0	0
2:79I	0	0	0	0	0	0	0	7	0	0	0	0
-1:23D	0	0	0	0	0	0	0	7	0	0	0	0
-1:1I,2:4D	0	0	0	0	0	0	0	3	0	0	0	4
-16:40D	0	0	0	0	0	0	0	7	0	0	0	0
6:10I	0	0	0	0	0	0	0	0	7	0	0	0
2:4D	0	0	0	0	0	0	0	0	7	0	0	0
-15:24D	0	0	0	0	0	0	0	0	0	0	7	0
-1:15D	0	0	0	0	0	0	0	0	0	0	7	0
-13:38D	0	0	0	0	0	0	0	0	0	0	0	7
-21:23D	0	5	0	0	0	1	0	0	0	0	0	0
-36:39D	0	6	0	0	0	0	0	0	0	0	0	0
1:1D,3:28I	0	6	0	0	0	0	0	0	0	0	0	0
-3:2I	0	5	1	0	0	0	0	0	0	0	0	0
-1:53I	0	6	0	0	0	0	0	0	0	0	0	0
-1:6I,4:6I	0	6	0	0	0	0	0	0	0	0	0	0
1:16I	0	6	0	0	0	0	0	0	0	0	0	0
-6:32I,-2:1I	0	6	0	0	0	0	0	0	0	0	0	0
-10:23D	0	1	0	0	0	0	0	0	5	0	0	0
-8:58I,-1:1D	0	6	0	0	0	0	0	0	0	0	0	0
-7:8D,4:3I	0	0	6	0	0	0	0	0	0	0	0	0
-21:32D	0	0	6	0	0	0	0	0	0	0	0	0
-1:6I	0	0	2	0	0	2	0	0	2	0	0	0
3:23I	0	0	6	0	0	0	0	0	0	0	0	0
-5:4I	0	0	6	0	0	0	0	0	0	0	0	0
-4:5D	0	0	6	0	0	0	0	0	0	0	0	0
1:47I	0	0	6	0	0	0	0	0	0	0	0	0
1:14D	0	0	6	0	0	0	0	0	0	0	0	0
1:73I	0	0	6	0	0	0	0	0	0	0	0	0
2:30I	0	0	6	0	0	0	0	0	0	0	0	0
-6:15D	0	0	1	0	0	0	0	0	5	0	0	0
-3:4I	0	0	5	0	0	1	0	0	0	0	0	0
-2:45I	0	0	6	0	0	0	0	0	0	0	0	0
-2:24I,1:1D	0	0	6	0	0	0	0	0	0	0	0	0
-16:19D	0	0	0	0	6	0	0	0	0	0	0	0
-3:40I	0	0	0	0	3	3	0	0	0	0	0	0
-13:6D	0	0	0	0	1	5	0	0	0	0	0	0
-14:43D	0	0	0	0	6	0	0	0	0	0	0	0
-10:6D,-2:2D	0	0	0	0	0	6	0	0	0	0	0	0
-6:89I	0	0	0	0	0	6	0	0	0	0	0	0
5:24I	0	0	0	0	0	6	0	0	0	0	0	0
-1:73I	0	0	0	0	0	6	0	0	0	0	0	0
-3:60I	0	0	0	0	0	6	0	0	0	0	0	0
-27:16D	0	0	0	0	0	6	0	0	0	0	0	0
-4:86I	0	0	0	0	0	6	0	0	0	0	0	0
-2:23I	0	0	0	0	0	6	0	0	0	0	0	0
-1:2I,2:9D	0	0	0	0	0	6	0	0	0	0	0	0
-13:12I,-10:36I,-5:19I	0	0	0	0	0	0	0	6	0	0	0	0
-19:40D	0	0	0	0	0	0	0	0	6	0	0	0
5:46I	0	0	0	0	0	0	0	0	0	0	0	6
3:61I	0	0	0	0	0	0	0	0	0	0	0	6
6:12I	0	0	0	0	0	0	0	0	0	0	0	6
-9:6D,-1:1D	0	0	0	0	0	0	0	0	0	0	0	6
1:88I	0	5	0	0	0	0	0	0	0	0	0	0
-9:3I,-3:4I,1:5I	0	5	0	0	0	0	0	0	0	0	0	0
-21:45D	0	5	0	0	0	0	0	0	0	0	0	0
-7:30I,1:59I	0	5	0	0	0	0	0	0	0	0	0	0
2:5D	0	5	0	0	0	0	0	0	0	0	0	0
-2:9I,2:14I	0	5	0	0	0	0	0	0	0	0	0	0
-29:29D	0	5	0	0	0	0	0	0	0	0	0	0
-7:6D,2:8D	0	5	0	0	0	0	0	0	0	0	0	0
-14:8I,-8:6I,1:3I	0	5	0	0	0	0	0	0	0	0	0	0
-3:30I	0	5	0	0	0	0	0	0	0	0	0	0
-13:7D,-4:16I,1:22I	0	5	0	0	0	0	0	0	0	0	0	0
-2:5D	0	5	0	0	0	0	0	0	0	0	0	0
-3:1I	0	4	0	0	1	0	0	0	0	0	0	0
-16:1D,-8:3I,-4:24I,-1:4I	0	0	5	0	0	0	0	0	0	0	0	0
-15:13D	0	0	5	0	0	0	0	0	0	0	0	0
-20:27D	0	0	5	0	0	0	0	0	0	0	0	0
-1:66I	0	0	5	0	0	0	0	0	0	0	0	0
-8:36I,-3:42I	0	0	5	0	0	0	0	0	0	0	0	0
2:41I	0	0	5	0	0	0	0	0	0	0	0	0
-7:34I,-4:3D	0	0	5	0	0	0	0	0	0	0	0	0
-8:24D	0	0	5	0	0	0	0	0	0	0	0	0
-24:24D	0	0	5	0	0	0	0	0	0	0	0	0
-14:20D	0	0	5	0	0	0	0	0	0	0	0	0
-16:21D	0	0	3	0	2	0	0	0	0	0	0	0
-7:12D	0	0	5	0	0	0	0	0	0	0	0	0
-4:12D	0	0	5	0	0	0	0	0	0	0	0	0
-8:4D	0	0	5	0	0	0	0	0	0	0	0	0
-1:83I	0	0	4	0	0	1	0	0	0	0	0	0
-2:24D	0	0	5	0	0	0	0	0	0	0	0	0
-8:9D	0	0	1	1	2	0	0	0	0	0	1	0
-26:27D	0	0	5	0	0	0	0	0	0	0	0	0
1:20I	0	0	1	0	0	4	0	0	0	0	0	0
-3:2D,1:1I	0	0	0	0	5	0	0	0	0	0	0	0
-2:38I	0	0	0	0	5	0	0	0	0	0	0	0
-3:93I	0	0	0	0	5	0	0	0	0	0	0	0
1:2D,5:4D	0	0	0	0	5	0	0	0	0	0	0	0
-17:30D	0	0	0	0	3	2	0	0	0	0	0	0
3:24I,6:11I	0	0	0	0	5	0	0	0	0	0	0	0
-20:17D	0	0	0	0	5	0	0	0	0	0	0	0
-7:30D	0	0	0	0	5	0	0	0	0	0	0	0
1:32I	0	0	0	0	5	0	0	0	0	0	0	0
-4:1I,-2:3D	0	0	0	0	5	0	0	0	0	0	0	0
1:64I	0	0	0	0	4	1	0	0	0	0	0	0
-2:76I	0	0	0	0	0	5	0	0	0	0	0	0
-11:20I,-8:29I,-1:16I	0	0	0	0	0	5	0	0	0	0	0	0
-9:8I,-7:4I,-6:3D	0	0	0	0	0	5	0	0	0	0	0	0
-20:23D	0	0	0	0	0	3	0	0	0	0	2	0
1:23I	0	0	0	0	0	5	0	0	0	0	0	0
-14:25I,-6:13D	0	0	0	0	0	5	0	0	0	0	0	0
-16:1D,-11:23D	0	0	0	0	0	5	0	0	0	0	0	0
-9:11I,-7:1I,-3:6I,1:7I	0	0	0	0	0	5	0	0	0	0	0	0
-2:31I	0	0	0	0	0	2	0	0	3	0	0	0
-7:4D	0	0	0	0	0	5	0	0	0	0	0	0
4:3I	0	0	0	0	0	5	0	0	0	0	0	0
-3:14D	0	0	0	0	0	5	0	0	0	0	0	0
-10:31D	0	0	0	0	0	3	0	0	2	0	0	0
3:20I	0	0	0	0	0	0	0	2	3	0	0	0
-6:28D	0	0	0	0	0	0	0	5	0	0	0	0
5:15I	0	0	0	0	0	0	0	5	0	0	0	0
4:82I	0	0	0	0	0	0	0	0	5	0	0	0
-1:20D	0	0	0	0	0	0	0	0	5	0	0	0
-4:1I,-1:8D	0	0	0	0	0	0	0	0	5	0	0	0
-6:1D,2:3D	0	0	0	0	0	0	0	0	5	0	0	0
-6:1I,3:10I	0	0	0	0	0	0	0	0	5	0	0	0
-2:73I	0	0	0	0	0	0	0	0	5	0	0	0
1:98I	0	0	0	0	0	0	0	0	0	0	5	0
1:13I	0	0	0	0	0	0	0	0	0	0	5	0
-3:2D,6:14I	0	0	0	0	0	0	0	0	0	0	5	0
-22:30D	0	0	0	0	0	0	0	0	0	0	5	0
3:6I	0	0	0	0	0	0	0	0	0	0	0	5
-1:37I	0	0	0	0	0	0	0	0	0	0	0	5
-3:10D	1	0	0	0	3	0	0	0	0	0	0	0
-12:9D	0	4	0	0	0	0	0	0	0	0	0	0
-2:72I	0	4	0	0	0	0	0	0	0	0	0	0
-1:1I,5:9I	0	4	0	0	0	0	0	0	0	0	0	0
-10:1I,-6:3I,1:30I	0	4	0	0	0	0	0	0	0	0	0	0
-1:2D,5:13I	0	4	0	0	0	0	0	0	0	0	0	0
1:48I	0	1	0	0	0	0	0	0	0	0	0	3
-1:35I	0	4	0	0	0	0	0	0	0	0	0	0
1:46I,5:25I	0	4	0	0	0	0	0	0	0	0	0	0
-14:11D,1:29I	0	4	0	0	0	0	0	0	0	0	0	0
-2:7D	0	4	0	0	0	0	0	0	0	0	0	0
-3:89I	0	4	0	0	0	0	0	0	0	0	0	0
-17:23D	0	4	0	0	0	0	0	0	0	0	0	0
1:2I,4:10D	0	4	0	0	0	0	0	0	0	0	0	0
2:6D	0	3	1	0	0	0	0	0	0	0	0	0
-7:19D	0	4	0	0	0	0	0	0	0	0	0	0
-3:22I	0	0	4	0	0	0	0	0	0	0	0	0
-15:2D,-7:8D	0	0	4	0	0	0	0	0	0	0	0	0
-2:6I	0	0	4	0	0	0	0	0	0	0	0	0
-2:70I	0	0	4	0	0	0	0	0	0	0	0	0
-16:1D,-12:4I,-8:1D,-4:16I,1:9I	0	0	4	0	0	0	0	0	0	0	0	0
1:2I,5:12I	0	0	4	0	0	0	0	0	0	0	0	0
-18:18D	0	0	3	0	0	1	0	0	0	0	0	0
-2:66I	0	0	4	0	0	0	0	0	0	0	0	0
-45:60D	0	0	3	0	0	1	0	0	0	0	0	0
1:75I	0	0	4	0	0	0	0	0	0	0	0	0
-1:64I	0	0	4	0	0	0	0	0	0	0	0	0
-13:11I,-10:17I,-6:23I,-1:34I	0	0	4	0	0	0	0	0	0	0	0	0
-17:18D	0	0	4	0	0	0	0	0	0	0	0	0
[truncated: 334 more rows]

## Sheet: HEK293T_EMX1
Sample	I.NT	I.RNP...65mer.unco...SpCas9.WT.	I.RNPD...65mer.coup...SpCas9.SNAP.	II.NT	II.RNP...65mer.unco...SpCas9.WT.	II.RNPD...65mer.coup...SpCas9.SNAP.	III.NT	III.RNP...65mer.unco...SpCas9.WT.	III.RNPD...65mer.coup...SpCas9.SNAP.	IV.NT	IV.RNP.unco..65.mer..SpCas9.WT.	IV.RNPD.coup..65.mer..SpCas9.SNAP.
no variant	117415	117695	99060	104851	106603	107823	102065	118468	105665	98554	87565	87337
Corrected: SNV:-1C,1T,2C	1	120	5018	1	51	214	0	56	925	0	51	960
SNV:-6G	57	71	41	45	99	48	35	54	44	37	70	36
SNV:-13A	34	35	36	48	56	38	24	44	26	24	43	19
SNV:4A	17	24	11	18	110	29	21	20	22	19	91	31
SNV:-14C	36	38	38	40	61	38	25	29	23	20	47	14
SNV:-16G	28	29	52	34	79	47	8	26	24	26	39	15
SNV:-8G	33	25	26	30	75	22	26	21	25	17	43	24
SNV:-5A	19	28	9	16	91	19	16	12	18	15	45	18
SNV:4G	18	14	19	24	81	15	13	18	16	21	50	15
SNV:4C	15	23	15	22	43	12	22	36	13	23	37	17
SNV:-2C	22	21	17	18	21	18	23	19	32	26	12	16
SNV:-7G	16	17	13	19	48	25	8	17	16	19	32	12
SNV:-4G	17	18	19	25	33	21	12	18	18	16	21	18
SNV:-4T	22	20	14	11	24	20	10	17	19	18	8	9
SNV:-11C	10	12	13	13	20	19	14	23	20	23	8	13
SNV:1T	14	21	27	12	28	20	11	9	15	7	10	9
SNV:-16C	12	17	21	19	11	17	13	15	5	13	13	20
SNV:-17T	10	18	7	13	43	17	4	8	10	7	30	6
SNV:-14G	20	12	17	12	16	10	12	25	13	14	5	12
SNV:3A	18	10	7	16	46	8	8	13	11	7	12	8
SNV:-1C	7	17	33	10	11	15	11	5	24	6	11	12
SNV:-8C	9	15	12	8	56	7	6	5	5	6	22	10
SNV:-1G	15	6	20	13	12	19	10	23	13	10	12	6
SNV:-9T	20	15	11	7	26	11	5	15	17	14	11	6
SNV:-15T	13	19	12	11	15	20	10	12	16	9	16	4
SNV:6A	6	15	19	8	22	14	10	10	8	7	12	5
SNV:-10A	2	14	9	8	28	11	9	8	10	7	23	5
SNV:-13T	12	16	9	15	11	12	4	14	9	10	13	7
SNV:-12A	19	6	8	11	20	12	9	15	11	7	6	8
SNV:-6C	13	4	11	10	16	9	9	6	18	9	12	6
SNV:-16A	14	9	9	6	8	22	7	5	6	10	13	9
SNV:3T	9	12	7	6	17	15	3	13	8	6	12	9
SNV:-17A	9	13	9	6	7	10	4	16	13	4	14	9
SNV:-7C	6	8	7	7	31	9	3	6	7	7	16	4
SNV:5A	12	18	5	10	9	12	9	11	5	3	6	10
SNV:2T	8	12	14	15	7	14	8	5	5	6	6	8
SNV:5T	5	4	4	7	23	10	11	9	8	10	14	2
SNV:-9A	11	4	6	8	14	2	10	9	9	6	10	11
SNV:-3T	8	4	12	11	6	12	10	8	9	9	4	7
SNV:1T,2C	1	3	61	2	1	12	0	0	9	0	1	8
SNV:-12T	1	6	6	10	7	11	9	13	5	14	7	7
SNV:-10T	12	6	8	6	6	11	9	8	8	8	6	6
SNV:-5C	5	6	5	7	23	5	5	5	4	5	18	6
SNV:-2G	2	7	4	6	28	3	5	3	2	1	23	4
SNV:-11A	9	10	8	11	11	5	6	4	4	3	6	7
SNV:-11G	7	3	7	6	19	4	7	5	4	5	10	5
SNV:-6A	8	12	6	5	10	4	7	10	7	3	6	3
SNV:-4C	8	4	8	4	15	10	2	6	5	4	7	3
SNV:2C	6	5	21	0	3	8	1	4	7	8	4	6
SNV:1A	13	8	8	6	6	7	4	5	1	6	4	4
SNV:-14T	5	5	11	4	14	7	6	2	5	3	6	3
SNV:2A	13	3	3	3	7	8	6	5	3	9	3	5
SNV:-1T	3	9	4	13	4	5	8	5	6	6	2	1
SNV:-15A	6	8	5	8	10	6	3	2	6	2	4	2
SNV:-1C,2C	3	2	29	1	3	2	2	1	7	0	1	7
SNV:6T	3	5	8	7	11	7	4	3	1	2	5	2
SNV:-5T	6	2	6	5	7	3	5	3	2	3	5	6
SNV:-8T	3	5	6	2	7	2	4	7	7	3	3	3
SNV:3C	3	0	2	1	21	3	1	2	1	2	5	1
SNV:-7T	2	3	1	4	8	2	4	5	4	2	5	1
SNV:1C	3	4	12	0	1	3	1	5	0	3	2	2
SNV:-1C,1T	0	0	21	1	3	2	0	0	4	1	0	3
SNV:-15G	3	3	2	1	6	1	5	4	2	1	0	2
SNV:5C	1	3	5	0	4	4	3	0	3	3	3	1
SNV:-9G	3	1	3	2	6	3	1	3	3	2	0	1
SNV:6C	3	3	1	2	5	0	3	5	0	0	0	4
SNV:-3A	4	4	0	0	5	1	1	2	1	2	4	1
SNV:-13A,-12A	1	4	2	2	5	2	4	1	1	0	2	1
SNV:-2A	5	1	2	2	3	3	1	1	2	0	1	2
SNV:-10G	5	1	0	2	2	3	1	1	1	2	0	5
SNV:-16G,-6G	3	0	1	1	4	6	1	1	1	0	1	1
SNV:-12G	2	3	0	2	3	1	1	1	1	0	4	0
SNV:-3G	2	1	1	5	2	1	0	1	1	0	3	1
SNV:-17C	0	3	1	0	2	3	1	2	3	1	0	2
SNV:-13G	3	0	0	1	3	2	2	3	2	0	1	0
SNV:-14C,4G	0	3	3	3	2	0	0	0	1	1	2	0
SNV:-6G,-5A	0	1	0	0	9	1	0	0	0	0	2	0
SNV:-8C,-7C	1	0	1	0	4	0	1	0	0	0	3	1
SNV:-5C,4C	1	0	0	1	1	0	0	1	2	1	4	0
SNV:-8C,-5C	0	0	2	0	5	0	1	0	0	1	0	2
SNV:-7G,-6G	0	0	0	0	7	0	0	0	1	0	3	0
SNV:-8C,4A	0	1	0	0	2	0	2	0	0	0	5	0
SNV:-8G,-6G	0	0	1	3	2	0	0	0	0	0	3	1
SNV:-17T,4A	0	0	0	1	6	0	0	0	1	1	0	1
SNV:-5A,3A	0	0	0	1	8	0	0	0	0	0	1	0
SNV:-7C,-5C	0	1	0	0	6	0	0	0	0	0	2	0
SNV:-16G,-8G	0	1	1	0	5	0	1	0	0	0	1	0
SNV:-2C,-1C,1T,2C	0	0	6	0	0	0	0	0	2	0	0	1
SNV:-1C,4G	1	0	0	1	2	1	0	0	0	0	2	0
SNV:-12A,-10A	0	0	0	0	1	0	2	0	0	3	1	0
SNV:1C,2T,4A,5A	0	0	0	0	7	0	0	0	0	0	0	0
SNV:-7C,4A	0	0	0	0	5	2	0	0	0	0	0	0
SNV:-16G,-5A	0	1	1	0	4	0	0	0	0	0	0	0
SNV:-8C,4C	0	1	1	0	0	1	0	1	0	1	0	1
SNV:-16G,-7G	0	0	0	1	2	0	0	0	1	0	2	0
SNV:1T,2T,3T,5T,6T	1	0	0	0	1	1	1	0	0	0	0	1
SNV:-9A,-7G	1	0	0	2	0	0	0	0	1	0	1	0
SNV:-10A,-9A	1	0	0	0	3	0	0	0	0	0	1	0
SNV:-13A,4G	0	1	0	0	2	0	0	0	1	1	0	0
SNV:-1C,1T,2C,4C	0	0	5	0	0	0	0	0	0	0	0	0
SNV:-8G,-1C,1T,2C	0	0	5	0	0	0	0	0	0	0	0	0
SNV:-8G,-7G	0	0	0	1	3	0	0	0	0	0	1	0
SNV:-16G,-10A	0	0	0	1	2	2	0	0	0	0	0	0
SNV:-15A,-14C	0	0	0	1	1	1	0	0	0	0	0	2
SNV:3A,6A	0	0	0	0	3	0	0	0	1	0	1	0
SNV:-5C,4A	0	0	0	0	4	0	0	0	0	1	0	0
SNV:-10A,-5A	0	0	0	0	4	0	0	0	0	0	1	0
SNV:-17T,-16G	0	0	0	0	3	0	0	0	0	0	2	0
SNV:-7G,-5A	0	2	0	0	0	0	0	0	0	0	2	0
SNV:-10A,-6G	0	1	0	0	2	0	0	0	0	0	1	0
SNV:-17T,-14C	0	1	1	0	2	0	0	0	0	0	0	0
SNV:-16A,-1C,1T,2C	0	0	4	0	0	0	0	0	0	0	0	0
SNV:-14C,-1C,1T,2C	0	0	4	0	0	0	0	0	0	0	0	0
SNV:-16G,-8G,-6G	0	0	1	0	2	0	0	0	0	1	0	0
SNV:-14C,-11G,4G	0	0	2	0	0	0	1	0	0	1	0	0
SNV:-14C,-13A	0	0	1	0	0	0	0	1	0	0	1	1
SNV:-6G,3A	0	0	0	1	1	0	0	2	0	0	0	0
SNV:-13A,4A	0	0	0	1	1	1	1	0	0	0	0	0
SNV:-17T,1T	0	0	0	0	2	0	0	0	0	0	2	0
SNV:-17T,-13A	0	0	0	0	3	0	0	0	0	0	1	0
SNV:-12A,-11G,-10A,4G	0	0	0	0	0	2	0	0	0	2	0	0
SNV:-13G,-12A	0	0	0	0	0	0	3	1	0	0	0	0
SNV:-7C,4C	0	0	0	0	0	0	0	0	1	1	2	0
SNV:-10A,-7G	1	0	0	0	1	0	0	0	1	0	0	0
SNV:-17T,-12A	1	1	0	0	0	1	0	0	0	0	0	0
SNV:-8G,-2C	1	0	0	0	1	0	0	0	0	0	1	0
SNV:-5C,3C,4C	0	1	0	1	0	0	0	0	1	0	0	0
SNV:-8C,-7C,4C	0	1	0	0	1	0	0	0	0	1	0	0
SNV:-1C,1T,2A	0	0	3	0	0	0	0	0	0	0	0	0
SNV:-1C,1T,2T	0	0	3	0	0	0	0	0	0	0	0	0
SNV:-15T,-1C,1T,2C	0	0	2	0	0	0	0	0	1	0	0	0
SNV:-1C,1C	0	0	3	0	0	0	0	0	0	0	0	0
SNV:-1G,1T	0	0	3	0	0	0	0	0	0	0	0	0
SNV:-7G,-1C,1T,2C	0	0	2	0	0	1	0	0	0	0	0	0
SNV:-12A,4G	0	0	1	0	0	0	1	1	0	0	0	0
SNV:-13A,-1C,1T,2C	0	0	1	0	0	0	0	0	2	0	0	0
SNV:-13A,-12A,-11G,-10A,4G	0	0	0	1	0	0	0	0	0	1	0	1
SNV:3T,4G	0	0	0	1	0	0	1	0	0	1	0	0
SNV:3T,5T	0	0	0	0	1	1	0	0	0	0	0	1
SNV:-8G,-5A	0	0	0	0	2	0	0	0	0	0	1	0
SNV:-6G,4G	0	0	0	0	1	0	0	1	0	1	0	0
SNV:-6G,6A	0	0	0	0	2	0	0	0	0	0	1	0
SNV:-7G,3A	0	0	0	0	3	0	0	0	0	0	0	0
SNV:-16G,-9A	0	0	0	0	2	0	0	0	0	0	1	0
SNV:-14C,5T	0	0	0	0	2	0	0	0	0	0	1	0
SNV:-16G,3A	0	0	0	0	2	0	0	0	0	0	1	0
SNV:-8G,3A	0	0	0	0	1	0	0	0	1	1	0	0
SNV:2T,4A	0	0	0	0	1	1	0	0	0	0	0	1
SNV:-5A,-2C	0	0	0	0	1	1	0	1	0	0	0	0
SNV:-1G,4G	0	0	0	0	0	2	0	0	0	0	0	1
SNV:1T,2T,3T,5T	0	0	0	0	0	1	0	0	1	0	1	0
SNV:-9A,-4T	0	0	0	0	0	1	0	0	0	0	2	0
SNV:-9A,-5A	0	0	0	0	0	1	0	0	0	0	2	0
SNV:-4G,-3A	0	0	0	0	0	0	0	2	0	1	0	0
SNV:-14C,4A	0	0	0	0	0	0	0	0	3	0	0	0
SNV:-2G,3A	0	0	0	0	0	0	0	0	1	0	2	0
SNV:-11C,-1C,1T,2C	0	0	0	0	0	0	0	0	0	0	0	3
SNV:-6A,-5A	1	0	0	0	1	0	0	0	0	0	0	0
SNV:-16G,6A	1	0	0	0	0	0	0	0	0	0	1	0
SNV:3T,5T,6T	1	0	0	0	1	0	0	0	0	0	0	0
SNV:-17T,-16A	1	1	0	0	0	0	0	0	0	0	0	0
SNV:-17T,-10A	1	0	0	0	1	0	0	0	0	0	0	0
SNV:-12A,-11G	1	0	0	0	0	1	0	0	0	0	0	0
SNV:-10A,-9A,3A	1	0	0	0	0	0	0	0	0	0	1	0
SNV:-7C,-1C	1	0	0	0	1	0	0	0	0	0	0	0
SNV:-14C,2T	1	0	0	0	0	0	0	0	0	0	1	0
SNV:1T,4A	1	0	0	0	0	0	0	1	0	0	0	0
SNV:-6G,-2G	1	0	0	0	1	0	0	0	0	0	0	0
SNV:1T,3T	0	1	0	0	1	0	0	0	0	0	0	0
SNV:2C,4G	0	1	0	0	0	0	1	0	0	0	0	0
SNV:-4T,1T	0	2	0	0	0	0	0	0	0	0	0	0
SNV:-14C,-1G,4G	0	1	0	1	0	0	0	0	0	0	0	0
SNV:1C,2C	0	1	0	0	0	0	0	0	1	0	0	0
SNV:-16G,-10G	0	1	0	0	1	0	0	0	0	0	0	0
SNV:-2A,-1T,1T,2T	0	2	0	0	0	0	0	0	0	0	0	0
SNV:3C,5T	0	1	0	0	1	0	0	0	0	0	0	0
SNV:-4T,-1C,1T,2C	0	0	2	0	0	0	0	0	0	0	0	0
SNV:-4C,-1C	0	0	1	1	0	0	0	0	0	0	0	0
SNV:-17A,-1C,1T,2C	0	0	1	0	0	0	0	0	0	0	0	1
SNV:-12T,-5A	0	0	1	0	1	0	0	0	0	0	0	0
SNV:-6G,-1C,1T,2C	0	0	2	0	0	0	0	0	0	0	0	0
SNV:3A,4G	0	0	2	0	0	0	0	0	0	0	0	0
SNV:-17T,-1C,1T,2C	0	0	1	0	0	0	0	0	1	0	0	0
SNV:-14C,-4G	0	0	1	0	0	0	0	0	0	1	0	0
SNV:-4T,4G	0	0	1	0	1	0	0	0	0	0	0	0
SNV:-7C,-5C,4C	0	0	2	0	0	0	0	0	0	0	0	0
SNV:-9T,-1C,1T,2C	0	0	1	0	1	0	0	0	0	0	0	0
SNV:1T,4C	0	0	1	0	0	1	0	0	0	0	0	0
SNV:-1C,1T,2C,4A	0	0	2	0	0	0	0	0	0	0	0	0
SNV:-14G,-8T	0	0	0	2	0	0	0	0	0	0	0	0
SNV:-7T,3T	0	0	0	1	0	0	0	0	0	0	0	1
SNV:-11G,4G	0	0	0	1	0	0	0	0	0	1	0	0
SNV:1C,3A	0	0	0	1	0	0	0	0	0	0	0	1
SNV:-10A,6A	0	0	0	0	2	0	0	0	0	0	0	0
SNV:-7C,3C	0	0	0	0	1	0	0	0	0	0	1	0
SNV:-6G,-5A,3A	0	0	0	0	2	0	0	0	0	0	0	0
SNV:-8G,-6G,3A	0	0	0	0	2	0	0	0	0	0	0	0
SNV:-5C,-2G	0	0	0	0	1	0	0	0	0	0	1	0
SNV:1T,3A	0	0	0	0	1	0	0	1	0	0	0	0
SNV:-7G,-5A,3A	0	0	0	0	2	0	0	0	0	0	0	0
SNV:-4T,3T	0	0	0	0	2	0	0	0	0	0	0	0
SNV:-2G,4A	0	0	0	0	1	0	0	0	0	0	1	0
SNV:-6G,5A	0	0	0	0	1	0	0	0	0	0	0	1
SNV:-5A,4C	0	0	0	0	1	0	0	0	0	0	1	0
SNV:-6G,-3A	0	0	0	0	2	0	0	0	0	0	0	0
SNV:-6G,-4T	0	0	0	0	1	0	1	0	0	0	0	0
SNV:-6G,-1C	0	0	0	0	2	0	0	0	0	0	0	0
SNV:-14C,-1C	0	0	0	0	1	0	0	0	0	0	1	0
SNV:-14C,-4T	0	0	0	0	1	0	0	0	0	0	1	0
SNV:-17T,-6G	0	0	0	0	1	0	0	0	0	0	1	0
SNV:-14C,1T	0	0	0	0	1	0	0	0	1	0	0	0
SNV:-5T,2T	0	0	0	0	1	0	0	1	0	0	0	0
SNV:-16G,-6G,-5A	0	0	0	0	1	0	1	0	0	0	0	0
SNV:-13A,-5A	0	0	0	0	1	0	0	0	1	0	0	0
SNV:-13A,3C	0	0	0	0	1	0	0	0	1	0	0	0
SNV:-16G,-8C	0	0	0	0	1	0	0	0	0	0	1	0
SNV:-8C,-7C,-5C	0	0	0	0	2	0	0	0	0	0	0	0
SNV:-8C,-5C,4C	0	0	0	0	1	0	0	0	0	0	1	0
SNV:-5A,-1C,1T,2C	0	0	0	0	0	2	0	0	0	0	0	0
SNV:-7T,4G	0	0	0	0	0	1	0	0	0	1	0	0
SNV:-1C,1C,2C	0	0	0	0	0	1	0	0	1	0	0	0
SNV:-13A,-6G	0	0	0	0	0	1	0	0	0	1	0	0
SNV:-5A,4A	0	0	0	0	0	1	0	0	0	0	1	0
SNV:-8C,-2C	0	0	0	0	0	0	1	0	0	0	1	0
SNV:-17T,-14C,4G	0	0	0	0	0	0	0	1	1	0	0	0
SNV:2C,4C	0	0	0	0	0	0	0	1	0	0	1	0
SNV:-8G,-4G	0	0	0	0	0	0	0	1	1	0	0	0
SNV:-2A,1C,2C,3A,4A,5T	0	0	0	0	0	0	0	0	2	0	0	0
SNV:-2A,1C,2C,3A,4C,5A	0	0	0	0	0	0	0	0	2	0	0	0
SNV:-16C,-6G	0	0	0	0	0	0	0	0	1	0	0	1
SNV:-9A,-6G	0	0	0	0	0	0	0	0	1	1	0	0
SNV:-11C,-7G	0	0	0	0	0	0	0	0	0	2	0	0
SNV:-10T,6A	0	0	0	0	0	0	0	0	0	1	1	0
SNV:-9A,-7G,-5A	0	0	0	0	0	0	0	0	0	0	2	0
SNV:-14C,-10A	0	0	0	0	0	0	0	0	0	0	1	1
SNV:-8G,-7C	0	0	0	0	0	0	0	0	0	0	1	1
SNV:-12A,-5A	0	0	0	0	0	0	0	0	0	0	1	1
SNV:-8G,4C	0	0	0	0	0	0	0	0	0	0	2	0
SNV:-13A,-12A,-11G,-10A,-9A,4G	1	0	0	0	0	0	0	0	0	0	0	0
SNV:-10G,-6A,-1C,1C	1	0	0	0	0	0	0	0	0	0	0	0
SNV:-5C,-1C,4G	1	0	0	0	0	0	0	0	0	0	0	0
SNV:-4C,4G	1	0	0	0	0	0	0	0	0	0	0	0
SNV:-4G,-2A,-1G,4A	1	0	0	0	0	0	0	0	0	0	0	0
SNV:-12A,-11G,-10A,-9A,4G	1	0	0	0	0	0	0	0	0	0	0	0
SNV:-13A,-12G	1	0	0	0	0	0	0	0	0	0	0	0
SNV:-15A,-13A,-12A,-7C,6C	1	0	0	0	0	0	0	0	0	0	0	0
SNV:-17C,-7T	1	0	0	0	0	0	0	0	0	0	0	0
SNV:-4C,-1C,2T	1	0	0	0	0	0	0	0	0	0	0	0
SNV:-9G,-4G,-3A,2T	1	0	0	0	0	0	0	0	0	0	0	0
SNV:-13T,-2C	1	0	0	0	0	0	0	0	0	0	0	0
SNV:-16G,-15A,-3A,-2G	1	0	0	0	0	0	0	0	0	0	0	0
SNV:-4G,4G	1	0	0	0	0	0	0	0	0	0	0	0
SNV:2C,4G,6C	1	0	0	0	0	0	0	0	0	0	0	0
SNV:-13A,-12A,3T,4C,5T,6T	1	0	0	0	0	0	0	0	0	0	0	0
SNV:-1C,1T,3T,5T,6T	1	0	0	0	0	0	0	0	0	0	0	0
SNV:3A,5T	1	0	0	0	0	0	0	0	0	0	0	0
SNV:-14C,-4G,-1G	1	0	0	0	0	0	0	0	0	0	0	0
SNV:-13T,2A	1	0	0	0	0	0	0	0	0	0	0	0
SNV:-12A,-10A,1T	1	0	0	0	0	0	0	0	0	0	0	0
SNV:-17T,-1G	1	0	0	0	0	0	0	0	0	0	0	0
SNV:-14C,-9A,4G	1	0	0	0	0	0	0	0	0	0	0	0
SNV:-2G,4C	1	0	0	0	0	0	0	0	0	0	0	0
SNV:-13T,-9A	1	0	0	0	0	0	0	0	0	0	0	0
SNV:-8C,-7C,-1C	1	0	0	0	0	0	0	0	0	0	0	0
SNV:-7T,-5A,-1G,4C	1	0	0	0	0	0	0	0	0	0	0	0
SNV:-8G,-3A,-1C,1T	1	0	0	0	0	0	0	0	0	0	0	0
SNV:-7G,-1C	1	0	0	0	0	0	0	0	0	0	0	0
SNV:3T,5C	1	0	0	0	0	0	0	0	0	0	0	0
SNV:-4C,2C,3C	1	0	0	0	0	0	0	0	0	0	0	0
SNV:-6A,2C	1	0	0	0	0	0	0	0	0	0	0	0
SNV:-16G,-11A,-1G	1	0	0	0	0	0	0	0	0	0	0	0
SNV:-16G,-14C	1	0	0	0	0	0	0	0	0	0	0	0
SNV:-7T,-5A	1	0	0	0	0	0	0	0	0	0	0	0
SNV:-13A,3T	1	0	0	0	0	0	0	0	0	0	0	0
SNV:-5C,-1T,3C	1	0	0	0	0	0	0	0	0	0	0	0
SNV:-17T,-1T,1A	1	0	0	0	0	0	0	0	0	0	0	0
SNV:-17T,-9T,1T,2T	1	0	0	0	0	0	0	0	0	0	0	0
SNV:-14C,-4C,-3A	1	0	0	0	0	0	0	0	0	0	0	0
SNV:-10A,6T	0	1	0	0	0	0	0	0	0	0	0	0
SNV:-7C,-6A,2C,4G	0	1	0	0	0	0	0	0	0	0	0	0
SNV:-16A,-13A	0	1	0	0	0	0	0	0	0	0	0	0
SNV:-15A,-12G	0	1	0	0	0	0	0	0	0	0	0	0
SNV:-12A,-2G,4G	0	1	0	0	0	0	0	0	0	0	0	0
SNV:-16C,-6A	0	1	0	0	0	0	0	0	0	0	0	0
SNV:-12A,4A	0	1	0	0	0	0	0	0	0	0	0	0
SNV:-8C,-3A	0	1	0	0	0	0	0	0	0	0	0	0
SNV:-16G,-14C,-8G,-7G,-6G,-5A	0	1	0	0	0	0	0	0	0	0	0	0
SNV:-15A,-12A	0	1	0	0	0	0	0	0	0	0	0	0
SNV:-7T,-6G,-5A	0	1	0	0	0	0	0	0	0	0	0	0
SNV:-11G,-6A	0	1	0	0	0	0	0	0	0	0	0	0
SNV:1A,3C,4C	0	1	0	0	0	0	0	0	0	0	0	0
SNV:1T,3C,5C	0	1	0	0	0	0	0	0	0	0	0	0
SNV:-3T,6T	0	1	0	0	0	0	0	0	0	0	0	0
SNV:-2A,-1T,1T,3T,4G	0	1	0	0	0	0	0	0	0	0	0	0
SNV:-14T,-8G	0	1	0	0	0	0	0	0	0	0	0	0
SNV:-9A,-8G,-6A	0	1	0	0	0	0	0	0	0	0	0	0
SNV:-13G,-12A,-7C,3T,5T	0	1	0	0	0	0	0	0	0	0	0	0
SNV:-11C,-10T	0	1	0	0	0	0	0	0	0	0	0	0
SNV:-17T,4G	0	1	0	0	0	0	0	0	0	0	0	0
SNV:-13G,-7T,-2G	0	1	0	0	0	0	0	0	0	0	0	0
SNV:-13A,-12A,5T,6T	0	1	0	0	0	0	0	0	0	0	0	0
SNV:-8G,-6C,-2A,3T,4G,6T	0	1	0	0	0	0	0	0	0	0	0	0
SNV:-5T,-3A	0	1	0	0	0	0	0	0	0	0	0	0
SNV:-17T,2T,6A	0	1	0	0	0	0	0	0	0	0	0	0
SNV:-11G,-6G,2C	0	0	1	0	0	0	0	0	0	0	0	0
SNV:-16G,-1C,1T,2C	0	0	1	0	0	0	0	0	0	0	0	0
SNV:-11C,4G	0	0	1	0	0	0	0	0	0	0	0	0
SNV:2A,4C	0	0	1	0	0	0	0	0	0	0	0	0
SNV:-14C,-5T,-2C	0	0	1	0	0	0	0	0	0	0	0	0
SNV:-2A,1T,3C,4G,5C	0	0	1	0	0	0	0	0	0	0	0	0
SNV:-16G,-12A,-1C,1T,2C	0	0	1	0	0	0	0	0	0	0	0	0
SNV:-13A,5T	0	0	1	0	0	0	0	0	0	0	0	0
SNV:-15A,-8C,-7C,-3A	0	0	1	0	0	0	0	0	0	0	0	0
SNV:3C,4C	0	0	1	0	0	0	0	0	0	0	0	0
SNV:-11G,-9A,-5C,-1G	0	0	1	0	0	0	0	0	0	0	0	0
SNV:-11A,-9G,-6G,-4G,4G,5A	0	0	1	0	0	0	0	0	0	0	0	0
SNV:-13G,-4T	0	0	1	0	0	0	0	0	0	0	0	0
SNV:-13T,2T	0	0	1	0	0	0	0	0	0	0	0	0
SNV:-16A,-8C	0	0	1	0	0	0	0	0	0	0	0	0
SNV:-14C,6A	0	0	1	0	0	0	0	0	0	0	0	0
SNV:-1C,1T,2C,4G	0	0	1	0	0	0	0	0	0	0	0	0
SNV:-16C,-7G	0	0	1	0	0	0	0	0	0	0	0	0
SNV:-4C,-3A	0	0	1	0	0	0	0	0	0	0	0	0
SNV:1A,5A	0	0	1	0	0	0	0	0	0	0	0	0
SNV:-17A,-16G,1T,2C	0	0	1	0	0	0	0	0	0	0	0	0
SNV:-14C,-7C	0	0	1	0	0	0	0	0	0	0	0	0
SNV:-11A,1T	0	0	1	0	0	0	0	0	0	0	0	0
SNV:-6G,5T	0	0	1	0	0	0	0	0	0	0	0	0
SNV:-13T,-8G	0	0	1	0	0	0	0	0	0	0	0	0
SNV:-7T,-5A,3T,4G	0	0	1	0	0	0	0	0	0	0	0	0
SNV:-1T,1T,2C	0	0	1	0	0	0	0	0	0	0	0	0
SNV:4A,5C	0	0	1	0	0	0	0	0	0	0	0	0
SNV:-11A,-1C	0	0	1	0	0	0	0	0	0	0	0	0
SNV:-16A,-14C	0	0	1	0	0	0	0	0	0	0	0	0
SNV:-15G,-14C,-4G	0	0	1	0	0	0	0	0	0	0	0	0
SNV:-14C,3T	0	0	1	0	0	0	0	0	0	0	0	0
SNV:-13G,-9A,-7G,-3G,2C	0	0	1	0	0	0	0	0	0	0	0	0
SNV:-12T,-11C	0	0	1	0	0	0	0	0	0	0	0	0
SNV:1C,2A,3C,4A	0	0	1	0	0	0	0	0	0	0	0	0
SNV:-8C,-1C,1T,2C	0	0	1	0	0	0	0	0	0	0	0	0
SNV:-6C,-1G,4G,5A	0	0	1	0	0	0	0	0	0	0	0	0
SNV:-14G,-1C,1T,2C	0	0	1	0	0	0	0	0	0	0	0	0
SNV:-8C,6T	0	0	1	0	0	0	0	0	0	0	0	0
SNV:-8G,-3A,-1C,1T,2C	0	0	1	0	0	0	0	0	0	0	0	0
SNV:-16G,-3A,4G	0	0	1	0	0	0	0	0	0	0	0	0
SNV:-11G,-1C,1T,2C	0	0	1	0	0	0	0	0	0	0	0	0
SNV:-17C,-8C,4C	0	0	1	0	0	0	0	0	0	0	0	0
SNV:-8C,-5C,4A	0	0	1	0	0	0	0	0	0	0	0	0
SNV:-16C,-12T,-3T	0	0	1	0	0	0	0	0	0	0	0	0
SNV:-1C,1T,2C,5T	0	0	1	0	0	0	0	0	0	0	0	0
SNV:-2G,-1G,4G	0	0	1	0	0	0	0	0	0	0	0	0
SNV:-6A,-1C,1T,2C	0	0	1	0	0	0	0	0	0	0	0	0
SNV:-11A,-7T	0	0	1	0	0	0	0	0	0	0	0	0
SNV:-8G,1T,2C	0	0	1	0	0	0	0	0	0	0	0	0
SNV:-5C,3C,4A	0	0	0	1	0	0	0	0	0	0	0	0
SNV:-16G,-13A,-7T	0	0	0	1	0	0	0	0	0	0	0	0
SNV:-4G,-1G	0	0	0	1	0	0	0	0	0	0	0	0
SNV:-12A,-11G,-10A	0	0	0	1	0	0	0	0	0	0	0	0
SNV:-12A,-10A,-9A	0	0	0	1	0	0	0	0	0	0	0	0
SNV:-8C,-7C,-3A	0	0	0	1	0	0	0	0	0	0	0	0
SNV:-2A,3A	0	0	0	1	0	0	0	0	0	0	0	0
SNV:-9G,-4G,4A	0	0	0	1	0	0	0	0	0	0	0	0
SNV:-9A,-5C	0	0	0	1	0	0	0	0	0	0	0	0
SNV:-13A,-7G	0	0	0	1	0	0	0	0	0	0	0	0
SNV:-10A,-9A,-7G,-5A	0	0	0	1	0	0	0	0	0	0	0	0
SNV:-11A,-4T	0	0	0	1	0	0	0	0	0	0	0	0
SNV:-15T,-13A,-5T,-3A,-1C,1A	0	0	0	1	0	0	0	0	0	0	0	0
SNV:-4T,4A	0	0	0	1	0	0	0	0	0	0	0	0
SNV:-14C,-13A,-12A	0	0	0	1	0	0	0	0	0	0	0	0
SNV:-15A,-13A,2T	0	0	0	1	0	0	0	0	0	0	0	0
SNV:-17T,-4G,-1T	0	0	0	1	0	0	0	0	0	0	0	0
SNV:-7C,-1C,1T	0	0	0	1	0	0	0	0	0	0	0	0
SNV:4G,6T	0	0	0	1	0	0	0	0	0	0	0	0
SNV:-17A,2T,5C	0	0	0	1	0	0	0	0	0	0	0	0
SNV:3A,4C	0	0	0	1	0	0	0	0	0	0	0	0
SNV:-13T,3C	0	0	0	1	0	0	0	0	0	0	0	0
SNV:-14C,2T,3T,4G	0	0	0	1	0	0	0	0	0	0	0	0
SNV:-7T,-2G	0	0	0	1	0	0	0	0	0	0	0	0
SNV:-13T,6A	0	0	0	1	0	0	0	0	0	0	0	0
SNV:-16G,-15A,-5T	0	0	0	1	0	0	0	0	0	0	0	0
SNV:-14C,-12T,-4T,-1C	0	0	0	1	0	0	0	0	0	0	0	0
SNV:-17C,-2C	0	0	0	1	0	0	0	0	0	0	0	0
SNV:-14C,-13A,-12A,-10A,-9A,-4G,4A	0	0	0	0	1	0	0	0	0	0	0	0
SNV:-15A,-12A,-6G,-1C,4G	0	0	0	0	1	0	0	0	0	0	0	0
SNV:2T,3T,5T,6T	0	0	0	0	1	0	0	0	0	0	0	0
SNV:-13A,-1C	0	0	0	0	1	0	0	0	0	0	0	0
SNV:-7C,-6G	0	0	0	0	1	0	0	0	0	0	0	0
SNV:-10A,-5A,6A	0	0	0	0	1	0	0	0	0	0	0	0
SNV:-16G,-8G,-7G,-6G,-5A,3A,6A	0	0	0	0	1	0	0	0	0	0	0	0
SNV:-14C,-4C	0	0	0	0	1	0	0	0	0	0	0	0
SNV:-1C,5C	0	0	0	0	1	0	0	0	0	0	0	0
SNV:-9A,-8G,-5A	0	0	0	0	1	0	0	0	0	0	0	0
SNV:1C,4A	0	0	0	0	1	0	0	0	0	0	0	0
SNV:-2A,-1T,3A,4A,6C	0	0	0	0	1	0	0	0	0	0	0	0
SNV:-5A,-3G,3A	0	0	0	0	1	0	0	0	0	0	0	0
SNV:-8C,-7C,-5C,3C	0	0	0	0	1	0	0	0	0	0	0	0
SNV:-5C,-2C	0	0	0	0	1	0	0	0	0	0	0	0
SNV:-3A,3A	0	0	0	0	1	0	0	0	0	0	0	0
SNV:-14C,-12A,-11G	0	0	0	0	1	0	0	0	0	0	0	0
SNV:-12G,-1T	0	0	0	0	1	0	0	0	0	0	0	0
SNV:-8G,-5A,3A	0	0	0	0	1	0	0	0	0	0	0	0
SNV:-10A,-6G,-3G	0	0	0	0	1	0	0	0	0	0	0	0
SNV:-10A,-5A,3A	0	0	0	0	1	0	0	0	0	0	0	0
SNV:-16G,-12A,-10A,-8G,-6G	0	0	0	0	1	0	0	0	0	0	0	0
SNV:-12G,-11A,-6A,-4G,3C	0	0	0	0	1	0	0	0	0	0	0	0
SNV:-10A,1T,6A	0	0	0	0	1	0	0	0	0	0	0	0
SNV:-16G,-12A,-10A,-9A,-7G,-5A	0	0	0	0	1	0	0	0	0	0	0	0
SNV:4C,5C	0	0	0	0	1	0	0	0	0	0	0	0
SNV:-5A,-2G	0	0	0	0	1	0	0	0	0	0	0	0
SNV:-12T,3A	0	0	0	0	1	0	0	0	0	0	0	0
SNV:-10A,-5A,-3G,3A	0	0	0	0	1	0	0	0	0	0	0	0
SNV:-17T,-10A,4A	0	0	0	0	1	0	0	0	0	0	0	0
SNV:-17T,-13A,-12A,4A	0	0	0	0	1	0	0	0	0	0	0	0
SNV:3T,6T	0	0	0	0	1	0	0	0	0	0	0	0
SNV:-15A,-12A,-11G	0	0	0	0	1	0	0	0	0	0	0	0
SNV:-16G,-4G,4A	0	0	0	0	1	0	0	0	0	0	0	0
SNV:-5A,6A	0	0	0	0	1	0	0	0	0	0	0	0
SNV:-5A,-2A	0	0	0	0	1	0	0	0	0	0	0	0
SNV:-9G,4G,5A,6T	0	0	0	0	1	0	0	0	0	0	0	0
SNV:-15T,2A	0	0	0	0	1	0	0	0	0	0	0	0
SNV:-17T,-7C,4A	0	0	0	0	1	0	0	0	0	0	0	0
SNV:-12T,-9T,4G,6A	0	0	0	0	1	0	0	0	0	0	0	0
SNV:-12A,-11G,4A	0	0	0	0	1	0	0	0	0	0	0	0
SNV:-16G,-12A,3A	0	0	0	0	1	0	0	0	0	0	0	0
SNV:-10A,-9A,-5A,3A,6A	0	0	0	0	1	0	0	0	0	0	0	0
SNV:-10A,-8G,-6G,-5A	0	0	0	0	1	0	0	0	0	0	0	0
SNV:-10T,3A,6A	0	0	0	0	1	0	0	0	0	0	0	0
SNV:1A,2A	0	0	0	0	1	0	0	0	0	0	0	0
SNV:-9A,-7G,-5A,3A	0	0	0	0	1	0	0	0	0	0	0	0
SNV:3C,4A	0	0	0	0	1	0	0	0	0	0	0	0
SNV:-8G,-7G,-6G,-5A	0	0	0	0	1	0	0	0	0	0	0	0
SNV:-7G,-3A,-1C	0	0	0	0	1	0	0	0	0	0	0	0
SNV:-8C,3A,4A	0	0	0	0	1	0	0	0	0	0	0	0
SNV:-4C,3T	0	0	0	0	1	0	0	0	0	0	0	0
SNV:-12T,-10G,-9A,-7G	0	0	0	0	1	0	0	0	0	0	0	0
SNV:-14C,-4T,3T	0	0	0	0	1	0	0	0	0	0	0	0
SNV:-9A,6A	0	0	0	0	1	0	0	0	0	0	0	0
SNV:-14C,-13A,-12A,-11G	0	0	0	0	1	0	0	0	0	0	0	0
SNV:-13A,-12A,4G	0	0	0	0	1	0	0	0	0	0	0	0
SNV:-12A,-10A,-8G,3A,6A	0	0	0	0	1	0	0	0	0	0	0	0
SNV:-6G,-4G	0	0	0	0	1	0	0	0	0	0	0	0
SNV:-17T,1T,2T,3T,6T	0	0	0	0	1	0	0	0	0	0	0	0
SNV:-17T,-8G,-7G	0	0	0	0	1	0	0	0	0	0	0	0
SNV:-14C,-2G	0	0	0	0	1	0	0	0	0	0	0	0
SNV:-12A,-10A,-7G,3A	0	0	0	0	1	0	0	0	0	0	0	0
SNV:-3A,3T	0	0	0	0	1	0	0	0	0	0	0	0
SNV:-14C,3T,4G	0	0	0	0	1	0	0	0	0	0	0	0
SNV:-17T,-7T	0	0	0	0	1	0	0	0	0	0	0	0
SNV:-7C,-4C	0	0	0	0	1	0	0	0	0	0	0	0
SNV:-14C,-8C,-7C,-6G,-4C,4G	0	0	0	0	1	0	0	0	0	0	0	0
SNV:-9T,-8T	0	0	0	0	1	0	0	0	0	0	0	0
SNV:-10A,-6G,3A	0	0	0	0	1	0	0	0	0	0	0	0
SNV:-8C,-5T	0	0	0	0	1	0	0	0	0	0	0	0
SNV:-8G,-3G,6A	0	0	0	0	1	0	0	0	0	0	0	0
SNV:-7G,5A	0	0	0	0	1	0	0	0	0	0	0	0
SNV:2C,3A	0	0	0	0	1	0	0	0	0	0	0	0
SNV:-13A,-5A,-1G,5T	0	0	0	0	1	0	0	0	0	0	0	0
SNV:-17T,-4T,3T	0	0	0	0	1	0	0	0	0	0	0	0
SNV:-15A,6T	0	0	0	0	1	0	0	0	0	0	0	0
SNV:-16G,-8G,-7G	0	0	0	0	1	0	0	0	0	0	0	0
SNV:-6A,-4T	0	0	0	0	1	0	0	0	0	0	0	0
SNV:-10A,-9A,-6G	0	0	0	0	1	0	0	0	0	0	0	0
SNV:-8G,3A,6A	0	0	0	0	1	0	0	0	0	0	0	0
SNV:-7T,-5C,-2C	0	0	0	0	1	0	0	0	0	0	0	0
SNV:-16G,-7G,-6G	0	0	0	0	1	0	0	0	0	0	0	0
SNV:-6G,1T	0	0	0	0	1	0	0	0	0	0	0	0
SNV:-17T,-16C,-2C	0	0	0	0	1	0	0	0	0	0	0	0
SNV:-14C,-8G	0	0	0	0	1	0	0	0	0	0	0	0
SNV:-16G,-8G,-7G,-5A	0	0	0	0	1	0	0	0	0	0	0	0
SNV:-4T,-1C	0	0	0	0	1	0	0	0	0	0	0	0
SNV:-14G,-7T	0	0	0	0	1	0	0	0	0	0	0	0
SNV:-14C,-2G,4A	0	0	0	0	1	0	0	0	0	0	0	0
SNV:-10A,-2G,4G	0	0	0	0	1	0	0	0	0	0	0	0
SNV:2A,3A	0	0	0	0	1	0	0	0	0	0	0	0
SNV:-12T,2T,3A	0	0	0	0	1	0	0	0	0	0	0	0
SNV:-5C,3A	0	0	0	0	1	0	0	0	0	0	0	0
SNV:1C,3A,4A	0	0	0	0	1	0	0	0	0	0	0	0
SNV:-13A,4C,5A	0	0	0	0	1	0	0	0	0	0	0	0
SNV:-16G,-9G	0	0	0	0	1	0	0	0	0	0	0	0
SNV:-16G,1T	0	0	0	0	1	0	0	0	0	0	0	0
SNV:-17T,-16G,-11G,-6G	0	0	0	0	1	0	0	0	0	0	0	0
SNV:-16A,1T	0	0	0	0	1	0	0	0	0	0	0	0
SNV:-13A,-9A	0	0	0	0	1	0	0	0	0	0	0	0
SNV:-17T,3C,4C	0	0	0	0	1	0	0	0	0	0	0	0
SNV:2C,3A,6A	0	0	0	0	1	0	0	0	0	0	0	0
SNV:-16G,-6G,-5T,3A	0	0	0	0	1	0	0	0	0	0	0	0
SNV:-14C,-10A,4G	0	0	0	0	1	0	0	0	0	0	0	0
SNV:-8T,4G	0	0	0	0	1	0	0	0	0	0	0	0
SNV:-14C,-6G	0	0	0	0	1	0	0	0	0	0	0	0
SNV:-14T,-4C,2A,4A	0	0	0	0	1	0	0	0	0	0	0	0
SNV:-12A,-10A,-5A	0	0	0	0	1	0	0	0	0	0	0	0
SNV:1T,3C	0	0	0	0	1	0	0	0	0	0	0	0
SNV:-12A,-9A,-6G	0	0	0	0	1	0	0	0	0	0	0	0
SNV:-16A,-3G,-2G,2T	0	0	0	0	1	0	0	0	0	0	0	0
SNV:-7G,-5C	0	0	0	0	1	0	0	0	0	0	0	0
SNV:-11G,-4T,4A	0	0	0	0	1	0	0	0	0	0	0	0
SNV:-12A,6A	0	0	0	0	1	0	0	0	0	0	0	0
SNV:-9A,2A	0	0	0	0	1	0	0	0	0	0	0	0
SNV:-17T,-8G	0	0	0	0	1	0	0	0	0	0	0	0
SNV:-12A,-4T	0	0	0	0	1	0	0	0	0	0	0	0
SNV:1T,3T,6T	0	0	0	0	1	0	0	0	0	0	0	0
SNV:-14C,-1G,1T	0	0	0	0	1	0	0	0	0	0	0	0
SNV:-8T,4A	0	0	0	0	1	0	0	0	0	0	0	0
SNV:-7T,-5A,4G,6T	0	0	0	0	1	0	0	0	0	0	0	0
SNV:-12A,-9A,1T,3A	0	0	0	0	1	0	0	0	0	0	0	0
SNV:-16G,5T	0	0	0	0	1	0	0	0	0	0	0	0
SNV:-17T,-3G,3A	0	0	0	0	1	0	0	0	0	0	0	0
SNV:-10T,-6G	0	0	0	0	1	0	0	0	0	0	0	0
SNV:-17T,-7C	0	0	0	0	1	0	0	0	0	0	0	0
SNV:-7T,-4C,-3A	0	0	0	0	1	0	0	0	0	0	0	0
SNV:-5T,4A,5T	0	0	0	0	1	0	0	0	0	0	0	0
SNV:-12G,4A	0	0	0	0	1	0	0	0	0	0	0	0
SNV:-10A,3A	0	0	0	0	1	0	0	0	0	0	0	0
SNV:3T,4A	0	0	0	0	1	0	0	0	0	0	0	0
SNV:4G,5T	0	0	0	0	1	0	0	0	0	0	0	0
SNV:-16G,-3G	0	0	0	0	1	0	0	0	0	0	0	0
SNV:-12A,-5C	0	0	0	0	1	0	0	0	0	0	0	0
SNV:-14T,-10A,-7C,1A	0	0	0	0	1	0	0	0	0	0	0	0
SNV:-4G,6C	0	0	0	0	1	0	0	0	0	0	0	0
SNV:-7G,-6G,1T	0	0	0	0	1	0	0	0	0	0	0	0
SNV:-7G,1T,3A	0	0	0	0	1	0	0	0	0	0	0	0
SNV:-9A,-5A,3A	0	0	0	0	1	0	0	0	0	0	0	0
SNV:-2C,-1C	0	0	0	0	1	0	0	0	0	0	0	0
SNV:-14C,-13A,-10T,4G	0	0	0	0	1	0	0	0	0	0	0	0
SNV:-8C,-7C,-5C,4C	0	0	0	0	1	0	0	0	0	0	0	0
SNV:-12G,-4C	0	0	0	0	0	1	0	0	0	0	0	0
SNV:-15A,-13G	0	0	0	0	0	1	0	0	0	0	0	0
SNV:-15G,-12A	0	0	0	0	0	1	0	0	0	0	0	0
SNV:-4C,-2C	0	0	0	0	0	1	0	0	0	0	0	0
SNV:-9G,-6G,-2C,4G	0	0	0	0	0	1	0	0	0	0	0	0
SNV:-15T,-13A	0	0	0	0	0	1	0	0	0	0	0	0
SNV:-8C,-5C,-3G	0	0	0	0	0	1	0	0	0	0	0	0
SNV:-7C,4G	0	0	0	0	0	1	0	0	0	0	0	0
SNV:-16G,4A	0	0	0	0	0	1	0	0	0	0	0	0
SNV:1A,2C	0	0	0	0	0	1	0	0	0	0	0	0
SNV:-13T,-7T	0	0	0	0	0	1	0	0	0	0	0	0
SNV:-12A,-8G,-6G,3A	0	0	0	0	0	1	0	0	0	0	0	0
SNV:-15A,-13A,-12A,5T	0	0	0	0	0	1	0	0	0	0	0	0
SNV:1C,5T,6A	0	0	0	0	0	1	0	0	0	0	0	0
SNV:-11A,-4C	0	0	0	0	0	1	0	0	0	0	0	0
SNV:-8C,-7C,1T,3T	0	0	0	0	0	1	0	0	0	0	0	0
SNV:-13A,-12A,3C	0	0	0	0	0	1	0	0	0	0	0	0
SNV:-16A,-6G	0	0	0	0	0	1	0	0	0	0	0	0
SNV:-15T,-8C,-3A,-2C	0	0	0	0	0	1	0	0	0	0	0	0
SNV:-5C,3C	0	0	0	0	0	1	0	0	0	0	0	0
SNV:1C,2A,4A	0	0	0	0	0	1	0	0	0	0	0	0
SNV:-12A,-10A,-5A,-2C,6T	0	0	0	0	0	1	0	0	0	0	0	0
SNV:-16G,-12A,-10T,-6G,-5A	0	0	0	0	0	1	0	0	0	0	0	0
SNV:-17C,-14C,-5A,-4G,-3G,1T	0	0	0	0	0	0	1	0	0	0	0	0
SNV:-13A,-12A,-10A	0	0	0	0	0	0	1	0	0	0	0	0
SNV:-11G,-6A,-3A,1C,2A,5C	0	0	0	0	0	0	1	0	0	0	0	0
SNV:-16A,-15G,-13G,-12A	0	0	0	0	0	0	1	0	0	0	0	0
SNV:-13A,-12A,-9A,4G	0	0	0	0	0	0	1	0	0	0	0	0
SNV:-16G,-13A,-7C	0	0	0	0	0	0	1	0	0	0	0	0
SNV:-13A,-10T	0	0	0	0	0	0	1	0	0	0	0	0
SNV:-15A,-8C,-7C,-5T	0	0	0	0	0	0	1	0	0	0	0	0
SNV:-17T,3C	0	0	0	0	0	0	1	0	0	0	0	0
SNV:3A,4A	0	0	0	0	0	0	1	0	0	0	0	0
SNV:-1C,2T	0	0	0	0	0	0	1	0	0	0	0	0
SNV:-10A,-2C	0	0	0	0	0	0	1	0	0	0	0	0
SNV:-17T,-14C,-8C	0	0	0	0	0	0	1	0	0	0	0	0
SNV:-7C,-5A,3C,4A	0	0	0	0	0	0	1	0	0	0	0	0
SNV:-16G,-7C	0	0	0	0	0	0	1	0	0	0	0	0
SNV:-13A,-5A,4A	0	0	0	0	0	0	1	0	0	0	0	0
SNV:-15T,-13A,-12T,5T,6T	0	0	0	0	0	0	1	0	0	0	0	0
SNV:-15T,-13T,-12A,-8T,-7T,5T	0	0	0	0	0	0	1	0	0	0	0	0
SNV:-13G,-12G,-9G,-7G,4G	0	0	0	0	0	0	1	0	0	0	0	0
SNV:-6A,4A	0	0	0	0	0	0	1	0	0	0	0	0
SNV:3C,6T	0	0	0	0	0	0	1	0	0	0	0	0
SNV:-14C,-2A	0	0	0	0	0	0	1	0	0	0	0	0
SNV:-6G,2C	0	0	0	0	0	0	1	0	0	0	0	0
SNV:1T,6T	0	0	0	0	0	0	0	1	0	0	0	0
SNV:-4C,-3T	0	0	0	0	0	0	0	1	0	0	0	0
SNV:-4G,-3A,4G,5T	0	0	0	0	0	0	0	1	0	0	0	0
SNV:-7T,-5A,6T	0	0	0	0	0	0	0	1	0	0	0	0
SNV:-8C,-7C,3C	0	0	0	0	0	0	0	1	0	0	0	0
SNV:2T,6T	0	0	0	0	0	0	0	1	0	0	0	0
SNV:-13A,-12A,-10A,-9A,4G	0	0	0	0	0	0	0	1	0	0	0	0
SNV:-4G,-1T	0	0	0	0	0	0	0	1	0	0	0	0
SNV:-6G,2C,4G	0	0	0	0	0	0	0	1	0	0	0	0
SNV:-1C,1A,2C	0	0	0	0	0	0	0	1	0	0	0	0
SNV:-8C,-5A,-3G	0	0	0	0	0	0	0	1	0	0	0	0
SNV:-12A,-9G,-4T,2T,3C	0	0	0	0	0	0	0	1	0	0	0	0
SNV:-10A,-2G,-1G	0	0	0	0	0	0	0	1	0	0	0	0
SNV:-13G,-12G	0	0	0	0	0	0	0	1	0	0	0	0
SNV:-6G,-2G,2C	0	0	0	0	0	0	0	1	0	0	0	0
SNV:-9G,-4G	0	0	0	0	0	0	0	1	0	0	0	0
SNV:-5A,4G	0	0	0	0	0	0	0	1	0	0	0	0
SNV:-12T,-6G	0	0	0	0	0	0	0	1	0	0	0	0
SNV:-13A,-10A,4G,6C	0	0	0	0	0	0	0	1	0	0	0	0
SNV:-13A,-12G,-11G,-10A,-2G	0	0	0	0	0	0	0	1	0	0	0	0
SNV:-17C,-14T	0	0	0	0	0	0	0	1	0	0	0	0
SNV:-16G,3T	0	0	0	0	0	0	0	1	0	0	0	0
SNV:-8G,3T	0	0	0	0	0	0	0	1	0	0	0	0
SNV:-8G,4A	0	0	0	0	0	0	0	1	0	0	0	0
SNV:-12A,2A	0	0	0	0	0	0	0	1	0	0	0	0
SNV:-11C,3T	0	0	0	0	0	0	0	1	0	0	0	0
SNV:-11G,-7G,2C	0	0	0	0	0	0	0	1	0	0	0	0
SNV:1T,2T	0	0	0	0	0	0	0	1	0	0	0	0
SNV:-16C,-11G,-5A,-1C,4G	0	0	0	0	0	0	0	1	0	0	0	0
SNV:-16C,-4C,4C	0	0	0	0	0	0	0	1	0	0	0	0
SNV:-13A,-8C,-5C	0	0	0	0	0	0	0	1	0	0	0	0
SNV:-17T,-13A,2T,3T,5T	0	0	0	0	0	0	0	1	0	0	0	0
SNV:-16G,-8C,-7C	0	0	0	0	0	0	0	1	0	0	0	0
SNV:-12G,-10G,-7G,4G	0	0	0	0	0	0	0	1	0	0	0	0
SNV:-14C,-12G,-11G,3T,4G,5T	0	0	0	0	0	0	0	1	0	0	0	0
SNV:-14C,-12A,-11G,4G	0	0	0	0	0	0	0	1	0	0	0	0
SNV:-5A,3T	0	0	0	0	0	0	0	1	0	0	0	0
SNV:-16G,-13A,-8T,-7T	0	0	0	0	0	0	0	1	0	0	0	0
SNV:-13T,-8T,-7T	0	0	0	0	0	0	0	1	0	0	0	0
SNV:-13A,-7C,6T	0	0	0	0	0	0	0	0	1	0	0	0
SNV:-15A,-12A,-8T,-7T	0	0	0	0	0	0	0	0	1	0	0	0
SNV:-10A,-9A,-8G	0	0	0	0	0	0	0	0	1	0	0	0
SNV:-2C,2A	0	0	0	0	0	0	0	0	1	0	0	0
SNV:2C,4G,5A	0	0	0	0	0	0	0	0	1	0	0	0
SNV:-15A,-7C	0	0	0	0	0	0	0	0	1	0	0	0
SNV:-13G,-9A	0	0	0	0	0	0	0	0	1	0	0	0
SNV:-17T,-16A,-7C,-5A,3C	0	0	0	0	0	0	0	0	1	0	0	0
SNV:-13T,-8T,-7C	0	0	0	0	0	0	0	0	1	0	0	0
SNV:-7G,-4G	0	0	0	0	0	0	0	0	1	0	0	0
SNV:-13A,-12A,-3A,5T	0	0	0	0	0	0	0	0	1	0	0	0
SNV:-11G,-2G,4C	0	0	0	0	0	0	0	0	1	0	0	0
SNV:-11A,-10G,-7G,-6G,-1G	0	0	0	0	0	0	0	0	1	0	0	0
SNV:-10A,1A	0	0	0	0	0	0	0	0	1	0	0	0
SNV:-8C,-7C,-1C,1T,2C	0	0	0	0	0	0	0	0	1	0	0	0
SNV:-13T,4A	0	0	0	0	0	0	0	0	1	0	0	0
SNV:-13A,-8T	0	0	0	0	0	0	0	0	1	0	0	0
SNV:-7T,-5A,4G	0	0	0	0	0	0	0	0	1	0	0	0
SNV:-14T,2T	0	0	0	0	0	0	0	0	1	0	0	0
SNV:-5C,-1G	0	0	0	0	0	0	0	0	1	0	0	0
SNV:-17A,-16C,-8G	0	0	0	0	0	0	0	0	1	0	0	0
SNV:-11A,-7T,-4C	0	0	0	0	0	0	0	0	1	0	0	0
SNV:-6G,2T	0	0	0	0	0	0	0	0	1	0	0	0
SNV:-8T,-3A	0	0	0	0	0	0	0	0	1	0	0	0
SNV:-16C,-13A	0	0	0	0	0	0	0	0	1	0	0	0
SNV:-13A,-8C	0	0	0	0	0	0	0	0	1	0	0	0
SNV:-2C,6A	0	0	0	0	0	0	0	0	1	0	0	0
SNV:-14C,-12A,4G	0	0	0	0	0	0	0	0	1	0	0	0
SNV:-11A,-9A	0	0	0	0	0	0	0	0	1	0	0	0
SNV:-9T,1T	0	0	0	0	0	0	0	0	1	0	0	0
SNV:-7T,3C	0	0	0	0	0	0	0	0	0	1	0	0
SNV:-11A,-4G,3T	0	0	0	0	0	0	0	0	0	1	0	0
SNV:-8C,-4T	0	0	0	0	0	0	0	0	0	1	0	0
SNV:-14C,-8C	0	0	0	0	0	0	0	0	0	1	0	0
SNV:-13A,-12A,-11G,-10A	0	0	0	0	0	0	0	0	0	1	0	0
SNV:-17C,4C	0	0	0	0	0	0	0	0	0	1	0	0
SNV:-16G,-15A,-7C,-3A	0	0	0	0	0	0	0	0	0	1	0	0
SNV:-1C,1T,3T	0	0	0	0	0	0	0	0	0	1	0	0
SNV:2T,3T,5T	0	0	0	0	0	0	0	0	0	1	0	0
SNV:-14C,2T,3T	0	0	0	0	0	0	0	0	0	1	0	0
SNV:-13G,-12G,-9A	0	0	0	0	0	0	0	0	0	1	0	0
SNV:-12G,-9A	0	0	0	0	0	0	0	0	0	1	0	0
SNV:-9G,-6G,-4C	0	0	0	0	0	0	0	0	0	1	0	0
SNV:-16G,-13A,-8G,-7G	0	0	0	0	0	0	0	0	0	1	0	0
SNV:-14C,-13A,-10A	0	0	0	0	0	0	0	0	0	1	0	0
SNV:-8G,-6A,1C	0	0	0	0	0	0	0	0	0	1	0	0
SNV:-9A,-8G	0	0	0	0	0	0	0	0	0	1	0	0
SNV:-6A,-4G	0	0	0	0	0	0	0	0	0	1	0	0
SNV:-14G,-8G,-6A	0	0	0	0	0	0	0	0	0	1	0	0
SNV:-16G,-12A,-7G	0	0	0	0	0	0	0	0	0	1	0	0
SNV:2T,4G	0	0	0	0	0	0	0	0	0	1	0	0
SNV:-5C,2A,3C	0	0	0	0	0	0	0	0	0	1	0	0
SNV:-12G,3T,4G,5T	0	0	0	0	0	0	0	0	0	1	0	0
SNV:-13A,4G,5T	0	0	0	0	0	0	0	0	0	1	0	0
SNV:-10G,-2G	0	0	0	0	0	0	0	0	0	1	0	0
SNV:-7T,-2C,4G	0	0	0	0	0	0	0	0	0	1	0	0
SNV:-12A,-11G,-4C,4G	0	0	0	0	0	0	0	0	0	1	0	0
SNV:2T,3T,4G,5C	0	0	0	0	0	0	0	0	0	1	0	0
SNV:-6G,-5T	0	0	0	0	0	0	0	0	0	1	0	0
SNV:-14C,4G,5T	0	0	0	0	0	0	0	0	0	1	0	0
SNV:-4C,-1C,4G	0	0	0	0	0	0	0	0	0	1	0	0
SNV:-13A,-12A,-11G	0	0	0	0	0	0	0	0	0	0	1	0
SNV:-8G,-7G,-5A,4G	0	0	0	0	0	0	0	0	0	0	1	0
SNV:-13A,-4G,1C	0	0	0	0	0	0	0	0	0	0	1	0
SNV:-16C,-14C,-12A,-8G	0	0	0	0	0	0	0	0	0	0	1	0
SNV:-10A,-7G,-5A	0	0	0	0	0	0	0	0	0	0	1	0
SNV:-16G,-6G,-3G,-2G	0	0	0	0	0	0	0	0	0	0	1	0
SNV:-7C,-6G,3A	0	0	0	0	0	0	0	0	0	0	1	0
SNV:-10A,-9A,-5A	0	0	0	0	0	0	0	0	0	0	1	0
SNV:4C,6C	0	0	0	0	0	0	0	0	0	0	1	0
SNV:-16G,-8C,-6G	0	0	0	0	0	0	0	0	0	0	1	0
SNV:-8G,-3G	0	0	0	0	0	0	0	0	0	0	1	0
SNV:1C,5C	0	0	0	0	0	0	0	0	0	0	1	0
SNV:-7G,-4T,-3A,4G	0	0	0	0	0	0	0	0	0	0	1	0
SNV:-13T,-7G,-2C,4A	0	0	0	0	0	0	0	0	0	0	1	0
SNV:-12T,-3T,-2A	0	0	0	0	0	0	0	0	0	0	1	0
SNV:-14C,-11G	0	0	0	0	0	0	0	0	0	0	1	0
SNV:-8G,-6G,-5A	0	0	0	0	0	0	0	0	0	0	1	0
SNV:-10A,-9A,6A	0	0	0	0	0	0	0	0	0	0	1	0
SNV:-14G,-11C,-9A,-8T,-7G,-3A,-2G,3A	0	0	0	0	0	0	0	0	0	0	1	0
SNV:-16G,-9A,-8G,-7G	0	0	0	0	0	0	0	0	0	0	1	0
SNV:-2G,3C	0	0	0	0	0	0	0	0	0	0	1	0
SNV:-7G,-3G,3A	0	0	0	0	0	0	0	0	0	0	1	0
SNV:-17T,2T	0	0	0	0	0	0	0	0	0	0	1	0
SNV:-12A,2C	0	0	0	0	0	0	0	0	0	0	1	0
SNV:-17T,-2A,-1G	0	0	0	0	0	0	0	0	0	0	1	0
SNV:-8C,-5A,-2C	0	0	0	0	0	0	0	0	0	0	1	0
SNV:-16G,-13T	0	0	0	0	0	0	0	0	0	0	1	0
SNV:-12T,-3T	0	0	0	0	0	0	0	0	0	0	1	0
SNV:-17T,1T,2T,3T	0	0	0	0	0	0	0	0	0	0	1	0
SNV:-16C,-1G	0	0	0	0	0	0	0	0	0	0	1	0
SNV:-8C,2T	0	0	0	0	0	0	0	0	0	0	1	0
SNV:-8G,1T	0	0	0	0	0	0	0	0	0	0	1	0
SNV:-17T,-2C	0	0	0	0	0	0	0	0	0	0	1	0
SNV:-7G,-2C	0	0	0	0	0	0	0	0	0	0	1	0
SNV:-11G,-10A,-9A,4A	0	0	0	0	0	0	0	0	0	0	1	0
SNV:-2A,4G	0	0	0	0	0	0	0	0	0	0	1	0
SNV:-17T,-14C,2T,3T,4G,5T	0	0	0	0	0	0	0	0	0	0	1	0
SNV:-15A,-12T	0	0	0	0	0	0	0	0	0	0	1	0
SNV:-17T,-3G	0	0	0	0	0	0	0	0	0	0	1	0
SNV:-17T,-16G,1T,6T	0	0	0	0	0	0	0	0	0	0	1	0
SNV:-8C,1T	0	0	0	0	0	0	0	0	0	0	1	0
SNV:-8G,-5A,-2G	0	0	0	0	0	0	0	0	0	0	1	0
SNV:-10A,-3A	0	0	0	0	0	0	0	0	0	0	1	0
SNV:-16G,-11G,-6G	0	0	0	0	0	0	0	0	0	0	1	0
SNV:-16G,-8T,-7C	0	0	0	0	0	0	0	0	0	0	1	0
SNV:-14C,-8C,-1C	0	0	0	0	0	0	0	0	0	0	1	0
SNV:-7G,4A	0	0	0	0	0	0	0	0	0	0	1	0
SNV:-15T,-8C	0	0	0	0	0	0	0	0	0	0	1	0
SNV:-6G,3T	0	0	0	0	0	0	0	0	0	0	1	0
SNV:-13A,-5T	0	0	0	0	0	0	0	0	0	0	1	0
SNV:-12A,-4G	0	0	0	0	0	0	0	0	0	0	1	0
SNV:-10A,-4G	0	0	0	0	0	0	0	0	0	0	1	0
SNV:-6G,-5A,6A	0	0	0	0	0	0	0	0	0	0	1	0
SNV:-8C,-5T,-2C	0	0	0	0	0	0	0	0	0	0	1	0
SNV:-15A,-8C	0	0	0	0	0	0	0	0	0	0	1	0
SNV:-8G,-7G,-2C	0	0	0	0	0	0	0	0	0	0	1	0
SNV:-14C,-13G,-10T	0	0	0	0	0	0	0	0	0	0	1	0
SNV:-5T,4C	0	0	0	0	0	0	0	0	0	0	1	0
SNV:-6C,-1C,1T,2C	0	0	0	0	0	0	0	0	0	0	0	1
SNV:-11C,-9A	0	0	0	0	0	0	0	0	0	0	0	1
SNV:-16G,4C	0	0	0	0	0	0	0	0	0	0	0	1
SNV:1C,2A,3A,4A,6A	0	0	0	0	0	0	0	0	0	0	0	1
SNV:-16G,-12A	0	0	0	0	0	0	0	0	0	0	0	1
SNV:-6A,-1C,4A	0	0	0	0	0	0	0	0	0	0	0	1
SNV:-10T,3C	0	0	0	0	0	0	0	0	0	0	0	1
SNV:-17T,-15T,-13T	0	0	0	0	0	0	0	0	0	0	0	1
SNV:-13G,-11G,-9G	0	0	0	0	0	0	0	0	0	0	0	1
SNV:-6G,4A	0	0	0	0	0	0	0	0	0	0	0	1
SNV:-12A,-3G	0	0	0	0	0	0	0	0	0	0	0	1
SNV:-14C,-2C	0	0	0	0	0	0	0	0	0	0	0	1
SNV:-13A,-2C	0	0	0	0	0	0	0	0	0	0	0	1
SNV:-17T,-14C,-12A,-11G,4G	0	0	0	0	0	0	0	0	0	0	0	1
SNV:-3T,-1C,1T,2C	0	0	0	0	0	0	0	0	0	0	0	1
SNV:-8C,-7C,-5T,-1C,6T	0	0	0	0	0	0	0	0	0	0	0	1
SNV:-17T,-8C	0	0	0	0	0	0	0	0	0	0	0	1
SNV:-17T,-3G,4C	0	0	0	0	0	0	0	0	0	0	0	1
-1:1D	5	181	806	1	132	120	1	59	219	1	63	213
1:1D	7	169	699	2	120	71	3	61	180	3	40	193
-1:1I	1	58	383	1	76	40	0	9	68	0	14	66
-2:2D	0	32	323	0	11	48	0	12	50	0	4	28
1:1I	0	36	241	0	26	63	0	5	41	0	8	39
-4:3D	0	39	186	0	17	16	0	26	45	0	5	10
-4:13D	1	69	107	0	31	10	0	45	13	0	21	37
-2:2I	0	43	138	0	53	14	1	0	21	0	13	38
1:7D	0	88	111	0	17	17	0	10	34	0	4	37
-3:10D	0	32	89	0	45	20	0	23	12	0	44	17
1:6D	0	26	71	0	13	25	0	18	29	0	3	25
-9:16D	0	46	54	0	21	10	0	18	21	0	13	19
-4:16D	0	53	39	0	12	5	0	24	20	0	16	8
5:1D	16	12	29	7	17	12	16	9	5	10	16	14
-14:23D	0	50	40	0	17	6	0	26	4	0	9	6
-4:4D	0	13	73	0	15	13	0	9	12	0	3	11
1:2D	0	27	43	0	15	0	0	22	15	0	8	13
-1:9D	0	17	86	1	4	2	0	8	1	1	5	15
-13:20D	0	31	54	0	0	1	0	13	9	0	21	10
-1:10D	0	42	45	0	20	8	0	6	4	0	6	7
-5:5D	0	5	70	0	23	5	0	12	10	0	9	1
-1:13D	1	15	30	1	24	6	0	13	12	0	4	25
-10:20D	0	19	29	0	29	3	0	11	7	0	11	15
-1:29I	0	0	79	0	16	8	0	0	2	0	0	9
-15:22D	0	19	35	0	22	3	0	5	2	0	1	6
-5:10D	0	15	18	0	11	11	0	14	1	0	3	13
1:2I	0	10	48	0	8	9	0	0	3	0	2	3
1:8D	0	7	24	0	8	4	0	7	23	0	0	6
5:20I	0	0	35	0	0	13	0	0	13	0	0	18
1:5D	0	9	43	0	2	0	0	0	13	0	1	7
-15:26D	0	15	28	0	15	4	0	2	0	0	4	3
1:39I	0	9	22	0	20	18	0	0	1	0	0	0
-1:2I	0	24	17	0	0	2	0	0	15	0	5	5
1:42I	0	11	39	0	6	7	0	0	4	0	0	0
1:40I	0	18	33	0	11	4	0	0	0	0	0	0
-10:17D	0	18	12	0	13	0	0	14	0	0	5	4
1:3D	0	4	34	0	1	0	0	5	8	0	2	6
-5:7D	0	17	6	0	2	6	0	8	1	0	16	4
-2:1I	0	10	27	0	3	11	0	0	8	0	0	0
-17:23D	0	8	22	0	7	1	0	3	11	0	0	6
-9:9D	0	18	32	0	0	1	0	0	0	0	1	6
-9:19D	0	11	19	0	0	0	0	11	10	0	0	6
-9:22D	0	10	9	0	11	4	0	5	9	0	2	7
-3:14D	0	5	17	0	0	2	0	16	15	0	0	1
-12:12D	0	10	15	0	3	1	0	2	16	0	5	3
-5:11D	0	2	21	0	16	3	0	4	8	0	1	0
-11:1D	6	3	1	6	9	13	3	2	4	0	2	4
-2:1D	0	3	17	0	8	0	0	11	1	3	2	8
1:38I	0	18	10	0	1	12	0	0	3	0	0	4
1:41I	0	3	20	0	11	4	0	0	2	0	0	7
-1:15D	0	25	10	0	4	0	0	0	0	0	0	7
-1:41I	0	16	22	0	8	0	0	0	0	0	0	0
1:11D	0	11	12	0	10	0	0	0	13	0	0	0
-17:22D	0	14	20	0	4	0	0	3	1	0	3	1
-1:2D	0	1	14	0	6	5	0	2	3	0	5	9
1:44I	0	5	4	0	8	17	0	0	2	0	8	0
-10:10D	0	5	25	0	0	0	0	9	4	0	1	0
-4:20D	0	3	11	0	10	7	0	0	0	0	12	0
-10:1D	5	4	1	2	5	5	5	7	0	1	1	5
-3:2D	0	11	15	0	9	3	0	0	1	0	0	2
1:14D	0	8	17	0	7	2	0	5	1	0	0	0
-12:22D	0	0	20	0	16	1	0	1	0	0	0	2
-17:17D	0	10	28	0	0	0	0	0	1	0	0	0
-11:11D	0	8	18	0	0	0	0	4	2	0	0	7
-1:45I	0	11	21	0	5	0	0	0	0	0	0	0
-10:21D	0	0	16	0	0	1	0	0	10	0	4	6
-4:3I	0	1	24	0	0	2	0	3	3	0	3	0
-1:42I	0	11	17	0	7	0	0	0	0	0	0	0
-6:9D	0	1	16	0	0	0	0	5	7	0	3	2
-12:19D	0	3	10	0	6	5	0	1	6	0	1	1
-14:30D	0	3	11	0	6	0	0	7	5	0	0	0
-9:18D	0	11	12	0	0	0	0	0	5	0	0	2
-2:11D	0	2	10	0	0	0	0	4	9	0	0	5
-6:13D	0	0	13	0	0	3	0	0	9	0	4	0
-5:6D	0	0	20	0	0	0	0	0	0	0	9	0
-1:4I	0	0	23	0	0	2	0	0	4	0	0	0
-4:14D	0	10	0	0	2	0	0	12	4	0	0	0
-8:17D	0	6	16	0	3	0	0	3	0	0	0	0
1:77I	0	12	2	0	7	0	0	0	0	0	0	6
-10:27D	0	1	13	0	0	0	0	4	6	0	0	3
1:72I	0	10	8	0	5	3	0	0	0	0	0	0
1:48I	0	13	4	0	3	6	0	0	0	0	0	0
-10:28D	0	10	2	0	5	0	0	0	6	0	3	0
-4:12D	0	0	13	0	12	0	0	0	1	0	0	0
-1:38I	1	10	11	0	1	2	0	0	0	0	0	0
1:71I	0	0	22	0	1	0	0	0	2	0	0	0
4:1D	1	2	8	0	2	2	2	0	3	0	1	3
-1:40I	0	10	7	0	0	7	0	0	0	0	0	0
1:64I	0	2	22	0	0	0	0	0	0	0	0	0
1:3I	0	6	9	0	0	0	0	0	5	0	0	4
1:9I	0	7	7	0	0	0	0	0	0	0	2	7
1:78I	0	10	3	0	0	0	0	0	8	0	2	0
3:5I	0	8	0	0	9	0	0	5	0	0	1	0
-1:43I	0	3	20	0	0	0	0	0	0	0	0	0
-2:70I	0	0	13	0	0	9	0	0	0	0	1	0
-1:6I	0	0	11	0	3	0	0	0	0	0	9	0
-17:19D	0	1	12	0	7	2	0	0	0	0	0	0
-1:21I	0	12	3	0	0	6	0	0	0	0	0	0
-1:48I	0	9	10	0	0	0	0	0	0	0	0	2
1:26I	0	11	0	0	0	10	0	0	0	0	0	0
1:37I	0	9	4	0	6	2	0	0	0	0	0	0
-2:43I	0	1	0	0	15	5	0	0	0	0	0	0
1:45I	0	7	5	0	0	0	0	0	6	0	0	3
-1:35I	0	0	10	1	1	9	0	0	0	0	0	0
1:43I	0	6	1	0	3	6	0	0	0	0	0	4
-11:20D	0	6	9	0	0	0	0	5	0	0	0	0
-14:14D	0	0	12	0	8	0	0	0	0	0	0	0
-15:12D	0	4	15	0	0	0	0	0	0	0	0	0
-2:5D	0	6	9	0	1	0	0	0	0	0	2	1
1:68I	0	9	2	0	0	3	0	0	5	0	0	0
-15:28D	0	6	3	0	1	3	0	0	3	0	3	0
-8:8D	0	1	5	0	10	2	0	0	1	0	0	0
-3:1D	0	2	17	0	0	0	0	0	0	0	0	0
-2:3I	0	0	10	0	0	2	0	0	7	0	0	0
-7:6D	0	0	4	0	0	3	0	0	12	0	0	0
-1:46I	0	0	11	0	8	0	0	0	0	0	0	0
-10:8D	0	14	1	0	0	0	0	0	0	0	3	0
-15:25D	0	6	5	0	0	1	0	2	4	0	0	0
-3:4D	0	2	7	0	0	0	0	6	0	0	0	3
-8:7D	0	7	8	0	0	1	0	0	2	0	0	0
1:84I	0	0	18	0	0	0	0	0	0	0	0	0
1:4D	0	0	14	0	0	0	0	0	0	0	0	4
-2:25I	0	0	2	0	11	0	0	0	0	0	0	5
-1:20D	0	0	5	0	8	0	0	3	0	0	0	2
-19:27D	0	4	11	0	0	0	0	0	0	0	2	0
-2:1I,-1:14D	0	11	6	0	0	0	0	0	0	0	0	0
1:67I	0	0	8	0	0	9	0	0	0	0	0	0
-1:30I	0	3	6	0	7	0	0	0	0	0	0	0
1:35I	0	16	0	0	0	0	0	0	0	0	0	0
-15:32D	0	5	2	0	5	0	0	0	0	0	4	0
-13:24D	0	12	4	0	0	0	0	0	0	0	0	0
1:28I	0	8	1	0	6	0	0	0	1	0	0	0
-5:27D	0	3	9	0	0	0	0	0	0	0	0	4
-15:15D	0	1	11	0	0	0	0	4	0	0	0	0
-10:23D	0	4	5	0	4	0	0	0	0	0	2	1
-1:50I	0	2	1	0	6	7	0	0	0	0	0	0
1:30I	0	0	3	0	11	2	0	0	0	0	0	0
-1:8D	0	0	10	0	0	0	0	0	0	0	0	6
-2:45I	0	9	6	0	0	0	0	0	0	0	0	0
-1:64I	0	15	0	0	0	0	0	0	0	0	0	0
1:73I	0	3	3	0	0	4	0	0	5	0	0	0
1:63I	0	11	2	0	0	2	0	0	0	0	0	0
1:47I	0	3	2	0	7	3	0	0	0	0	0	0
-14:13D	0	0	15	0	0	0	0	0	0	0	0	0
-11:18D	0	0	8	0	7	0	0	0	0	0	0	0
-20:26D	0	0	2	0	8	1	0	1	3	0	0	0
-13:19D	0	4	0	0	7	0	0	0	3	0	0	0
-2:41I	0	0	8	0	0	0	0	0	6	0	0	0
-13:21D	0	0	4	0	1	0	0	9	0	0	0	0
-28:27D	0	0	10	0	0	2	0	0	2	0	0	0
-1:59I	0	0	6	0	8	0	0	0	0	0	0	0
-1:23I	0	0	2	0	0	10	0	0	0	0	0	2
-2:18I,3:8I	0	0	0	0	14	0	0	0	0	0	0	0
-2:5I,3:3I	0	0	0	0	0	0	0	0	0	0	0	14
-1:39I	0	4	5	0	3	1	0	0	0	0	0	0
-1:11D	0	4	7	0	2	0	0	0	0	0	0	0
-7:9D	0	5	6	0	0	0	0	2	0	0	0	0
-15:30D	0	7	0	0	0	0	0	0	0	0	0	6
-4:18D	0	0	5	0	0	0	0	8	0	0	0	0
2:7D	0	0	12	0	0	0	0	0	0	0	0	1
1:4I	0	0	3	0	0	0	0	10	0	0	0	0
1:34I	0	0	12	0	0	1	0	0	0	0	0	0
1:79I	0	0	9	0	3	0	0	0	1	0	0	0
1:55I	0	0	8	0	5	0	0	0	0	0	0	0
-4:18I	0	0	0	0	13	0	0	0	0	0	0	0
-1:53I	0	0	0	0	6	5	0	0	2	0	0	0
-31:35D	0	3	7	0	2	0	0	0	0	0	0	0
-4:3D,3:3I	0	4	8	0	0	0	0	0	0	0	0	0
-14:21D	0	4	0	0	0	0	0	0	0	0	0	8
-2:17D	0	2	6	0	0	0	0	0	0	0	1	3
-3:41I	0	7	1	0	4	0	0	0	0	0	0	0
-8:9D	0	0	4	0	0	0	0	0	3	0	1	4
-4:2D	0	0	10	0	0	0	0	0	2	0	0	0
-2:5I	0	0	4	0	1	0	0	0	4	0	3	0
-1:44I	0	0	12	0	0	0	0	0	0	0	0	0
-7:21D	0	0	10	0	0	0	0	2	0	0	0	0
-1:6D	0	0	1	0	0	0	0	0	10	0	0	1
6:19I	0	0	3	0	0	0	0	0	5	0	0	4
-5:30I,-1:32I	0	0	0	0	12	0	0	0	0	0	0	0
-2:3D	0	6	5	0	0	0	0	0	0	0	0	0
-9:26D	0	8	0	0	0	0	0	3	0	0	0	0
-10:19D	0	2	5	0	0	0	0	0	0	0	0	4
1:80I	0	5	4	0	0	0	0	2	0	0	0	0
-2:48I	0	4	3	0	0	4	0	0	0	0	0	0
-14:20D	0	10	1	0	0	0	0	0	0	0	0	0
-2:42I	0	1	10	0	0	0	0	0	0	0	0	0
-10:7D	0	1	5	0	2	0	0	0	0	0	3	0
1:50I	0	3	0	0	0	3	0	4	1	0	0	0
-3:2I	0	0	11	0	0	0	0	0	0	0	0	0
-9:18I,-5:10I,-2:3I	0	0	11	0	0	0	0	0	0	0	0	0
-1:63I	0	0	2	0	7	2	0	0	0	0	0	0
1:85I	0	0	0	0	6	5	0	0	0	0	0	0
-25:34D	0	4	4	0	0	0	0	0	0	0	0	2
1:18D	0	5	2	0	0	0	0	1	0	0	0	2
-2:28I,-1:1D	0	10	0	0	0	0	0	0	0	0	0	0
-2:77I	0	10	0	0	0	0	0	0	0	0	0	0
-9:10D	0	6	3	0	0	1	0	0	0	0	0	0
-12:9D	0	3	2	0	2	3	0	0	0	0	0	0
-16:24D	0	4	6	0	0	0	0	0	0	0	0	0
-7:5D	0	10	0	0	0	0	0	0	0	0	0	0
-2:12D	0	6	0	0	0	0	0	0	4	0	0	0
-5:16D	0	5	1	0	0	4	0	0	0	0	0	0
-1:52I	0	0	10	0	0	0	0	0	0	0	0	0
-1:7D	0	0	7	0	0	0	0	0	0	0	0	3
-7:15D	0	0	7	0	2	0	0	1	0	0	0	0
1:81I	0	0	6	0	0	4	0	0	0	0	0	0
-3:5D	0	0	4	0	0	0	0	0	6	0	0	0
-8:18I,-5:9I,-2:21I,1:25I	0	0	0	0	10	0	0	0	0	0	0	0
-14:10D	0	6	3	0	0	0	0	0	0	0	0	0
-1:3D	0	6	3	0	0	0	0	0	0	0	0	0
-3:21I	0	9	0	0	0	0	0	0	0	0	0	0
-7:14D	0	5	0	0	2	0	0	0	0	0	0	2
-1:69I	0	0	7	0	0	0	0	2	0	0	0	0
-4:13I	0	0	9	0	0	0	0	0	0	0	0	0
-11:17D	0	0	9	0	0	0	0	0	0	0	0	0
-1:16D	0	0	7	0	0	0	0	2	0	0	0	0
-19:33D	0	0	7	0	0	0	0	2	0	0	0	0
-2:2I,-1:4D	0	0	9	0	0	0	0	0	0	0	0	0
-1:24I	0	0	7	0	0	0	0	0	2	0	0	0
-15:21D	0	0	0	0	9	0	0	0	0	0	0	0
-1:24I,3:20I	0	0	0	0	9	0	0	0	0	0	0	0
-8:4D	0	0	0	0	5	0	0	0	0	0	0	4
-13:19I,-7:4I,-2:14I	0	0	0	0	9	0	0	0	0	0	0	0
-1:7I,3:26I,4:1D	0	0	0	0	9	0	0	0	0	0	0	0
-3:45I	0	0	0	0	0	9	0	0	0	0	0	0
-1:28I	0	0	0	0	0	7	0	0	2	0	0	0
-5:17D	0	0	0	0	0	0	0	0	0	0	9	0
-5:13D	0	4	4	0	0	0	0	0	0	0	0	0
1:30I,5:6I	0	8	0	0	0	0	0	0	0	0	0	0
-2:4I,-1:1D	0	4	0	0	0	0	0	1	0	0	3	0
-1:66I	0	3	2	0	0	0	0	0	0	0	0	3
1:61I	0	2	6	0	0	0	0	0	0	0	0	0
-11:14D	0	2	0	0	4	0	0	0	0	0	2	0
-19:28D	0	1	5	0	0	2	0	0	0	0	0	0
1:29I	0	4	4	0	0	0	0	0	0	0	0	0
5:17I	0	0	8	0	0	0	0	0	0	0	0	0
-19:19D	0	0	8	0	0	0	0	0	0	0	0	0
-1:22I	0	0	4	0	0	1	0	0	0	0	0	3
-3:3I	0	0	7	0	1	0	0	0	0	0	0	0
-7:13D	0	0	6	0	0	2	0	0	0	0	0	0
1:12I,3:2I	0	0	8	0	0	0	0	0	0	0	0	0
-2:7I,-1:1D	0	0	8	0	0	0	0	0	0	0	0	0
-2:19I	0	0	8	0	0	0	0	0	0	0	0	0
-15:42D	0	0	7	0	0	0	0	0	0	0	1	0
-1:34I	0	0	3	0	5	0	0	0	0	0	0	0
-2:36I	0	0	2	0	0	0	0	0	0	0	6	0
-32:32D	0	0	4	0	0	2	0	0	2	0	0	0
1:60I	0	0	8	0	0	0	0	0	0	0	0	0
-2:37I	0	0	6	0	2	0	0	0	0	0	0	0
-2:53I	0	0	8	0	0	0	0	0	0	0	0	0
-1:3I	0	0	7	0	0	0	0	0	0	0	1	0
-13:20I,-7:2D,1:2I	0	0	8	0	0	0	0	0	0	0	0	0
1:12D	0	0	5	0	0	0	0	0	0	0	0	3
-2:4D	0	0	3	0	0	4	0	0	1	0	0	0
-13:11D,3:6I	0	0	0	0	8	0	0	0	0	0	0	0
-1:18D	0	0	0	0	5	0	0	3	0	0	0	0
-7:8D	0	0	0	0	8	0	0	0	0	0	0	0
-5:7D,6:17D	0	0	0	0	0	0	0	8	0	0	0	0
-11:7I,-7:2D	0	0	0	0	0	0	0	0	8	0	0	0
1:21I	0	0	0	0	0	0	0	0	0	0	8	0
-8:1D	2	0	1	0	1	0	0	0	1	2	0	0
1:66I	0	3	3	0	0	0	0	1	0	0	0	0
-2:4I,-1:1D,4:2I	0	7	0	0	0	0	0	0	0	0	0	0
1:7I	0	2	0	0	0	0	0	5	0	0	0	0
-16:27D	0	5	0	0	1	0	0	1	0	0	0	0
-1:78I	0	1	6	0	0	0	0	0	0	0	0	0
-13:32D	0	1	4	0	0	2	0	0	0	0	0	0
-2:71I	0	7	0	0	0	0	0	0	0	0	0	0
1:54I	0	4	3	0	0	0	0	0	0	0	0	0
-2:1I,3:3I	0	0	7	0	0	0	0	0	0	0	0	0
-13:11D	0	0	7	0	0	0	0	0	0	0	0	0
-15:16D	0	0	7	0	0	0	0	0	0	0	0	0
-5:38I	0	0	7	0	0	0	0	0	0	0	0	0
1:12I,3:51I	0	0	7	0	0	0	0	0	0	0	0	0
-10:31D	0	0	7	0	0	0	0	0	0	0	0	0
-1:36I	0	0	1	0	0	4	0	0	0	0	2	0
1:59I	0	0	7	0	0	0	0	0	0	0	0	0
5:1I	0	0	4	0	0	0	0	0	0	0	0	3
-32:37D	0	0	3	0	3	0	0	1	0	0	0	0
-30:30D	0	0	5	0	0	2	0	0	0	0	0	0
-32:38D	0	0	3	0	0	0	0	0	4	0	0	0
4:4I,6:9I	0	0	7	0	0	0	0	0	0	0	0	0
-15:2D	0	0	1	0	0	1	0	1	2	2	0	0
-24:31D	0	0	1	0	0	0	0	0	3	0	0	3
-11:16D	0	0	1	0	0	0	0	0	0	0	0	6
-2:1I,-1:3D	0	0	0	0	7	0	0	0	0	0	0	0
-1:79I	0	0	0	0	7	0	0	0	0	0	0	0
3:11D	0	0	0	0	7	0	0	0	0	0	0	0
-2:79I	0	0	0	0	1	0	0	6	0	0	0	0
-9:8D	0	0	0	0	0	0	0	0	5	0	0	2
-2:44I	0	5	1	0	0	0	0	0	0	0	0	0
-21:31D	0	2	4	0	0	0	0	0	0	0	0	0
2:10I,5:5D	0	6	0	0	0	0	0	0	0	0	0	0
-15:34D	0	2	0	0	0	0	0	3	0	0	0	1
-24:35D	0	4	1	0	0	0	0	0	0	0	0	1
-16:15D	0	6	0	0	0	0	0	0	0	0	0	0
-3:4I	0	5	1	0	0	0	0	0	0	0	0	0
3:4I	0	2	1	0	0	0	0	0	3	0	0	0
-1:77I	0	2	4	0	0	0	0	0	0	0	0	0
1:75I	0	2	0	0	0	0	0	4	0	0	0	0
-3:8D	0	2	0	0	0	4	0	0	0	0	0	0
-5:3D	0	0	6	0	0	0	0	0	0	0	0	0
-24:15D,-5:5D,4:2I	0	0	6	0	0	0	0	0	0	0	0	0
-25:33D	0	0	6	0	0	0	0	0	0	0	0	0
-1:24I,4:2I	0	0	1	0	0	0	0	0	5	0	0	0
-1:17D	0	0	6	0	0	0	0	0	0	0	0	0
-31:31D	0	0	1	0	2	0	0	0	1	0	0	2
-2:6D	0	0	6	0	0	0	0	0	0	0	0	0
1:36I	0	0	3	0	3	0	0	0	0	0	0	0
-10:11D	0	0	6	0	0	0	0	0	0	0	0	0
1:11I,4:12D	0	0	6	0	0	0	0	0	0	0	0	0
-15:13D	0	0	6	0	0	0	0	0	0	0	0	0
-1:81I	0	0	6	0	0	0	0	0	0	0	0	0
1:49I	0	0	6	0	0	0	0	0	0	0	0	0
-1:57I	0	0	1	0	5	0	0	0	0	0	0	0
-8:23D	0	0	3	0	0	2	0	0	0	0	0	1
-2:7I	0	0	0	0	6	0	0	0	0	0	0	0
-5:12D	0	0	0	0	6	0	0	0	0	0	0	0
-19:19D,3:2I	0	0	0	0	6	0	0	0	0	0	0	0
-1:6I,1:4D	0	0	0	0	6	0	0	0	0	0	0	0
-2:18I,-1:3D	0	0	0	0	6	0	0	0	0	0	0	0
-21:41D	0	0	0	0	0	6	0	0	0	0	0	0
-13:3I,-1:2I	0	0	0	0	0	6	0	0	0	0	0	0
-12:1I,-7:10I,-5:24I,-1:11I	0	0	0	0	0	0	0	6	0	0	0	0
-2:9I,-1:1D	0	0	0	0	0	0	0	6	0	0	0	0
-2:22I	0	0	0	0	0	0	0	6	0	0	0	0
-2:7D	0	0	0	0	0	0	0	5	1	0	0	0
-2:9D	0	0	0	0	0	0	0	5	0	0	0	1
-15:28I,-13:4D,-5:3I,3:8I	0	0	0	0	0	0	0	6	0	0	0	0
-2:1D,1:3I	0	0	0	0	0	0	0	6	0	0	0	0
-2:12I,-1:6D	0	0	0	0	0	0	0	0	6	0	0	0
-2:5I,-1:1D	0	0	0	0	0	0	0	0	1	0	0	5
-4:49I	0	0	0	0	0	0	0	0	0	0	6	0
-2:12I,-1:1D	0	5	0	0	0	0	0	0	0	0	0	0
-4:44I	0	5	0	0	0	0	0	0	0	0	0	0
-20:25D	0	5	0	0	0	0	0	0	0	0	0	0
-12:33D	0	5	0	0	0	0	0	0	0	0	0	0
-9:23I	0	5	0	0	0	0	0	0	0	0	0	0
-4:10I,-2:1D,1:26I	0	5	0	0	0	0	0	0	0	0	0	0
-16:5I,-4:3D	0	5	0	0	0	0	0	0	0	0	0	0
-2:2I,-1:3D	0	5	0	0	0	0	0	0	0	0	0	0
-18:21D	0	3	1	0	1	0	0	0	0	0	0	0
-2:6I	0	4	1	0	0	0	0	0	0	0	0	0
1:27D	0	2	3	0	0	0	0	0	0	0	0	0
-23:32D	0	1	0	0	0	0	0	4	0	0	0	0
-8:24I,-6:1D,1:4I	0	5	0	0	0	0	0	0	0	0	0	0
-3:46I	0	5	0	0	0	0	0	0	0	0	0	0
-4:1I	0	5	0	0	0	0	0	0	0	0	0	0
-13:7I,-9:2D,-1:65I	0	5	0	0	0	0	0	0	0	0	0	0
-2:1I,-1:4D	0	5	0	0	0	0	0	0	0	0	0	0
-2:74I	0	5	0	0	0	0	0	0	0	0	0	0
-3:22D	0	0	5	0	0	0	0	0	0	0	0	0
-3:9D	0	0	3	0	0	0	0	2	0	0	0	0
1:31I	0	0	5	0	0	0	0	0	0	0	0	0
6:1I	0	0	5	0	0	0	0	0	0	0	0	0
3:29I	0	0	5	0	0	0	0	0	0	0	0	0
1:19D	0	0	5	0	0	0	0	0	0	0	0	0
-26:37D	0	0	5	0	0	0	0	0	0	0	0	0
-3:19I	0	0	5	0	0	0	0	0	0	0	0	0
-2:34I	0	0	5	0	0	0	0	0	0	0	0	0
-17:9D,-6:5D	0	0	5	0	0	0	0	0	0	0	0	0
-35:41D	0	0	5	0	0	0	0	0	0	0	0	0
-16:16D	0	0	3	0	0	0	0	0	0	0	0	2
-2:1I,3:8I	0	0	5	0	0	0	0	0	0	0	0	0
-2:58I	0	0	5	0	0	0	0	0	0	0	0	0
-1:31I	0	0	5	0	0	0	0	0	0	0	0	0
-6:4D	0	0	5	0	0	0	0	0	0	0	0	0
-3:2I,3:3I	0	0	5	0	0	0	0	0	0	0	0	0
-6:1D	0	0	4	0	0	0	0	0	0	0	0	1
2:13D	0	0	2	0	0	3	0	0	0	0	0	0
-2:4I,3:24I	0	0	5	0	0	0	0	0	0	0	0	0
-15:20D	0	0	2	0	0	0	0	0	3	0	0	0
-1:16I	0	0	5	0	0	0	0	0	0	0	0	0
-10:29D	0	0	5	0	0	0	0	0	0	0	0	0
-11:10D	0	0	0	0	5	0	0	0	0	0	0	0
-2:1I,-1:7D	0	0	0	0	5	0	0	0	0	0	0	0
-9:5I,-4:3D	0	0	0	0	5	0	0	0	0	0	0	0
-1:32I	0	0	0	0	5	0	0	0	0	0	0	0
4:15I	0	0	0	0	5	0	0	0	0	0	0	0
-4:12I	0	0	0	0	0	5	0	0	0	0	0	0
-1:9I	0	0	0	0	0	5	0	0	0	0	0	0
-15:31D	0	0	0	0	0	0	0	5	0	0	0	0
-2:6I,3:3I	0	0	0	0	0	0	0	5	0	0	0	0
-14:7I,-10:10I,-1:18I	0	0	0	0	0	0	0	5	0	0	0	0
-6:12D	0	0	0	0	0	0	0	0	5	0	0	0
-2:1I,-1:8D	0	0	0	0	0	0	0	0	5	0	0	0
-1:71I	0	0	0	0	0	0	0	0	5	0	0	0
-17:25D	0	0	0	0	0	0	0	0	5	0	0	0
1:12I,3:8I	0	0	0	0	0	0	0	0	0	0	5	0
-13:3D,-1:2D	0	0	0	0	0	0	0	0	0	0	5	0
-15:2D,-3:6I,1:9I	0	0	0	0	0	0	0	0	0	0	5	0
6:14D	0	0	0	0	0	0	0	0	0	0	5	0
1:3D,5:13I	0	0	0	0	0	0	0	0	0	0	0	5
-3:14I	0	0	0	0	0	0	0	0	0	0	0	5
-1:4I,4:16I	0	0	0	0	0	0	0	0	0	0	0	5
2:3D	1	0	0	0	0	0	0	0	3	0	0	0
-10:5I,-2:6I	0	4	0	0	0	0	0	0	0	0	0	0
-7:8I,1:10I	0	4	0	0	0	0	0	0	0	0	0	0
-1:65I	0	2	1	0	1	0	0	0	0	0	0	0
-2:1I,-1:20D	0	4	0	0	0	0	0	0	0	0	0	0
-2:8I	0	4	0	0	0	0	0	0	0	0	0	0
-2:80I	0	1	3	0	0	0	0	0	0	0	0	0
-11:21D	0	2	1	0	1	0	0	0	0	0	0	0
-17:31D	0	4	0	0	0	0	0	0	0	0	0	0
-1:15I	0	4	0	0	0	0	0	0	0	0	0	0
-10:22D	0	2	0	0	0	0	0	1	1	0	0	0
-21:28D	0	2	2	0	0	0	0	0	0	0	0	0
-4:27I,-1:7I	0	4	0	0	0	0	0	0	0	0	0	0
-1:12D	0	3	1	0	0	0	0	0	0	0	0	0
-18:22D	0	3	1	0	0	0	0	0	0	0	0	0
-16:30D	0	0	4	0	0	0	0	0	0	0	0	0
-14:33I,-4:29I	0	0	4	0	0	0	0	0	0	0	0	0
-12:8I,-8:8I,-1:37I	0	0	4	0	0	0	0	0	0	0	0	0
-2:46I	0	0	4	0	0	0	0	0	0	0	0	0
-31:29D	0	0	4	0	0	0	0	0	0	0	0	0
-1:26I	0	0	4	0	0	0	0	0	0	0	0	0
-15:1D,-4:12I	0	0	4	0	0	0	0	0	0	0	0	0
-12:9I,-10:20I,-6:10I,-3:15I,1:8I	0	0	4	0	0	0	0	0	0	0	0	0
-17:15D	0	0	4	0	0	0	0	0	0	0	0	0
1:1I,6:36I	0	0	4	0	0	0	0	0	0	0	0	0
-2:33I	0	0	2	0	1	0	0	0	0	0	0	1
-1:6I,3:2I	0	0	4	0	0	0	0	0	0	0	0	0
-1:67I	0	0	4	0	0	0	0	0	0	0	0	0
-27:33D	0	0	4	0	0	0	0	0	0	0	0	0
-1:20I	0	0	4	0	0	0	0	0	0	0	0	0
-14:29D	0	0	2	0	0	2	0	0	0	0	0	0
-3:68I	0	0	4	0	0	0	0	0	0	0	0	0
-2:31I	0	0	4	0	0	0	0	0	0	0	0	0
-19:31D	0	0	3	0	0	1	0	0	0	0	0	0
-3:84I	0	0	4	0	0	0	0	0	0	0	0	0
-3:44I	0	0	4	0	0	0	0	0	0	0	0	0
1:56I	0	0	4	0	0	0	0	0	0	0	0	0
2:1I	0	0	4	0	0	0	0	0	0	0	0	0
-2:11I	0	0	4	0	0	0	0	0	0	0	0	0
-3:40I	0	0	4	0	0	0	0	0	0	0	0	0
-13:1D,-7:6D	0	0	4	0	0	0	0	0	0	0	0	0
-8:1I	0	0	2	0	0	0	0	2	0	0	0	0
-10:33I,-2:27I	0	0	0	0	4	0	0	0	0	0	0	0
-5:6D,6:7D	0	0	0	0	4	0	0	0	0	0	0	0
-7:3D,1:1I	0	0	0	0	4	0	0	0	0	0	0	0
-2:69I	0	0	0	0	4	0	0	0	0	0	0	0
-1:1D,2:4I	0	0	0	0	0	4	0	0	0	0	0	0
3:42I,6:7I	0	0	0	0	0	4	0	0	0	0	0	0
1:12I,2:3D	0	0	0	0	0	0	0	4	0	0	0	0
-17:32D	0	0	0	0	0	0	0	3	0	0	0	1
-1:29D	0	0	0	0	0	0	0	4	0	0	0	0
-18:17D	0	0	0	0	0	0	0	0	3	0	1	0
-1:24I,2:4I	0	0	0	0	0	0	0	0	4	0	0	0
-18:16D	0	0	0	0	0	0	0	0	4	0	0	0
-13:27D	0	0	0	0	0	0	0	0	1	0	3	0
-2:3I,-1:1D	0	0	0	0	0	0	0	0	0	0	4	0
-25:37D	0	0	0	0	0	0	0	0	0	0	4	0
-11:6I,-5:17I,-1:4I	0	0	0	0	0	0	0	0	0	0	4	0
1:19I	0	0	0	0	0	0	0	0	0	0	4	0
-18:25D	0	0	0	0	0	0	0	0	0	0	2	2
-1:7I	0	0	0	0	0	0	0	0	0	0	0	4
1:25I	0	0	0	0	0	0	0	0	0	0	0	4
-1:29I,6:25I	0	0	0	0	0	0	0	0	0	0	0	4
-2:8I,-1:6D	0	0	0	0	0	0	0	0	0	0	0	4
1:26I,4:8I	0	0	0	0	0	0	0	0	0	0	0	4
-5:6D,6:9I	0	3	0	0	0	0	0	0	0	0	0	0
-4:22D	0	3	0	0	0	0	0	0	0	0	0	0
-3:43I,-1:2I	0	3	0	0	0	0	0	0	0	0	0	0
-16:9D,-5:5D	0	3	0	0	0	0	0	0	0	0	0	0
-19:18D	0	2	0	0	0	0	0	0	1	0	0	0
1:46I	0	2	1	0	0	0	0	0	0	0	0	0
-3:74I	0	3	0	0	0	0	0	0	0	0	0	0
-24:15D,-4:4D	0	3	0	0	0	0	0	0	0	0	0	0
-13:18D	0	2	1	0	0	0	0	0	0	0	0	0
-1:37I	0	2	1	0	0	0	0	0	0	0	0	0
1:83I	0	1	2	0	0	0	0	0	0	0	0	0
-3:80I	0	3	0	0	0	0	0	0	0	0	0	0
1:51I	0	1	0	0	0	2	0	0	0	0	0	0
-1:49I	0	1	0	0	0	1	0	0	0	0	0	1
-20:44D	0	3	0	0	0	0	0	0	0	0	0	0
-14:16D	0	3	0	0	0	0	0	0	0	0	0	0
1:82I	0	3	0	0	0	0	0	0	0	0	0	0
-1:74I	0	3	0	0	0	0	0	0	0	0	0	0
-2:13I,-1:1D	0	3	0	0	0	0	0	0	0	0	0	0
-2:4I,3:2I	0	3	0	0	0	0	0	0	0	0	0	0
-4:51I,4:2I	0	0	3	0	0	0	0	0	0	0	0	0
-12:25D	0	0	1	0	0	0	0	0	0	0	0	2
2:10I,6:54I	0	0	3	0	0	0	0	0	0	0	0	0
-7:10I,-3:3I,-2:1D	0	0	3	0	0	0	0	0	0	0	0	0
-1:3D,5:1I	0	0	3	0	0	0	0	0	0	0	0	0
-1:8I,3:22I	0	0	3	0	0	0	0	0	0	0	0	0
-25:53D	0	0	3	0	0	0	0	0	0	0	0	0
-38:38D	0	0	3	0	0	0	0	0	0	0	0	0
-21:34D	0	0	3	0	0	0	0	0	0	0	0	0
-2:8D	0	0	3	0	0	0	0	0	0	0	0	0
-1:19I	0	0	1	0	0	0	0	0	0	0	0	2
-4:20I	0	0	3	0	0	0	0	0	0	0	0	0
-2:38I	0	0	3	0	0	0	0	0	0	0	0	0
-20:20D	0	0	3	0	0	0	0	0	0	0	0	0
-2:29I	0	0	3	0	0	0	0	0	0	0	0	0
-2:17I	0	0	3	0	0	0	0	0	0	0	0	0
-5:24D	0	0	1	0	0	0	0	0	0	0	0	2
1:62I	0	0	2	0	0	0	0	0	1	0	0	0
-1:24I,3:29I	0	0	3	0	0	0	0	0	0	0	0	0
2:6I	0	0	3	0	0	0	0	0	0	0	0	0
-5:18D	0	0	3	0	0	0	0	0	0	0	0	0
-32:42D	0	0	3	0	0	0	0	0	0	0	0	0
-1:24I,3:3I	0	0	3	0	0	0	0	0	0	0	0	0
-1:24I,1:1D	0	0	3	0	0	0	0	0	0	0	0	0
-39:37D	0	0	3	0	0	0	0	0	0	0	0	0
-25:41D	0	0	1	0	0	0	0	0	0	0	0	2
-33:36D	0	0	2	0	0	0	0	0	0	0	1	0
-3:21D	0	0	2	0	0	0	0	0	0	0	1	0
-14:1D	0	0	1	0	1	0	1	0	0	0	0	0
-35:50D	0	0	3	0	0	0	0	0	0	0	0	0
-2:26I	0	0	3	0	0	0	0	0	0	0	0	0
6:7I	0	0	3	0	0	0	0	0	0	0	0	0
3:2D	0	0	3	0	0	0	0	0	0	0	0	0
-3:2I,2:1I	0	0	3	0	0	0	0	0	0	0	0	0
-8:13D	0	0	3	0	0	0	0	0	0	0	0	0
1:33I	0	0	1	0	0	0	0	0	0	0	2	0
-2:1D,4:40I	0	0	3	0	0	0	0	0	0	0	0	0
-5:14D	0	0	3	0	0	0	0	0	0	0	0	0
-13:1D	0	0	1	0	0	0	0	0	1	0	1	0
-15:8D,-4:3D	0	0	2	0	0	0	0	0	1	0	0	0
-1:72I	0	0	2	0	0	0	0	0	1	0	0	0
1:30I,6:31I	0	0	3	0	0	0	0	0	0	0	0	0
-15:15D,3:2I	0	0	0	0	3	0	0	0	0	0	0	0
1:16I	0	0	0	0	3	0	0	0	0	0	0	0
-32:56D	0	0	0	0	3	0	0	0	0	0	0	0
-26:42D	0	0	0	0	3	0	0	0	0	0	0	0
-17:24D	0	0	0	0	3	0	0	0	0	0	0	0
-4:40I	0	0	0	0	3	0	0	0	0	0	0	0
-27:31D	0	0	0	0	3	0	0	0	0	0	0	0
-26:36D	0	0	0	0	3	0	0	0	0	0	0	0
-1:55I	0	0	0	0	2	1	0	0	0	0	0	0
-1:26I,2:11I,5:31I	0	0	0	0	0	3	0	0	0	0	0	0
5:6D	0	0	0	0	0	2	0	0	1	0	0	0
-12:11D	0	0	0	0	0	3	0	0	0	0	0	0
-12:13I,-9:16I,1:30I	0	0	0	0	0	3	0	0	0	0	0	0
-2:23I	0	0	0	0	0	3	0	0	0	0	0	0
-2:16I,-1:3D	0	0	0	0	0	0	0	3	0	0	0	0
-3:18I	0	0	0	0	0	0	0	3	0	0	0	0
-4:3D,3:2I	0	0	0	0	0	0	0	3	0	0	0	0
-4:4I	0	0	0	0	0	0	0	0	3	0	0	0
-1:18I	0	0	0	0	0	0	0	0	3	0	0	0
-1:24I,3:24I	0	0	0	0	0	0	0	0	3	0	0	0
-1:58I,2:20I	0	0	0	0	0	0	0	0	3	0	0	0
-8:15D	0	0	0	0	0	0	0	0	3	0	0	0
-2:1I,2:9D	0	0	0	0	0	0	0	0	3	0	0	0
-26:35D	0	0	0	0	0	0	0	0	3	0	0	0
-6:13I,-3:19I	0	0	0	0	0	0	0	0	3	0	0	0
-3:8I	0	0	0	0	0	0	0	0	3	0	0	0
1:64I,6:9I	0	0	0	0	0	0	0	0	0	0	3	0
-2:76I	0	0	0	0	0	0	0	0	0	0	3	0
-4:8D	0	0	0	0	0	0	0	0	0	0	3	0
-2:1I,-1:6D	0	0	0	0	0	0	0	0	0	0	0	3
2:8D	0	0	0	0	0	0	0	0	0	0	0	3
-2:11I,3:8I	0	0	0	0	0	0	0	0	0	0	0	3
-1:28I,3:6I	0	0	0	0	0	0	0	0	0	0	0	3
-28:36D	0	0	0	0	0	0	0	0	0	0	0	3
-1:84I	0	0	0	0	0	0	0	0	0	0	0	3
-2:5I,3:11I	0	0	0	0	0	0	0	0	0	0	0	3
-1:24I,3:6I	0	0	0	0	0	0	0	0	0	0	0	3
-26:26D	0	0	0	0	0	0	0	0	0	0	0	3
-19:32D	0	0	0	0	0	0	0	0	0	0	0	3
-4:4D,3:2I	0	2	0	0	0	0	0	0	0	0	0	0
-4:4D,3:3I	0	2	0	0	0	0	0	0	0	0	0	0
6:9I	0	2	0	0	0	0	0	0	0	0	0	0
-1:33I,5:12I	0	2	0	0	0	0	0	0	0	0	0	0
-27:41D	0	2	0	0	0	0	0	0	0	0	0	0
-6:7D,5:1D	0	2	0	0	0	0	0	0	0	0	0	0
-2:1I,2:7D	0	2	0	0	0	0	0	0	0	0	0	0
-12:10I,-6:53I	0	2	0	0	0	0	0	0	0	0	0	0
-3:4D,5:1D	0	2	0	0	0	0	0	0	0	0	0	0
-4:19D	0	2	0	0	0	0	0	0	0	0	0	0
-20:27D	0	1	0	0	0	0	0	0	1	0	0	0
-26:48D	0	2	0	0	0	0	0	0	0	0	0	0
-2:8I,3:4I	0	2	0	0	0	0	0	0	0	0	0	0
-5:1D	0	1	0	0	0	1	0	0	0	0	0	0
-12:2I,-5:31I	0	2	0	0	0	0	0	0	0	0	0	0
-5:18I,1:21I	0	2	0	0	0	0	0	0	0	0	0	0
-2:35I	0	2	0	0	0	0	0	0	0	0	0	0
-12:13D	0	2	0	0	0	0	0	0	0	0	0	0
-16:28D	0	1	0	0	0	0	0	0	0	0	1	0
-4:14I,1:5D	0	2	0	0	0	0	0	0	0	0	0	0
-16:29D	0	1	0	0	0	0	0	0	0	0	1	0
-1:24I,3:19I	0	0	2	0	0	0	0	0	0	0	0	0
2:54I	0	0	2	0	0	0	0	0	0	0	0	0
-14:15I,-12:1I,-9:43I	0	0	2	0	0	0	0	0	0	0	0	0
-2:40I	0	0	2	0	0	0	0	0	0	0	0	0
-1:11I,3:20I,6:6I	0	0	2	0	0	0	0	0	0	0	0	0
-1:83I	0	0	2	0	0	0	0	0	0	0	0	0
-4:12I,-2:1D	0	0	2	0	0	0	0	0	0	0	0	0
-15:27D	0	0	2	0	0	0	0	0	0	0	0	0
-1:5I	0	0	2	0	0	0	0	0	0	0	0	0
-16:5D,-4:3D	0	0	2	0	0	0	0	0	0	0	0	0
-14:24D	0	0	2	0	0	0	0	0	0	0	0	0
-1:76I	0	0	2	0	0	0	0	0	0	0	0	0
-21:42D	0	0	2	0	0	0	0	0	0	0	0	0
4:35I	0	0	2	0	0	0	0	0	0	0	0	0
1:65I	0	0	2	0	0	0	0	0	0	0	0	0
-14:11D,-1:11D	0	0	2	0	0	0	0	0	0	0	0	0
-9:34I,-3:5I,1:7D	0	0	2	0	0	0	0	0	0	0	0	0
-15:1D	0	0	2	0	0	0	0	0	0	0	0	0
-14:11D,-1:19D	0	0	2	0	0	0	0	0	0	0	0	0
1:52I	0	0	1	0	0	0	0	0	1	0	0	0
-7:18D	0	0	2	0	0	0	0	0	0	0	0	0
-2:13I,-1:3D	0	0	2	0	0	0	0	0	0	0	0	0
-2:3I,-1:1D,5:1D	0	0	2	0	0	0	0	0	0	0	0	0
-14:15D	0	0	2	0	0	0	0	0	0	0	0	0
1:3I,4:11I	0	0	2	0	0	0	0	0	0	0	0	0
-2:28I	0	0	2	0	0	0	0	0	0	0	0	0
-7:21I,-3:1I,-1:12I	0	0	2	0	0	0	0	0	0	0	0	0
-15:23D	0	0	1	0	0	0	0	1	0	0	0	0
-1:4D	0	0	2	0	0	0	0	0	0	0	0	0
-17:42D	0	0	2	0	0	0	0	0	0	0	0	0
5:19I	0	0	2	0	0	0	0	0	0	0	0	0
-5:2D	0	0	2	0	0	0	0	0	0	0	0	0
-13:34I,-9:6D	0	0	2	0	0	0	0	0	0	0	0	0
1:32I	0	0	2	0	0	0	0	0	0	0	0	0
-2:24I,-1:1D	0	0	2	0	0	0	0	0	0	0	0	0
-12:27D	0	0	2	0	0	0	0	0	0	0	0	0
-1:85I	0	0	2	0	0	0	0	0	0	0	0	0
-1:10I	0	0	2	0	0	0	0	0	0	0	0	0
-8:2D,-1:1D	0	0	2	0	0	0	0	0	0	0	0	0
-9:34D	0	0	2	0	0	0	0	0	0	0	0	0
-1:25I	0	0	1	0	0	0	0	0	0	0	0	1
-36:43D	0	0	2	0	0	0	0	0	0	0	0	0
-10:25D	0	0	2	0	0	0	0	0	0	0	0	0
-5:1I,-3:6I,-1:7D	0	0	2	0	0	0	0	0	0	0	0	0
5:13I	0	0	2	0	0	0	0	0	0	0	0	0
-1:27I	0	0	2	0	0	0	0	0	0	0	0	0
-1:7I,3:6I,5:19I	0	0	0	0	2	0	0	0	0	0	0	0
-21:32D	0	0	0	0	2	0	0	0	0	0	0	0
-17:30D	0	0	0	0	1	1	0	0	0	0	0	0
4:42I	0	0	0	0	2	0	0	0	0	0	0	0
-11:15I,-8:2D,-2:18I	0	0	0	0	2	0	0	0	0	0	0	0
-12:16D	0	0	0	0	2	0	0	0	0	0	0	0
-2:7I,-1:3D	0	0	0	0	0	2	0	0	0	0	0	0
-1:73I	0	0	0	0	0	2	0	0	0	0	0	0
-20:21D	0	0	0	0	0	1	0	1	0	0	0	0
-2:66I	0	0	0	0	0	2	0	0	0	0	0	0
-10:1D,-2:71I	0	0	0	0	0	2	0	0	0	0	0	0
-3:52I	0	0	0	0	0	2	0	0	0	0	0	0
-16:7D,-7:15D	0	0	0	0	0	0	0	2	0	0	0	0
-5:19D	0	0	0	0	0	0	0	2	0	0	0	0
-17:18D	0	0	0	0	0	0	0	2	0	0	0	0
-18:29D	0	0	0	0	0	0	0	2	0	0	0	0
-2:16I,3:3I	0	0	0	0	0	0	0	2	0	0	0	0
-3:7D	0	0	0	0	0	0	0	2	0	0	0	0
5:4D	0	0	0	0	0	0	0	0	2	0	0	0
-4:2I,1:5D	0	0	0	0	0	0	0	0	2	0	0	0
-7:19D	0	0	0	0	0	0	0	0	0	0	2	0
-2:6I,-1:1D	0	0	0	0	0	0	0	0	0	0	2	0
-14:11D,-1:8D	0	0	0	0	0	0	0	0	0	0	2	0
-15:36D	0	0	0	0	0	0	0	0	0	0	2	0
3:7I	0	0	0	0	0	0	0	0	0	0	2	0
-10:27I,-3:21I,-1:2I	0	0	0	0	0	0	0	0	0	0	2	0
-3:30D	0	0	0	0	0	0	0	0	0	0	0	2
-5:34D	0	0	0	0	0	0	0	0	0	0	0	2
-7:9I,3:13I	0	0	0	0	0	0	0	0	0	0	0	2
-13:14D	0	0	0	0	0	0	0	0	0	0	0	2
-23:22D	0	0	0	0	0	0	0	0	0	0	0	2
2:16I	0	0	0	0	0	0	0	0	0	0	0	2
6:6I	0	0	0	0	0	0	0	0	0	0	0	2
-2:12I,-1:3D	0	0	0	0	0	0	0	0	0	0	0	2
1:3I,4:2I	0	1	0	0	0	0	0	0	0	0	0	0
-3:6I,-1:2D	0	1	0	0	0	0	0	0	0	0	0	0
-19:38D	0	1	0	0	0	0	0	0	0	0	0	0
-2:8I,-1:7D	0	1	0	0	0	0	0	0	0	0	0	0
-18:32D	0	1	0	0	0	0	0	0	0	0	0	0
-1:75I	0	1	0	0	0	0	0	0	0	0	0	0
-14:4I,-13:4D	0	1	0	0	0	0	0	0	0	0	0	0
-2:27I	0	1	0	0	0	0	0	0	0	0	0	0
1:76I	0	1	0	0	0	0	0	0	0	0	0	0
-4:21D	0	1	0	0	0	0	0	0	0	0	0	0
-4:51I,3:7I	0	1	0	0	0	0	0	0	0	0	0	0
1:27I	0	1	0	0	0	0	0	0	0	0	0	0
-1:33I,5:19I	0	1	0	0	0	0	0	0	0	0	0	0
-2:4I	0	1	0	0	0	0	0	0	0	0	0	0
2:10I,5:7I,6:3D	0	1	0	0	0	0	0	0	0	0	0	0
-3:1I,-2:4D	0	1	0	0	0	0	0	0	0	0	0	0
-3:83I	0	1	0	0	0	0	0	0	0	0	0	0
-4:61I,1:6I	0	1	0	0	0	0	0	0	0	0	0	0
-3:6D	0	1	0	0	0	0	0	0	0	0	0	0
-15:3D,-6:2D,-1:17I	0	1	0	0	0	0	0	0	0	0	0	0
-10:2I	0	1	0	0	0	0	0	0	0	0	0	0
-3:60I	0	1	0	0	0	0	0	0	0	0	0	0
-6:9I,1:68I	0	1	0	0	0	0	0	0	0	0	0	0
-25:15D,3:24I	0	0	1	0	0	0	0	0	0	0	0	0
1:7I,6:16D	0	0	1	0	0	0	0	0	0	0	0	0
1:21I,5:22I	0	0	1	0	0	0	0	0	0	0	0	0
-2:52I	0	0	1	0	0	0	0	0	0	0	0	0
-27:32D	0	0	1	0	0	0	0	0	0	0	0	0
-6:2D	0	0	1	0	0	0	0	0	0	0	0	0
-12:8I,-7:2D,-2:2D	0	0	1	0	0	0	0	0	0	0	0	0
-12:7D,-2:11I	0	0	1	0	0	0	0	0	0	0	0	0
-9:6I,-3:11I,-1:14I	0	0	1	0	0	0	0	0	0	0	0	0
-13:40D	0	0	1	0	0	0	0	0	0	0	0	0
1:18I	0	0	1	0	0	0	0	0	0	0	0	0
-18:4D	0	0	1	0	0	0	0	0	0	0	0	0
-22:29D	0	0	1	0	0	0	0	0	0	0	0	0
-24:51D	0	0	1	0	0	0	0	0	0	0	0	0
-1:4I,4:14I	0	0	1	0	0	0	0	0	0	0	0	0
-37:55D	0	0	1	0	0	0	0	0	0	0	0	0
-1:24I,2:19I	0	0	1	0	0	0	0	0	0	0	0	0
-11:26D	0	0	1	0	0	0	0	0	0	0	0	0
6:17D	0	0	1	0	0	0	0	0	0	0	0	0
-4:2I	0	0	1	0	0	0	0	0	0	0	0	0
-4:61I	0	0	1	0	0	0	0	0	0	0	0	0
-1:30D	0	0	1	0	0	0	0	0	0	0	0	0
2:35I,6:1I	0	0	1	0	0	0	0	0	0	0	0	0
1:53I	0	0	1	0	0	0	0	0	0	0	0	0
-12:6I,-7:2D,-2:8I	0	0	1	0	0	0	0	0	0	0	0	0
-44:58D	0	0	1	0	0	0	0	0	0	0	0	0
-1:68I	0	0	1	0	0	0	0	0	0	0	0	0
-32:34D	0	0	1	0	0	0	0	0	0	0	0	0
-12:18D	0	0	1	0	0	0	0	0	0	0	0	0
-2:26I,3:15I	0	0	1	0	0	0	0	0	0	0	0	0
-47:53D	0	0	1	0	0	0	0	0	0	0	0	0
-12:8D	0	0	1	0	0	0	0	0	0	0	0	0
-6:10D	0	0	1	0	0	0	0	0	0	0	0	0
-2:6I,-1:4D	0	0	1	0	0	0	0	0	0	0	0	0
3:10D	0	0	1	0	0	0	0	0	0	0	0	0
1:26I,3:3I	0	0	1	0	0	0	0	0	0	0	0	0
-1:60I	0	0	1	0	0	0	0	0	0	0	0	0
3:47I	0	0	1	0	0	0	0	0	0	0	0	0
-1:36I,3:6I	0	0	1	0	0	0	0	0	0	0	0	0
-12:20I,-7:2D,1:2I	0	0	1	0	0	0	0	0	0	0	0	0
-14:8D,-4:3D	0	0	1	0	0	0	0	0	0	0	0	0
-3:81I	0	0	1	0	0	0	0	0	0	0	0	0
-1:24I,3:39I	0	0	1	0	0	0	0	0	0	0	0	0
-9:18I,-7:2D,-2:15I	0	0	1	0	0	0	0	0	0	0	0	0
-4:1D	0	0	1	0	0	0	0	0	0	0	0	0
1:69I	0	0	1	0	0	0	0	0	0	0	0	0
-2:54I	0	0	1	0	0	0	0	0	0	0	0	0
-3:55I,2:6I	0	0	1	0	0	0	0	0	0	0	0	0
-3:4D,6:3I	0	0	1	0	0	0	0	0	0	0	0	0
-1:10I,5:4I	0	0	1	0	0	0	0	0	0	0	0	0
-17:28D	0	0	1	0	0	0	0	0	0	0	0	0
-1:7I,3:4I,5:21I	0	0	0	0	1	0	0	0	0	0	0	0
-7:25I	0	0	0	0	1	0	0	0	0	0	0	0
-10:2D,-4:2I	0	0	0	0	1	0	0	0	0	0	0	0
-2:11I,-1:3D	0	0	0	0	1	0	0	0	0	0	0	0
2:4I	0	0	0	0	1	0	0	0	0	0	0	0
-4:12I,3:6I	0	0	0	0	1	0	0	0	0	0	0	0
-1:34I,5:12I	0	0	0	0	1	0	0	0	0	0	0	0
-13:37I	0	0	0	0	1	0	0	0	0	0	0	0
2:15D	0	0	0	0	1	0	0	0	0	0	0	0
-1:1D,5:1D	0	0	0	0	1	0	0	0	0	0	0	0
-5:2I,-2:1D,4:1D	0	0	0	0	1	0	0	0	0	0	0	0
-4:16I,-1:2I	0	0	0	0	1	0	0	0	0	0	0	0
-19:35D	0	0	0	0	1	0	0	0	0	0	0	0
-21:23D	0	0	0	0	1	0	0	0	0	0	0	0
-15:15D,3:4I	0	0	0	0	1	0	0	0	0	0	0	0
-4:7I,-2:12D	0	0	0	0	1	0	0	0	0	0	0	0
2:10D	0	0	0	0	1	0	0	0	0	0	0	0
-2:57I	0	0	0	0	1	0	0	0	0	0	0	0
-5:58I,-2:5I,-1:1D	0	0	0	0	1	0	0	0	0	0	0	0
-3:69I	0	0	0	0	0	1	0	0	0	0	0	0
-1:21D	0	0	0	0	0	1	0	0	0	0	0	0
-1:1D,2:5I	0	0	0	0	0	1	0	0	0	0	0	0
-16:1I,-3:2D	0	0	0	0	0	1	0	0	0	0	0	0
-22:8D,-11:7D	0	0	0	0	0	1	0	0	0	0	0	0
-40:39D	0	0	0	0	0	0	0	1	0	0	0	0
-42:48D	0	0	0	0	0	0	0	1	0	0	0	0
-16:2D,-5:3I,-3:1D	0	0	0	0	0	0	0	1	0	0	0	0
-1:8I,1:3D	0	0	0	0	0	0	0	1	0	0	0	0
-1:3I,4:2I	0	0	0	0	0	0	0	1	0	0	0	0
-12:1I,-7:10I,-4:24I,-1:11I	0	0	0	0	0	0	0	1	0	0	0	0
-11:24I,-5:3I,-2:8I	0	0	0	0	0	0	0	1	0	0	0	0
-4:4D,4:1I	0	0	0	0	0	0	0	1	0	0	0	0
-4:62I,1:1I	0	0	0	0	0	0	0	1	0	0	0	0
-21:47D	0	0	0	0	0	0	0	1	0	0	0	0
-12:15D	0	0	0	0	0	0	0	1	0	0	0	0
-10:33D	0	0	0	0	0	0	0	1	0	0	0	0
-4:24D	0	0	0	0	0	0	0	1	0	0	0	0
-39:44D	0	0	0	0	0	0	0	1	0	0	0	0
-1:7I,1:7D	0	0	0	0	0	0	0	1	0	0	0	0
4:1I	0	0	0	0	0	0	0	0	1	0	0	0
-2:29I,-1:1D	0	0	0	0	0	0	0	0	1	0	0	0
6:11I	0	0	0	0	0	0	0	0	1	0	0	0
-3:17I	0	0	0	0	0	0	0	0	1	0	0	0
-15:6D,-4:13D	0	0	0	0	0	0	0	0	1	0	0	0
-1:1I,1:6D	0	0	0	0	0	0	0	0	1	0	0	0
-2:64I	0	0	0	0	0	0	0	0	1	0	0	0
-36:52D	0	0	0	0	0	0	0	0	1	0	0	0
-10:24D	0	0	0	0	0	0	0	0	1	0	0	0
-16:5D,-1:9D	0	0	0	0	0	0	0	0	1	0	0	0
-8:1D,-2:24I	0	0	0	0	0	0	0	0	1	0	0	0
1:25I,4:7I	0	0	0	0	0	0	0	0	0	1	0	0
-6:38D	0	0	0	0	0	0	0	0	0	0	1	0
-13:31D	0	0	0	0	0	0	0	0	0	0	1	0
-1:1I,4:6D	0	0	0	0	0	0	0	0	0	0	1	0
-2:13I,2:7I	0	0	0	0	0	0	0	0	0	0	1	0
-13:4D,-5:5D	0	0	0	0	0	0	0	0	0	0	1	0
-11:22I,-8:5I	0	0	0	0	0	0	0	0	0	0	1	0
-14:1D,-9:2I,-6:2D,1:14I	0	0	0	0	0	0	0	0	0	0	1	0
-4:3D,6:8I	0	0	0	0	0	0	0	0	0	0	1	0
1:58I,3:3I,5:5I	0	0	0	0	0	0	0	0	0	0	1	0
-18:3D,-14:10I,-6:14D	0	0	0	0	0	0	0	0	0	0	1	0
-2:1D,3:2D	0	0	0	0	0	0	0	0	0	0	1	0
-5:42I	0	0	0	0	0	0	0	0	0	0	1	0
-2:1I,2:15D	0	0	0	0	0	0	0	0	0	0	1	0
-28:37D	0	0	0	0	0	0	0	0	0	0	1	0
-2:1D,3:3I	0	0	0	0	0	0	0	0	0	0	1	0
-9:51I,-5:10I,1:4I	0	0	0	0	0	0	0	0	0	0	1	0
-10:1I,-6:12I,-1:37I	0	0	0	0	0	0	0	0	0	0	1	0
1:74I	0	0	0	0	0	0	0	0	0	0	0	1
-2:9I	0	0	0	0	0	0	0	0	0	0	0	1
-15:9D,-4:3D	0	0	0	0	0	0	0	0	0	0	0	1
-2:8I,-1:1D	0	0	0	0	0	0	0	0	0	0	0	1
-8:40I	0	0	0	0	0	0	0	0	0	0	0	1
-9:6D	0	0	0	0	0	0	0	0	0	0	0	1
-3:22I	0	0	0	0	0	0	0	0	0	0	0	1
-1:33I	0	0	0	0	0	0	0	0	0	0	0	1
-12:21D	0	0	0	0	0	0	0	0	0	0	0	1
-2:11I,-1:1D	0	0	0	0	0	0	0	0	0	0	0	1
-10:1I,-5:13D	0	0	0	0	0	0	0	0	0	0	0	1
-1:58I	0	0	0	0	0	0	0	0	0	0	0	1
2:9D	0	0	0	0	0	0	0	0	0	0	0	1
1:7I,5:25I	0	0	0	0	0	0	0	0	0	0	0	1
-2:26I,-1:1D	0	0	0	0	0	0	0	0	0	0	0	1
-11:1I,-5:13D	0	0	0	0	0	0	0	0	0	0	0	1
-1:5I,3:15I	0	0	0	0	0	0	0	0	0	0	0	1
-4:16I	0	0	0	0	0	0	0	0	0	0	0	1
2:42I	0	0	0	0	0	0	0	0	0	0	0	1
-12:2D	0	0	0	0	0	0	0	0	0	0	0	1
-17:4D	0	0	0	0	0	0	0	0	0	0	0	1
Other	0	284	427	0	205	151	0	66	60	0	88	69

## Sheet: HEK293T_CXCR4
Sample	I.NT	I.RNP...65mer.unco...SpCas9.WT.	I.RNPD...65mer.coup...SpCas9.SNAP.	II.NT	II.RNP...65mer.unco...SpCas9.WT.	II.RNPD...65mer.coup...SpCas9.SNAP.	III.NT	III.RNP...65mer.unco...SpCas9.WT.	III.RNPD...65mer.coup...SpCas9.SNAP.	IV.NT	IV.RNP.unco..65.mer..SpCas9.WT.	IV.RNPD.coup..65.mer..SpCas9.SNAP.
no variant	117687	158790	141684	128743	129526	131104	123398	121553	123911	145726	129401	120440
Corrected: SNV:-1T,1C	11	72	7936	8	106	8477	2	17	1455	4	67	1294
SNV:-11G	47	51	56	59	176	74	35	40	51	53	164	45
SNV:-13T	36	48	44	48	80	35	32	25	14	41	72	53
SNV:-16G	32	45	42	27	77	44	29	33	34	42	76	37
SNV:-4G	33	52	38	26	59	29	29	33	28	47	51	29
SNV:-12A	52	23	33	31	53	40	29	32	44	32	52	29
SNV:-1T	16	20	98	22	40	100	9	18	48	15	28	22
SNV:-13A	22	47	29	37	30	31	26	19	43	43	37	34
SNV:6T	20	27	27	16	63	38	28	12	27	30	71	27
SNV:-17T	24	23	26	24	69	36	17	26	17	26	73	23
SNV:-6G	28	35	24	16	48	21	31	29	22	34	34	27
SNV:1C	10	14	100	11	43	64	1	10	26	12	26	27
SNV:-6T	20	37	25	32	36	29	28	19	21	31	28	19
SNV:-10T	11	20	24	20	61	14	11	17	15	22	49	16
SNV:-15G	19	30	30	20	17	27	27	28	14	22	17	26
SNV:-9G	9	25	24	17	31	20	15	20	19	30	33	26
SNV:-8C	17	28	22	25	26	19	29	22	16	22	23	18
SNV:4G	12	24	35	25	19	23	19	18	16	20	15	17
SNV:-2G	18	25	19	20	27	18	22	26	14	20	17	14
SNV:-11C	24	24	25	19	20	27	16	26	5	20	20	11
SNV:-5T	19	21	21	21	12	15	12	23	21	21	23	26
SNV:-1A	4	22	54	6	19	37	5	8	15	11	18	16
SNV:-3G	11	10	17	13	29	12	11	25	13	31	19	23
SNV:1G	9	20	24	11	21	25	12	18	10	22	22	15
SNV:3T	6	9	9	22	24	22	9	16	23	20	28	15
SNV:2A	17	4	9	15	31	15	11	8	13	12	39	9
SNV:5A	16	14	12	10	29	12	5	6	15	10	34	12
SNV:-10A	11	17	18	11	19	16	19	11	12	9	12	7
SNV:-9T	13	17	18	21	17	10	2	16	7	7	14	15
SNV:-7A	17	17	12	10	6	15	15	13	14	7	15	10
SNV:6A	8	10	11	20	14	12	8	6	10	12	24	10
SNV:5T	11	6	12	3	13	10	6	4	19	20	15	13
SNV:1T	8	8	20	12	11	15	5	6	8	11	13	7
SNV:4T	14	16	6	8	14	6	3	12	4	11	18	9
SNV:-16T	9	14	9	6	3	8	14	14	8	8	9	15
SNV:-3C	4	7	11	11	22	12	6	9	6	8	15	5
SNV:-3T	13	10	11	5	11	8	10	8	6	20	5	6
SNV:-16C	10	10	8	8	12	9	5	7	6	5	20	10
SNV:-8A	6	10	5	7	14	8	9	5	9	7	16	12
SNV:-7T	7	1	17	8	9	6	8	9	6	10	8	8
SNV:2T	1	7	3	11	22	8	3	8	6	8	5	13
SNV:-17A	12	9	10	7	7	6	8	6	8	6	6	4
SNV:-14T	1	8	8	0	18	8	4	7	4	10	12	9
SNV:-2T	8	2	10	5	16	9	3	2	2	5	16	4
SNV:-14A	6	9	3	6	12	10	10	4	3	4	6	4
SNV:3A	6	6	6	5	14	9	3	3	6	3	7	8
SNV:-13G	5	3	4	3	14	4	5	6	2	5	16	2
SNV:-8G	6	4	6	4	14	5	5	5	2	4	11	2
SNV:-4C	3	5	9	1	11	7	6	0	4	7	9	5
SNV:-4T	8	13	6	3	7	3	1	4	4	4	8	5
SNV:-15T	1	7	10	9	2	5	5	7	4	5	4	7
SNV:-5A	4	3	3	6	12	5	2	7	3	10	7	0
SNV:-11A	5	6	3	4	11	6	3	3	9	4	2	2
SNV:-12T	0	2	3	4	7	10	3	4	5	4	9	2
SNV:3C	0	1	3	2	10	1	0	0	2	3	18	3
SNV:-1C	1	2	5	0	6	13	6	0	2	4	1	2
SNV:2C	2	7	6	3	4	2	2	2	2	0	5	0
SNV:-17C	3	2	5	0	3	1	5	1	0	4	5	3
SNV:-6G,-1T,1C	0	0	10	0	0	19	0	0	1	0	1	0
SNV:4C	1	4	4	7	7	0	0	2	0	1	3	1
SNV:-6C	3	5	2	1	1	5	3	1	0	2	6	1
SNV:-5G	4	0	2	3	4	5	1	3	0	0	5	0
SNV:-2C	1	1	4	0	3	6	1	1	2	3	3	1
SNV:-10C	0	1	7	2	1	2	1	0	5	3	4	0
SNV:-9C	3	2	2	0	3	0	3	3	1	2	4	0
SNV:-15C	0	1	2	1	1	4	0	1	4	3	2	4
SNV:6C	3	2	1	2	4	3	2	1	3	1	0	0
SNV:-14C	0	1	0	2	5	3	0	1	0	2	2	3
SNV:-7C	5	0	0	3	1	0	3	0	4	1	0	1
SNV:-1T,1C,5C,6A	0	0	0	0	16	0	0	0	0	0	0	0
SNV:-12C	1	2	0	1	1	4	0	0	4	0	0	2
SNV:-2G,-1T,1C	0	0	15	0	0	0	0	0	0	0	0	0
SNV:5C	0	0	2	2	0	2	1	0	1	2	5	0
SNV:-17T,-13A	0	0	1	1	1	2	3	1	1	2	2	0
SNV:-12A,-11G	0	2	0	1	5	0	0	0	0	0	5	0
SNV:3T,6T	0	1	0	1	2	1	1	2	0	0	3	2
SNV:5T,6T	0	2	1	2	1	0	2	1	1	0	1	0
SNV:-11G,-6G	0	1	1	2	3	0	2	1	0	0	0	0
SNV:-16G,-11G	1	0	0	1	3	0	0	0	0	0	2	2
SNV:-17T,-11G	3	0	0	0	2	0	0	0	0	0	3	1
SNV:-11C,-1T,1C	0	0	1	0	0	8	0	0	0	0	0	0
SNV:-12A,-1T,1C	0	1	3	0	0	2	0	0	1	0	0	1
SNV:-10T,6T	0	1	0	2	1	0	0	0	0	1	3	0
SNV:-13G,-11G	0	1	0	1	0	1	0	0	0	1	3	1
SNV:-1T,1C,4C	0	0	8	0	0	0	0	0	0	0	0	0
SNV:-15T,-1T,1C	0	0	8	0	0	0	0	0	0	0	0	0
SNV:-11G,-1T,1C	0	0	0	0	0	6	0	0	1	0	0	1
SNV:-4G,-1T,1C	0	0	2	0	0	5	0	0	0	0	0	0
SNV:-1T,1C,4G	0	0	4	0	0	1	0	0	1	0	0	1
SNV:-1T,1G	0	0	1	1	0	2	0	0	2	0	1	0
SNV:-1A,1C	0	0	4	0	0	2	0	0	0	0	0	1
SNV:-13A,6T	0	0	1	1	2	0	0	1	0	0	1	1
SNV:-12A,2A	0	0	0	0	6	0	0	0	0	1	0	0
SNV:-12A,-4G	0	0	0	0	4	1	0	0	0	0	2	0
SNV:-17T,6T	0	0	0	0	2	1	0	0	0	1	2	1
SNV:-16G,5A	0	0	0	0	4	0	0	0	0	0	3	0
SNV:1C,2A	0	0	0	0	0	1	0	0	3	1	1	1
SNV:-11G,2A	1	1	0	0	2	0	0	0	0	0	2	0
SNV:-8G,-5A	0	1	0	3	1	0	0	0	0	1	0	0
SNV:-11A,-10C,-9C,-7C,-6C,-3G,-1A,1G	0	6	0	0	0	0	0	0	0	0	0	0
SNV:-12C,-11A,-8A,-6G,-5G,-2G,-1A	0	6	0	0	0	0	0	0	0	0	0	0
SNV:-16G,-1T,1C	0	0	2	0	0	3	0	0	0	0	0	1
SNV:1C,4T	0	0	5	0	0	1	0	0	0	0	0	0
SNV:-13A,-1T,1C	0	0	2	0	0	4	0	0	0	0	0	0
SNV:-5T,-1T,1C	0	0	0	0	0	5	0	0	0	0	0	1
SNV:-5A,-1T,1C	0	0	0	0	0	0	0	0	0	0	0	6
SNV:1T,3C,6C	0	5	0	0	0	0	0	0	0	0	0	0
SNV:1T,4C,5C	0	0	5	0	0	0	0	0	0	0	0	0
SNV:-1T,1C,3A	0	0	5	0	0	0	0	0	0	0	0	0
SNV:-1T,1C,2A	0	0	2	0	0	3	0	0	0	0	0	0
SNV:-8G,-1T,1C	0	0	2	0	0	1	0	0	1	0	1	0
SNV:-17T,-16G	0	0	1	1	0	0	0	0	0	2	1	0
SNV:-9G,5A	0	0	0	0	4	0	0	0	0	0	1	0
SNV:-11G,6T	0	0	0	0	2	1	1	0	1	0	0	0
SNV:1C,4G	0	0	0	0	1	0	0	2	0	1	1	0
SNV:-17T,1C	0	0	0	0	2	0	0	1	0	0	0	2
SNV:-17T,-13T	0	0	0	0	3	0	0	1	0	0	1	0
SNV:-9G,-1T,1C	0	0	0	0	0	5	0	0	0	0	0	0
SNV:-17T,-10T	0	1	0	0	0	0	0	0	0	2	1	0
SNV:-17T,3T	0	1	0	0	0	0	1	0	0	0	1	1
SNV:-1C,1C	0	0	1	0	0	0	0	0	3	0	0	0
SNV:-16G,-6G	0	0	1	0	0	1	0	1	0	1	0	0
SNV:-4C,-3C,2A	0	0	4	0	0	0	0	0	0	0	0	0
SNV:-13T,-1T,1C	0	0	1	0	0	2	0	0	0	0	0	1
SNV:-16G,-9G	0	0	1	0	1	1	0	0	0	0	0	1
SNV:-16G,-12A	0	0	0	0	2	0	0	0	1	0	1	0
SNV:-9G,-6G	0	0	0	0	1	0	0	0	0	1	0	2
SNV:-16C,6T	0	0	0	0	2	0	1	0	0	1	0	0
SNV:3T,4G	0	0	0	0	1	1	1	0	0	0	1	0
SNV:-1T,1C,6T	0	0	0	0	0	3	0	0	0	0	0	1
SNV:-1T,1C,2T	0	0	0	0	0	1	0	0	0	0	0	3
SNV:-9T,-4T	1	0	0	1	0	0	0	1	0	0	0	0
SNV:-8A,-4G	1	0	0	0	2	0	0	0	0	0	0	0
SNV:-4G,2A	1	0	0	1	1	0	0	0	0	0	0	0
SNV:-4G,-1A	0	1	1	0	0	0	0	0	0	1	0	0
SNV:-9G,6A	0	1	0	0	2	0	0	0	0	0	0	0
SNV:-1T,1C,3T	0	0	2	0	0	1	0	0	0	0	0	0
SNV:-13T,3T	0	0	1	0	1	0	0	0	0	0	1	0
SNV:-10A,-1T,1C	0	0	3	0	0	0	0	0	0	0	0	0
SNV:-16G,-13A	0	0	1	0	0	0	0	0	1	1	0	0
SNV:1C,3T	0	0	1	0	0	1	0	0	0	1	0	0
SNV:-13T,-4G	0	0	1	1	0	0	0	0	0	1	0	0
SNV:-3C,1C	0	0	1	0	1	0	0	0	0	0	1	0
SNV:-3C,-1T,1C	0	0	2	0	0	1	0	0	0	0	0	0
SNV:3A,4G	0	0	1	0	0	0	0	0	0	0	2	0
SNV:-17T,-6G	0	0	1	1	1	0	0	0	0	0	0	0
SNV:-8A,-6G	0	0	0	0	2	0	0	0	0	1	0	0
SNV:-17T,-12A	0	0	0	0	2	0	0	0	0	0	1	0
SNV:-13T,3C	0	0	0	0	2	0	0	0	0	0	1	0
SNV:-11G,5A	0	0	0	0	1	0	0	0	1	0	1	0
SNV:-13T,-11G	0	0	0	0	1	0	0	0	0	0	2	0
SNV:-14T,-10T	0	0	0	0	1	0	0	0	1	0	1	0
SNV:-9T,-8G	0	0	0	0	1	0	0	0	1	0	1	0
SNV:-13A,-10T	0	0	0	0	1	0	0	0	1	1	0	0
SNV:2A,5A	0	0	0	0	1	1	0	0	0	0	1	0
SNV:-3G,-1C	0	0	0	0	0	1	1	0	1	0	0	0
SNV:-13G,-4G	0	0	0	0	0	1	0	0	0	0	2	0
SNV:-6T,-1T,1C	0	0	0	0	0	0	0	0	1	0	0	2
SNV:-12A,-4G,2A	0	0	0	0	0	0	0	0	0	1	2	0
SNV:-8A,-6T	1	0	0	0	1	0	0	0	0	0	0	0
SNV:-11G,-1T	0	1	0	0	0	0	0	0	1	0	0	0
SNV:-5G,-1T	0	1	1	0	0	0	0	0	0	0	0	0
SNV:-11G,-4C	0	1	1	0	0	0	0	0	0	0	0	0
SNV:-16G,-9T	0	1	1	0	0	0	0	0	0	0	0	0
SNV:-13A,3T	0	1	0	0	0	0	0	0	0	0	0	1
SNV:-6G,-2C	0	1	0	0	1	0	0	0	0	0	0	0
SNV:-17T,3C	0	1	0	0	0	0	0	1	0	0	0	0
SNV:-2G,-1T	0	1	0	0	1	0	0	0	0	0	0	0
SNV:-6G,6T	0	1	1	0	0	0	0	0	0	0	0	0
SNV:-11G,-2G	0	1	0	0	0	0	0	0	0	0	1	0
SNV:-10T,-9C,-5A	0	1	0	0	0	0	0	0	0	0	1	0
SNV:-11G,4G	0	1	0	0	1	0	0	0	0	0	0	0
SNV:-13A,2A	0	1	0	0	1	0	0	0	0	0	0	0
SNV:-1T,4T	0	1	0	0	0	1	0	0	0	0	0	0
SNV:-3G,4G	0	0	1	0	0	0	0	0	0	0	1	0
SNV:-1T,1C,4T	0	0	2	0	0	0	0	0	0	0	0	0
SNV:-3G,-1T,1C	0	0	1	0	0	1	0	0	0	0	0	0
SNV:-3C,4G	0	0	1	0	0	0	0	0	0	0	1	0
SNV:-5A,-1T	0	0	1	0	1	0	0	0	0	0	0	0
SNV:-4C,-2G	0	0	1	0	0	0	0	0	0	0	0	1
SNV:-10T,-1T,1C	0	0	1	0	0	0	0	0	0	0	0	1
SNV:-16T,-1T,1C	0	0	1	0	0	1	0	0	0	0	0	0
SNV:-1T,1C,2C	0	0	1	0	0	1	0	0	0	0	0	0
SNV:-9T,-1T,1C	0	0	1	0	0	1	0	0	0	0	0	0
SNV:-3C,2C	0	0	0	2	0	0	0	0	0	0	0	0
SNV:2C,4G	0	0	0	1	0	0	0	0	0	0	1	0
SNV:-2T,3T	0	0	0	1	0	0	0	0	0	1	0	0
SNV:-16G,-15G	0	0	0	1	0	1	0	0	0	0	0	0
SNV:5A,6A	0	0	0	1	0	1	0	0	0	0	0	0
SNV:-1A,1G,4G	0	0	0	1	0	1	0	0	0	0	0	0
SNV:-9G,-4G	0	0	0	1	0	0	0	0	1	0	0	0
SNV:-12A,-9G	0	0	0	0	1	0	0	0	0	1	0	0
SNV:5A,6T	0	0	0	0	1	0	1	0	0	0	0	0
SNV:-4C,-2C,-1C,3A	0	0	0	0	2	0	0	0	0	0	0	0
SNV:-10T,-9T	0	0	0	0	1	0	0	0	1	0	0	0
SNV:-14C,-11G,-6G	0	0	0	0	2	0	0	0	0	0	0	0
SNV:-5A,-2T	0	0	0	0	1	0	0	0	0	0	1	0
SNV:-17T,-13A,1C	0	0	0	0	1	0	0	1	0	0	0	0
SNV:-13T,2A	0	0	0	0	1	0	0	0	0	0	1	0
SNV:-13T,-5G	0	0	0	0	1	0	0	0	0	1	0	0
SNV:-14T,3T	0	0	0	0	2	0	0	0	0	0	0	0
SNV:-13G,-12A	0	0	0	0	2	0	0	0	0	0	0	0
SNV:-17T,-16C	0	0	0	0	1	0	0	0	0	0	0	1
SNV:-16G,-13T	0	0	0	0	1	0	0	0	0	0	1	0
SNV:-13A,-11G,-5A	0	0	0	0	1	0	1	0	0	0	0	0
SNV:-10T,-9G	0	0	0	0	1	0	0	1	0	0	0	0
SNV:-15G,-7T	0	0	0	0	2	0	0	0	0	0	0	0
SNV:-16G,-12A,5A	0	0	0	0	1	0	0	0	0	0	1	0
SNV:-13A,-5T	0	0	0	0	1	0	0	0	0	0	1	0
SNV:-17T,-7T	0	0	0	0	0	1	0	0	0	0	1	0
SNV:-17T,-1T,1C	0	0	0	0	0	2	0	0	0	0	0	0
SNV:-13T,6T	0	0	0	0	0	1	1	0	0	0	0	0
SNV:-4C,5T	0	0	0	0	0	0	1	0	0	1	0	0
SNV:-12T,-10T,-7T	0	0	0	0	0	0	0	1	0	1	0	0
SNV:1T,2A,3C	0	0	0	0	0	0	0	0	2	0	0	0
SNV:-3C,3T	0	0	0	0	0	0	0	0	1	0	1	0
SNV:-17T,5T	0	0	0	0	0	0	0	0	0	1	1	0
SNV:2T,3T	0	0	0	0	0	0	0	0	0	0	2	0
SNV:-8G,-2C	0	0	0	0	0	0	0	0	0	0	2	0
SNV:-11G,-3C	0	0	0	0	0	0	0	0	0	0	1	1
SNV:-16G,-11G,5A,6A	0	0	0	0	0	0	0	0	0	0	2	0
SNV:3T,5T	0	0	0	0	0	0	0	0	0	0	2	0
SNV:-13T,-10T	0	0	0	0	0	0	0	0	0	0	2	0
SNV:-17T,-4G	0	0	0	0	0	0	0	0	0	0	1	1
SNV:-7C,-4G	1	0	0	0	0	0	0	0	0	0	0	0
SNV:-5G,-3G,-2C,2T	1	0	0	0	0	0	0	0	0	0	0	0
SNV:-5G,-4G,1C	1	0	0	0	0	0	0	0	0	0	0	0
SNV:-4T,-1T	1	0	0	0	0	0	0	0	0	0	0	0
SNV:-16T,-13T,-10T,-7T,-6T,-5T,-4T	1	0	0	0	0	0	0	0	0	0	0	0
SNV:-15C,-13A,-12A,-11G,-6T,-4C,2T,5T	1	0	0	0	0	0	0	0	0	0	0	0
SNV:-8C,-7T	1	0	0	0	0	0	0	0	0	0	0	0
SNV:-8A,-1A	1	0	0	0	0	0	0	0	0	0	0	0
SNV:-16T,-15T,-14T,-5A,-1C,1C,2T	1	0	0	0	0	0	0	0	0	0	0	0
SNV:-13A,-6C,-3G,2T,5T	1	0	0	0	0	0	0	0	0	0	0	0
SNV:-17T,-1C	1	0	0	0	0	0	0	0	0	0	0	0
SNV:-9T,-4C	1	0	0	0	0	0	0	0	0	0	0	0
SNV:-13G,-5T	1	0	0	0	0	0	0	0	0	0	0	0
SNV:-12C,-11A	1	0	0	0	0	0	0	0	0	0	0	0
SNV:-3G,1G	1	0	0	0	0	0	0	0	0	0	0	0
SNV:-11A,-2T	1	0	0	0	0	0	0	0	0	0	0	0
SNV:-11G,-3C,6T	1	0	0	0	0	0	0	0	0	0	0	0
SNV:-13A,-12C,-10C,-6C	1	0	0	0	0	0	0	0	0	0	0	0
SNV:-16G,-11G,3T	1	0	0	0	0	0	0	0	0	0	0	0
SNV:-13G,-4C,2A	1	0	0	0	0	0	0	0	0	0	0	0
SNV:-11A,-8G,-5G	1	0	0	0	0	0	0	0	0	0	0	0
SNV:-1T,2C,3T	1	0	0	0	0	0	0	0	0	0	0	0
SNV:-15G,-13A	1	0	0	0	0	0	0	0	0	0	0	0
SNV:3A,6T	1	0	0	0	0	0	0	0	0	0	0	0
SNV:-17A,-10T	1	0	0	0	0	0	0	0	0	0	0	0
SNV:-15G,-14C,3T	1	0	0	0	0	0	0	0	0	0	0	0
SNV:-14C,-10T	1	0	0	0	0	0	0	0	0	0	0	0
SNV:-13G,-4T	1	0	0	0	0	0	0	0	0	0	0	0
SNV:-16C,-12T,-5A,-1T,2T	1	0	0	0	0	0	0	0	0	0	0	0
SNV:-13T,-9G,-1A	1	0	0	0	0	0	0	0	0	0	0	0
SNV:-1C,3T,5C,6T	1	0	0	0	0	0	0	0	0	0	0	0
SNV:-12T,-10T,-4C	1	0	0	0	0	0	0	0	0	0	0	0
SNV:-2C,1G,5A	1	0	0	0	0	0	0	0	0	0	0	0
SNV:-4T,2C	1	0	0	0	0	0	0	0	0	0	0	0
SNV:-13A,-8G	1	0	0	0	0	0	0	0	0	0	0	0
SNV:-15G,-6G,-4G,-3G	1	0	0	0	0	0	0	0	0	0	0	0
SNV:-2G,-1T,2C,4C,5A	1	0	0	0	0	0	0	0	0	0	0	0
SNV:-11G,-1A	1	0	0	0	0	0	0	0	0	0	0	0
SNV:-12A,-9C,5A	1	0	0	0	0	0	0	0	0	0	0	0
SNV:-5A,-3T,4G	1	0	0	0	0	0	0	0	0	0	0	0
SNV:-16G,-14C,2A	1	0	0	0	0	0	0	0	0	0	0	0
SNV:-6C,-3C	1	0	0	0	0	0	0	0	0	0	0	0
SNV:-6T,-2C	1	0	0	0	0	0	0	0	0	0	0	0
SNV:-10T,5T,6T	1	0	0	0	0	0	0	0	0	0	0	0
SNV:-16C,-4G	1	0	0	0	0	0	0	0	0	0	0	0
SNV:-16T,-15G,-14T,3T	1	0	0	0	0	0	0	0	0	0	0	0
SNV:-8G,-1C,6T	1	0	0	0	0	0	0	0	0	0	0	0
SNV:-10A,-4G,-3C	0	1	0	0	0	0	0	0	0	0	0	0
SNV:-9C,-6C,-4G	0	1	0	0	0	0	0	0	0	0	0	0
SNV:1C,2T,4G,5A	0	1	0	0	0	0	0	0	0	0	0	0
SNV:-15T,-7A,-6T,-4G,5C,6C	0	1	0	0	0	0	0	0	0	0	0	0
SNV:-15C,-14T,2T,5T	0	1	0	0	0	0	0	0	0	0	0	0
SNV:-8G,-6C,-3G,-2C	0	1	0	0	0	0	0	0	0	0	0	0
SNV:-3C,4T	0	1	0	0	0	0	0	0	0	0	0	0
SNV:-13T,-1A	0	1	0	0	0	0	0	0	0	0	0	0
SNV:-11C,-3C,-2C,2A,5T	0	1	0	0	0	0	0	0	0	0	0	0
SNV:-4C,5A	0	1	0	0	0	0	0	0	0	0	0	0
SNV:-11A,5A	0	1	0	0	0	0	0	0	0	0	0	0
SNV:-8G,-3G,-2T	0	1	0	0	0	0	0	0	0	0	0	0
SNV:-6G,-4C,2A,6A	0	1	0	0	0	0	0	0	0	0	0	0
SNV:-7A,-6C	0	1	0	0	0	0	0	0	0	0	0	0
SNV:-9G,-8G,-5A,-4G	0	1	0	0	0	0	0	0	0	0	0	0
SNV:-9T,1G	0	1	0	0	0	0	0	0	0	0	0	0
SNV:-4C,-2T	0	1	0	0	0	0	0	0	0	0	0	0
SNV:-12C,-10A,-8A,-3C,-1T	0	1	0	0	0	0	0	0	0	0	0	0
SNV:-8C,-4C	0	1	0	0	0	0	0	0	0	0	0	0
SNV:-11G,-10C,-7T,-2G,-1T	0	1	0	0	0	0	0	0	0	0	0	0
SNV:-11A,-2T,1T,3C,6C	0	1	0	0	0	0	0	0	0	0	0	0
SNV:-13G,-11G,-3G,2A	0	1	0	0	0	0	0	0	0	0	0	0
SNV:-15C,4C	0	1	0	0	0	0	0	0	0	0	0	0
SNV:-4G,1T	0	1	0	0	0	0	0	0	0	0	0	0
SNV:-17T,5A	0	1	0	0	0	0	0	0	0	0	0	0
SNV:-13G,-8G,-5T	0	1	0	0	0	0	0	0	0	0	0	0
SNV:-8A,-7A	0	1	0	0	0	0	0	0	0	0	0	0
SNV:-17T,-12A,-11G,-6G,-5A	0	1	0	0	0	0	0	0	0	0	0	0
SNV:-8G,-3C,1G	0	1	0	0	0	0	0	0	0	0	0	0
SNV:-10T,-8A	0	1	0	0	0	0	0	0	0	0	0	0
SNV:-14T,3C	0	1	0	0	0	0	0	0	0	0	0	0
SNV:-10T,-9C,-3C	0	1	0	0	0	0	0	0	0	0	0	0
SNV:-17T,-3C	0	1	0	0	0	0	0	0	0	0	0	0
SNV:-11G,-9G,-6G,-4G,1C	0	1	0	0	0	0	0	0	0	0	0	0
SNV:-8C,-6G,-4C,-2G	0	1	0	0	0	0	0	0	0	0	0	0
SNV:-17C,-3T	0	1	0	0	0	0	0	0	0	0	0	0
SNV:-14T,-13G,-11C,-1A	0	1	0	0	0	0	0	0	0	0	0	0
SNV:-16G,-11G,-6G	0	1	0	0	0	0	0	0	0	0	0	0
SNV:1T,5C,6T	0	1	0	0	0	0	0	0	0	0	0	0
SNV:-8G,-5G	0	1	0	0	0	0	0	0	0	0	0	0
SNV:-17T,-13A,6T	0	1	0	0	0	0	0	0	0	0	0	0
SNV:-10T,-5A	0	1	0	0	0	0	0	0	0	0	0	0
SNV:-5T,4T	0	1	0	0	0	0	0	0	0	0	0	0
SNV:-2C,2T	0	1	0	0	0	0	0	0	0	0	0	0
SNV:-10T,-9C,6T	0	1	0	0	0	0	0	0	0	0	0	0
SNV:-15C,-11G	0	1	0	0	0	0	0	0	0	0	0	0
SNV:-13A,-11G,-6G	0	1	0	0	0	0	0	0	0	0	0	0
SNV:-14T,-12T,6T	0	1	0	0	0	0	0	0	0	0	0	0
SNV:-16G,2C,6T	0	1	0	0	0	0	0	0	0	0	0	0
SNV:1C,5T	0	1	0	0	0	0	0	0	0	0	0	0
SNV:-4G,2T	0	1	0	0	0	0	0	0	0	0	0	0
SNV:-16G,-10T,-9G,-5A,1G	0	1	0	0	0	0	0	0	0	0	0	0
SNV:-14A,-11G	0	1	0	0	0	0	0	0	0	0	0	0
SNV:-10T,-8G	0	1	0	0	0	0	0	0	0	0	0	0
SNV:-13A,-12A,-2T,-1T	0	1	0	0	0	0	0	0	0	0	0	0
SNV:-16G,-15T,-2T,6T	0	1	0	0	0	0	0	0	0	0	0	0
SNV:-12C,-8G,-6G	0	0	1	0	0	0	0	0	0	0	0	0
SNV:-3G,-2C	0	0	1	0	0	0	0	0	0	0	0	0
SNV:-16G,-13T,-11A	0	0	1	0	0	0	0	0	0	0	0	0
SNV:-16C,-15C,-14T,-12T,3T,4C	0	0	1	0	0	0	0	0	0	0	0	0
SNV:-4G,-2C	0	0	1	0	0	0	0	0	0	0	0	0
SNV:-4G,-2G,-1A	0	0	1	0	0	0	0	0	0	0	0	0
SNV:-14A,-1T,1C	0	0	1	0	0	0	0	0	0	0	0	0
SNV:-8C,-2T,1C,4G,6T	0	0	1	0	0	0	0	0	0	0	0	0
SNV:-13A,1T	0	0	1	0	0	0	0	0	0	0	0	0
SNV:-12A,-11A,-9T,-6C	0	0	1	0	0	0	0	0	0	0	0	0
SNV:-4C,-1T,1C	0	0	1	0	0	0	0	0	0	0	0	0
SNV:-11A,-9T,-6C	0	0	1	0	0	0	0	0	0	0	0	0
SNV:-15T,-14T,-9G,-7C,-1T,1G	0	0	1	0	0	0	0	0	0	0	0	0
SNV:-9G,-1T,1C,5T	0	0	1	0	0	0	0	0	0	0	0	0
SNV:-16G,-15C,-13T,-9C,-6C	0	0	1	0	0	0	0	0	0	0	0	0
SNV:-16G,-14A,-13G,-8G,-3C,4C,5T	0	0	1	0	0	0	0	0	0	0	0	0
SNV:-3C,1C,4G	0	0	1	0	0	0	0	0	0	0	0	0
SNV:-8G,-1C	0	0	1	0	0	0	0	0	0	0	0	0
SNV:-13A,-11C,-7T	0	0	1	0	0	0	0	0	0	0	0	0
SNV:-2T,2A,6T	0	0	1	0	0	0	0	0	0	0	0	0
SNV:-8C,-3C	0	0	1	0	0	0	0	0	0	0	0	0
SNV:-5T,-4G,-1C	0	0	1	0	0	0	0	0	0	0	0	0
SNV:-4C,2C,3C	0	0	1	0	0	0	0	0	0	0	0	0
SNV:-12A,-9T,-8G,-6C,-1A	0	0	1	0	0	0	0	0	0	0	0	0
SNV:-15C,-13G,-11A,-8G,-3G,-2G,-1T	0	0	1	0	0	0	0	0	0	0	0	0
SNV:-1T,1T,3T	0	0	1	0	0	0	0	0	0	0	0	0
SNV:-9T,-8G,-2G	0	0	1	0	0	0	0	0	0	0	0	0
SNV:-13A,-12A,-9G	0	0	1	0	0	0	0	0	0	0	0	0
SNV:-3C,-1A	0	0	1	0	0	0	0	0	0	0	0	0
SNV:-11G,-4T,-1T	0	0	1	0	0	0	0	0	0	0	0	0
SNV:-3T,6T	0	0	1	0	0	0	0	0	0	0	0	0
SNV:-1T,1C,3T,6T	0	0	1	0	0	0	0	0	0	0	0	0
SNV:-17C,-16G,-1T,1C	0	0	1	0	0	0	0	0	0	0	0	0
SNV:4C,5C	0	0	1	0	0	0	0	0	0	0	0	0
SNV:-4C,1T	0	0	1	0	0	0	0	0	0	0	0	0
SNV:-14A,5T	0	0	1	0	0	0	0	0	0	0	0	0
SNV:-1T,2T	0	0	1	0	0	0	0	0	0	0	0	0
SNV:-16G,-10A	0	0	1	0	0	0	0	0	0	0	0	0
SNV:-5A,-4C,-3T,-1C,5T,6T	0	0	1	0	0	0	0	0	0	0	0	0
SNV:-11G,-9C,-6T,4G	0	0	1	0	0	0	0	0	0	0	0	0
SNV:-13A,-8C	0	0	1	0	0	0	0	0	0	0	0	0
SNV:-7A,-1T,1C,3A	0	0	1	0	0	0	0	0	0	0	0	0
SNV:-13A,-7T	0	0	1	0	0	0	0	0	0	0	0	0
SNV:-17T,-13T,-1T,1C	0	0	1	0	0	0	0	0	0	0	0	0
SNV:1G,2A	0	0	1	0	0	0	0	0	0	0	0	0
SNV:-10A,3T	0	0	1	0	0	0	0	0	0	0	0	0
SNV:-15G,-13T,1C,2T,3T	0	0	1	0	0	0	0	0	0	0	0	0
SNV:-13G,-1T,1C	0	0	1	0	0	0	0	0	0	0	0	0
SNV:-4C,-1T,1C,3T,6T	0	0	1	0	0	0	0	0	0	0	0	0
SNV:-16C,-1T,1C	0	0	1	0	0	0	0	0	0	0	0	0
SNV:-6G,-3C,1C	0	0	1	0	0	0	0	0	0	0	0	0
SNV:-3C,-2G,4G	0	0	1	0	0	0	0	0	0	0	0	0
SNV:-3G,2C,4G	0	0	0	1	0	0	0	0	0	0	0	0
SNV:-11A,-4G,-1T	0	0	0	1	0	0	0	0	0	0	0	0
SNV:-15T,-3C,3T	0	0	0	1	0	0	0	0	0	0	0	0
SNV:-10A,-2G	0	0	0	1	0	0	0	0	0	0	0	0
SNV:-9G,6T	0	0	0	1	0	0	0	0	0	0	0	0
SNV:-11G,-10C,-3G,-2C,1G	0	0	0	1	0	0	0	0	0	0	0	0
SNV:-13T,-8A	0	0	0	1	0	0	0	0	0	0	0	0
SNV:-11G,-6G,2A	0	0	0	1	0	0	0	0	0	0	0	0
SNV:-8G,-2T	0	0	0	1	0	0	0	0	0	0	0	0
SNV:-8G,-6C	0	0	0	1	0	0	0	0	0	0	0	0
SNV:-3G,-2G	0	0	0	1	0	0	0	0	0	0	0	0
SNV:-13T,-9C,-8A,-4G	0	0	0	1	0	0	0	0	0	0	0	0
SNV:-10T,-3C,6T	0	0	0	1	0	0	0	0	0	0	0	0
SNV:-3C,2T	0	0	0	1	0	0	0	0	0	0	0	0
SNV:-14T,-9C	0	0	0	1	0	0	0	0	0	0	0	0
SNV:-12A,-6C	0	0	0	1	0	0	0	0	0	0	0	0
SNV:1C,2C,3T,4G	0	0	0	1	0	0	0	0	0	0	0	0
SNV:-4T,1C	0	0	0	1	0	0	0	0	0	0	0	0
SNV:-14T,-13G,-4G	0	0	0	1	0	0	0	0	0	0	0	0
SNV:-16C,-11G	0	0	0	1	0	0	0	0	0	0	0	0
SNV:-10T,3T	0	0	0	1	0	0	0	0	0	0	0	0
SNV:-13T,-8A,-4C,-1A	0	0	0	1	0	0	0	0	0	0	0	0
SNV:-3C,1T	0	0	0	1	0	0	0	0	0	0	0	0
SNV:-3C,-2T,6T	0	0	0	1	0	0	0	0	0	0	0	0
SNV:-11G,-5T	0	0	0	1	0	0	0	0	0	0	0	0
SNV:-17T,-1T,6T	0	0	0	0	1	0	0	0	0	0	0	0
SNV:-17T,-9G	0	0	0	0	1	0	0	0	0	0	0	0
SNV:-9G,2A,5A	0	0	0	0	1	0	0	0	0	0	0	0
SNV:-16G,-11G,-9G,-6G	0	0	0	0	1	0	0	0	0	0	0	0
SNV:-4T,-2T	0	0	0	0	1	0	0	0	0	0	0	0
SNV:-11G,-3C,-2T	0	0	0	0	1	0	0	0	0	0	0	0
SNV:-9C,-4G	0	0	0	0	1	0	0	0	0	0	0	0
SNV:-17C,-14T,-12T,-7T,-6C,-3G,-2C,-1T	0	0	0	0	1	0	0	0	0	0	0	0
SNV:4C,5T	0	0	0	0	1	0	0	0	0	0	0	0
SNV:-14T,-10A	0	0	0	0	1	0	0	0	0	0	0	0
SNV:-15C,-14C,-13A,-6G,-5T,-4G,-2G,1T,6T	0	0	0	0	1	0	0	0	0	0	0	0
SNV:-16G,-12A,-11G	0	0	0	0	1	0	0	0	0	0	0	0
SNV:-16G,-14C,-13T,-5A,-1T	0	0	0	0	1	0	0	0	0	0	0	0
SNV:-11A,-10C,-9T,-7A,-4G,-2C	0	0	0	0	1	0	0	0	0	0	0	0
SNV:-9T,-8G,5C	0	0	0	0	1	0	0	0	0	0	0	0
SNV:-16C,-14T,-12T,1T,3C	0	0	0	0	1	0	0	0	0	0	0	0
SNV:-9G,-3T	0	0	0	0	1	0	0	0	0	0	0	0
SNV:-16G,-9T,-4C,2T	0	0	0	0	1	0	0	0	0	0	0	0
SNV:-12A,-8G,-1A	0	0	0	0	1	0	0	0	0	0	0	0
SNV:-13A,-4C,-2T	0	0	0	0	1	0	0	0	0	0	0	0
SNV:-16G,-6G,-1T,1C	0	0	0	0	1	0	0	0	0	0	0	0
SNV:-14T,-7T	0	0	0	0	1	0	0	0	0	0	0	0
SNV:-17T,-12T,-5A	0	0	0	0	1	0	0	0	0	0	0	0
SNV:-16G,-14C,-12A,5A	0	0	0	0	1	0	0	0	0	0	0	0
SNV:-11G,3C	0	0	0	0	1	0	0	0	0	0	0	0
SNV:-4G,-1C	0	0	0	0	1	0	0	0	0	0	0	0
SNV:-16G,-11A,-10A	0	0	0	0	1	0	0	0	0	0	0	0
SNV:-16G,-13G,-12A,-9G	0	0	0	0	1	0	0	0	0	0	0	0
SNV:-12A,-9T,-1A	0	0	0	0	1	0	0	0	0	0	0	0
SNV:2A,4C	0	0	0	0	1	0	0	0	0	0	0	0
SNV:-17T,-12A,-11G,-1C,2A	0	0	0	0	1	0	0	0	0	0	0	0
SNV:-9G,3A,5A,6A	0	0	0	0	1	0	0	0	0	0	0	0
SNV:1G,3A	0	0	0	0	1	0	0	0	0	0	0	0
SNV:-17T,-14T,-12T	0	0	0	0	1	0	0	0	0	0	0	0
SNV:-13A,-3C,2A	0	0	0	0	1	0	0	0	0	0	0	0
SNV:-16G,-14T	0	0	0	0	1	0	0	0	0	0	0	0
SNV:-4G,6T	0	0	0	0	1	0	0	0	0	0	0	0
SNV:-9T,6C	0	0	0	0	1	0	0	0	0	0	0	0
SNV:-4C,1C,3T,4G	0	0	0	0	1	0	0	0	0	0	0	0
SNV:-14A,-11A,-2T	0	0	0	0	1	0	0	0	0	0	0	0
SNV:-15C,-5A	0	0	0	0	1	0	0	0	0	0	0	0
SNV:-6C,-5A,-4G,-1T	0	0	0	0	1	0	0	0	0	0	0	0
SNV:-16G,-14T,5A	0	0	0	0	1	0	0	0	0	0	0	0
SNV:-13T,-9G,2A	0	0	0	0	1	0	0	0	0	0	0	0
SNV:-13T,-1T,1C,3C	0	0	0	0	1	0	0	0	0	0	0	0
SNV:-16C,-3C	0	0	0	0	1	0	0	0	0	0	0	0
SNV:-3T,5T	0	0	0	0	1	0	0	0	0	0	0	0
SNV:1G,6A	0	0	0	0	1	0	0	0	0	0	0	0
SNV:-4C,-2C	0	0	0	0	1	0	0	0	0	0	0	0
SNV:-10T,-1T,1C,5C,6A	0	0	0	0	1	0	0	0	0	0	0	0
SNV:-16G,3C	0	0	0	0	1	0	0	0	0	0	0	0
SNV:-10T,-6T	0	0	0	0	1	0	0	0	0	0	0	0
SNV:-16G,-9C,5A	0	0	0	0	1	0	0	0	0	0	0	0
SNV:-11A,-2G,-1A	0	0	0	0	1	0	0	0	0	0	0	0
SNV:-14C,-11G,5A,6A	0	0	0	0	1	0	0	0	0	0	0	0
SNV:-9T,-6T,-2C,-1T	0	0	0	0	1	0	0	0	0	0	0	0
SNV:-13T,-10C,-6C	0	0	0	0	1	0	0	0	0	0	0	0
SNV:-12A,-6G,2A	0	0	0	0	1	0	0	0	0	0	0	0
SNV:-2G,4G	0	0	0	0	1	0	0	0	0	0	0	0
SNV:-8G,-6G,-2C	0	0	0	0	1	0	0	0	0	0	0	0
SNV:-4G,5A	0	0	0	0	1	0	0	0	0	0	0	0
SNV:-13A,5T	0	0	0	0	1	0	0	0	0	0	0	0
SNV:-9G,3C	0	0	0	0	1	0	0	0	0	0	0	0
SNV:-17T,-12A,-11G	0	0	0	0	1	0	0	0	0	0	0	0
SNV:-14T,-12T	0	0	0	0	1	0	0	0	0	0	0	0
SNV:-9T,-6C	0	0	0	0	1	0	0	0	0	0	0	0
SNV:-8C,-7C,-6T,-4C,-2G,-1A	0	0	0	0	1	0	0	0	0	0	0	0
SNV:-17T,-11G,1C,2A	0	0	0	0	1	0	0	0	0	0	0	0
SNV:-5G,-2C	0	0	0	0	1	0	0	0	0	0	0	0
SNV:-5G,-3T	0	0	0	0	1	0	0	0	0	0	0	0
SNV:-16T,-15C,-13G,-9C,-1C,6T	0	0	0	0	1	0	0	0	0	0	0	0
SNV:-17T,-10T,6T	0	0	0	0	1	0	0	0	0	0	0	0
SNV:-17C,-9T	0	0	0	0	1	0	0	0	0	0	0	0
SNV:-8G,6T	0	0	0	0	1	0	0	0	0	0	0	0
SNV:-13T,-9G	0	0	0	0	1	0	0	0	0	0	0	0
SNV:-10A,-9G	0	0	0	0	1	0	0	0	0	0	0	0
SNV:-13A,-11G,-2T	0	0	0	0	1	0	0	0	0	0	0	0
SNV:1C,2A,6T	0	0	0	0	1	0	0	0	0	0	0	0
SNV:-17T,-14T	0	0	0	0	1	0	0	0	0	0	0	0
SNV:-13G,-11A,-9G,1G,5C,6T	0	0	0	0	1	0	0	0	0	0	0	0
SNV:-13G,-10T,-9T,-8C,-7T,-6C,-2G,-1T	0	0	0	0	1	0	0	0	0	0	0	0
SNV:-13G,-11A	0	0	0	0	1	0	0	0	0	0	0	0
SNV:3C,6A	0	0	0	0	1	0	0	0	0	0	0	0
SNV:-17A,-13G	0	0	0	0	1	0	0	0	0	0	0	0
SNV:-13T,-9G,-7C,-6T,-1A,3A,6T	0	0	0	0	1	0	0	0	0	0	0	0
SNV:-16C,-6T	0	0	0	0	1	0	0	0	0	0	0	0
SNV:-8A,1C	0	0	0	0	1	0	0	0	0	0	0	0
SNV:-17T,-12A,-4G	0	0	0	0	1	0	0	0	0	0	0	0
SNV:-8A,-1T	0	0	0	0	1	0	0	0	0	0	0	0
SNV:-14C,3T	0	0	0	0	1	0	0	0	0	0	0	0
SNV:-16C,-15T,-14T,-12T,-3C,1C,2C,3T,4C	0	0	0	0	1	0	0	0	0	0	0	0
SNV:-2T,6A	0	0	0	0	1	0	0	0	0	0	0	0
SNV:-13T,-6G	0	0	0	0	1	0	0	0	0	0	0	0
SNV:-17T,-13T,2A	0	0	0	0	1	0	0	0	0	0	0	0
SNV:-10T,-6G	0	0	0	0	1	0	0	0	0	0	0	0
SNV:-1A,2T	0	0	0	0	1	0	0	0	0	0	0	0
SNV:-13T,-5A	0	0	0	0	1	0	0	0	0	0	0	0
SNV:-13G,-9G,-1C	0	0	0	0	1	0	0	0	0	0	0	0
SNV:-7T,5T	0	0	0	0	1	0	0	0	0	0	0	0
SNV:-15C,-4G	0	0	0	0	1	0	0	0	0	0	0	0
SNV:1C,2T	0	0	0	0	1	0	0	0	0	0	0	0
SNV:-17T,-6G,-4G,6T	0	0	0	0	1	0	0	0	0	0	0	0
SNV:-2C,-1A	0	0	0	0	1	0	0	0	0	0	0	0
SNV:-6T,-3T	0	0	0	0	1	0	0	0	0	0	0	0
SNV:2A,6A	0	0	0	0	1	0	0	0	0	0	0	0
SNV:-16G,-12A,-9G,5A	0	0	0	0	1	0	0	0	0	0	0	0
SNV:2C,3A,4G	0	0	0	0	1	0	0	0	0	0	0	0
SNV:-4C,5C	0	0	0	0	1	0	0	0	0	0	0	0
SNV:-13A,-9T,-6C	0	0	0	0	1	0	0	0	0	0	0	0
SNV:-10T,1C	0	0	0	0	1	0	0	0	0	0	0	0
SNV:-16C,-13T	0	0	0	0	1	0	0	0	0	0	0	0
SNV:-10A,-9C,5A	0	0	0	0	1	0	0	0	0	0	0	0
SNV:-16C,3C	0	0	0	0	1	0	0	0	0	0	0	0
SNV:-14C,5A	0	0	0	0	1	0	0	0	0	0	0	0
SNV:2T,3C	0	0	0	0	1	0	0	0	0	0	0	0
SNV:-16C,-15T,-14T,-12T,-3T,1T,2T,3T,4T	0	0	0	0	1	0	0	0	0	0	0	0
SNV:-12T,1C	0	0	0	0	1	0	0	0	0	0	0	0
SNV:3C,5A	0	0	0	0	1	0	0	0	0	0	0	0
SNV:-13A,-12A,2A,5A	0	0	0	0	1	0	0	0	0	0	0	0
SNV:-13A,-11A,-9G,-5A	0	0	0	0	1	0	0	0	0	0	0	0
SNV:-13G,-6G,2A	0	0	0	0	1	0	0	0	0	0	0	0
SNV:-14A,5C	0	0	0	0	1	0	0	0	0	0	0	0
SNV:-17C,-4C,2A	0	0	0	0	1	0	0	0	0	0	0	0
SNV:-8A,-2C,-1A	0	0	0	0	1	0	0	0	0	0	0	0
SNV:-13G,1C	0	0	0	0	1	0	0	0	0	0	0	0
SNV:-13A,3C	0	0	0	0	1	0	0	0	0	0	0	0
SNV:-11G,-1C	0	0	0	0	1	0	0	0	0	0	0	0
SNV:-5A,3T	0	0	0	0	1	0	0	0	0	0	0	0
SNV:-11G,-4G	0	0	0	0	1	0	0	0	0	0	0	0
SNV:-16C,-10T	0	0	0	0	1	0	0	0	0	0	0	0
SNV:-17T,-12A,-11G,-6G,-4G,-3C	0	0	0	0	1	0	0	0	0	0	0	0
SNV:-16G,-14C,3C	0	0	0	0	1	0	0	0	0	0	0	0
SNV:-16G,-14C,-13T,-4C	0	0	0	0	1	0	0	0	0	0	0	0
SNV:-16C,-13A	0	0	0	0	0	1	0	0	0	0	0	0
SNV:2T,6C	0	0	0	0	0	1	0	0	0	0	0	0
SNV:-16C,-13G,2T	0	0	0	0	0	1	0	0	0	0	0	0
SNV:-2G,4C	0	0	0	0	0	1	0	0	0	0	0	0
SNV:-16C,-1T,1T	0	0	0	0	0	1	0	0	0	0	0	0
SNV:1C,6A	0	0	0	0	0	1	0	0	0	0	0	0
SNV:-13G,-11G,-4G,-3C,1C	0	0	0	0	0	1	0	0	0	0	0	0
SNV:1T,5A,6T	0	0	0	0	0	1	0	0	0	0	0	0
SNV:-9T,-1T,1C,4T	0	0	0	0	0	1	0	0	0	0	0	0
SNV:-5T,4C	0	0	0	0	0	1	0	0	0	0	0	0
SNV:-16G,-5A	0	0	0	0	0	1	0	0	0	0	0	0
SNV:-11A,-9C,-6T,4G	0	0	0	0	0	1	0	0	0	0	0	0
SNV:-1T,1C,6A	0	0	0	0	0	1	0	0	0	0	0	0
SNV:-5G,-3G	0	0	0	0	0	1	0	0	0	0	0	0
SNV:-2T,-1T,1C,6T	0	0	0	0	0	1	0	0	0	0	0	0
SNV:-14T,-10A,-6T,3A,5T	0	0	0	0	0	1	0	0	0	0	0	0
SNV:3C,6T	0	0	0	0	0	1	0	0	0	0	0	0
SNV:-13G,1T	0	0	0	0	0	1	0	0	0	0	0	0
SNV:-9G,-4C	0	0	0	0	0	1	0	0	0	0	0	0
SNV:-11G,-5G	0	0	0	0	0	1	0	0	0	0	0	0
SNV:-11G,-9G	0	0	0	0	0	1	0	0	0	0	0	0
[truncated: 1,360 more rows]
