# Supplementary material for: Covalent linkage of the DNA repair template to the CRISPR-Cas9 nuclease enhances homology-directed repair
Source: eLife. 2018 May 29;7:e33761. doi: 10.7554/eLife.33761 (PMC6023611; doi:10.7554/eLife.33761)
Supplement: Supplementary file 4. — Reads were classified as ‘indel’ if any insertions or deletions were present in the guide region, as ‘no variant’ if they perfectly matched the guide reference, (for on-target loci) ‘corrected’ if the targeted bases were changed as expected, and ‘mismatch’ if any other nucleotide changes were present. [file elife-33761-supp4.xlsx]

## Sheet: K562_HBB
Sample	No.variant	Perfectly.corrected	Corrected.plus.inframe.indel	Corrected.plus.frameshift.indel	Inframe.indel	Frameshift.indel	Mismatch	Total
I NT	76966	0	0	0	3	23	456	77448
I RNP unco. 65-mer	81389	14	0	0	90	213	819	82525
I RNPD coup. 65-mer	88923	623	1	6	548	821	655	91577
II NT	120442	0	0	0	3	40	669	121154
II RNP unco. 65-mer	99922	19	0	0	172	218	1082	101413
II RNPD coup. 65-mer	117636	423	2	7	499	634	765	119966
III NT	108322	1	0	0	2	47	592	108964
III RNP unco. 65-mer	109318	10	0	0	66	117	663	110174
III RNPD coup. 65-mer	79000	246	0	8	127	302	561	80244
IV NT	76653	2	0	0	5	27	924	77611
IV RNP unco. 65-mer	82859	6	0	0	50	109	482	83506
IV RNPD coup. 65-mer	87693	204	0	7	126	267	605	88902

## Sheet: mESC_Rosa26
Sample	No.variant	Perfectly.corrected	Corrected.plus.inframe.indel	Corrected.plus.frameshift.indel	Inframe.indel	Frameshift.indel	Mismatch	Total
I NT	455344	23	0	1	201	236	3769	459574
I RNP	482883	22	4	2	44237	28294	4330	559772
I RNP unco. 65mer	452985	10225	104	747	39282	31782	4654	539779
I RNPD coup. 65mer	440890	8180	2	82	15403	15162	3581	483300
II NT	37857	5	0	0	88	57	298	38305
II RNP	49077	4	0	0	4018	2623	459	56181
II RNP unco. 65mer	52493	920	21	51	4285	3288	494	61552
II RNPD coup. 65mer	56621	1130	14	26	1897	1835	608	62131
III NT	47184	2	0	0	6	14	398	47604
III RNP	54182	9	0	0	2629	1657	550	59027
III RNP unco. 65mer	53888	355	4	41	2001	1695	409	58393
III RNPD coup. 65mer	58219	441	0	15	1026	813	485	60999

## Sheet: mESC_Pcsk9
Sample	No.variant	Perfectly.corrected	Corrected.plus.inframe.indel	Corrected.plus.frameshift.indel	Inframe.indel	Frameshift.indel	Mismatch	Total
I NT	95148	0	0	0	10	11	1102	96271
I RNP unco. 65-mer	108723	139	14	10	1425	735	2488	113534
I RNPD coup. 65-mer	117436	469	5	9	519	357	1087	119882
II NT	132512	0	0	0	2	25	1040	133579
II RNP unco. 65-mer	129089	268	18	7	2232	1142	2805	135561
II RNPD coup. 65-mer	123309	790	9	2	707	458	1336	126611
III NT	134907	0	0	0	3	31	1524	136465
III RNP unco. 65-mer	114567	207	18	18	1638	864	1130	118442
III RNPD coup. 65-mer	91026	788	21	25	640	450	1060	94010

## Sheet: Reporter_mutRFP-On_target
Sample	No.variant	Perfectly.corrected	Corrected.plus.inframe.indel	Corrected.plus.frameshift.indel	Inframe.indel	Frameshift.indel	Mismatch	Total
I NT	96200	210	0	0	193	594	720	97917
I RNP + 65mer unco. (SpCas9 WT)	86108	1403	13	17	3108	11331	856	102836
I RNPD + 65mer coup. (SpCas9-SNAP)	88193	5830	21	131	1669	6808	899	103551
II NT	71484	150	5	0	27	588	580	72834
II RNP + 65mer unco. (SpCas9 WT)	50594	332	0	2	1223	4878	434	57463
II RNPD + 65mer coup. (SpCas9-SNAP)	59544	3284	9	45	903	4377	607	68769
III NT	72075	65	0	1	29	173	639	72982
III RNP + 65mer unco. (SpCas9 WT)	58049	249	0	0	1845	7042	655	67840
III RNPD + 65mer coup. (SpCas9-SNAP)	54322	2643	16	74	813	3341	559	61768

## Sheet: Reporter_mutRFP-Off_target-1
Sample	No.variant	Frameshift.indel	Inframe.indel	Mismatch	Total
I NT	205175	33	2	1830	207040
I RNP + 65mer unco. (SpCas9 WT)	142426	31	25	1303	143785
I RNPD + 65mer coup. (SpCas9-SNAP)	237252	44	2	2017	239315
II NT	144149	30	0	1316	145495
II RNP + 65mer unco. (SpCas9 WT)	150456	39	7	1284	151786
II RNPD + 65mer coup. (SpCas9-SNAP)	305050	82	0	2487	307619
III NT	93001	15	0	606	93622
III RNP + 65mer unco. (SpCas9 WT)	106614	19	1	942	107576
III RNPD + 65mer coup. (SpCas9-SNAP)	518793	133	1	3711	522638

## Sheet: Reporter_mutRFP-Off_target-2
Sample	No.variant	Frameshift.indel	Inframe.indel	Mismatch	Total
I NT	1022072	224	1	7982	1030279
I RNP + 65mer unco. (SpCas9 WT)	90328	15	0	733	91076
I RNPD + 65mer coup. (SpCas9-SNAP)	152167	46	1	1335	153549
II NT	130072	28	0	1121	131221
II RNP + 65mer unco. (SpCas9 WT)	321519	81	0	2509	324109
II RNPD + 65mer coup. (SpCas9-SNAP)	116221	23	1	910	117155
III NT	103547	27	0	642	104216
III RNP + 65mer unco. (SpCas9 WT)	88604	28	1	688	89321
III RNPD + 65mer coup. (SpCas9-SNAP)	105170	42	0	796	106008

## Sheet: Reporter_mutRFP-Off_target-3
Sample	No.variant	Frameshift.indel	Inframe.indel	Mismatch	Total
I NT	184363	28	1	1148	185540
I RNP + 65mer unco. (SpCas9 WT)	90314	18	0	586	90918
I RNPD + 65mer coup. (SpCas9-SNAP)	269080	39	0	1618	270737
II NT	94683	10	1	621	95315
II RNP + 65mer unco. (SpCas9 WT)	85854	18	0	543	86415
II RNPD + 65mer coup. (SpCas9-SNAP)	124693	18	2	757	125470
III NT	97428	16	0	548	97992
III RNP + 65mer unco. (SpCas9 WT)	117148	18	0	682	117848
III RNPD + 65mer coup. (SpCas9-SNAP)	96460	19	0	582	97061

## Sheet: HEK293T_HBB
Sample	No.variant	Perfectly.corrected	Corrected.plus.inframe.indel	Corrected.plus.frameshift.indel	Inframe.indel	Frameshift.indel	Mismatch	Total
I NT	178125	2	0	0	6	99	1182	179414
I RNP + 65mer unco. (SpCas9 WT)	125117	117	1	2	2029	3084	1016	131366
I RNPD + 65mer coup. (SpCas9-SNAP)	133553	2943	0	33	1926	3881	1228	143564
II NT	176531	5	0	0	8	100	1317	177961
II RNP + 65mer unco. (SpCas9 WT)	159632	112	15	22	1463	2257	3013	166514
II RNPD + 65mer coup. (SpCas9-SNAP)	140289	4373	26	71	2622	5510	1466	154357
III NT	174677	1	0	0	6	94	1393	176171
III RNP + 65mer unco. (SpCas9 WT)	161360	86	0	2	1183	1110	1076	164817
III RNPD + 65mer coup. (SpCas9-SNAP)	130164	2482	2	36	840	1600	1205	136329
IV NT	157844	1	0	0	2	77	1090	159014
IV RNP unco. 65-mer (SpCas9 WT)	162447	46	0	0	928	1065	3140	167626
IV RNPD coup. 65-mer (SpCas9-SNAP)	157860	2438	6	11	906	1747	1480	164448

## Sheet: HEK293T_EMX1
Sample	No.variant	Perfectly.corrected	Corrected.plus.inframe.indel	Corrected.plus.frameshift.indel	Inframe.indel	Frameshift.indel	Mismatch	Total
I NT	117415	1	0	0	1	46	833	118296
I RNP + 65mer unco. (SpCas9 WT)	117695	120	0	0	515	1881	861	121072
I RNPD + 65mer coup. (SpCas9-SNAP)	99060	5018	0	76	1155	5232	1012	111553
II NT	104851	1	0	0	1	21	800	105674
II RNP + 65mer unco. (SpCas9 WT)	106603	51	0	0	237	1364	1924	110179
II RNPD + 65mer coup. (SpCas9-SNAP)	107823	214	2	15	151	812	892	109909
III NT	102065	0	0	0	0	32	618	102715
III RNP + 65mer unco. (SpCas9 WT)	118468	56	0	0	158	681	803	120166
III RNPD + 65mer coup. (SpCas9-SNAP)	105665	925	1	21	233	1105	761	108711
IV NT	98554	0	0	0	1	23	662	99240
IV RNP unco. 65-mer (SpCas9 WT)	87565	51	0	0	95	519	1142	89372
IV RNPD coup. 65-mer (SpCas9-SNAP)	87337	960	2	33	162	1106	610	90210

## Sheet: HEK293T_CXCR4
Sample	No.variant	Perfectly.corrected	Corrected.plus.inframe.indel	Corrected.plus.frameshift.indel	Inframe.indel	Frameshift.indel	Mismatch	Total
I NT	117687	11	0	0	4	23	812	118537
I RNP + 65mer unco. (SpCas9 WT)	158790	72	0	2	1154	3883	1058	164959
I RNPD + 65mer coup. (SpCas9-SNAP)	141684	7936	10	74	2930	10136	1328	164098
II NT	128743	8	0	0	4	47	874	129676
II RNP + 65mer unco. (SpCas9 WT)	129526	106	5	0	1099	3609	1782	136127
II RNPD + 65mer coup. (SpCas9-SNAP)	131104	8477	8	42	2693	10513	1288	154125
III NT	123398	2	0	0	2	21	738	124161
III RNP + 65mer unco. (SpCas9 WT)	121553	17	0	0	365	1190	811	123936
III RNPD + 65mer coup. (SpCas9-SNAP)	123911	1455	0	42	519	2039	849	128815
IV NT	145726	4	0	0	1	36	993	146760
IV RNP unco. 65-mer (SpCas9 WT)	129401	67	0	4	424	1290	1622	132808
IV RNPD coup. 65-mer (SpCas9-SNAP)	120440	1294	15	11	406	1631	901	124698
