# Supplementary figures and images for: Covalent linkage of the DNA repair template to the CRISPR-Cas9 nuclease enhances homology-directed repair
Source: eLife journal article supplement (doi:10.7554/elife.33761), 2018-05-29

Figure 3 - Figure Supplement 1

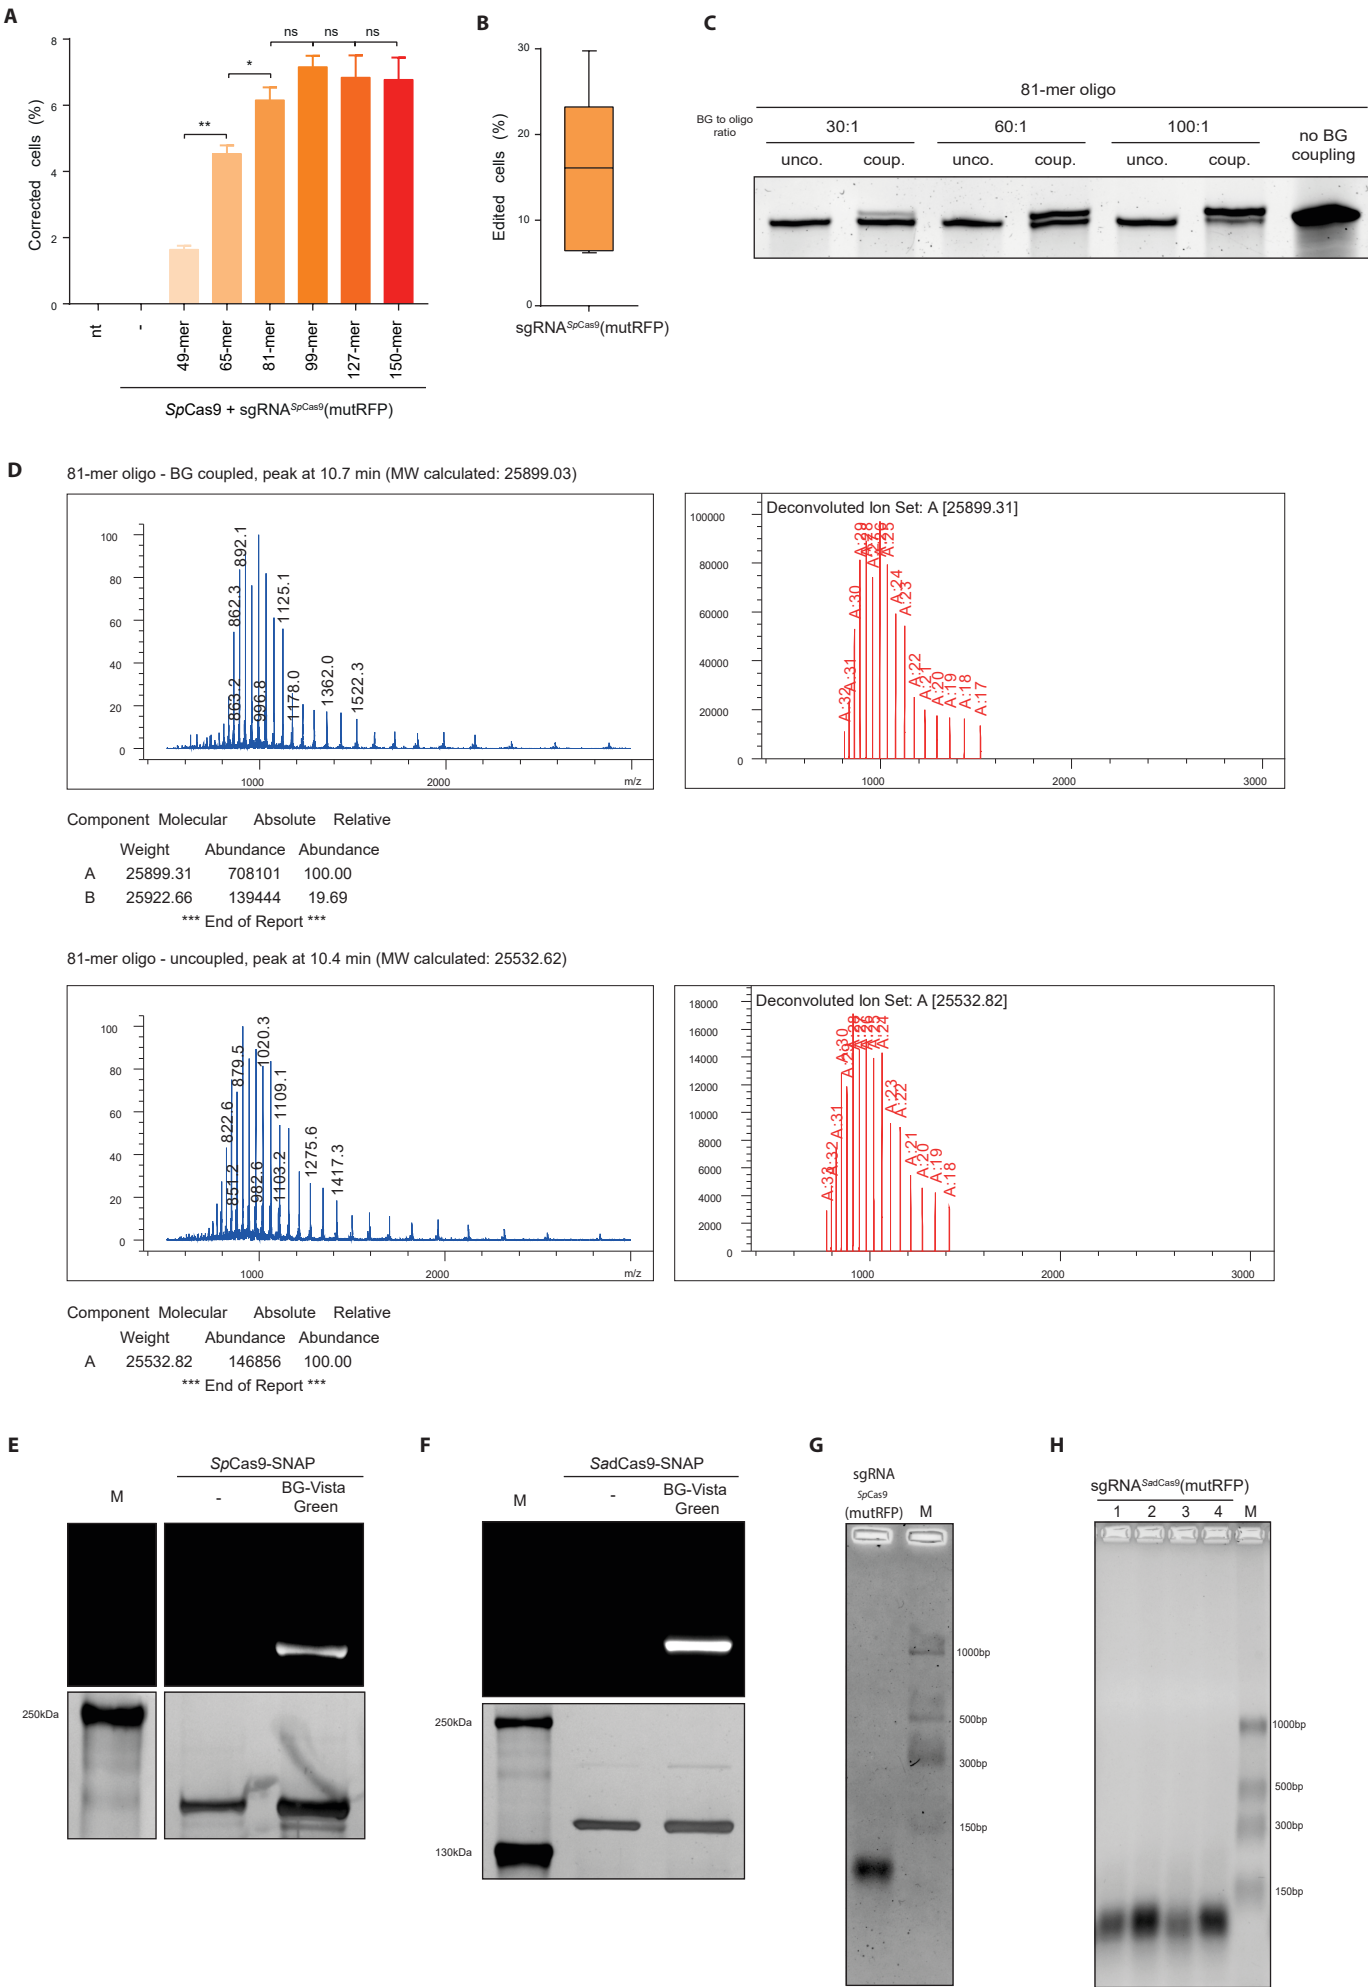

Supplement: supp [file elife_poa_e33761_Figure_3_figure_supplement_1.pdf › elife_poa_e33761_Figure_3_figure_supplement_1.pdf]

Figure 4 - Figure Supplement 1

A

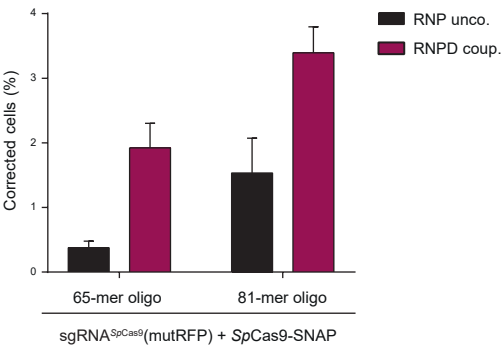

B

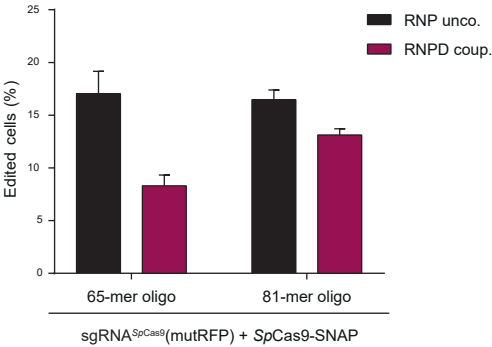

C

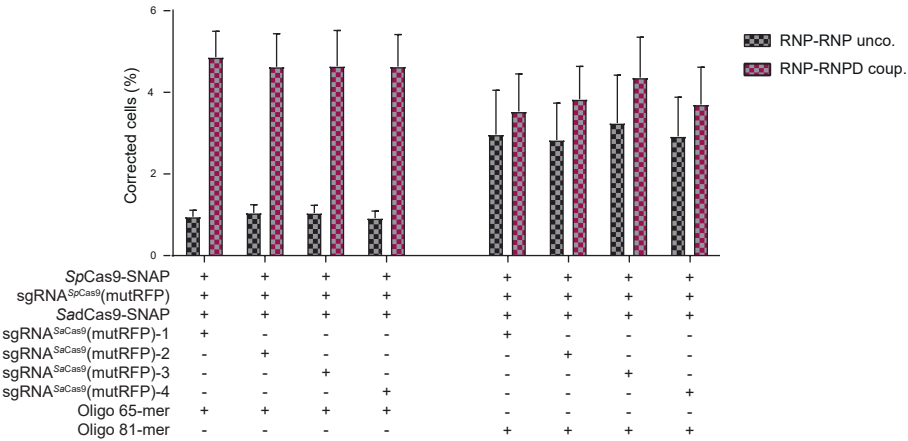

D

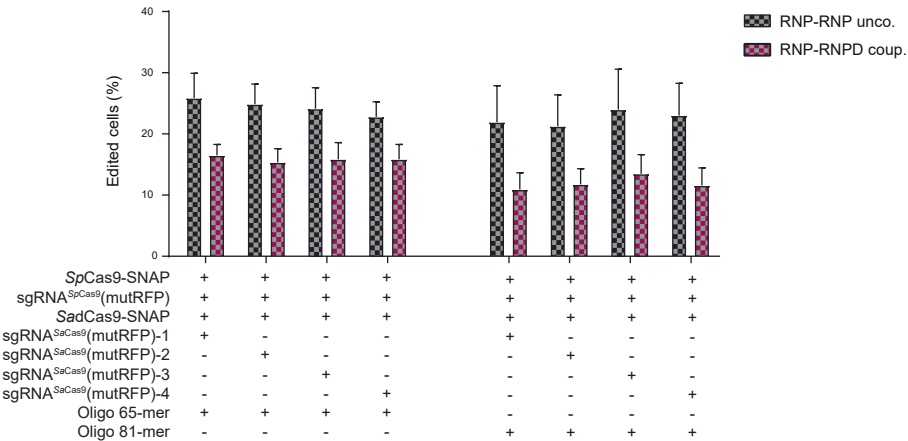

E

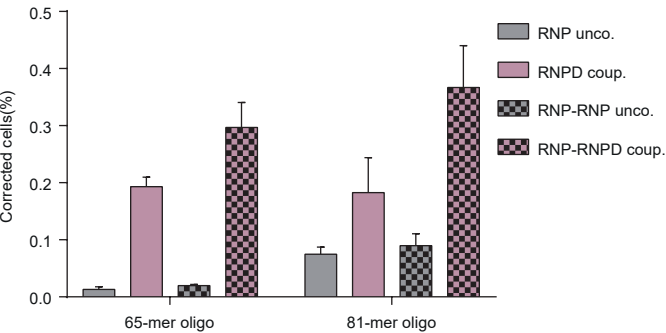

F

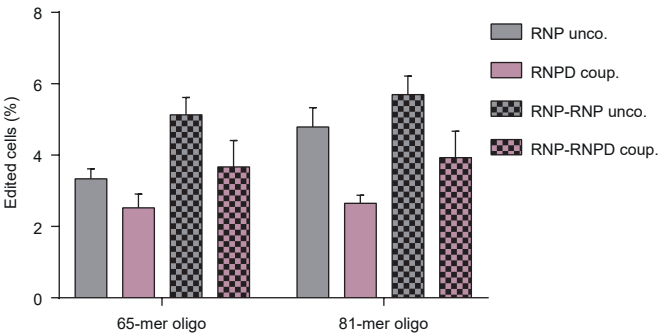

Supplement: supp [file elife_poa_e33761_Figure_4_figure_supplement_1.pdf › elife_poa_e33761_Figure_4_figure_supplement_1.pdf]

**Figure 4 - Figure Supplement 2**

**A**

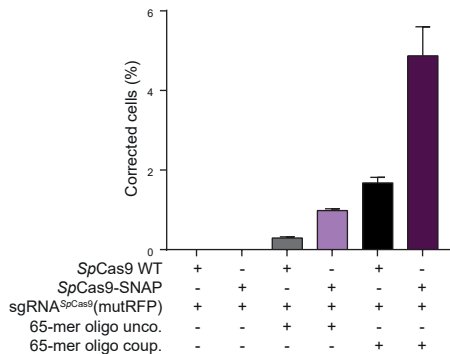

**B**

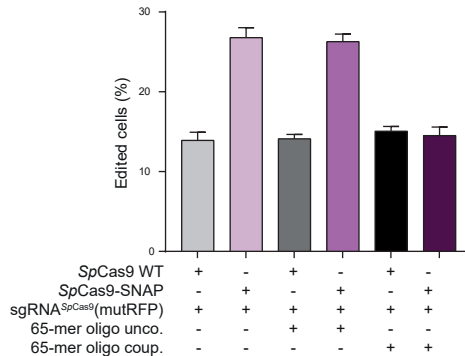

**C**

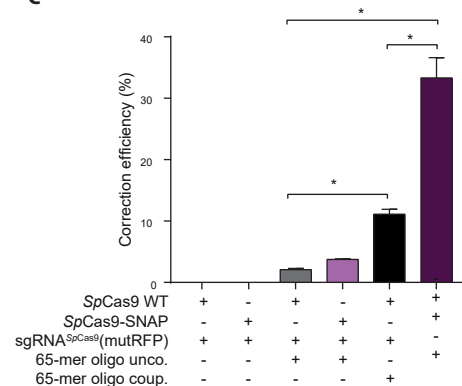

**D**

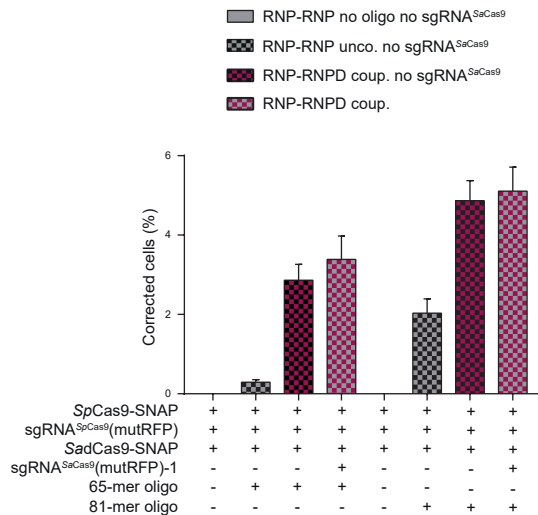

**E**

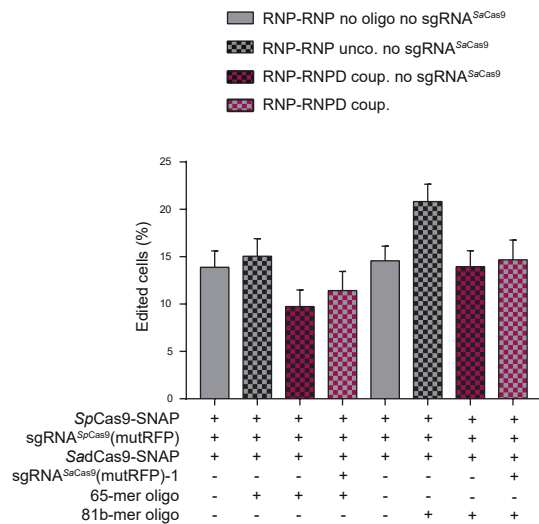

Supplement: supp [file elife_poa_e33761_Figure_4_figure_supplement_2.pdf › elife_poa_e33761_Figure_4_figure_supplement_2.pdf]
